# Supplementary material for: The construction of chiral 3-acyl bicyclolactamsviaa RuPHOX/Pd catalyzed asymmetric allylic substitution cascade of α-carbonylamides
Source: Royal Society of Chemistry journal article supplement (doi:10.1039/d3qo00055a), 2023-01-01
Supplement: d3qo00055a1.pdf [file d3qo00055a1.pdf]

# Supporting Information

## The Construction of Chiral 3-Acyl Bicyclopentanes via a RuPHOX/Pd Catalyzed Asymmetric Allylic Substitution Cascade of $\alpha$ - Carbonylamides

Siqi Dong,<sup>a</sup> Shaofeng Xu,<sup>a</sup> Yashi Zou,<sup>a</sup> Zhaodi Li,<sup>a</sup> Kai Xu,<sup>b</sup> Daxu Fu,<sup>\*b</sup> Delong Liu,<sup>\*a</sup> and  
Wanbin Zhang<sup>a,c</sup>

<sup>a</sup> Shanghai Key Laboratory for Molecular Engineering of Chiral Drugs, School of Pharmacy,  
Shanghai Jiao Tong University, 800 Dongchuan Road, Shanghai 200240, P.R. China.

<sup>b</sup> Shanghai Institute for Biomedical and Pharmaceutical Technologies, 779 Laohumin Road,  
Shanghai 200237, P.R. China.

<sup>c</sup> Frontier Science Center for Transformative Molecules, School of Chemistry and Chemical  
Engineering, Shanghai Jiao Tong University, 800 Dongchuan Road, Shanghai 200240, P.R. China.

Supporting information for this article is given via a link at the end of the document.

## Table of Contents

|                                                    |     |
|----------------------------------------------------|-----|
| 1. General Information.....                        | 1   |
| 2. Preparation of $\alpha$ -Carbonylamides .....   | 1   |
| 3. Pd-Catalyzed Allylic Substitution Cascade ..... | 10  |
| 4. Mechanism Experiments.....                      | 22  |
| 5. Large Scale Reaction and Transformations .....  | 28  |
| 6. NMR Spectra .....                               | 33  |
| 7. HPLC Data.....                                  | 94  |
| 8. X-Ray Crystal Structure Analysis .....          | 122 |
| 9. Calculation Experiment .....                    | 124 |
| 10. References.....                                | 153 |

## 1. General Information

Unless specified otherwise, all reactions were carried out under nitrogen atmosphere using dried glassware. Solvents were dried and distilled according to standard procedures before use. Analytical thin layer chromatography (TLC) was performed on precoated silica gel 60 F254 plates. Compounds were visualized by exposure to UV light. Flash column chromatography was performed with silica gel (100-200 mesh). NMR spectra were recorded on a 400 or 500 MHz spectrometer at ambient temperature, and chemical shifts were given in dimensionless  $\delta$  values and were frequency referenced to tetramethylsilane (TMS) in  $^1\text{H}$ ,  $^{13}\text{C}$  and  $^{19}\text{F}$  NMR spectroscopy. The peak patterns are indicated as follows: s, singlet; d, doublet; t, triplet; q, quartet; m, multiple. The coupling constants,  $J$ , are reported in Hertz (Hz). HRMS data were recorded on a Vanquish UHPLC system (ThermoFisher, consisting of a binary pump, a vacuum degasser, an autosampler and a columnoven) & Q Exactive plus Mass spectrometer (ThermoFisher).

## 2. Preparation of $\alpha$ -Carbonylamides

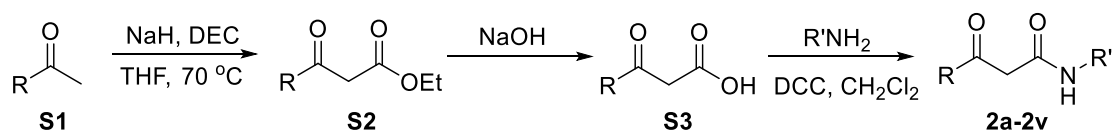

**2a**, **2h** and **2u**, **6** are known compounds.

**Step 1:** To a stirred solution of ketone (20 mmol) in THF (50 mL), was added diethyl carbonate (DEC, 40 mmol) and NaH (100 mmol, 60%). The reaction mixture was heated at reflux at 70 °C overnight. After cooling to room temperature, the reaction mixture was quenched by the addition of ice-cold water and extracted with ethyl acetate (50 mL  $\times$  3). The combined organic layer was dried over anhydrous Na<sub>2</sub>SO<sub>4</sub> and concentrated under vacuum. The residue was purified by column chromatography on silica gel (petroleum ether/ethyl acetate = 20/1) to obtain the corresponding  $\beta$ -ketoesters **S2** (yields up to 99%).

**Step 2:**  $\beta$ -ketoesters **S2** (20 mmol, 1.0 equiv) and aqueous NaOH (2 M, 20 mL) are stirred for 12 h at room temperature. Upon completion, the reaction mixture was diluted with ethyl acetate (20 mL) and the two phases were separated. The aqueous phase was washed with ethyl acetate (2  $\times$  2 mL), and cooled to 0 °C before it was acidified with aqueous HCl (1 M) to pH 1~2. If a precipitate was observed, the  $\beta$ -ketoacid (**S3**) was filtered, washed with H<sub>2</sub>O, dried under vacuum, and used without further purification (yields up to 90%). Otherwise, the reaction contents were extracted with CH<sub>2</sub>Cl<sub>2</sub> (3  $\times$

50 mL), and the combined organic extracts were dried over anhydrous Na<sub>2</sub>SO<sub>4</sub>, filtered, and concentrated (bath set to less than 30 °C) to give the desired  $\beta$ -ketoacids **S3** (yields up to 90%) which were used without further purification.

**Step3:** To a solution of *N*-substituted aniline (10 mmol) in DCM (50 mL) was added **S3** (10 mmol, 1.0 equiv) and DCC (2.06 g, 10 mmol, 1.0 equiv). The reaction mixture was stirred at room temperature until TLC indicated the total consumption of the substrate. The mixture was filtered through a short pad of silica gel, and the filtrate was evaporated to partially remove the solvent. The residue was treated with saturated aqueous NaHCO<sub>3</sub> (50 mL) followed by aqueous HCl (1 M) and extracted with CH<sub>2</sub>Cl<sub>2</sub> (50 mL  $\times$  3). The combined organic layer was dried over anhydrous Na<sub>2</sub>SO<sub>4</sub>. The solvent was removed under vacuum, and the crude product was purified by silica gel flash column chromatography to give the corresponding 3-oxo-*N*-propanamides **2b-2v**.

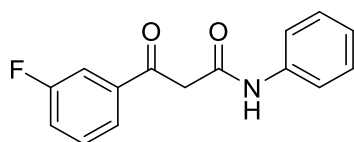

**2b**

**3-(3-Fluorophenyl)-3-oxo-*N*-phenylpropanamide (2b):** Purified by flash column chromatography (petroleum ether/ethyl acetate = 5/1) to give a white solid (2.0 g, 38%, keto/enol = 10/3). Mp: 108~109 °C; <sup>1</sup>H NMR (400 MHz, CDCl<sub>3</sub>)  $\delta$  = 9.08 (s, 1H), 7.72 (d, *J* = 7.7 Hz, 1H), 7.62 (dt, *J* = 9.3, 2.1 Hz, 1H), 7.53–7.33 (m, 5H), 7.18 (s, 1H), 7.05 (t, *J* = 7.4 Hz, 1H), 4.01 (s, 2H); <sup>13</sup>C NMR (101 MHz, CDCl<sub>3</sub>)  $\delta$  = 195.0, 164.1, 163.5, 138.0 (d, *J* = 6.1 Hz), 137.4, 130.7 (d, *J* = 7.1 Hz), 129.1, 124.8, 124.5 (d, *J* = 3.0 Hz), 121.4 (d, *J* = 22.2 Hz), 120.2, 115.3 (d, *J* = 25.3 Hz), 45.9; <sup>19</sup>F NMR (376 MHz, CDCl<sub>3</sub>)  $\delta$  = -110.8; IR (KBr) (v/cm<sup>-1</sup>): 3321, 3076, 2926, 2853, 1720, 1653, 1644, 1599, 1546, 756, 687; HRMS (ESI) calcd for C<sub>15</sub>H<sub>12</sub>FNNaO<sub>2</sub> (M+Na)<sup>+</sup> 280.0744, found 280.0740.

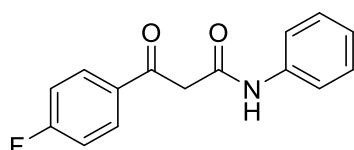

**2c**

**3-(4-Fluorophenyl)-3-oxo-*N*-phenylpropanamide (2c):** Purified by flash column chromatography (petroleum ether/ethyl acetate = 5/1) to give a white solid (1.2 g, 23%). Mp: 130~131 °C; <sup>1</sup>H NMR (400 MHz, CDCl<sub>3</sub>)  $\delta$  = 9.17 (s, 1H), 8.05 (dd, *J* = 8.7, 5.4 Hz, 2H), 7.55 (d, *J* = 7.9 Hz, 2H), 7.31 (t, *J* = 7.8 Hz, 2H), 7.19–7.02 (m, 3H), 4.06 (s, 2H); <sup>13</sup>C NMR (101 MHz, CDCl<sub>3</sub>)  $\delta$  = 194.7, 165.2, 163.6, 137.5, 132.5, 131.5 (d, *J* = 10.1 Hz), 129.0, 124.7, 120.2, 116.2 (d, *J* = 22.2 Hz), 45.8; <sup>19</sup>F NMR (376 MHz, CDCl<sub>3</sub>)

$\delta = -102.4$ ; IR (KBr) ( $\text{v}/\text{cm}^{-1}$ ): 3292, 3070, 2932, 2854, 1680, 1660, 1595, 1534, 1443, 841, 752, 689; HRMS (ESI) calcd for  $\text{C}_{15}\text{H}_{12}\text{FNNaO}_2$  ( $\text{M}+\text{Na}$ ) $^+$  280.0744, found 280.0738.

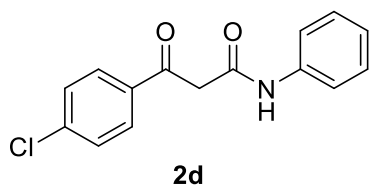

**3-(4-Chlorophenyl)-3-oxo-N-phenylpropanamide (2d):** Purified by flash column chromatography (petroleum ether/ethyl acetate = 5/1) to give a white solid (1.9 g, 35%, ketone/enolate = 5/1). Mp: 131~132 °C;  $^1\text{H}$  NMR (400 MHz,  $\text{CDCl}_3$ )  $\delta = 9.17$  (s, 1H), 7.73–7.32 (m, 8H), 7.15 (t,  $J = 7.4$  Hz, 1H), 4.10 (s, 2H);  $^{13}\text{C}$  NMR (101 MHz,  $\text{CDCl}_3$ )  $\delta = 195.1, 163.4, 141.0, 137.4, 134.3, 130.0, 129.3, 129.0, 128.8, 127.2, 124.7, 120.1, 77.2, 45.7$ ; IR (KBr) ( $\text{v}/\text{cm}^{-1}$ ): 3277, 2929, 2840, 1691, 1651, 1544, 1514, 1420, 825, 748, 689; HRMS (ESI) calcd for  $\text{C}_{15}\text{H}_{12}^{35}\text{ClNaNO}_2$  ( $\text{M}+\text{Na}$ ) $^+$  296.0449, found 296.0445, calcd for  $\text{C}_{15}\text{H}_{12}^{37}\text{ClNaNO}_2$  ( $\text{M}+\text{Na}$ ) $^+$  298.0420, found 298.0412.

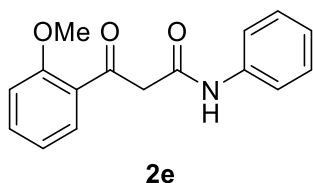

**3-(2-Methoxyphenyl)-3-oxo-N-phenylpropanamide (2e):** Purified by flash column chromatography (petroleum ether/ethyl acetate = 3/1) to give a white solid (2.5 g, 46%). Mp: 117~118 °C;  $^1\text{H}$  NMR (400 MHz,  $\text{CDCl}_3$ )  $\delta = 9.34$  (s, 1H), 7.77 (dd,  $J = 7.7, 1.8$  Hz, 1H), 7.64–7.58 (m, 2H), 7.56–7.50 (m, 1H), 7.33 (t,  $J = 7.9$  Hz, 2H), 7.15–7.08 (m, 1H), 7.07–6.96 (m, 2H), 4.15 (s, 2H), 3.91 (s, 3H);  $^{13}\text{C}$  NMR (101 MHz,  $\text{CDCl}_3$ )  $\delta = 198.2, 164.8, 159.0, 137.9, 135.0, 130.7, 129.0, 127.2, 124.3, 120.8, 120.1, 111.7, 55.6, 50.4$ ; IR (KBr) ( $\text{v}/\text{cm}^{-1}$ ): 3307, 3203, 3062, 2932, 2847, 1666, 1660, 1595, 1548, 1446, 1337, 1252, 754, 691; HRMS (ESI) calcd for  $\text{C}_{16}\text{H}_{16}\text{NO}_3$  ( $\text{M}+\text{H}$ ) $^+$  270.1125, found 270.1121.

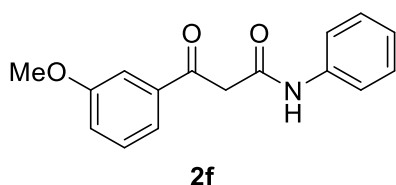

**3-(3-Methoxyphenyl)-3-oxo-N-phenylpropanamide (2f):** Purified by flash column chromatography (petroleum ether/ethyl acetate = 3/1) to give a white solid (2.6 g, 48%). Mp: 121~122 °C;  $^1\text{H}$  NMR (400 MHz,  $\text{CDCl}_3$ )  $\delta = 9.35$  (s, 1H), 7.63–7.57 (m, 3H),



7.55–7.51 (m, 1H), 7.41 (t,  $J = 7.9$  Hz, 1H), 7.34 (t,  $J = 7.9$  Hz, 2H), 7.20–7.10 (m, 2H), 4.10 (s, 2H), 3.86 (s, 3H);  $^{13}\text{C}$  NMR (101 MHz,  $\text{CDCl}_3$ )  $\delta = 196.2, 164.0, 160.0, 137.6, 137.4, 130.0, 129.0, 124.6, 121.3, 120.9, 120.2, 112.6, 55.5, 45.8$ ; IR (KBr) ( $\text{v}/\text{cm}^{-1}$ ): 3292, 3206, 3059, 2926, 2832, 1687, 1656, 1609, 1544, 1443, 1342, 1342, 1256, 758, 685; HRMS (ESI) calcd for  $\text{C}_{16}\text{H}_{16}\text{NO}_3$  ( $\text{M}+\text{H}$ ) $^+$  270.1125, found 270.1120.

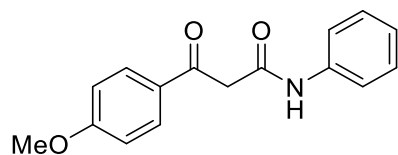

**2g**

**3-(4-Methoxyphenyl)-3-oxo-N-phenylpropanamide (2g):** Purified by flash column chromatography (petroleum ether/ethyl acetate = 3/1) to give a white solid (2.7 g, 46%). Mp: 96~97 °C;  $^1\text{H}$  NMR (400 MHz,  $\text{CDCl}_3$ )  $\delta = 9.39$  (s, 1H), 8.03 (d,  $J = 8.9$  Hz, 2H), 7.58 (d,  $J = 7.9$  Hz, 2H), 7.33 (t,  $J = 7.9$  Hz, 2H), 7.12 (t,  $J = 7.4$  Hz, 1H), 6.98 (d,  $J = 8.9$  Hz, 2H), 4.06 (s, 2H), 3.90 (s, 3H);  $^{13}\text{C}$  NMR (101 MHz,  $\text{CDCl}_3$ )  $\delta = 194.6, 164.5, 164.4, 137.8, 131.1, 129.1, 129.0, 124.4, 120.2, 114.1, 55.6, 45.4, 34.0, 25.6, 25.0$ ; IR (KBr) ( $\text{v}/\text{cm}^{-1}$ ): 3319, 3138, 3062, 2930, 2847, 1685, 1538, 1512, 1468, 1350, 1254, 1194, 758, 690; HRMS (ESI) calcd for  $\text{C}_{16}\text{H}_{15}\text{NNaO}_3$  ( $\text{M}+\text{Na}$ ) $^+$  292.0944, found 292.0939.

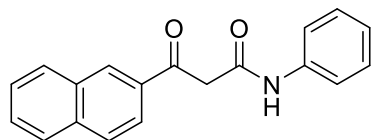

**2i**

**3-(Naphthalen-2-yl)-3-oxo-N-phenylpropanamide (2i):** Purified by flash column chromatography (petroleum ether/ethyl acetate = 3/1) to give a white solid (1.2 g, 40%). Mp: 131~132 °C;  $^1\text{H}$  NMR (400 MHz,  $\text{CDCl}_3$ )  $\delta = 9.41$  (s, 1H), 8.58 (s, 1H), 8.06 (dd,  $J = 8.6, 1.8$  Hz, 1H), 7.99 (d,  $J = 8.1$  Hz, 1H), 7.91 (dd,  $J = 11.8, 8.3$  Hz, 2H), 7.69–7.50 (m, 5H), 7.35 (t,  $J = 7.9$  Hz, 2H), 7.15 (t,  $J = 7.4$  Hz, 1H), 4.26 (s, 2H);  $^{13}\text{C}$  NMR (101 MHz,  $\text{CDCl}_3$ )  $\delta = 196.3, 164.0, 137.6, 136.1, 133.4, 132.4, 131.2, 129.9, 129.3, 129.0, 128.9, 127.8, 127.2, 124.6, 123.5, 120.2, 45.7$ ; IR (KBr) ( $\text{v}/\text{cm}^{-1}$ ): 3307, 3138, 3055, 2926, 2851, 1682, 1664, 1603, 1544, 1443, 1337, 1313, 1188, 748, 699; HRMS (ESI) calcd for  $\text{C}_{19}\text{H}_{16}\text{NO}_2$  ( $\text{M}+\text{H}$ ) $^+$  290.1176, found 290.1172.

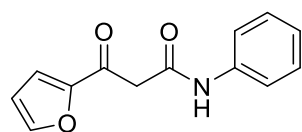

**2j**

**3-(Furan-2-yl)-3-oxo-*N*-phenylpropanamide (2j):** Purified by flash column chromatography (petroleum ether/ethyl acetate = 5/1) to give a white solid (1.1 g, 45%). Mp: 104~106 °C; <sup>1</sup>H NMR (400 MHz, CDCl<sub>3</sub>) δ = 9.17 (s, 1H), 7.56 (s, 1H), 7.47 (d, *J* = 7.5 Hz, 2H), 7.32–7.19 (m, 3H), 7.01 (t, *J* = 7.4 Hz, 1H), 6.49 (dd, *J* = 3.7, 1.7 Hz, 1H), 3.87 (s, 2H); <sup>13</sup>C NMR (101 MHz, CDCl<sub>3</sub>) δ = 184.1, 163.5, 151.7, 148.1, 137.6, 129.0, 124.6, 120.2, 120.0, 113.0, 45.4; IR (KBr) (v/cm<sup>-1</sup>): 3315, 3139, 2924, 2855, 1682, 1656, 1599, 1546, 1447, 1333, 1248, 752, 694; HRMS (ESI) calcd for C<sub>13</sub>H<sub>11</sub>NNaO<sub>3</sub> (M+Na)<sup>+</sup> 252.0631, found 252.0627.

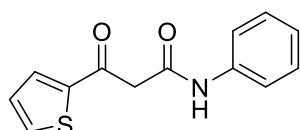

**2k**

**3-Oxo-*N*-phenyl-3-(thiophen-2-yl) propanamide (2k):** Purified by flash column chromatography (petroleum ether/ethyl acetate = 5/1) to give a white solid (0.9 g, 38%). Mp: 129~130 °C; <sup>1</sup>H NMR (400 MHz, CDCl<sub>3</sub>) δ = 9.25 (s, 1H), 7.76 (d, *J* = 3.9 Hz, 1H), 7.66 (d, *J* = 5.0 Hz, 1H), 7.48 (d, *J* = 7.9 Hz, 2H), 7.22 (t, *J* = 7.9 Hz, 2H), 7.12–6.98 (m, 2H), 3.96 (s, 2H); <sup>13</sup>C NMR (101 MHz, CDCl<sub>3</sub>) δ = 188.7, 163.5, 143.2, 137.6, 136.1, 134.2, 129.0, 128.8, 124.6, 120.2, 46.3; IR (KBr) (v/cm<sup>-1</sup>): 3309, 3206, 3145, 3084, 1656, 1605, 1542, 1496, 1445, 1335, 1240, 756, 692; HRMS (ESI) calcd for C<sub>13</sub>H<sub>11</sub>NNaO<sub>2</sub>S (M+Na)<sup>+</sup> 268.0403, found 268.0398.

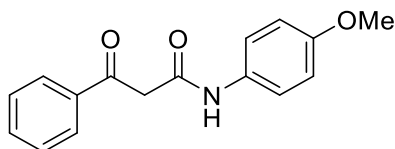

**2l**

***N*-(4-Methoxyphenyl)-3-oxo-3-phenylpropanamide (2l):** Purified by flash column chromatography (petroleum ether/ethyl acetate = 3/1) to give a white solid (1.2 g, 44%). Mp: 120~122 °C; <sup>1</sup>H NMR (400 MHz, CDCl<sub>3</sub>) δ = 9.15 (s, 1H), 8.01 (d, *J* = 7.3 Hz, 2H), 7.62 (t, *J* = 7.3 Hz, 1H), 7.48 (dd, *J* = 16.9, 8.4 Hz, 4H), 6.84 (d, *J* = 8.8 Hz, 2H), 4.08 (s, 2H), 3.77 (s, 3H); <sup>13</sup>C NMR (101 MHz, CDCl<sub>3</sub>) δ = 196.5, 163.8, 156.6, 136.1, 134.3, 130.7, 129.0, 128.6, 128.5, 122.0, 114.1, 55.5, 45.5; IR (KBr) (v/cm<sup>-1</sup>): 3286, 3132, 3057, 2937, 2847, 1711, 1652, 1544, 1512, 1462, 1336, 1236, 757, 685; HRMS (ESI) calcd for C<sub>16</sub>H<sub>16</sub>NO<sub>3</sub> (M+H)<sup>+</sup> 270.1125, found 270.1120.

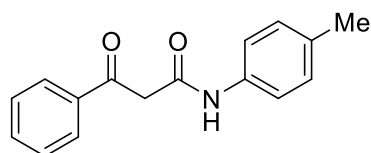

**2m**

**3-Oxo-3-phenyl-N-(p-tolyl) propenamide (2m):** Purified by flash column chromatography (petroleum ether/ethyl acetate = 3/1) to give a white solid (1.9 g, 76%). Mp: 92~93 °C;  $^1\text{H}$  NMR (400 MHz,  $\text{CDCl}_3$ )  $\delta$  = 9.25 (s, 1H), 8.10–8.00 (m, 2H), 7.69–7.61 (m, 1H), 7.56–7.46 (m, 4H), 7.15 (d,  $J$  = 8.1 Hz, 2H), 4.12 (s, 2H), 2.34 (s, 3H);  $^{13}\text{C}$  NMR (101 MHz,  $\text{CDCl}_3$ )  $\delta$  = 196.5, 163.7, 136.1, 135.0, 134.3, 134.2, 129.5, 129.0, 128.6, 120.3, 45.6, 20.9; IR (KBr) ( $\text{v}/\text{cm}^{-1}$ ): 3319, 3206, 3053, 2924, 2843, 1680, 1653, 1542, 1512, 1412, 1335, 1265, 756, 687; HRMS (ESI) calcd for  $\text{C}_{16}\text{H}_{16}\text{NO}_2$  ( $\text{M}+\text{H}$ ) $^+$  254.1176, found 254.1172.

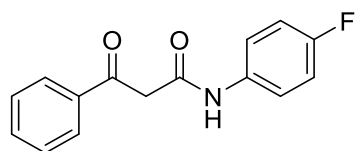

**2n**

**N-(4-Fluorophenyl)-3-oxo-3-phenylpropanamide (2n):** Purified by flash column chromatography (petroleum ether/ethyl acetate = 5/1) to give a white solid (2.1 g, 0.83 %). Mp: 148~149 °C;  $^1\text{H}$  NMR (400 MHz,  $\text{CDCl}_3$ )  $\delta$  = 9.35 (s, 1H), 8.01 (d,  $J$  = 7.2 Hz, 2H), 7.63 (t,  $J$  = 7.4 Hz, 1H), 7.56–7.46 (m, 4H), 7.00 (t,  $J$  = 8.6 Hz, 2H), 4.09 (s, 2H);  $^{13}\text{C}$  NMR (101 MHz,  $\text{CDCl}_3$ )  $\delta$  = 194.7, 166.5 (d,  $J$  = 162.6 Hz), 136.6, 134.5, 133.0, 129.0, 128.6, 122.0, 121.9, 115.7 (d,  $J$  = 22.2 Hz), 45.2;  $^{19}\text{F}$  NMR (376 MHz,  $\text{CDCl}_3$ )  $\delta$  = -117.7; IR (KBr) ( $\text{v}/\text{cm}^{-1}$ ): 3266, 3215, 3088, 2953, 2844, 1690, 1662, 1557, 1506, 1410, 1340, 1208, 831, 754, 687; HRMS (ESI) calcd for  $\text{C}_{15}\text{H}_{12}\text{FNNaO}_2$  ( $\text{M}+\text{Na}$ ) $^+$  280.0744, found 280.0739.

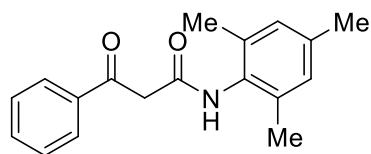

**2o**

**N-Mesityl-3-oxo-3-phenylpropanamide (2o):** Purified by flash column chromatography (petroleum ether/ethyl acetate = 5/1) to give a white solid (1.4 g, 50%). Mp: 177~178 °C;  $^1\text{H}$  NMR (400 MHz,  $\text{CDCl}_3$ )  $\delta$  = 8.46 (s, 1H), 8.08–8.01 (m, 2H), 7.67–7.56 (m, 1H), 7.55–7.49 (m, 2H), 6.88 (s, 2H), 4.15 (s, 2H), 2.25 (s, 3H), 2.16 (s, 6H);  $^{13}\text{C}$  NMR (101 MHz,  $\text{CDCl}_3$ )  $\delta$  = 196.4, 164.3, 137.0, 136.1, 135.0, 134.3, 131.0, 129.0, 128.9, 128.7, 45.4, 20.9, 18.4; IR (KBr) ( $\text{v}/\text{cm}^{-1}$ ): 3211, 3068, 2926, 2843, 1696,

1649, 1592, 1534, 1447, 1342, 1216, 753, 681; HRMS (ESI) calcd for C<sub>18</sub>H<sub>20</sub>NO<sub>2</sub> (M+H)<sup>+</sup> 282.1489, found 282.1484.

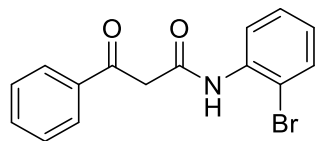

**2p**

***N*-(2-Bromophenyl)-3-oxo-3-phenylpropanamide (2p)**: Purified by flash column chromatography (petroleum ether/ethyl acetate = 3/1) to give a white solid (1.5 g, 47%). Mp: 124~125 °C; <sup>1</sup>H NMR (400 MHz, CDCl<sub>3</sub>) δ = 9.72 (s, 1H), 8.36 (dd, *J* = 8.3, 1.6 Hz, 1H), 8.06 (dd, *J* = 8.3, 1.4 Hz, 2H), 7.66 (t, *J* = 7.4 Hz, 1H), 7.60–7.42 (m, 4H), 7.38–7.29 (m, 1H), 4.19 (s, 2H); <sup>13</sup>C NMR (101 MHz, CDCl<sub>3</sub>) δ = 195.9, 164.0, 136.0, 135.9, 134.4, 132.5, 129.0, 128.6, 128.2, 126.0, 125.5, 122.4, 45.7; IR (KBr) (v/cm<sup>-1</sup>): 3189, 3100, 3026, 2942, 2891, 1688, 1662, 1578, 1538, 1439, 1364, 1210, 754, 745; HRMS (ESI) calcd for C<sub>15</sub>H<sub>13</sub><sup>79</sup>BrNO<sub>2</sub> (M+H)<sup>+</sup> 318.0124, found 318.0121, calcd for C<sub>15</sub>H<sub>13</sub><sup>81</sup>BrNO<sub>2</sub> (M+H)<sup>+</sup> 320.0104, found 320.0097.

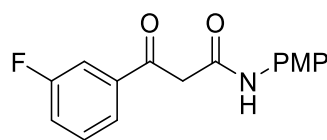

**2q**

**3-(3-Fluorophenyl)-*N*-(4-methoxyphenyl)-3-oxopropanamide (2q)**: Purified by flash column chromatography (petroleum ether/ethyl acetate = 3/1) to give a white solid (0.9 g, 31%, ketone/enolate = 4/1). Mp: 131~132 °C; <sup>1</sup>H NMR (ketone) (400 MHz, CDCl<sub>3</sub>) δ = 9.00 (s, 1H), 7.81 (dt, *J* = 7.8, 1.3 Hz, 1H), 7.71 (dt, *J* = 9.2, 2.2 Hz, 1H), 7.48–7.45 (m, 2H), 7.35 (dd, *J* = 8.2, 2.6 Hz, 1H), 6.88–6.84 (m, 2H), 4.07 (s, 2H), 3.79 (s, 3H); <sup>1</sup>H NMR (enol) (400 MHz, CDCl<sub>3</sub>) δ = 14.10 (s, 1H), 7.52 (d, *J* = 5.4 Hz, 2H), 7.50 (d, *J* = 5.5 Hz, 2H), 7.42 (s, 1H), 7.32 (d, *J* = 2.5 Hz, 1H), 6.89 (d, *J* = 3.9 Hz, 2H), 5.61 (s, 1H), 3.80 (s, 3H); <sup>13</sup>C NMR (101 MHz, CDCl<sub>3</sub>) δ = 195.2, 163.2, 162.9 (d, *J* = 231.3 Hz), 156.7, 138.1, 130.7 (d, *J* = 7.1 Hz), 130.5, 124.5, 122.0, 121.4 (d, *J* = 22.2 Hz), 115.3 (d, *J* = 22.2 Hz), 114.2, 55.5, 45.8; <sup>19</sup>F NMR (ketone) (376 MHz, CDCl<sub>3</sub>) δ = -110.9; <sup>19</sup>F NMR (enol) (376 MHz, CDCl<sub>3</sub>) δ = -112.5; IR (KBr) (v/cm<sup>-1</sup>): 3276, 3206, 3063, 2934, 2840, 1702, 1664, 1595, 1541, 1512, 1338, 1238, 759, 685; HRMS (ESI) calcd for C<sub>16</sub>H<sub>15</sub>FNO<sub>3</sub> (M+H)<sup>+</sup> 288.1030, found 288.1028.

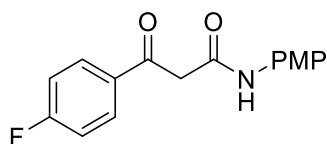

**2r**

**3-(4-Fluorophenyl)-N-(4-methoxyphenyl)-3-oxopropanamide (2r):** Purified by flash column chromatography (petroleum ether/ethyl acetate = 3/1) to give a white solid (1.1 g, 39%). Mp: 149~150 °C;  $^1\text{H}$  NMR (400 MHz,  $\text{CDCl}_3$ )  $\delta$  = 9.03 (s, 1H), 8.07 (dd,  $J$  = 8.7, 5.5 Hz, 2H), 7.46 (d,  $J$  = 9.0 Hz, 2H), 7.18 (t,  $J$  = 8.5 Hz, 2H), 6.86 (d,  $J$  = 8.9 Hz, 2H), 4.06 (s, 2H), 3.79 (s, 3H);  $^{13}\text{C}$  NMR (101 MHz,  $\text{CDCl}_3$ )  $\delta$  = 194.8, 166.5 (d,  $J$  = 257.6 Hz), 163.4, 156.6, 132.5, 131.5 (d,  $J$  = 10.1 Hz), 130.6, 121.98, 116.2 (d,  $J$  = 22.2 Hz), 114.2, 55.5, 45.7;  $^{19}\text{F}$  NMR (376 MHz,  $\text{CDCl}_3$ )  $\delta$  = -102.7; IR (KBr) ( $\text{v}/\text{cm}^{-1}$ ): 3276, 3209, 3067, 2934, 2835, 1690, 1666, 1595, 1538, 1412, 1238, 1159, 758, 685; HRMS (ESI) calcd for  $\text{C}_{16}\text{H}_{15}\text{FNO}_3$  ( $\text{M}+\text{H}$ ) $^+$  288.1030, found 288.1027.

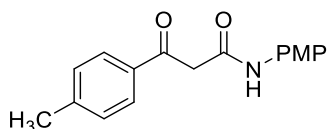

**2s**

**N-(4-Methoxyphenyl)-3-oxo-3-(p-tolyl) propanamide (2s):** Purified by flash column chromatography (petroleum ether/ethyl acetate = 3/1) to give a white solid (1.8 g, 64%). Mp: 146~147 °C;  $^1\text{H}$  NMR (400 MHz,  $\text{CDCl}_3$ )  $\delta$  = 9.22 (s, 1H), 7.97–7.90 (m, 2H), 7.54–7.45 (m, 2H), 7.31 (d,  $J$  = 8.0 Hz, 2H), 6.89–6.83 (m, 2H), 4.07 (s, 2H), 3.79 (s, 3H), 2.44 (s, 3H);  $^{13}\text{C}$  NMR (101 MHz,  $\text{CDCl}_3$ )  $\delta$  = 196.1, 163.9, 156.5, 145.5, 133.7, 130.8, 129.7, 128.8, 122.0, 114.1, 55.5, 45.3, 21.8; IR (KBr) ( $\text{v}/\text{cm}^{-1}$ ): 3284, 3222, 3083, 2965, 2835, 1703, 1652, 1544, 1514, 1412, 1295, 1244, 829, 750; HRMS (ESI) calcd for  $\text{C}_{17}\text{H}_{18}\text{NO}_3$  ( $\text{M}+\text{H}$ ) $^+$  284.1281, found 284.1278.

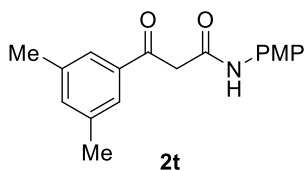

**2t**

**3-(3,5-Dimethylphenyl)-N-(4-methoxyphenyl)-3-oxopropanamide (2t):** Purified by flash column chromatography (petroleum ether/ethyl acetate = 3/1) to give a white solid (1.1 g, 37%). Mp: 126~127 °C;  $^1\text{H}$  NMR (400 MHz,  $\text{CDCl}_3$ )  $\delta$  = 9.21 (s, 1H), 7.62 (d,  $J$  = 8.1 Hz, 2H), 7.51–7.45 (m, 2H), 6.91–6.82 (m, 3H), 4.07 (s, 2H), 3.79 (s, 3H), 2.39 (s, 6H);  $^{13}\text{C}$  NMR (101 MHz,  $\text{CDCl}_3$ )  $\delta$  = 196.7, 164.2, 156.5, 138.6, 136.2, 135.9, 130.9, 126.4, 122.0, 114.1, 55.4, 45.6, 21.2; IR (KBr) ( $\text{v}/\text{cm}^{-1}$ ): 3321, 3136, 3002, 2920, 2859, 1678, 1650, 1605, 1552, 1458, 1336, 1173, 1034, 833; HRMS (ESI) calcd for

C<sub>18</sub>H<sub>20</sub>NO<sub>3</sub> (M+H)<sup>+</sup> 298.1438, found 298.1433.

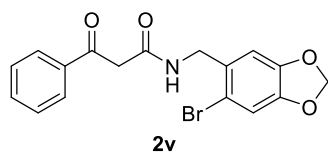

2v

**N-((6-Bromobenzo[*d*][1,3]dioxol-5-yl)methyl)-3-oxo-3-phenylpropanamide (2v):**

Purified by flash column chromatography (DCM/MeOH = 25/1) to give a white solid (0.65 g, 23%, ketone/enolate = 7/1). Mp: 147~148 °C; <sup>1</sup>H NMR (400 MHz, CDCl<sub>3</sub>) δ = 8.00 (q, *J* = 1.7 Hz, 1H), 7.97 (d, *J* = 1.6 Hz, 1H), 7.67 – 7.57 (m, 2H), 7.49 (dd, *J* = 8.4, 7.1 Hz, 2H), 6.99 (d, *J* = 4.1 Hz, 1H), 6.90 (s, 1H), 5.95 (s, 2H), 4.47 (d, *J* = 6.0 Hz, 2H), 3.98 (s, 2H); <sup>13</sup>C NMR (101 MHz, CDCl<sub>3</sub>) δ = 199.71, 163.81, 150.19, 147.49, 138.39, 132.98, 130.28, 128.89, 128.58, 126.18, 114.66, 112.76, 110.19, 101.82, 45.13, 43.83; HRMS (ESI) calcd for C<sub>17</sub>H<sub>14</sub><sup>79</sup>BrNNaO<sub>4</sub> (M+Na)<sup>+</sup> 397.9998, found 397.9995, calcd for C<sub>17</sub>H<sub>14</sub><sup>81</sup>BrNNaO<sub>4</sub> (M+Na)<sup>+</sup> 399.9978, found 399.9976.

### 3. Pd-Catalyzed Allylic Substitution Cascade

#### 3.1 Reaction conditions screening

Table S1. Selection of substrates<sup>a</sup>

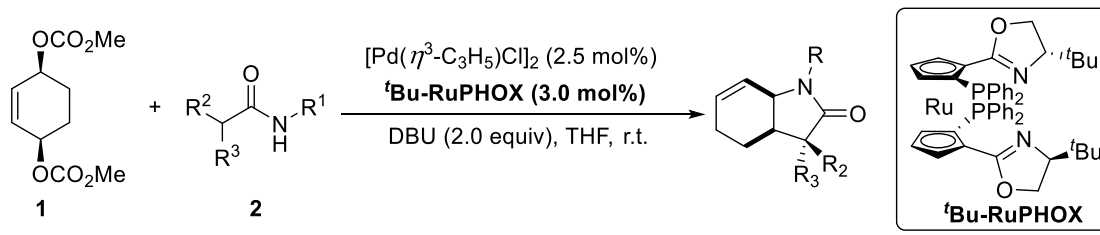

| entry           | R <sup>1</sup>  | R <sup>2</sup>     | R <sup>3</sup> | yield% <sup>b</sup> | ee% <sup>c</sup> | Dr <sup>d</sup> |
|-----------------|-----------------|--------------------|----------------|---------------------|------------------|-----------------|
| 1               | Ts              | CO <sub>2</sub> Et | H              | trace               | -                | -               |
| 2               | Ts              | CO <sub>2</sub> Et | H              | 40                  | -                | -               |
| 3               | Ts              | CO <sub>2</sub> Et | H              | trace               | -                | -               |
| 4               | Bn              | CN                 | H              | trace               | -                | -               |
| 5               | Ph              | Bz                 | F              | 98                  | 89               | 1:1             |
| 6               | Bn              | Bz                 | F              | 98                  | 96/93            | 2:1             |
| 7               | <sup>t</sup> Bu | Bz                 | F              | trace               | -                | -               |
| <b>8</b>        | <b>Ph</b>       | <b>Bz</b>          | <b>H</b>       | <b>93</b>           | <b>97/-</b>      | <b>&gt;20:1</b> |
| 9               | Bn              | Bz                 | H              | 47                  | n.d.             | 3:1             |
| 10 <sup>e</sup> | Ph              | Bz                 | H              | 78                  | 61               | >20:1           |

[a] Unless otherwise noted, the reaction of **1** (0.3 mmol) and **2** (0.20 mmol) was conducted using [Pd( $\eta^3$ -C<sub>3</sub>H<sub>5</sub>)Cl]<sub>2</sub> (2.5 mol%) and <sup>t</sup>Bu-RuPHOX (3.0 mol%) as the chiral catalyst in the presence of DBU (2.0 equiv) in THF (2.0 mL) under a N<sub>2</sub> atmosphere at 25 °C for 3 h; [b] Isolated yield; [c] Determined by HPLC analysis using a chiral Daicel OD-H and OJ columns; [d] Determined by <sup>1</sup>H NMR spectra; [e] Using the *mono*-<sup>t</sup>Bu-RuPHOX (5.95 mg, 5.5 mol%) as chiral ligand.

#### 3.2 General Procedures for Enantioselective Catalysis

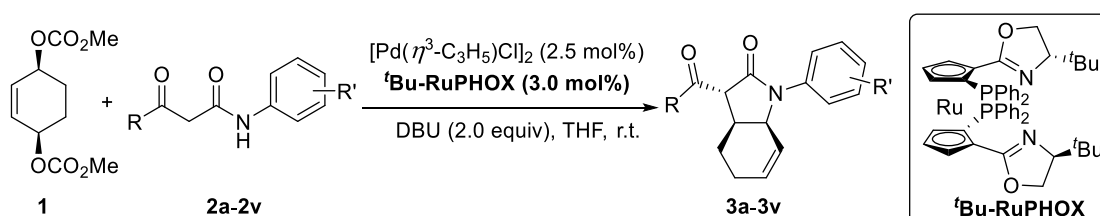

A flame-dried Schlenk tube equipped with a magnetic stirring bar, was charged with a mixture of [Pd( $\eta^3$ -C<sub>3</sub>H<sub>5</sub>)Cl]<sub>2</sub> (1.83 mg, 2.5 mol%) and RuPHOX (5.10 mg, 3.0 mol%). After being evacuated and backfilled with nitrogen three times, THF (2 mL) was added

to the Schlenk tube and the mixture was stirred at room temperature under N<sub>2</sub> atmosphere for 1 h. Allylic biscarbonate **1** (51 mg, 0.22 mmol, 1.1 equiv) was added via a syringe followed by the addition of 3-oxo-*N*,3-diphenylpropanamide **2a-2v** (0.2 mmol, 1.0 equiv) and DBU (0.4 mmol, 2.0 equiv). The reaction mixture was allowed to stir under N<sub>2</sub> atmosphere at room temperature for 3 h. THF was evaporated in vacuo and the residue was purified by flash silica gel column chromatography (petroleum ether/ethyl acetate = 5/1) to give final products **3a-3v**.

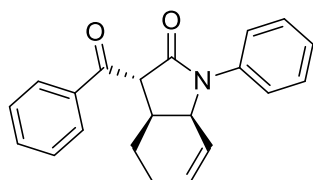

**3a**

**(3R,3aS,7aS)-3-Benzoyl-1-phenyl-1,3,3a,4,5,7a-hexahydro-2H-indol-2-one (3a):** Colorless oil (59 mg, 93%). <sup>1</sup>H NMR (400 MHz, CDCl<sub>3</sub>) δ = 8.18–8.09 (m, 2H), 7.63–7.53 (m, 1H), 7.52–7.46 (m, 3H), 7.45 (d, *J* = 1.2 Hz, 1H), 7.37 (dd, *J* = 8.6, 7.2 Hz, 2H), 7.23–7.15 (m, 1H), 5.99 (dtd, *J* = 10.2, 3.8, 1.3 Hz, 1H), 5.76 (dq, *J* = 10.2, 2.3 Hz, 1H), 4.81 (ddd, *J* = 6.7, 3.3, 1.7 Hz, 1H), 4.46 (d, *J* = 5.8 Hz, 1H), 3.31–3.14 (m, 1H), 2.13 (dh, *J* = 7.5, 3.9 Hz, 2H), 1.96–1.82 (m, 1H), 1.78–1.69 (m, 1H); <sup>13</sup>C NMR (101 MHz, CDCl<sub>3</sub>) δ = 195.5, 169.7, 137.4, 136.6, 133.6, 131.8, 129.5, 129.0, 128.6, 126.4, 123.7, 123.5, 56.8, 55.3, 34.9, 26.1, 21.8; IR (KBr) (v/cm<sup>-1</sup>): 3059, 3026, 2940, 2863, 1752, 1719, 1682, 1536, 1523, 1397, 1271, 744, 693; HRMS (ESI) calcd for C<sub>21</sub>H<sub>20</sub>NO<sub>2</sub> (M+H)<sup>+</sup> 318.1489, found 318.1485; HPLC: 96% *ee*, chiral stationary column: OD-H, mobile phase: hexane/<sup>i</sup>PrOH = 90/10, 1.0 mL/min, 254 nm, 25 °C, *t*<sub>R</sub> (major) = 11.8 min, *t*<sub>R</sub> (minor) = 21.2 min; [α]<sub>D</sub><sup>25</sup> = +51.20 (*c* 1.0, CH<sub>2</sub>Cl<sub>2</sub>).

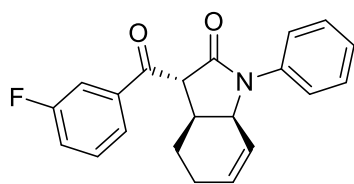

**3b**

**(3S,3aR,7aR)-3-(3-Fluorobenzoyl)-1-phenyl-1,3,3a,4,5,7a-hexahydro-2H-indol-2-one (3b):** Colorless oil (56 mg, 83%). <sup>1</sup>H NMR (400 MHz, CDCl<sub>3</sub>) δ = 7.95 (d, *J* = 7.8 Hz, 1H), 7.82 (ddd, *J* = 9.5, 2.6, 1.6 Hz, 1H), 7.51–7.39 (m, 4H), 7.36–7.18 (m, 3H), 6.06–5.95 (m, 1H), 5.81–5.72 (m, 1H), 4.81 (ddd, *J* = 6.7, 3.3, 1.6 Hz, 1H), 4.39 (d, *J* = 5.9 Hz, 1H), 3.29–3.20 (m, 1H), 2.21–2.07 (m, 2H), 1.92–1.85 (m, 1H), 1.78–1.69 (m, 1H); <sup>13</sup>C NMR (101 MHz, CDCl<sub>3</sub>) δ = 194.3 (d, *J* = 2.5 Hz), 168.7, 162.8 (d, *J* = 249.5 Hz), 138.6 (d, *J* = 6.4 Hz), 137.3, 131.8, 130.2 (d, *J* = 7.6 Hz), 129.1, 126.1, 125.5



(d,  $J = 3.0$  Hz), 123.7, 123.4, 120.6 (d,  $J = 21.2$ ), 116.1 (d,  $J = 22.2$  Hz), 56.6, 54.8 34.7, 23.3, 22.4;  $^{19}\text{F}$  NMR (376 MHz,  $\text{CDCl}_3$ )  $\delta = -111.8$ ; IR (KBr) ( $\text{v}/\text{cm}^{-1}$ ): 3303, 3075, 3038, 2933, 1735, 1707, 1556, 1519, 1459, 1418, 1369, 1271, 829; HRMS (ESI) calcd for  $\text{C}_{21}\text{H}_{19}\text{FNO}_2$  ( $\text{M}+\text{H}$ ) $^+$  336.1394, found 336.1390; HPLC: 91% *ee*, chiral stationary column: OJ-H, mobile phase: hexane/ $i$ PrOH = 80/20, 1.0 mL/min, 254 nm, 25 °C,  $t_{\text{R}}$  (major) = 15.0 min,  $t_{\text{R}}$  (minor) = 45.1 min;  $[\alpha]_{\text{D}}^{25} = +31.24$  ( $c$  1.0,  $\text{CH}_2\text{Cl}_2$ ).

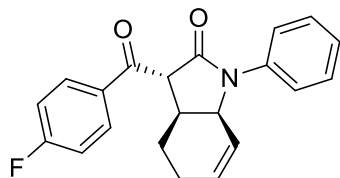

**3c**

**(3S,3aR,7aR)-3-(4-Fluorobenzoyl)-1-phenyl-1,3,3a,4,5,7a-hexahydro-2H-indol-2-one (3c):** Colorless oil (57 mg, 87%).  $^1\text{H}$  NMR (400 MHz,  $\text{CDCl}_3$ )  $\delta = 8.22$ – $8.15$  (m, 2H), 7.47–7.33 (m, 4H), 7.23–7.12 (m, 3H), 6.05–5.94 (m, 1H), 5.80–5.70 (m, 1H), 4.81 (ddd,  $J = 6.8, 3.3, 1.7$  Hz, 1H), 4.39 (d,  $J = 5.8$  Hz, 1H), 3.30–3.20 (m, 1H), 2.17–2.10 (m, 2H), 1.91–1.84 (m, 1H), 1.77–1.69 (m, 1H);  $^{13}\text{C}$  NMR (101 MHz,  $\text{CDCl}_3$ )  $\delta = 193.7, 168.8, 166.1$  (d,  $J = 256.5$  Hz), 137.3, 130.0 (d,  $J = 3.0$  Hz), 132.4 (d,  $J = 9.3$  Hz), 131.8, 129.0, 126.1, 123.7, 123.4, 115.7 (d,  $J = 22.2$  Hz), 56.4, 56.0, 34.6, 23.3, 22.4;  $^{19}\text{F}$  NMR (376 MHz,  $\text{CDCl}_3$ )  $\delta = -104.1$ ; IR (KBr) ( $\text{v}/\text{cm}^{-1}$ ): 3332, 3075, 3038, 2928, 2851, 1682, 1674, 1601, 1503, 1380, 1281, 1218, 754, 693; HRMS (ESI) calcd for  $\text{C}_{21}\text{H}_{19}\text{FNO}_2$  ( $\text{M}+\text{H}$ ) $^+$  336.1394, found 336.1391; HPLC: 96% *ee*, chiral stationary column: OJ-H, mobile phase: hexane/ $i$ PrOH = 90/10, 1.0 mL/min, 254 nm, 25 °C,  $t_{\text{R}}$  (major) = 35.9 min,  $t_{\text{R}}$  (minor) = 91.7 min;  $[\alpha]_{\text{D}}^{25} = +33.60$  ( $c$  1.0,  $\text{CH}_2\text{Cl}_2$ ).

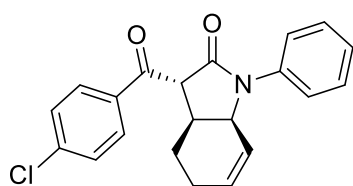

**3d**

**(3S,3aR,7aR)-3-(4-Chlorobenzoyl)-1-phenyl-1,3,3a,4,5,7a-hexahydro-2H-indol-2-one (3d):** Colorless oil (58 mg, 83%).  $^1\text{H}$  NMR (400 MHz,  $\text{CDCl}_3$ )  $\delta = 8.09$  (d,  $J = 8.6$  Hz, 2H), 7.51–7.33 (m, 6H), 7.24 (d,  $J = 14.6$  Hz, 1H), 6.06–5.96 (m, 1H), 5.82–5.71 (m, 1H), 4.80 (ddd,  $J = 6.8, 3.3, 1.7$  Hz, 1H), 4.38 (d,  $J = 5.8$  Hz, 1H), 3.32–3.18 (m, 1H), 2.23–2.07 (m, 2H), 1.91–1.84 (m, 1H), 1.77–1.70 (m, 1H);  $^{13}\text{C}$  NMR (101 MHz,  $\text{CDCl}_3$ )  $\delta = 194.2, 168.8, 140.2, 137.3, 134.9, 131.8, 131.0, 129.1, 128.9, 126.1, 123.7, 123.4, 56.4, 56.0, 34.6, 23.3, 22.4$ ; IR (KBr) ( $\text{v}/\text{cm}^{-1}$ ): 3315, 3071, 3034, 2932, 2871, 1703, 1674, 1585, 1510, 1397, 1177, 1090, 821, 752; HRMS (ESI) calcd for  $\text{C}_{21}\text{H}_{19}^{35}\text{ClNO}_2$

(M+H)<sup>+</sup> 352.1099, found 352.1097, calcd for C<sub>21</sub>H<sub>19</sub><sup>37</sup>ClNO<sub>2</sub> (M+H)<sup>+</sup> 354.1070, found 354.1063; HPLC: 94% *ee*, chiral stationary column: OD-H, mobile phase: hexane/<sup>i</sup>PrOH = 90/10, 1.0 mL/min, 254 nm, 25 °C, t<sub>R</sub> (major) = 11.9 min, t<sub>R</sub> (minor) = 24.2 min; [α]<sub>D</sub><sup>25</sup> = +29.20 (*c* 0.5, CH<sub>2</sub>Cl<sub>2</sub>).

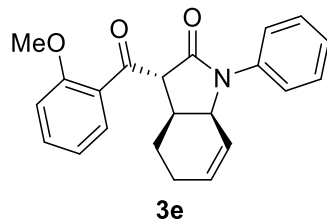

**(3*S*,3*aR*,7*aR*)-3-(2-Methoxybenzoyl)-1-phenyl-1,3,3*a*,4,5,7*a*-hexahydro-2*H*-indol-2-one (3e):** Colorless oil (37 mg, 54%). <sup>1</sup>H NMR (400 MHz, CDCl<sub>3</sub>) δ = 7.64 (dd, *J* = 7.7, 1.8 Hz, 1H), 7.41 (td, *J* = 9.0, 8.5, 1.5 Hz, 3H), 7.33–7.26 (m, 2H), 7.12 (t, *J* = 7.4 Hz, 1H), 6.99–6.89 (m, 2H), 5.94–5.88 (m, 1H), 5.68–5.62 (m, 1H), 4.65 (ddd, *J* = 6.8, 3.3, 1.7 Hz, 1H), 4.55 (d, *J* = 6.2 Hz, 1H), 3.84 (s, 3H), 3.06–2.99 (m, 1H), 2.20–2.00 (m, 2H), 1.89–1.69 (m, 2H); <sup>13</sup>C NMR (101 MHz, CDCl<sub>3</sub>) δ = 198.9, 170.4, 158.4, 137.7, 134.0, 131.6, 130.9, 129.0, 128.3, 125.8, 123.7, 123.7, 121.0, 111.5, 59.8, 55.8, 55.7, 35.2, 23.6, 22.5; IR (KBr) (v/cm<sup>-1</sup>): 3356, 3063, 3031, 2924, 2853, 1711, 1704, 1599, 1500, 1463, 1378, 1218, 1017, 756; HRMS (ESI) calcd for C<sub>22</sub>H<sub>22</sub>NO<sub>3</sub> (M+H)<sup>+</sup> 348.1594, found 348.1591; HPLC: 94% *ee*, chiral stationary column: OJ-H, mobile phase: hexane/<sup>i</sup>PrOH = 80/20, 1.0 mL/min, 254 nm, 25 °C, t<sub>R</sub> (major) = 19.5 min, t<sub>R</sub> (minor) = 57.2 min; [α]<sub>D</sub><sup>25</sup> = +45.20 (*c* 1.0, CH<sub>2</sub>Cl<sub>2</sub>).

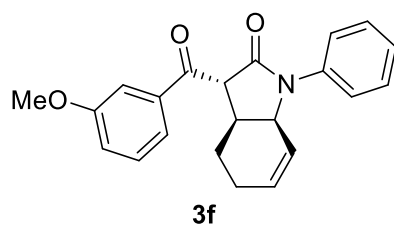

**(3*S*,3*aR*,7*aR*)-3-(3-Methoxybenzoyl)-1-phenyl-1,3,3*a*,4,5,7*a*-hexahydro-2*H*-indol-2-one (3f):** Colorless oil (60 mg, 88%). <sup>1</sup>H NMR (400 MHz, CDCl<sub>3</sub>) δ = 7.73 (d, *J* = 7.8 Hz, 1H), 7.67–7.63 (m, 1H), 7.48–7.35 (m, 5H), 7.21 (d, *J* = 7.3 Hz, 1H), 7.14 (dd, *J* = 7.8, 3.1 Hz, 1H), 6.03–5.96 (m, 1H), 5.79–5.72 (m, 1H), 4.80 (ddd, *J* = 6.8, 3.3, 1.6 Hz, 1H), 4.43 (d, *J* = 5.6 Hz, 1H), 3.87 (s, 3H), 3.24–3.14 (m, 1H), 2.22–2.10 (m, 2H), 1.93–1.85 (m, 1H), 1.79–1.70 (m, 1H); <sup>13</sup>C NMR (101 MHz, CDCl<sub>3</sub>) δ = 195.5, 169.2, 159.8, 138.0, 137.4, 131.8, 129.6, 129.0, 126.0, 123.8, 123.5, 122.3, 120.4, 113.3, 56.6, 56.0, 55.5, 35.1, 23.4, 22.5; IR (KBr) (v/cm<sup>-1</sup>): 3319, 3063, 3042, 2922, 2855, 1674, 1642, 1544, 1271, 1179, 1090, 1034, 744; HRMS (ESI) calcd for C<sub>22</sub>H<sub>22</sub>NO<sub>3</sub> (M+H)<sup>+</sup> 348.1594, found 348.1589; HPLC: 98% *ee*, chiral stationary column: OJ-H, mobile

phase: hexane/<sup>i</sup>PrOH = 80/20, 1.0 mL/min, 254 nm, 25 °C,  $t_R$  (major) = 22.4 min,  $t_R$  (minor) = 60.7 min;  $[\alpha]_D^{25} = +47.40$  ( $c$  1.0, CH<sub>2</sub>Cl<sub>2</sub>).

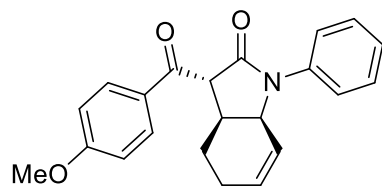

**3g**

**(3S,3aR,7aR)-3-(4-Methoxybenzoyl)-1-phenyl-1,3,3a,4,5,7a-hexahydro-2H-indol-2-one (3g):** Colorless oil (45 mg, 64%). <sup>1</sup>H NMR (400 MHz, CDCl<sub>3</sub>)  $\delta$  = 8.15–8.09 (m, 2H), 7.45 (dd,  $J$  = 8.6, 1.3 Hz, 2H), 7.40–7.33 (m, 2H), 7.22–7.17 (m, 1H), 6.99–6.94 (m, 2H), 6.02–5.96 (m, 1H), 5.78–5.72 (m, 1H), 4.80 (ddd,  $J$  = 6.8, 3.3, 1.7 Hz, 1H), 4.39 (d,  $J$  = 5.6 Hz, 1H), 3.87 (s, 3H), 3.26–3.17 (m, 1H), 2.19–2.06 (m, 2H), 1.93–1.84 (m, 1H), 1.78–1.73 (m, 1H); <sup>13</sup>C NMR (101 MHz, CDCl<sub>3</sub>)  $\delta$  = 193.8, 169.4, 164.0, 137.5, 131.9, 131.8, 129.6, 129.0, 125.9, 123.8, 123.5, 113.8, 56.2, 56.0, 55.6, 34.9, 23.4, 22.5; IR (KBr) ( $\nu/\text{cm}^{-1}$ ): 3332, 3075, 3030, 2932, 2845, 1703, 1674, 1605, 1493, 1382, 1267, 1169, 1028, 752; HRMS (ESI) calcd for C<sub>22</sub>H<sub>22</sub>NO<sub>3</sub> (M+H)<sup>+</sup> 348.1594, found 348.1590. HPLC: 96% *ee*, chiral stationary column: OD-H, mobile phase: hexane/<sup>i</sup>PrOH = 80/20, 1.0 mL/min, 254 nm, 25 °C,  $t_R$  (major) = 11.9 min,  $t_R$  (minor) = 33.5 min;  $[\alpha]_D^{25} = +29.20$  ( $c$  0.5, CH<sub>2</sub>Cl<sub>2</sub>).

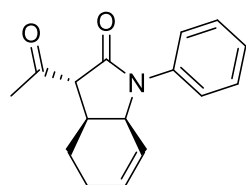

**3h**

**(3S,3aR,7aR)-3-Acetyl-1-phenyl-1,3,3a,4,5,7a-hexahydro-2H-indol-2-one (3h):** Colorless oil (37 mg, 73%). <sup>1</sup>H NMR (400 MHz, CDCl<sub>3</sub>)  $\delta$  = 7.45–7.35 (m, 4H), 7.25–7.18 (m, 1H), 5.98–5.92 (m, 1H), 5.69 (dq,  $J$  = 10.2, 2.3 Hz, 1H), 4.67–4.62 (m,  $J$  = 6.5, 3.2, 1.7 Hz, 1H), 3.58 (d,  $J$  = 6.9 Hz, 1H), 3.16–3.08 (m, 1H), 2.46 (s, 3H), 2.13–2.06 (m, 2H), 1.85–1.76 (m, 2H), 1.74–1.76 (m, 1H); <sup>13</sup>C NMR (101 MHz, CDCl<sub>3</sub>)  $\delta$  = 203.4, 168.7, 137.3, 131.6, 129.1, 126.1, 123.6, 123.4, 60.6, 55.9, 32.8, 30.4, 22.9, 21.9; IR (KBr) ( $\nu/\text{cm}^{-1}$ ): 3319, 3079, 3030, 2924, 2847, 1686, 1599, 1510, 1457, 1267, 1090, 1032, 748; HRMS (ESI) calcd for C<sub>16</sub>H<sub>18</sub>NO<sub>2</sub> (M+H)<sup>+</sup> 256.1332, found 256.1329; HPLC: 95% *ee*, chiral stationary column: OJ, mobile phase: hexane/<sup>i</sup>PrOH = 80/20, 1.0 mL/min, 254 nm, 25 °C,  $t_R$  (major) = 14.8 min,  $t_R$  (minor) = 35.4 min;  $[\alpha]_D^{25} = +112.72$  ( $c$  1.0, CH<sub>2</sub>Cl<sub>2</sub>).

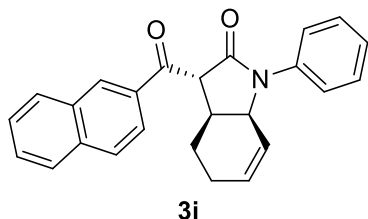

**(3*S*,3*a**R*,7*a**R*)-3-(2-Naphthoyl)-1-phenyl-1,3,3*a*,4,5,7*a*-hexahydro-2*H*-indol-2-one (3i):** Colorless oil (72 mg, 98%). <sup>1</sup>H NMR (400 MHz, CDCl<sub>3</sub>)  $\delta$  = 8.73 (s, 1H), 8.14 (dd,  $J$  = 8.7, 1.7 Hz, 1H), 8.03 (d,  $J$  = 8.0 Hz, 1H), 7.90 (dd,  $J$  = 14.4, 8.4 Hz, 2H), 7.65–7.53 (m, 2H), 7.50–7.44 (m, 2H), 7.38 (t,  $J$  = 7.9 Hz, 2H), 7.24–7.17 (m, 1H), 6.07–6.00 (m, 1H), 5.83–5.76 (m, 1H), 4.86 (ddd,  $J$  = 6.9, 3.4, 1.7 Hz, 1H), 4.61 (d,  $J$  = 5.5 Hz, 1H), 3.34–3.24 (m, 1H), 2.25–2.09 (m, 2H), 1.97–1.89 (m, 1H), 1.83–1.74 (m, 1H); <sup>13</sup>C NMR (101 MHz, CDCl<sub>3</sub>)  $\delta$  = 195.4, 169.2, 137.4, 135.8, 133.9, 132.5, 132.2, 131.9, 130.0, 129.0, 128.8, 128.4, 127.7, 126.8, 126.0, 124.5, 123.8, 123.5, 56.6, 56.0, 35.1, 23.5, 22.6; IR (KBr) (v/cm<sup>-1</sup>): 3344, 3067, 3030, 2930, 2867, 1700, 1672, 1601, 1542, 1455, 1370, 1277, 1175, 746; HRMS (ESI) calcd for C<sub>25</sub>H<sub>22</sub>NO<sub>2</sub> (M+H)<sup>+</sup> 368.1645, found 368.1642; HPLC: 94% *ee*, chiral stationary column: OJ-H, mobile phase: hexane/<sup>i</sup>PrOH = 80/20, 1.0 mL/min, 254 nm, 25 °C,  $t_R$  (major) = 23.1 min,  $t_R$  (minor) = 44.4 min;  $[\alpha]_D^{25}$  = +1.28 (*c* 0.5, CH<sub>2</sub>Cl<sub>2</sub>).

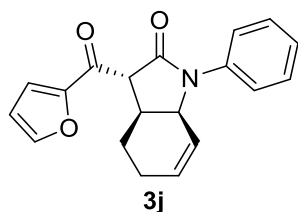

**(3*S*,3*a**R*,7*a**R*)-3-(Furan-2-carbonyl)-1-phenyl-1,3,3*a*,4,5,7*a*-hexahydro-2*H*-indol-2-one (3j):** Colorless oil (48 mg, 78%). <sup>1</sup>H NMR (400 MHz, CDCl<sub>3</sub>)  $\delta$  = 7.67 (d,  $J$  = 1.6 Hz, 1H), 7.50–7.34 (m, 5H), 7.23–7.16 (m, 1H), 6.59 (dd,  $J$  = 3.6, 1.7 Hz, 1H), 6.03–5.95 (m, 1H), 5.75 (dq,  $J$  = 10.2, 2.2 Hz, 1H), 4.82–4.76 (m, 1H), 4.25 (d,  $J$  = 6.7 Hz, 1H), 3.28–3.19 (m, 1H), 2.25–2.06 (m, 2H), 1.92–1.84 (m, 1H), 1.79–1.70 (m, 1H); <sup>13</sup>C NMR (101 MHz, CDCl<sub>3</sub>)  $\delta$  = 184.0, 169.0, 152.4, 147.5, 137.5, 131.5, 129.1, 125.9, 123.5, 123.5, 120.0, 112.7, 56.2, 56.1, 34.4, 23.1, 22.1; IR (KBr) (v/cm<sup>-1</sup>): 3340, 3063, 3042, 2928, 2855, 1753, 1716, 1702, 1680, 1540, 1337, 1173, 756; HRMS (ESI) calcd for C<sub>19</sub>H<sub>18</sub>NO<sub>3</sub> (M+H)<sup>+</sup> 308.1281, found 308.1277; HPLC: 96% *ee*, chiral stationary column: OJ-H, mobile phase: hexane/<sup>i</sup>PrOH = 70/30, 1.0 mL/min, 254 nm, 25 °C,  $t_R$  (major) = 26.9 min,  $t_R$  (minor) = 93.2 min;  $[\alpha]_D^{25}$  = +65.12 (*c* 0.5, CH<sub>2</sub>Cl<sub>2</sub>).

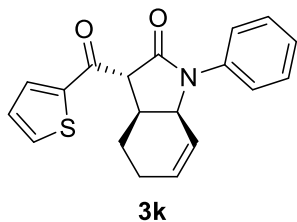

**(3*S*,3*aR*,7*aR*)-1-Phenyl-3-(Thiophene-2-carbonyl)-1,3,3*a*,4,5,7*a*-hexahydro-2*H*-indol-2-one (3k):** Colorless oil (52 mg, 81%). <sup>1</sup>H NMR (400 MHz, CDCl<sub>3</sub>)  $\delta$  = 8.00 (dd,  $J$  = 3.9, 1.1 Hz, 1H), 7.71 (dd,  $J$  = 5.0, 1.1 Hz, 1H), 7.48–7.42 (m, 2H), 7.41–7.34 (m, 2H), 7.23–7.16 (m, 2H), 6.03–5.97 (m, 1H), 5.79–5.73 (m, 1H), 4.84–4.79 (m, 1H), 4.23 (d,  $J$  = 5.7 Hz, 1H), 3.29–3.21 (m, 1H), 2.20–2.13 (m, 2H), 1.92–1.84 (m, 1H), 1.80–1.71 (m, 1H); <sup>13</sup>C NMR (101 MHz, CDCl<sub>3</sub>)  $\delta$  = 187.9, 168.7, 143.9, 137.4, 135.1, 134.8, 131.8, 129.0, 128.5, 126.0, 123.7, 123.4, 57.7, 56.1, 34.7, 23.3, 22.4; IR (KBr) ( $\nu/\text{cm}^{-1}$ ): 3352, 3063, 3010, 2926, 2859, 1698, 1645, 1538, 1508, 1463, 1263, 746; HRMS (ESI) calcd for C<sub>19</sub>H<sub>18</sub>NO<sub>2</sub>S (M+H)<sup>+</sup> 324.1053, found 324.1049; HPLC: 94% *ee*, chiral stationary column: OJ-H, mobile phase: hexane/*i*PrOH = 80/20, 1.0 mL/min, 254 nm, 25 °C,  $t_R$  (major) = 30.3 min,  $t_R$  (minor) = 89.9 min;  $[\alpha]_D^{25}$  = +38.88 ( $c$  0.25, CH<sub>2</sub>Cl<sub>2</sub>).

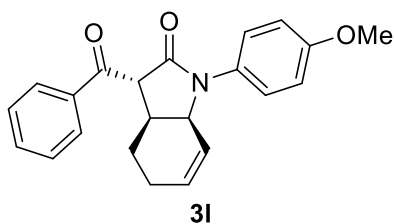

**(3*S*,3*aR*,7*aR*)-3-Benzoyl-1-(4-methoxyphenyl)-1,3,3*a*,4,5,7*a*-hexahydro-2*H*-indol-2-one (3l):** Colorless solid (57 mg, 82%). Mp 105~106 °C; <sup>1</sup>H NMR (400 MHz, CDCl<sub>3</sub>)  $\delta$  = 8.06–8.03 (m, 2H), 7.52–7.46 (m, 1H), 7.43–7.36 (m, 2H), 7.25–7.20 (m, 2H), 6.84–6.78 (m, 2H), 5.94–5.86 (m, 1H), 5.62–5.56 (m, 1H), 4.60 (ddd,  $J$  = 5.2, 3.6, 1.7 Hz, 1H), 4.33 (d,  $J$  = 5.1 Hz, 1H), 3.69 (s, 3H), 3.10–3.02 (m, 1H), 2.13–1.98 (m, 2H), 1.84–1.58 (m, 2H); <sup>13</sup>C NMR (101 MHz, CDCl<sub>3</sub>)  $\delta$  = 195.8, 169.2, 157.9, 136.5, 133.6, 131.7, 130.2, 129.5, 128.6, 126.0, 123.6, 114.3, 56.6, 56.4, 55.5, 35.2, 23.6, 22.7; IR (KBr) ( $\nu/\text{cm}^{-1}$ ): 3336, 3079, 3039, 2934, 2843, 1710, 1668, 1514, 1273, 1177, 1040, 746; HRMS (ESI) calcd for C<sub>22</sub>H<sub>22</sub>NO<sub>3</sub> (M+H)<sup>+</sup> 348.1594, found 348.1591; HPLC: 97% *ee*, chiral stationary column: OJ-H, mobile phase: hexane/*i*PrOH = 80/20, 1.0 mL/min, 254 nm, 25 °C,  $t_R$  (major) = 20.8 min,  $t_R$  (minor) = 61.2 min;  $[\alpha]_D^{25}$  = +50.68 ( $c$  1.0, CH<sub>2</sub>Cl<sub>2</sub>).

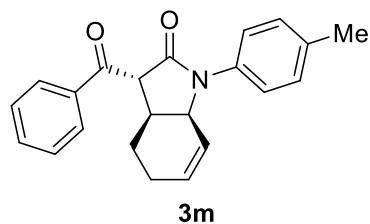

**(3S,3aR,7aR)-3-Benzoyl-1-(p-tolyl)-1,3,3a,4,5,7a-hexahydro-2H-indol-2-one (3m):** Colorless oil (50 mg, 75%). <sup>1</sup>H NMR (400 MHz, CDCl<sub>3</sub>)  $\delta$  = 8.16–8.11 (m, 2H), 7.59 (t,  $J$  = 7.4 Hz, 1H), 7.49 (t,  $J$  = 7.7 Hz, 2H), 7.31 (d,  $J$  = 8.4 Hz, 2H), 7.17 (d,  $J$  = 8.1 Hz, 2H), 6.02–5.95 (m, 1H), 5.73 (dq,  $J$  = 10.2, 2.4 Hz, 1H), 4.75 (ddd,  $J$  = 6.7, 3.3, 1.7 Hz, 1H), 4.43 (d,  $J$  = 5.6 Hz, 1H), 3.23–3.16 (m, 1H), 2.32 (s, 3H), 2.17–2.09 (m, 2H), 1.92–1.70 (m, 2H); <sup>13</sup>C NMR (101 MHz, CDCl<sub>3</sub>)  $\delta$  = 195.7, 169.1, 136.6, 135.9, 134.8, 133.6, 131.6, 129.6, 129.5, 128.6, 123.9, 123.6, 56.4, 56.1, 35.0, 23.5, 22.5, 21.0; IR (KBr) (v/cm<sup>-1</sup>): 3344, 3067, 3037, 2932, 2861, 1704, 1678, 1607, 1516, 1441, 1384, 1279, 1218, 823; HRMS (ESI) calcd for C<sub>22</sub>H<sub>22</sub>NO<sub>2</sub> (M+H)<sup>+</sup> 332.1645, found 332.1640; HPLC: 98% *ee*, chiral stationary column: OJ-H, mobile phase: hexane/<sup>i</sup>PrOH = 90/10, 1.0 mL/min, 254 nm, 25 °C,  $t_R$  (major) = 22.8 min,  $t_R$  (minor) = 68.6 min;  $[\alpha]_D^{25}$  = +43.84 (*c* 1.0, CH<sub>2</sub>Cl<sub>2</sub>).

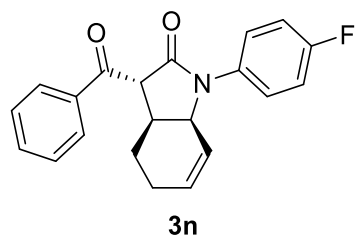

**(3S,3aR,7aR)-3-Benzoyl-1-(4-fluorophenyl)-1,3,3a,4,5,7a-hexahydro-2H-indol-2-one (3n):** Colorless oil (58 mg, 86%). <sup>1</sup>H NMR (400 MHz, CDCl<sub>3</sub>)  $\delta$  = 8.08–8.02 (m, 2H), 7.55–7.48 (m, 1H), 7.42 (t,  $J$  = 7.7 Hz, 2H), 7.34–7.28 (m, 2H), 6.99 (t,  $J$  = 8.6 Hz, 2H), 5.98–5.90 (m, 1H), 5.65–5.58 (m, 1H), 4.66 (ddd,  $J$  = 6.8, 3.4, 1.7 Hz, 1H), 4.35 (d,  $J$  = 5.2 Hz, 1H), 3.14–3.04 (m, 1H), 2.16–1.98 (m, 2H), 1.85–1.77 (m, 1H), 1.69–1.62 (m, 1H); <sup>13</sup>C NMR (101 MHz, CDCl<sub>3</sub>)  $\delta$  = 196.5, 169.4, 160.6 (d,  $J$  = 246.4 Hz), 136.4, 133.7, 133.3 (d,  $J$  = 4.0 Hz), 132.1, 129.4, 128.6, 126.0 (d,  $J$  = 9.1 Hz), 123.2, 115.9 (d,  $J$  = 23.2 Hz), 56.5, 56.2, 35.1, 23.5, 22.6; <sup>19</sup>F NMR (376 MHz, CDCl<sub>3</sub>)  $\delta$  = -115.57; IR (KBr) (v/cm<sup>-1</sup>): 3356, 3071, 3023, 2932, 2853, 1707, 1668, 1512, 1451, 1380, 1248, 1208, 1028, 748; HRMS (ESI) calcd for C<sub>21</sub>H<sub>19</sub>FNO<sub>2</sub> (M+H)<sup>+</sup> 336.1394, found 336.1391; HPLC: 96% *ee*, chiral stationary column: OJ-H, mobile phase: hexane/<sup>i</sup>PrOH = 90/10, 1.0 mL/min, 254 nm, 25 °C,  $t_R$  (major) = 28.2 min,  $t_R$  (minor) = 75.5 min;  $[\alpha]_D^{25}$  = +44.92 (*c* 1.0, CH<sub>2</sub>Cl<sub>2</sub>).

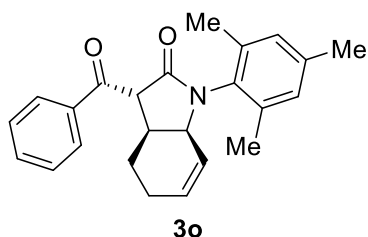

**(3*S*,3*aR*,7*aR*)-3-Benzoyl-1-mesityl-1,3,3*a*,4,5,7*a*-hexahydro-2*H*-indol-2-one (3o):** Colorless oil (63 mg, 88%). <sup>1</sup>H NMR (400 MHz, CDCl<sub>3</sub>)  $\delta$  = 8.09–8.05 (m, 2H), 7.54–7.47 (m, 1H), 7.41 (t, *J* = 7.7 Hz, 2H), 6.80 (s, 2H), 5.95–5.87 (m, 1H), 5.34–5.28 (m, 1H), 4.62–4.56 (m, 1H), 4.28 (d, *J* = 2.3 Hz, 1H), 2.97–2.88 (m, 1H), 2.18 (s, 3H), 2.14 (s, 3H), 2.10 (s, 3H), 2.08–1.93 (m, 2H), 1.87–1.80 (m, 1H), 1.69–1.78 (m, 1H); <sup>13</sup>C NMR (101 MHz, CDCl<sub>3</sub>)  $\delta$  = 196.4, 168.8, 137.9, 137.3, 136.3, 135.9, 133.6, 132.0, 131.3, 129.5, 129.4, 129.2, 128.6, 123.2, 58.5, 55.7, 36.8, 24.9, 23.7, 21.0, 18.9, 17.9; IR (KBr) ( $\nu$ /cm<sup>-1</sup>): 3340, 3033, 2922, 2853, 2859, 1700, 1672, 1597, 1516, 1449, 1396, 1218, 1179, 687; HRMS (ESI) calcd for C<sub>24</sub>H<sub>26</sub>NO<sub>2</sub> (M+H)<sup>+</sup> 360.1958, found 360.1955; HPLC: 94% *ee*, chiral stationary column: IA, mobile phase: hexane/<sup>i</sup>PrOH = 95.0/5.0, 1.0 mL/min, 254 nm, 25 °C, *t<sub>R</sub>* (major) = 18.5 min, *t<sub>R</sub>* (minor) = 21.5 min;  $[\alpha]_D^{25}$  = +83.92 (*c* 1.0, CH<sub>2</sub>Cl<sub>2</sub>).

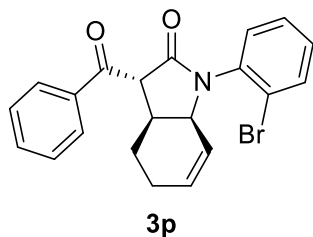

**(3*S*,3*aR*,7*aR*)-3-Benzoyl-1-(2-bromophenyl)-1,3,3*a*,4,5,7*a*-hexahydro-2*H*-indol-2-one (3p):** Colorless solid (78 mg, 98%). Mp: 125–126 °C; <sup>1</sup>H NMR (400 MHz, CDCl<sub>3</sub>)  $\delta$  = 7.64–7.52 (m, 2H), 7.47 (t, *J* = 7.6 Hz, 2H), 7.32 (td, *J* = 7.7, 1.5 Hz, 1H), 7.26–7.13 (m, 2H), 6.00 (dt, *J* = 9.2, 3.7 Hz, 1H), 5.47–5.38 (m, 1H), 4.76 (t, *J* = 5.0 Hz, 1H), 4.34 (d, *J* = 3.7 Hz, 1H), 3.23–3.02 (m, 1H), 2.24–2.03 (m, 2H), 1.89–1.75 (m, 2H); <sup>13</sup>C NMR (101 MHz, CDCl<sub>3</sub>)  $\delta$  = 195.1, 168.9, 136.3, 136.0, 133.6, 133.5, 132.2, 130.4, 129.6, 129.5, 128.5, 128.1, 123.3, 123.1, 57.2, 56.4, 36.0, 23.1; IR (KBr) ( $\nu$ /cm<sup>-1</sup>): 3311, 3067, 3030, 2930, 2859, 1700, 1670, 1510, 1475, 1390, 1216, 1036, 839; HRMS (ESI) calcd for C<sub>21</sub>H<sub>19</sub><sup>79</sup>BrNO<sub>2</sub> (M+H)<sup>+</sup> 396.0594, found 396.0592, calcd for C<sub>21</sub>H<sub>19</sub><sup>81</sup>BrNO<sub>2</sub> (M+H)<sup>+</sup> 398.0574, found 398.0570; HPLC: 94% *ee*, chiral stationary column: OD-H, mobile phase: hexane/<sup>i</sup>PrOH = 90.0/10.0, 1.0 mL/min, 254 nm, 25 °C, *t<sub>R</sub>* (major) = 12.5 min, *t<sub>R</sub>* (minor) = 19.1 min;  $[\alpha]_D^{25}$  = +59.80 (*c* 1.0, CH<sub>2</sub>Cl<sub>2</sub>).

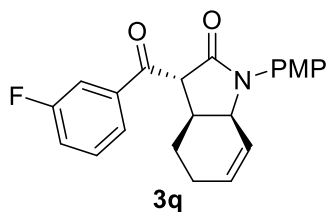

**(3S,3aR,7aR)-3-(3-Fluorobenzoyl)-1-(4-methoxyphenyl)-1,3,3a,4,5,7a-hexahydro-2H-indol-2-one (3q):** Colorless oil (61 mg, 84%). <sup>1</sup>H NMR (400 MHz, CDCl<sub>3</sub>)  $\delta$  = 7.87 (d,  $J$  = 7.8 Hz, 1H), 7.77–7.72 (m, 1H), 7.44–7.35 (m, 1H), 7.24–7.18 (m, 3H), 6.85–6.79 (m, 2H), 5.96–5.89 (m, 1H), 5.65–5.58 (m, 1H), 4.62 (ddd,  $J$  = 6.8, 3.3, 1.7 Hz, 1H), 4.27 (d,  $J$  = 5.3 Hz, 1H), 3.71 (s, 3H), 3.15–3.07 (m, 1H), 2.14–1.98 (m, 2H), 1.83–1.76 (m, 1H), 1.69–1.62 (m, 1H); <sup>13</sup>C NMR (101 MHz, CDCl<sub>3</sub>)  $\delta$  = 194.5 (d,  $J$  = 2.3 Hz), 168.7, 162.8 (d,  $J$  = 248.5 Hz), 157.9, 138.6 (d,  $J$  = 6.4 Hz), 131.7, 130.2 (d,  $J$  = 7.6 Hz), 130.02, 126.0, 125.4 (d,  $J$  = 2.9 Hz), 123.6, 120.6 (d,  $J$  = 22.2 Hz), 116.1 (d,  $J$  = 22.2 Hz), 114.3, 56.8, 56.4, 55.5, 35.0, 29.7, 23.5, 22.6; <sup>19</sup>F NMR (376 MHz, CDCl<sub>3</sub>)  $\delta$  = –112.0; IR (KBr) (v/cm<sup>–1</sup>): 3340, 3071, 3031, 2924, 2853, 1696, 1681, 1587, 1514, 1443, 1392, 1271, 1032, 748; HRMS (ESI) calcd for C<sub>22</sub>H<sub>21</sub>FNO<sub>3</sub> (M+H)<sup>+</sup> 366.1500, found 366.1496; HPLC: 95% *ee*, chiral stationary column: OJ-H, mobile phase: hexane/<sup>i</sup>PrOH = 80/20, 1.0 mL/min, 254 nm, 25 °C,  $t_R$  (major) = 16.6min,  $t_R$  (minor) = 58.7 min;  $[\alpha]_D^{25}$  = +38.52 (*c* 1.0, CH<sub>2</sub>Cl<sub>2</sub>).

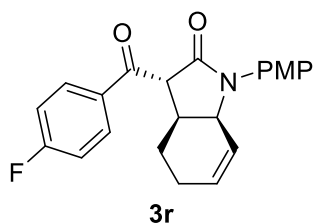

**(3S,3aR,7aR)-3-(4-Fluorobenzoyl)-1-(4-methoxyphenyl)-1,3,3a,4,5,7a-hexahydro-2H-indol-2-one(3r):** Colorless solid (70 mg, 96%). Mp: 146~147 °C; <sup>1</sup>H NMR (400 MHz, CDCl<sub>3</sub>)  $\delta$  = 8.15–8.08 (m, 2H), 7.23–7.18 (m, 2H), 7.12–7.04 (m, 2H), 6.85–6.80 (m, 2H), 5.95–5.89 (m, 1H), 5.64–5.59 (m, 1H), 4.64–4.59(m, 1H), 4.27 (d,  $J$  = 5.1 Hz, 1H), 3.71 (s, 3H), 3.17–3.08 (m, 1H), 2.11–2.02 (m, 2H), 1.82–1.75 (m, 1H), 1.68–1.59 (m, 1H); <sup>13</sup>C NMR (101 MHz, CDCl<sub>3</sub>)  $\delta$  = 193.9, 168.9, 166.1 (d,  $J$  = 257.6 Hz), 157.9, 133.0 (d,  $J$  = 2.9 Hz), 132.4 (d,  $J$  = 9.1 Hz), 131.8, 130.1, 125.9, 123.6, 115.7 (d,  $J$  = 22.2 Hz), 114.3, 56.7, 56.5, 55.5, 34.9, 23.6, 22.6; <sup>19</sup>F NMR (376 MHz, CDCl<sub>3</sub>)  $\delta$  = –104.37; IR (KBr) (v/cm<sup>–1</sup>): 3368, 3067, 3051, 2926, 2849, 1696, 1676, 1599, 1514, 1455, 1392, 1252, 1034, 833; HRMS (ESI) calcd for C<sub>22</sub>H<sub>21</sub>FNO<sub>3</sub> (M+H)<sup>+</sup> 366.1500, found 366.1496; HPLC: 99% *ee*, chiral stationary column: OJ-H, mobile phase: hexane/<sup>i</sup>PrOH = 80/20, 1.0 mL/min, 254 nm, 25 °C,  $t_R$  (major) = 24.8min,  $t_R$  (minor) =



69.9 min;  $[\alpha]_D^{25} = +23.78$  (c 0.5 CH<sub>2</sub>Cl<sub>2</sub>).

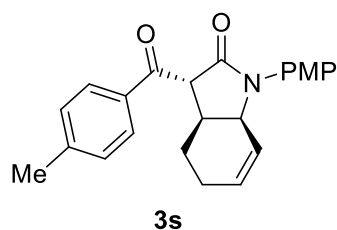

**(3S,3aR,7aR)-1-(4-Methoxyphenyl)-3-(4-methylbenzoyl)-1,3,3a,4,5,7a-hexahydro-2H-indol-2-one (3s):** Colorless oil (65 mg, 90%). <sup>1</sup>H NMR (400 MHz, CDCl<sub>3</sub>)  $\delta = 7.98$ – $7.93$  (m, 2H),  $7.26$ – $7.20$  (m, 4H),  $6.86$ – $6.79$  (m, 2H),  $5.95$ – $5.89$  (m, 1H),  $5.64$ – $5.59$  (m, 1H),  $4.63$ – $4.58$  (m, 1H),  $4.30$  (d,  $J = 5.1$  Hz, 1H),  $3.72$  (s, 3H),  $3.11$ – $3.03$  (m, 1H),  $2.34$  (s, 3H),  $2.10$ – $2.02$  (m, 2H),  $1.83$ – $1.76$  (m, 1H),  $1.69$ – $1.61$  (m, 1H); <sup>13</sup>C NMR (101 MHz, CDCl<sub>3</sub>)  $\delta = 195.3$ ,  $169.3$ ,  $157.8$ ,  $144.4$ ,  $134.1$ ,  $131.6$ ,  $130.2$ ,  $129.5$ ,  $129.2$ ,  $126.0$ ,  $123.7$ ,  $114.3$ ,  $56.5$ ,  $56.4$ ,  $55.4$ ,  $35.2$ ,  $23.6$ ,  $22.7$ ,  $21.6$ ; IR (KBr) (v/cm<sup>-1</sup>): 3323, 3034, 3010, 2924, 2857, 1700, 1676, 1599, 1510, 1445, 1394, 1250, 1040, 837; HRMS (ESI) calcd for C<sub>23</sub>H<sub>24</sub>NO<sub>3</sub> (M+H)<sup>+</sup> 362.1751, found 362.1747; HPLC: 96% *ee*, chiral stationary column: OJ-H, mobile phase: hexane/<sup>i</sup>PrOH = 80/20, 1.0 mL/min, 254 nm, 25 °C,  $t_R$  (major) = 21.4 min,  $t_R$  (minor) = 42.5 min;  $[\alpha]_D^{25} = +39.24$  (c 1.0, CH<sub>2</sub>Cl<sub>2</sub>).

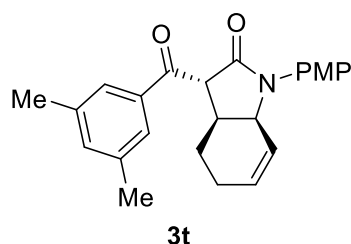

**(3S,3aR,7aR)-3-(3,5-Dimethylbenzoyl)-1-(4-methoxyphenyl)-1,3,3a,4,5,7a-hexahydro-2H-indol-2-one (3t):** Colorless solid (59 mg, 78%). Mp: 116–117 °C; <sup>1</sup>H NMR (400 MHz, CDCl<sub>3</sub>)  $\delta = 7.73$  (s, 2H),  $7.34$ – $7.28$  (m, 2H),  $7.22$  (s, 1H),  $6.93$ – $6.87$  (m, 2H),  $6.03$ – $5.97$  (m, 1H),  $5.72$ – $5.67$  (m, 1H),  $4.72$ – $4.67$  (m, 1H),  $4.38$  (d,  $J = 4.9$  Hz, 1H),  $3.79$  (s, 3H),  $3.16$ – $3.09$  (m, 1H),  $2.38$  (s, 6H),  $2.18$ – $2.09$  (m, 2H),  $1.90$ – $1.83$  (m, 1H),  $1.77$ – $1.69$  (m, 1H); <sup>13</sup>C NMR (101 MHz, CDCl<sub>3</sub>)  $\delta = 196.2$ ,  $169.4$ ,  $157.8$ ,  $138.2$ ,  $136.8$ ,  $135.2$ ,  $131.6$ ,  $130.3$ ,  $127.1$ ,  $126.0$ ,  $123.7$ ,  $114.3$ ,  $56.7$ ,  $56.4$ ,  $55.4$ ,  $35.4$ ,  $23.7$ ,  $22.7$ ,  $21.2$ ; IR (KBr) (v/cm<sup>-1</sup>): 3332, 3136, 3030, 2928, 2847, 1702, 1674, 1512, 1457, 1252, 1026, 828; HRMS (ESI) calcd for C<sub>24</sub>H<sub>26</sub>NO<sub>3</sub> (M+H)<sup>+</sup> 376.1907, found 376.1903; HPLC: 99% *ee*, chiral stationary column: OJ-H, mobile phase: hexane/<sup>i</sup>PrOH = 80/20, 1.0 mL/min, 254 nm, 25 °C,  $t_R$  (major) = 11.5 min,  $t_R$  (minor) = 20.4 min;  $[\alpha]_D^{25} = +50.52$  (c 1.0, CH<sub>2</sub>Cl<sub>2</sub>).

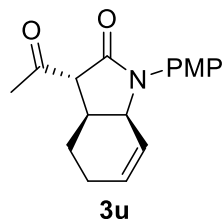

**(3R,3aS,7aS)-3-Acetyl-1-(4-Methoxyphenyl)-1,3,3a,4,5,7a-hexahydro-2H-indol-2-one (3u):** Colorless solid (39 mg, 69%). Mp: 137~139 °C; <sup>1</sup>H NMR (400 MHz, CDCl<sub>3</sub>) δ = 7.23–7.17 (m, 2H), 6.90–6.76 (m, 2H), 5.95–5.82 (m, 1H), 5.59–5.52 (m, 1H), 4.50–4.41 (m, 1H), 3.73 (s, 3H), 3.47 (d, *J* = 6.4 Hz, 1H), 3.10–2.95 (m, 1H), 2.38 (s, 3H), 2.02 (dd, *J* = 6.0, 3.9 Hz, 2H), 1.80–1.67 (m, 1H), 1.74–1.68 (m, 1H), 1.64–1.56 (m, 1H); <sup>13</sup>C NMR (101 MHz, CDCl<sub>3</sub>) δ = 202.5, 167.7, 156.9, 130.5, 129.0, 124.8, 122.6, 113.4, 59.7, 55.3, 54.5, 31.9, 29.3, 22.1, 21.1; IR (KBr) (ν/cm<sup>-1</sup>): 3360, 2969, 2926, 2849, 1684, 1508, 1561, 1406, 1258, 1246, 1105, 811, 740; HRMS (ESI) calcd for C<sub>17</sub>H<sub>20</sub>NO<sub>3</sub> (M+H)<sup>+</sup> 286.1438, found 286.1436; HPLC: 96% *ee*, chiral stationary column: OJ-H, mobile phase: hexane/<sup>i</sup>PrOH = 80/20, 1.0 mL/min, 254 nm, 25 °C, *t*<sub>R</sub> (major) = 18.4 min, *t*<sub>R</sub> (minor) = 39.0 min; [α]<sub>D</sub><sup>25</sup> = +41.40 (*c* 1.0, CH<sub>2</sub>Cl<sub>2</sub>).

## 4. Mechanism Experiments

### 4.1 Procedure for synthesis of 5

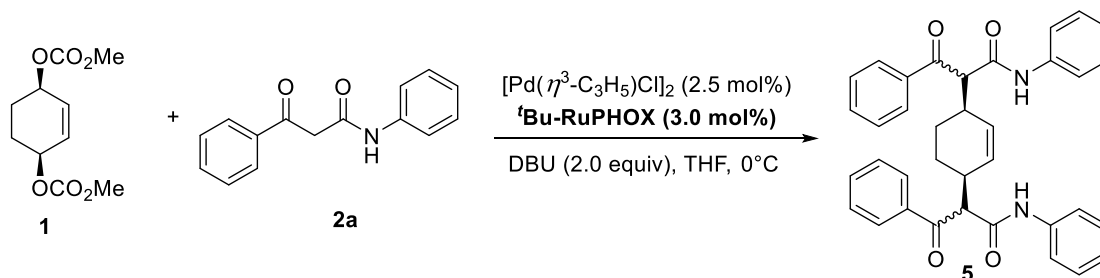

A flame-dried Schlenk tube equipped with a magnetic stirring bar, was charged with a mixture of  $[\text{Pd}(\eta^3\text{-C}_3\text{H}_5)\text{Cl}]_2$  (1.83 mg, 2.5 mol%) and RuPHOX (5.10 mg, 3.0 mol%). After being evacuated and backfilled with nitrogen three times, THF (2 mL) was added to the Schlenk tube and the mixture was stirred at room temperature under  $\text{N}_2$  atmosphere for 1 h. Allylic biscarbonate **1** (51 mg, 0.22 mmol, 1.1 equiv) was added via a syringe followed by the addition of 3-oxo-*N*,3-diphenylpropanamide **2a** (0.2 mmol, 1.0 equiv) and DBU (0.4 mmol, 2.0 equiv). The reaction mixture was allowed to stir under  $\text{N}_2$  atmosphere at 0 °C overnight. THF was evaporated in vacuo and the residue was purified by flash silica gel column chromatography (petroleum ether/ethyl acetate = 3/1) to give colorless solid **5** (23 mg, 22%). Mp: 215~216 °C;  $^1\text{H NMR}$  (400 MHz,  $\text{CDCl}_3$ )  $\delta$  = 8.54 (d,  $J$ =13.0 Hz, 1H), 8.47 (d,  $J$ =4.5 Hz, 1H), 7.99 (t,  $J$ =7.7 Hz, 4H), 7.66–7.54 (m, 2H), 7.48 (dd,  $J$  = 14.5, 7.9 Hz, 8H), 7.31–7.24 (m, 4H), 7.08 (d,  $J$  = 7.7 Hz, 2H), 5.93–5.67 (m, 1H), 5.67–5.45 (m, 1H), 4.52–4.31 (m, 2H), 3.05 (s, 2H), 1.92–1.68 (m, 4H);  $^{13}\text{C NMR}$  (101 MHz,  $\text{CDCl}_3$ )  $\delta$  = 200.0, 199.8, 199.2, 198.8, 171.0, 165.3, 165.1, 152.1, 137.4, 137.4, 137.3, 137.3, 136.7, 136.7, 136.6, 136.6, 134.3, 134.2, 134.2, 132.4, 132.1, 131.7, 131.6, 131.1, 131.0, 130.6, 130.4, 130.0, 129.9, 129.9, 129.4, 129.0, 128.9, 128.9, 128.9, 128.8, 128.8, 128.71, 128.66, 128.4, 128.3, 128.2, 128.1, 127.9, 127.3, 126.6, 125.6, 125.6, 124.8, 124.5, 124.5, 124.4, 123.5, 121.2, 120.0, 119.8, 119.8, 119.8, 119.3, 62.1, 61.0, 60.9, 60.8, 60.6, 60.3, 38.9, 38.8, 38.1, 37.7, 29.6, 24.5, 24.4, 23.5, 23.2, 20.9, 14.1; HRMS (ESI) calcd for  $\text{C}_{36}\text{H}_{32}\text{N}_2\text{NaO}_4$  ( $\text{M}+\text{Na}$ ) $^+$  579.2254, found 579.2248.

### 4.2 Procedure for synthesis of 7

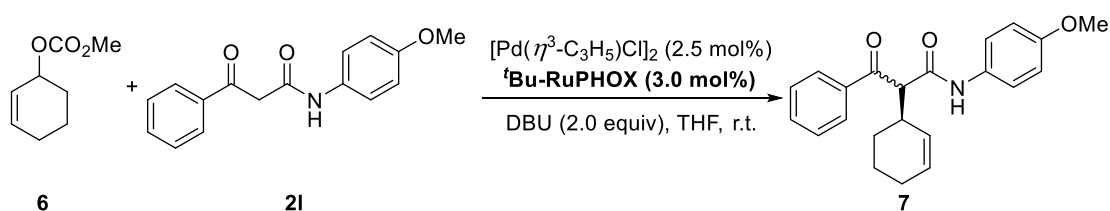

A flame-dried Schlenk tube equipped with a magnetic stirring bar, was charged with a mixture of  $[\text{Pd}(\eta^3\text{-C}_3\text{H}_5)\text{Cl}]_2$  (1.83 mg, 2.5 mol%) and RuPHOX (5.10 mg, 3.0 mol%). After being evacuated and backfilled with nitrogen three times, THF (2 mL) was added to the Schlenk tube and the mixture was stirred at room temperature under  $\text{N}_2$  atmosphere for 1 h. Allylic carbonate **6** (34 mg, 0.22 mmol, 1.1 equiv) was added via a syringe followed by the addition of **21** (54mg, 0.2 mmol, 1.0 equiv) and DBU (0.4 mmol, 2.0 equiv). The reaction mixture was allowed to stir under  $\text{N}_2$  atmosphere at room temperature for 3 h. THF was evaporated in vacuo and the residue was purified by flash silica gel column chromatography (petroleum ether/ethyl acetate = 5/1) to give colorless oil **7** (64 mg, 93%).  $^1\text{H}$  NMR (400 MHz,  $\text{CDCl}_3$ )  $\delta$  = 8.41 (d,  $J$  = 17.4 Hz, 1H), 8.03 (d,  $J$  = 6.6 Hz, 2H), 7.60 (d,  $J$  = 9.6 Hz, 1H), 7.44 (dd,  $J$  = 28.1, 7.9 Hz, 4H), 6.81 (d,  $J$  = 8.7 Hz, 2H), 5.72–5.64 (m, 1H), 5.39–5.30 (m, 1H), 4.36 (dd,  $J$  = 10.4, 3.1 Hz, 1H), 3.74 (s, 3H), 3.05 (q,  $J$  = 7.7, 6.2 Hz, 1H), 2.03–1.90 (m, 2H), 1.82–1.68 (m, 2H), 1.53 (d,  $J$  = 34.4 Hz, 2H);  $^{13}\text{C}$  NMR (101 MHz,  $\text{CDCl}_3$ )  $\delta$  = 200.6, 200.2, 165.4, 165.2, 156.5, 156.4, 137.1, 134.1, 134.1, 130.7, 130.3, 129.9, 128.9, 128.8, 128.7, 127.2, 126.6, 121.6, 121.5, 114.0, 61.7, 61.5, 55.4, 39.8, 39.5, 27.5, 26.6, 24.9, 24.8, 20.8, 20.7; HPLC: 96% ee (major), 1.2:1 dr, chiral stationary column: IE, mobile phase: hexane/*i*PrOH = 90/10, 1.0 mL/min, 254 nm, 40 °C,  $t_{\text{R}}$  (major) = 25.2 min,  $t_{\text{R}}$  (minor) = 21.0 min.

### 4.3 Control experiments: variation of ee/dr over time

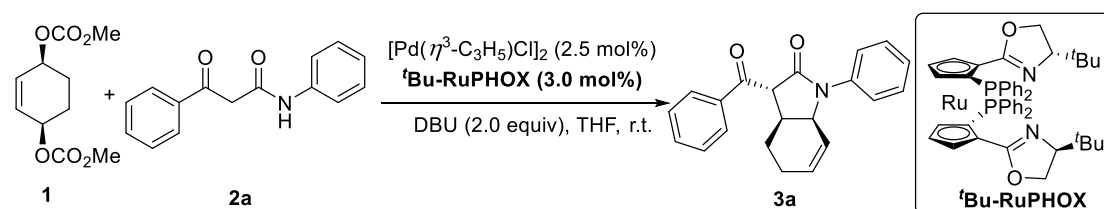

| time / min | 5     | 10    | 20    | 30    | 60    |
|------------|-------|-------|-------|-------|-------|
| ee / %     | 96    | 96    | 96    | 96    | 96    |
| dr         | >20:1 | >20:1 | >20:1 | >20:1 | >20:1 |

A flame-dried Schlenk tube equipped with a magnetic stirring bar, was charged with a mixture of  $[\text{Pd}(\eta^3\text{-C}_3\text{H}_5)\text{Cl}]_2$  (9.15 mg, 2.5 mol%) and RuPHOX (25.50 mg, 3.0 mol%). After being evacuated and backfilled with nitrogen three times, THF (10 mL) was added to the Schlenk tube and the mixture was stirred at room temperature under  $\text{N}_2$  atmosphere for 1 h. Allylic biscarbonate **1** (253 mg, 1.1 mmol, 1.1 equiv) was added via a syringe followed by the addition of 3-oxo-*N*,3-diphenylpropanamide **2a** (239 mg, 1 mmol) and DBU (2 mmol, 2.0 equiv). The reaction mixture was sampled at a suitable

time and the solvent was evaporated in vacuo. The residue was purified by flash silica gel column chromatography (petroleum ether/ethyl acetate = 5/1) to give **3a**. Ees were determined by chiral HPLC and drs were determined by  $^1\text{H}$  NMR.

### NMR spectra of the crude product **3a** sampled at different time

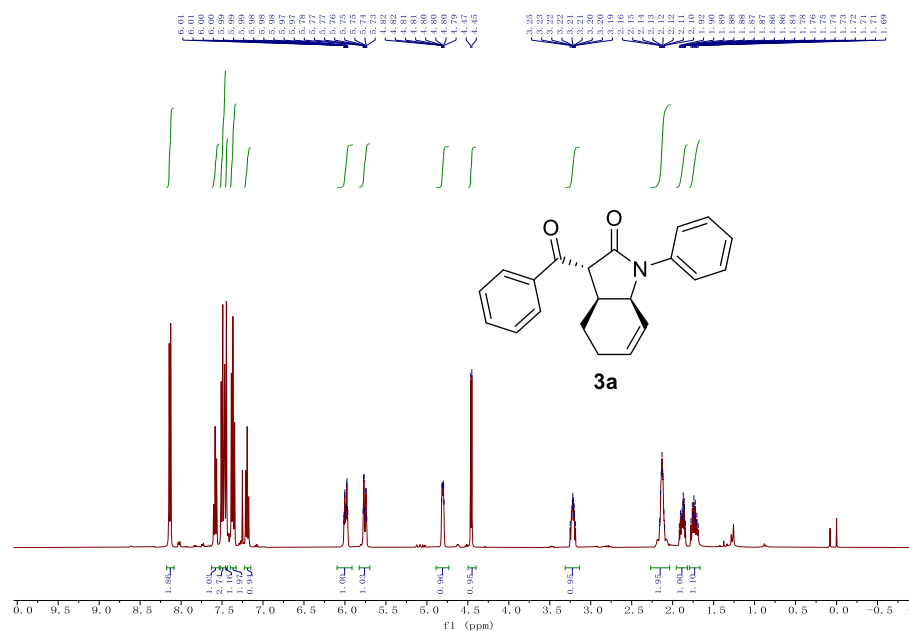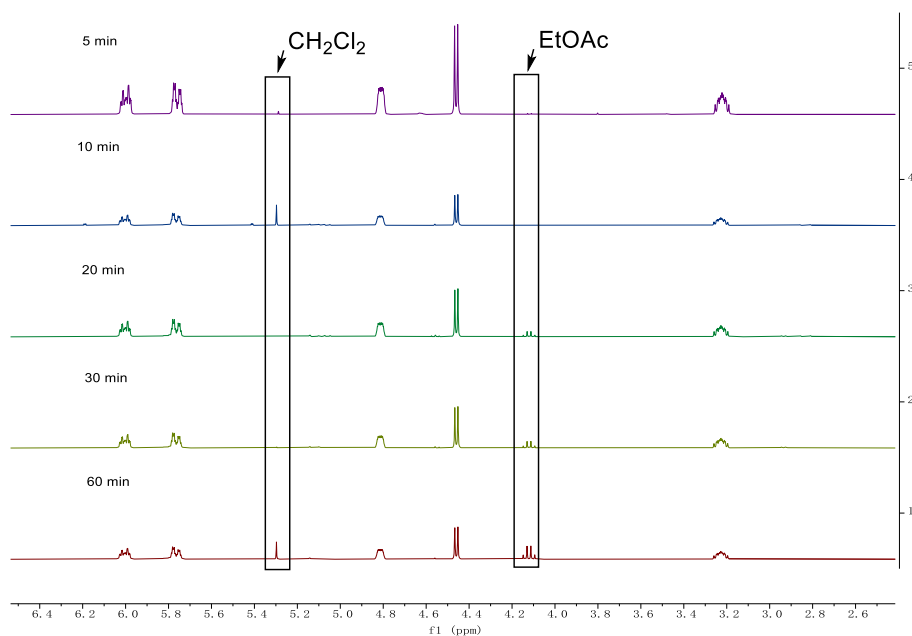

It was observed that only one set of peaks were shown in the above Figure. We therefore can conclude almost one pair of enantiomers exist, illustrating that  $>20:1$  drs being obtained for **3a** sampled at different time.

### HPLC analysis for 3a sampled at different time

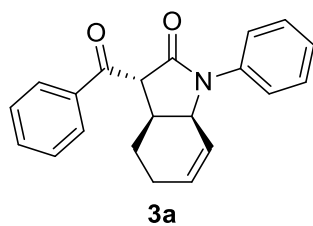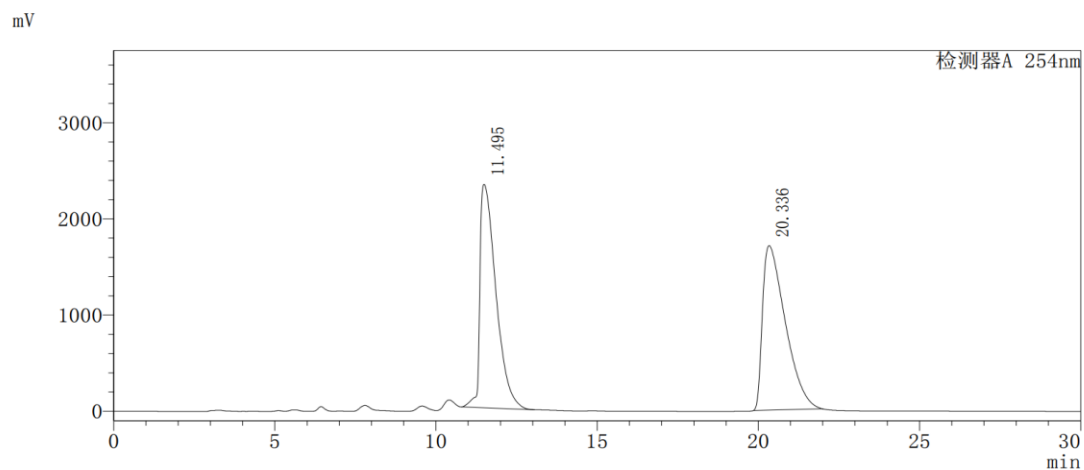

PDA Ch1 254nm

| Peak # | Ret. Time | Area      | Conc % |
|--------|-----------|-----------|--------|
| 1      | 11.495    | 80244428  | 48.768 |
| 2      | 20.336    | 84297169  | 51.232 |
| Total  |           | 164541597 | 100.0  |

5 min:

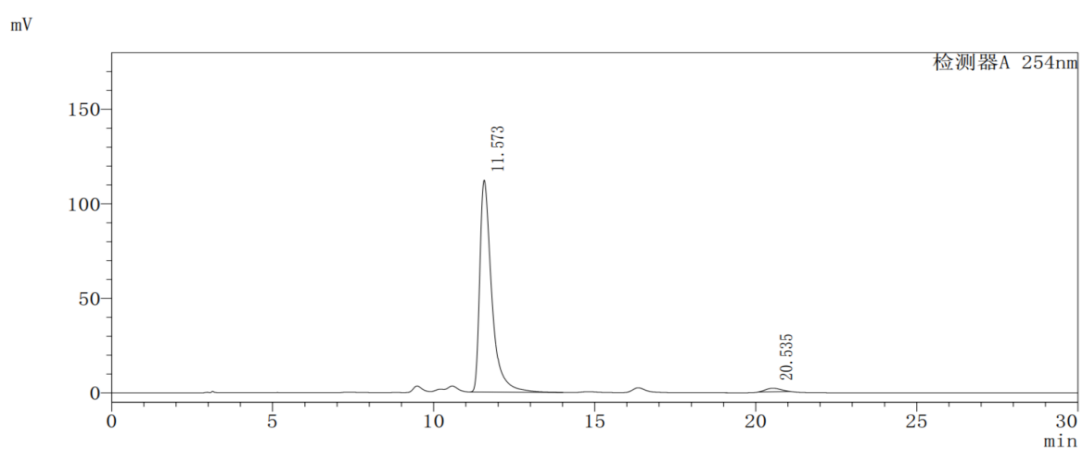

PDA Ch1 254nm

| Peak # | Ret. Time | Area    | Conc % | Ee % |
|--------|-----------|---------|--------|------|
| 1      | 11.573    | 2896918 | 97.909 | 96   |
| 2      | 20.535    | 61868   | 2.091  |      |
| Total  |           | 2958786 | 100.0  |      |

10 min:

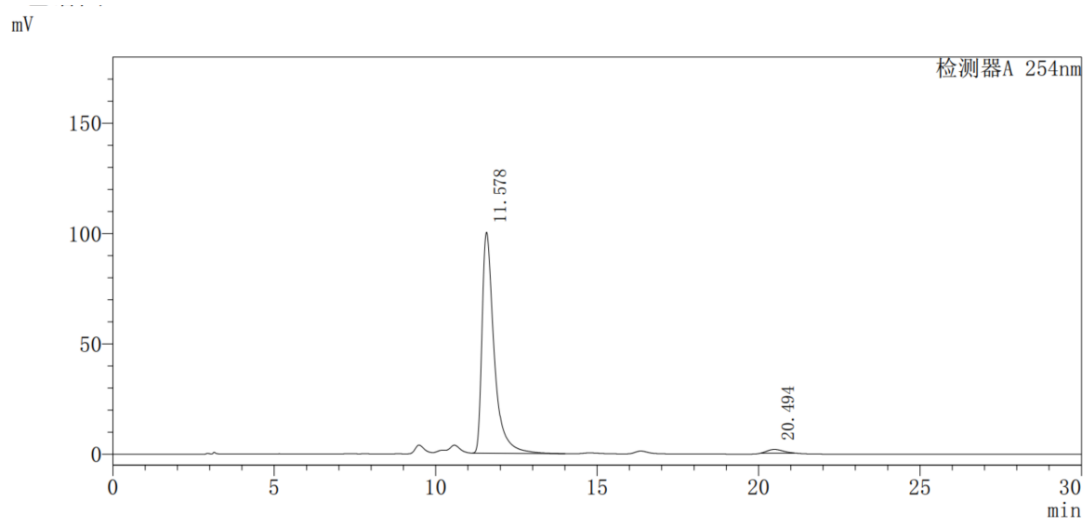

PDA Ch1 254nm

| Peak # | Ret. Time | Area    | Conc % | Ee % |
|--------|-----------|---------|--------|------|
| 1      | 11.578    | 2609861 | 97.964 | 96   |
| 2      | 20.494    | 54232   | 2.036  |      |
| Total  |           | 2664093 | 100.0  |      |

20 min:

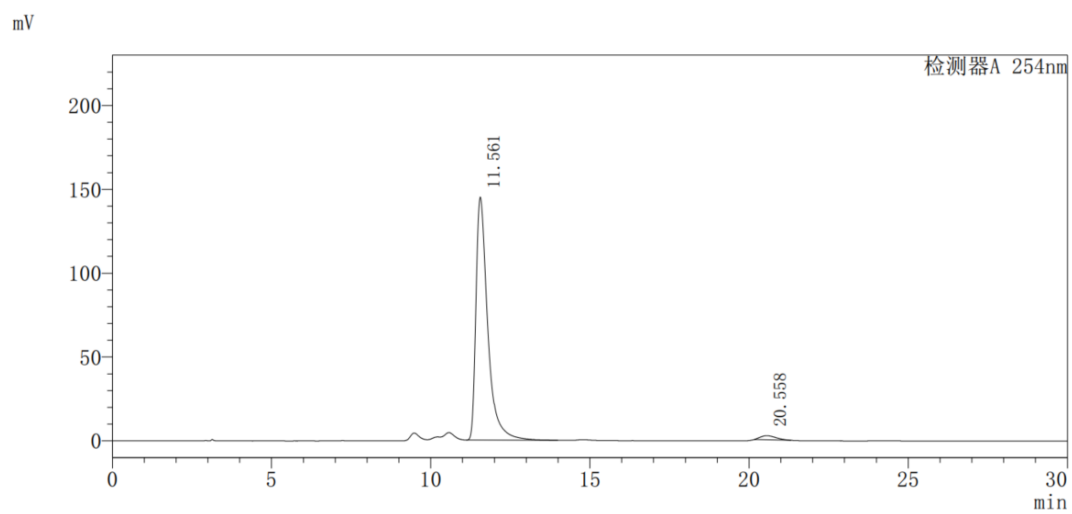

PDA Ch1 254nm

| Peak # | Ret. Time | Area    | Conc % | Ee % |
|--------|-----------|---------|--------|------|
| 1      | 11.561    | 3721990 | 97.820 | 96   |
| 2      | 20.558    | 82939   | 2.180  |      |
| Total  |           | 3804930 | 100.0  |      |

30 min:

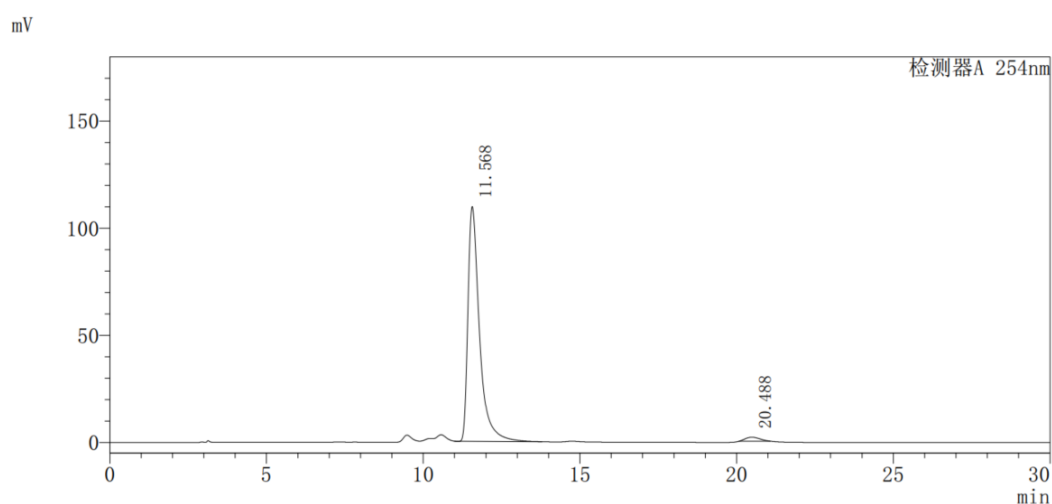

PDA Ch1 254nm

| Peak # | Ret. Time | Area    | Conc % | Ee % |
|--------|-----------|---------|--------|------|
| 1      | 11.568    | 2806583 | 97.922 | 96   |
| 2      | 20.488    | 59563   | 2.078  |      |
| Total  |           | 2866145 | 100.0  |      |

60 min:

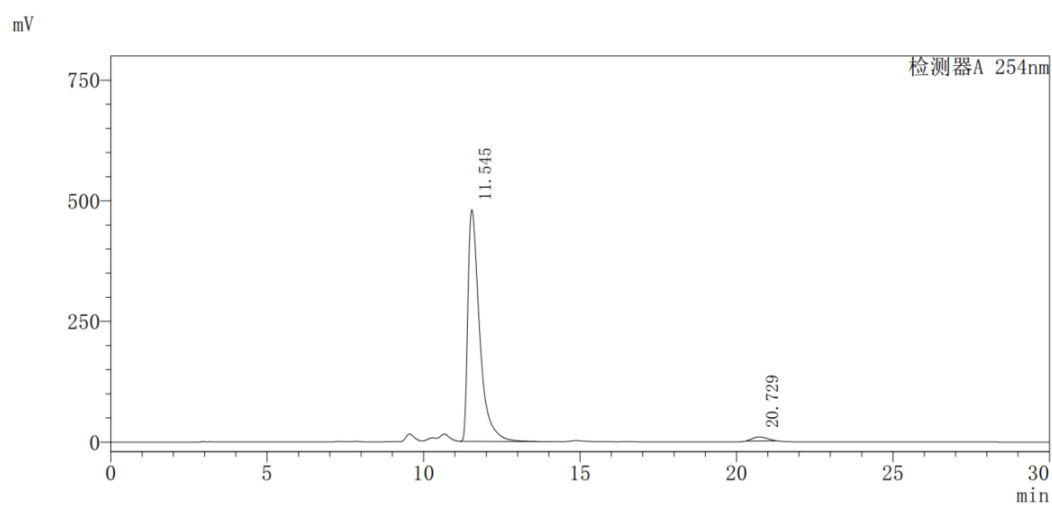

PDA Ch1 254nm

| Peak # | Ret. Time | Area     | Conc % | Ee % |
|--------|-----------|----------|--------|------|
| 1      | 11.545    | 12507313 | 97.883 | 96   |
| 2      | 20.729    | 270502   | 2.117  |      |
| Total  |           | 12777815 | 100.0  |      |



## 5. Large Scale Reaction and Transformations

### 5.1 Large-Scale Synthesis of **3I**

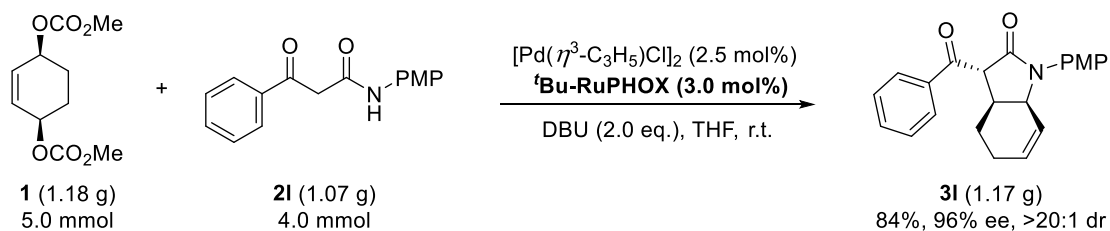

A flame-dried Schlenk tube equipped with a magnetic stirring bar, was charged with a mixture of  $[\text{Pd}(\eta^3\text{-C}_3\text{H}_5)\text{Cl}]_2$  (36.6 mg, 2.5 mol%) and RuPHOX (133.0 mg, 3.0 mol%). After being evacuated and backfilled with nitrogen three times, THF (40 mL) was added to the Schlenk tube and the mixture was stirred at room temperature under  $\text{N}_2$  atmosphere for 1 h. Allylic biscarbonate **1** (5.0 mmol, 1.18 g) was added via a syringe followed by the addition of **2I** (4.0 mmol, 1.07 g) and DBU (4.0 mmol, 1.21 g). The reaction mixture was allowed to stir under  $\text{N}_2$  atmosphere at room temperature for 3 h. THF was evaporated in vacuo and the residue was purified by flash silica gel column chromatography (petroleum ether/ethyl acetate = 3/1) to give product **3I** as white solid (1.17 g, 84%). HPLC: 96% ee, chiral stationary column: OJ-H, mobile phase: hexane/*i*PrOH = 80/20, 1.0 mL/min, 254 nm, 25 °C,  $t_{\text{R}}$  (major) = 20.3 min,  $t_{\text{R}}$  (minor) = 60.5 min.

### 5.2 Procedure for synthesis of **8**

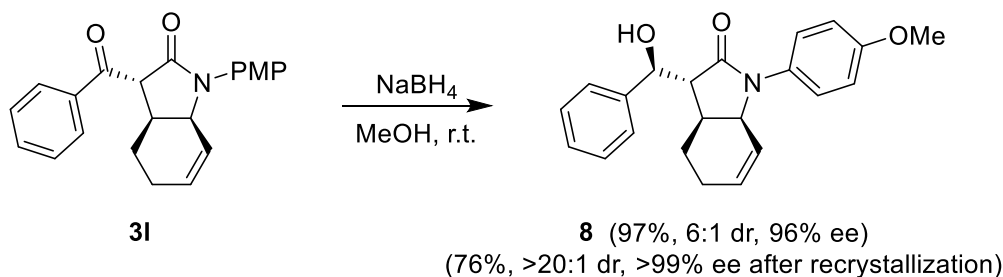

A tube equipped with a magnetic stirring bar, was charged with **3I** (70 mg, 0.2 mmol) in MeOH (2 mL). Then the temperature was reduced to 0 °C. To the mixture was added  $\text{NaBH}_4$  (30 mg, 0.8 mmol, 4.0 equiv) in portion. The reaction was then warmed to room temperature. After stirring at the same temperature for 6 h, the solvent was removed under reduced pressure and the residue was treated with ethyl acetate (3 mL) and water (1 mL). The organic layer was concentrated under vacuum, the residue was purified by flash silica gel column chromatography (petroleum ether/ethyl acetate = 2/1) to give **8** as a white solid (97%, 6:1 dr, 96% ee), which can be recrystallized from petroleum ether/ethyl acetate (5/1) to give the highly enantioenriched **8** (52 mg, 74%). Mp:

99~101 °C; <sup>1</sup>H NMR (500 MHz, CDCl<sub>3</sub>) δ = 7.41 (d, *J* = 7.1 Hz, 1H), 7.39–7.29 (m, 2H), 7.25 (d, *J* = 8.4 Hz, 1H), 6.90 (d, *J* = 9.0 Hz, 1H), 5.90–5.75 (m, 1H), 5.53 (dt, *J* = 10.2, 2.4 Hz, 1H), 4.15 (dd, *J* = 7.5, 2.4 Hz, 1H), 3.80 (s, 2H), 2.95 (dd, *J* = 7.7, 3.8 Hz, 1H), 2.57 (qd, *J* = 7.2, 4.2 Hz, 1H), 2.01–1.79 (m, 1H), 1.71–1.46 (m, 1H), 1.23–1.02 (m, 1H); <sup>13</sup>C NMR (101 MHz, CDCl<sub>3</sub>) δ = 174.1, 157.7, 141.7, 131.0, 130.2, 128.4, 127.5, 125.9, 125.4, 123.8, 114.4, 72.4, 56.9, 55.5, 52.4, 31.7, 23.4, 21.7; IR (KBr) (v/cm<sup>-1</sup>): 2962, 2930, 2853, 1678, 1714, 1678, 1526, 1455, 1271, 1090, 1046, 815; HRMS (ESI) calcd for C<sub>22</sub>H<sub>24</sub>NO<sub>3</sub> (M+H)<sup>+</sup> 350.1751, found 350.1751; HPLC: 99% *ee* (major), >20:1 *dr*, chiral stationary column: OD, mobile phase: hexane/<sup>i</sup>PrOH = 80.0/20.0, 1.0 mL/min, 254 nm, 25 °C, *t<sub>R</sub>* (major) = 14.7 min, *t<sub>R</sub>* (minor) = 7.9 min; [α]<sub>D</sub><sup>25</sup> = +32.28 (*c* 1.0, CH<sub>2</sub>Cl<sub>2</sub>).

### 5.3 Procedure for synthesis of **9**

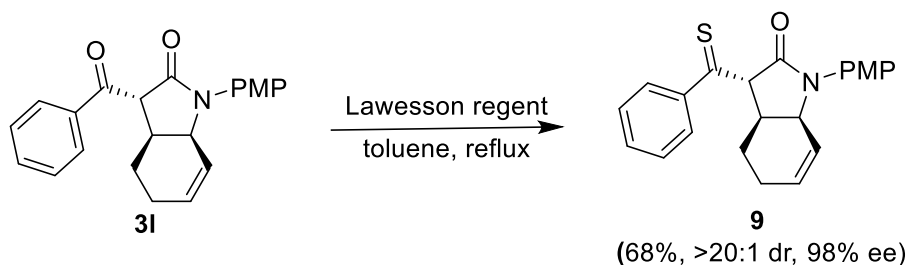

A flame-dried Schlenk tube equipped with a magnetic stirring bar, was charged with a mixture of **31** (70 mg, 0.2mmol, 1.0 equiv) and lawesson's reagent (24.3 mg, 0.06mmol, 0.6 equiv). After being evacuated and backfilled with nitrogen three times, dry toluene (2 mL) was added to the Schlenk tube and the mixture was heated to reflux under N<sub>2</sub> atmosphere for 24 h. Then the mixture was cooled to room temperature and the solvent was removed under vacuum. The residue was purified by flash silica gel column chromatography (petroleum ether/ethyl acetate = 5:1) to give products **9** as a white solid (49 mg, 68%). Mp: 178~179 °C; <sup>1</sup>H NMR (500 MHz, CDCl<sub>3</sub>) δ = 8.17 (d, *J* = 8.2 Hz, 2H), 7.70–7.61 (m, 1H), 7.55 (t, *J* = 7.2 Hz, 2H), 7.29–7.24 (m, 2H), 7.01 (dd, *J* = 9.0, 3.3 Hz, 2H), 6.17–6.01 (m, 1H), 5.61–5.46 (m, 1H), 4.95 (d, *J* = 2.9 Hz, 1H), 4.93 (d, *J* = 4.9 Hz, 1H), 3.85 (s, 3H), 3.04–2.81 (m, 1H), 2.22 (dd, *J* = 18.3, 4.7 Hz, 1H), 2.16–2.06 (m, 1H), 2.00–1.83 (m, 1H), 1.77–1.67 (m, 1H); <sup>13</sup>C NMR (101 MHz, CDCl<sub>3</sub>) δ = 198.2, 197.0, 159.3, 136.5, 133.7, 133.0, 132.7, 129.6, 128.7, 128.4, 122.5, 114.7, 67.4, 65.2, 55.5, 38.8, 24.2, 23.4; IR (KBr) (v/cm<sup>-1</sup>): 2960, 2931, 3380, 1718, 1704, 1680, 1544, 1510, 1461, 1254, 1027, 805; HRMS (ESI) calcd for C<sub>22</sub>H<sub>22</sub>NO<sub>2</sub>S (M+H)<sup>+</sup> 364.1366, found 364.1366; HPLC: 98% *ee*, chiral stationary column: IA, mobile phase: hexane/<sup>i</sup>PrOH = 85/15, 1.0 mL/min, 254 nm, 25 °C, *t<sub>R</sub>* (major) = 38.3 min, *t<sub>R</sub>* (minor) = 42.2 min; [α]<sub>D</sub><sup>25</sup> = +67.88 (*c* 1.0, CH<sub>2</sub>Cl<sub>2</sub>).

#### 5.4 Procedure for synthesis of **10**

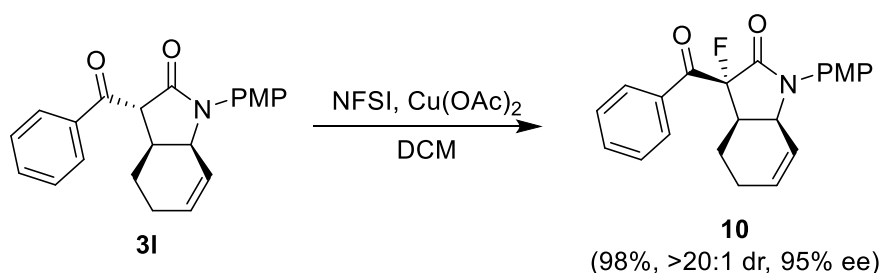

In a Schlenk tube equipped with a magnetic stirring bar, **31** (35 mg, 0.1 mmol, 1.0 equiv), NFSI (35mg, 0.11 mmol, 1.1 equiv) and Cu(OAc)<sub>2</sub> (1.03 mg, 5 mol%) were dissolved in CHCl<sub>2</sub> (1 mL). The reaction was stirred at room temperature for 6 h. CHCl<sub>2</sub> was evaporated under vacuum and the residue was purified by flash silica gel column chromatography (petroleum ether/ethyl acetate = 3/1) to give products **10** as colorless solid (36 mg, 98%). Mp: 160~161 °C; <sup>1</sup>H NMR (400 MHz, CDCl<sub>3</sub>) δ = 8.10 (d, *J* = 8.0 Hz, 2H), 7.62 (t, *J* = 7.3 Hz, 1H), 7.50 (t, *J* = 7.6 Hz, 2H), 7.30 (d, *J* = 8.9 Hz, 2H), 6.96 (d, *J* = 8.9 Hz, 2H), 5.96–6.03 (m, 1H), 5.73–5.65 (m, 1H), 4.73–4.79 (m, 1H), 3.82 (s, 3H), 3.14–2.99(m, 1H), 2.13–1.92 (m, 2H), 1.72–1.59 (m, 1H), 1.57–1.46 (m, 1H); <sup>13</sup>C NMR (101 MHz, CDCl<sub>3</sub>) δ = 194.1 (d, *J* = 23.2 Hz), 165.9 (d, *J* = 18.2 Hz), 135.2, 133.9, 132.7, 129.4 (d, *J* = 5.1 Hz), 128.9, 128.6, 126.7, 121.9, 114.5, 103.4, 101.9, 55.5, 53.8, 42.2 (d, *J* = 17.17 Hz, 2H), 23.5, 20.3; <sup>19</sup>F NMR (376 MHz, CDCl<sub>3</sub>) δ = –153.3; IR (KBr) (v/cm<sup>-1</sup>): 3053, 2960, 2926, 2847, 2859, 1724, 1684, 1601, 1514, 1447, 1435, 1402, 1258, 766, 752; HRMS (ESI) calcd for C<sub>22</sub>H<sub>21</sub>FNO<sub>3</sub> (M+H)<sup>+</sup> 366.1500, found 366.1496; HPLC: 95% *ee*, chiral stationary column: IA, mobile phase: hexane/<sup>i</sup>PrOH = 85/15, 1.0 mL/min, 254 nm, 25 °C, *t*<sub>R</sub> (major) = 35.8 min, *t*<sub>R</sub> (minor) = 41.7 min; [α]<sub>D</sub><sup>25</sup> = +20.44 (1.0, CH<sub>2</sub>Cl<sub>2</sub>).

#### 5.5 Procedure for synthesis of **11**

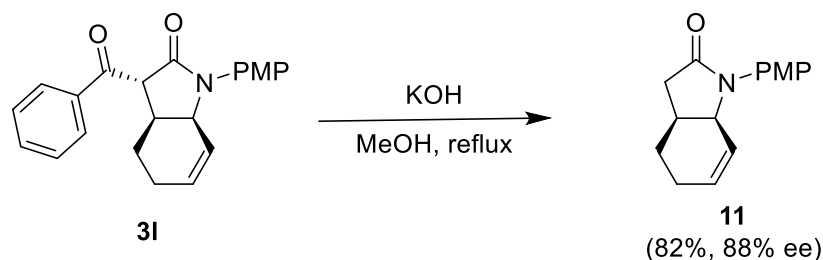

A Schlenk tube equipped with a magnetic stirring bar, **31** (35 mg, 0.1 mmol, 1.0 equiv) and KOH (11mg, 0.2 mmol, 2.0 equiv) were dissolved in MeOH (1 mL), and the mixture was heated to reflux under N<sub>2</sub> atmosphere for 48 h. Then the mixture was cooled to room temperature and the solvent was removed under vacuum. The residue was purified by flash silica gel column chromatography (petroleum ether/ethyl acetate

= 2/1) to give products **11** as colorless oil (20 mg, 82%). <sup>1</sup>H NMR (500 MHz, CDCl<sub>3</sub>) δ = 7.29 (d, *J* = 9.0 Hz, 2H), 6.94 (d, *J* = 8.9 Hz, 2H), 5.99–5.94 (m, 1H), 5.72–5.62 (m, 1H), 4.51–4.47 (m, 1H), 3.82 (s, 3H), 2.72–2.65 (m, 2H), 2.41 (q, *J* = 9.1 Hz, 1H), 2.19–2.04 (m, 2H), 1.84–1.78 (m, 1H), 1.73–1.66 (m, 1H); <sup>13</sup>C NMR (101 MHz, CDCl<sub>3</sub>) δ = 173.8, 157.6, 131.6, 130.5, 126.0, 125.9, 123.6, 114.4, 57.6, 55.5, 36.8, 31.0, 29.7, 24.1, 22.4; IR (KBr) (ν/cm<sup>-1</sup>): 2972, 2930, 1700, 1647, 1536, 1510, 1455, 1346, 1030, 800; HRMS (ESI) calcd for C<sub>15</sub>H<sub>18</sub>NO<sub>2</sub> (M+H)<sup>+</sup> 244.1332, found 244.1331; HPLC: 88% *ee*, chiral stationary column: OZ, mobile phase: hexane/<sup>i</sup>PrOH = 80/20, 1.0 mL/min, 210 nm, 25 °C, *t*<sub>R</sub> (major) = 21.70 min, *t*<sub>R</sub> (minor) = 15.41 min; [α]<sub>D</sub><sup>25</sup> = +67.00 (*c* 0.5, CH<sub>2</sub>Cl<sub>2</sub>).

### 5.6 Procedure for synthesis of **12**

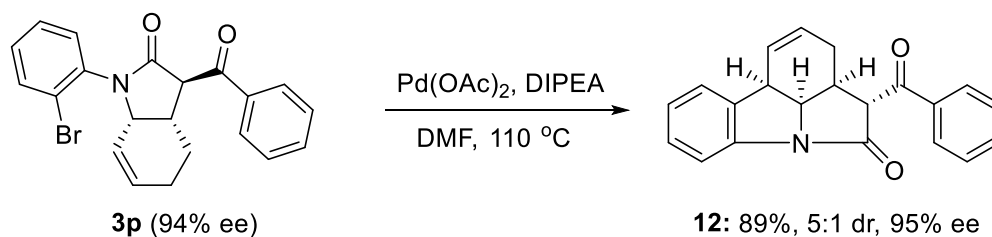

A flame-dried Schlenk tube equipped with a magnetic stirring bar, was charged with a mixture of Pd(OAc)<sub>2</sub> (2.25 mg, 5 mol%) and dppb (52 mg, 10 mol%). After being evacuated and backfilled with nitrogen three times, DMF (2 mL) was added to the Schlenk tube and the mixture was stirred at room temperature under N<sub>2</sub> atmosphere for 1 h. DIPEA (52 mg, 0.4 mmol, 2.0 equiv) was added via a syringe followed by the addition of **3p** (70 mg, 0.2 mmol, 1.0 equiv). The reaction mixture was allowed to stir under N<sub>2</sub> atmosphere at 110 °C for 12 h. DMF was evaporated under vacuum and the residue was purified by flash silica gel column chromatography (petroleum ether/ethyl acetate = 3/1) to give product **12** as a white solid (56 mg, 89%). Mp: 185~187 °C; <sup>1</sup>H NMR (400 MHz, CDCl<sub>3</sub>) δ = 8.23 (dd, *J* = 8.4, 1.3 Hz, 2H), 7.65–7.49 (m, 4H), 7.21 (t, *J* = 7.3 Hz, 2H), 7.12–7.02 (m, 1H), 5.97–5.89 (m, 1H), 5.87–5.79 (m, 1H), 5.31–5.22 (m, 1H), 4.33 (s, 1H), 3.87 (dd, *J* = 9.7, 4.9 Hz, 1H), 3.10 (ddd, *J* = 10.5, 7.1, 5.3 Hz, 1H), 2.40–2.29 (m, 1H), 1.99–1.89 (m, 1H); <sup>13</sup>C NMR (101 MHz, CDCl<sub>3</sub>) δ = 193.6, 167.6, 138.6, 137.6, 135.6, 133.9, 129.6, 128.7, 128.0, 127.3, 125.5, 125.2, 124.9, 115.3, 65.7, 62.5, 38.0, 35.9, 25.0; IR (KBr) (ν/cm<sup>-1</sup>): 3071, 3038, 2928, 2851, 1716, 1702, 1670, 1601, 1538, 1510, 1394, 1034, 804, 766; HRMS (ESI) calcd for C<sub>21</sub>H<sub>18</sub>NO<sub>2</sub> (M+H)<sup>+</sup> 316.1332, found 316.1330; HPLC: 95% *ee* (major), 5:1 *dr*, chiral stationary column: IC, mobile phase: hexane/<sup>i</sup>PrOH = 85.0/15.0, 1.0 mL/min, 254 nm, 25 °C, *t*<sub>R</sub> (major) = 18.7 min, *t*<sub>R</sub> (minor) = 26.7 min; [α]<sub>D</sub><sup>25</sup> = +145.20 (*c* 1.0, CH<sub>2</sub>Cl<sub>2</sub>);

### 5.7 Procedure for synthesis of **13**

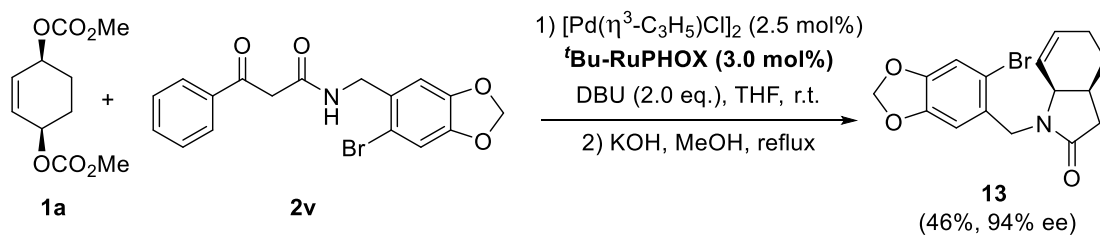

A flame-dried Schlenk tube equipped with a magnetic stirring bar, was charged with a mixture of  $[\text{Pd}(\eta^3\text{-C}_3\text{H}_5)\text{Cl}]_2$  (3.66 mg, 2.5 mol%) and RuPHOX (10.20 mg, 3.0 mol%). After being evacuated and backfilled with nitrogen three times, THF (4 mL) was added to the Schlenk tube and the mixture was stirred at room temperature under  $\text{N}_2$  atmosphere for 1 h. Allylic biscarbonate **1** (108 mg, 0.44 mmol, 1.1 equiv) was added via a syringe followed by the addition of **2v** (0.4 mmol, 1.0 equiv) and DBU (0.8 mmol, 2.0 equiv). The reaction mixture was allowed to stir under  $\text{N}_2$  atmosphere at room temperature for 3 h. THF was evaporated under vacuum and the residue was purified by flash silica gel column chromatography (petroleum ether/ethyl acetate = 3/1) to give **3v**. Then, to a Schlenk tube equipped with a magnetic stirring bar, was added KOH (56.11 mg, 1 mmol, 5.0 equiv), **3v** and MeOH (2 mL). The mixture was then heated to reflux under an  $\text{N}_2$  atmosphere for 48 h. Then the mixture was cooled to room temperature and the solvent was removed under reduced pressure. The residue was purified by a flash silica gel column chromatography (petroleum ether/ethyl acetate = 2/1) to give product **13** as white solid (64 mg, 46%). Mp: 85~86 °C;  $^1\text{H}$  NMR (400 MHz,  $\text{CDCl}_3$ )  $\delta$  = 6.95 (s, 1H), 6.73 (s, 1H), 5.93 (s, 3H), 5.75–5.66 (m, 1H), 4.74 (d,  $J$  = 15.6 Hz, 1H), 4.24 (d,  $J$  = 15.6 Hz, 1H), 3.84–3.46 (m, 2H), 2.46 (s, 1H), 2.25 (dd,  $J$  = 15.2, 4.7 Hz, 1H), 2.12–2.02 (m, 1H), 2.02–1.92 (m, 1H), 1.75–1.56 (m, 3H);  $^{13}\text{C}$  NMR (101 MHz,  $\text{CDCl}_3$ )  $\delta$  = 175.3, 149.6, 132.6, 130.2, 123.2, 113.5, 112.6, 108.7, 101.7, 54.4, 44.0, 36.3, 31.0, 23.5, 22.2; IR (KBr) ( $\nu/\text{cm}^{-1}$ ): 3361, 2964, 2922, 2855, 1702, 1686, 1510, 1481, 1261, 817, 746; HRMS (ESI) calcd for  $\text{C}_{16}\text{H}_{17}^{79}\text{BrNO}_3$  ( $\text{M}+\text{H}$ ) $^+$  350.0386, found 350.0385, calcd for  $\text{C}_{16}\text{H}_{17}^{81}\text{BrNO}_3$  ( $\text{M}+\text{H}$ ) $^+$  352.0366, found 352.0363; HPLC: 94% ee, chiral stationary column: AD, mobile phase: hexane/ $i$ PrOH = 80.0/20.0, 1.0 mL/min, 210 nm, 25 °C,  $t_R$  (major) = 13.8 min,  $t_R$  (minor) = 10.1 min;  $[\alpha]_D^{25} = +2.80$  ( $c$  0.5,  $\text{CH}_2\text{Cl}_2$ ).

## 6. NMR Spectra

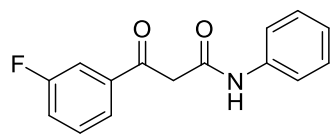

**2b**

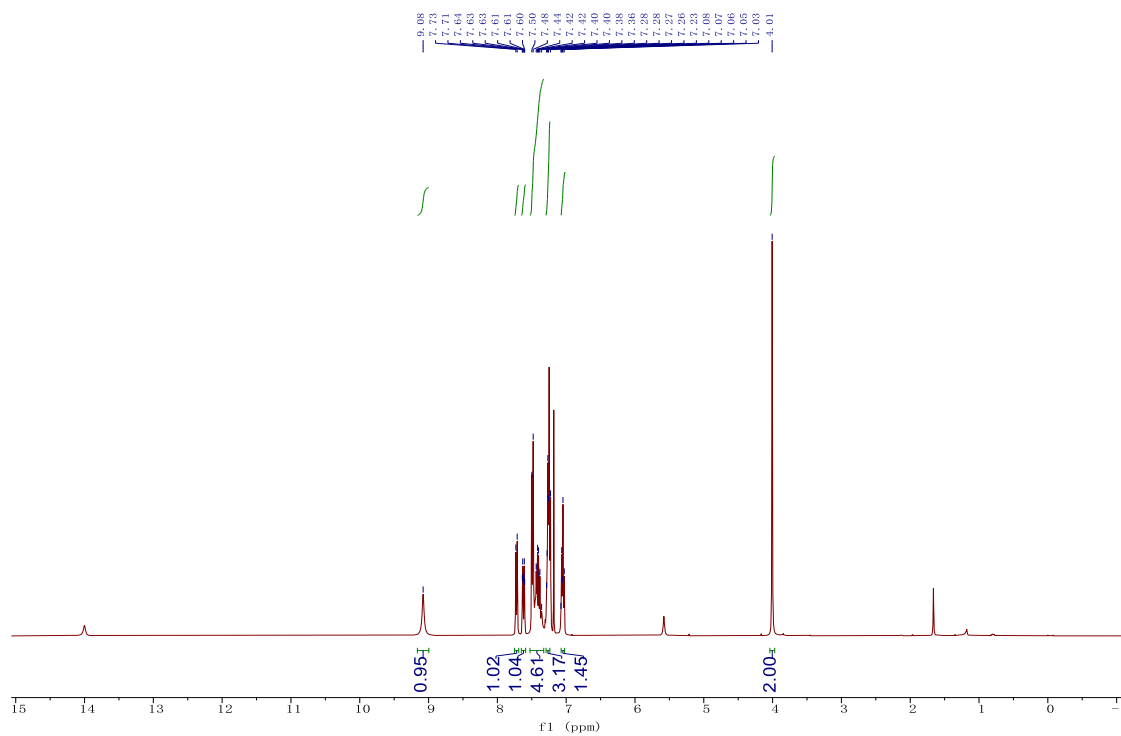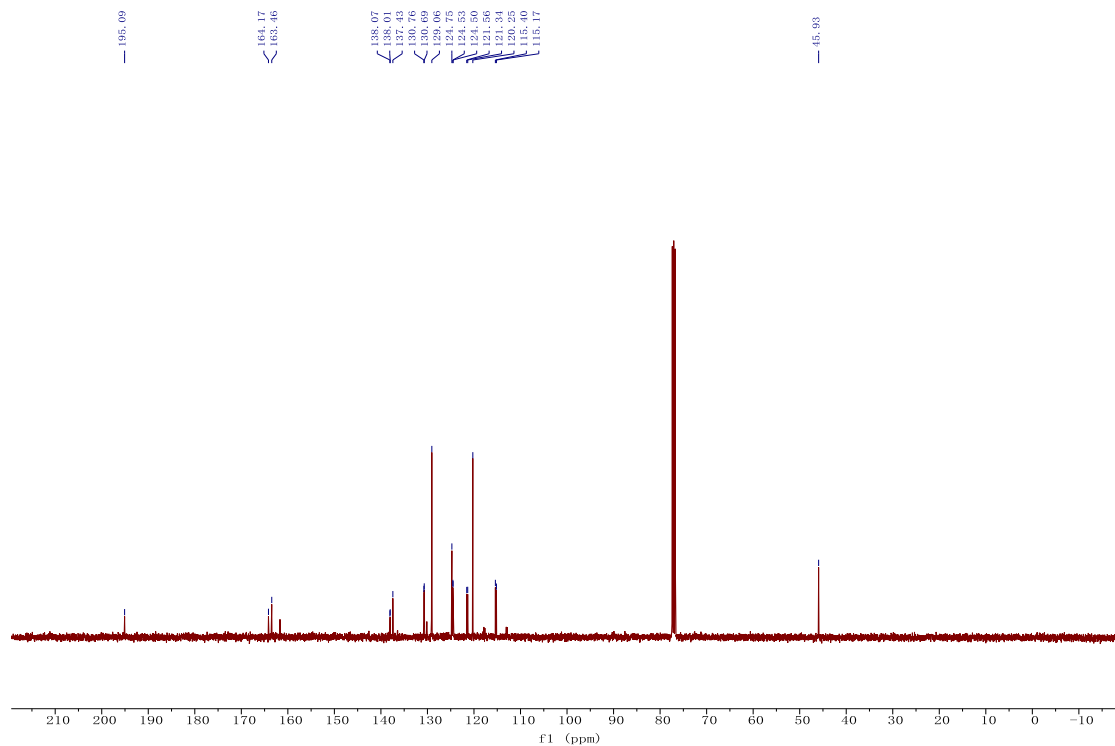

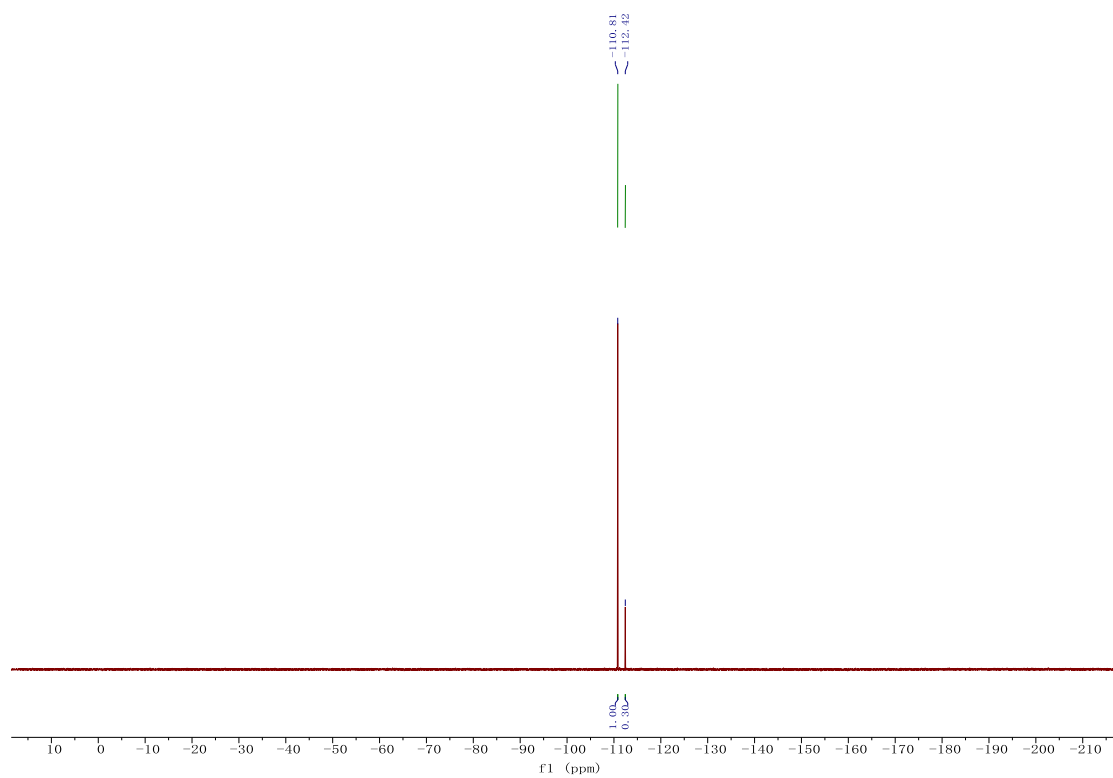

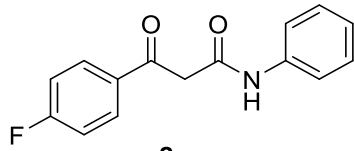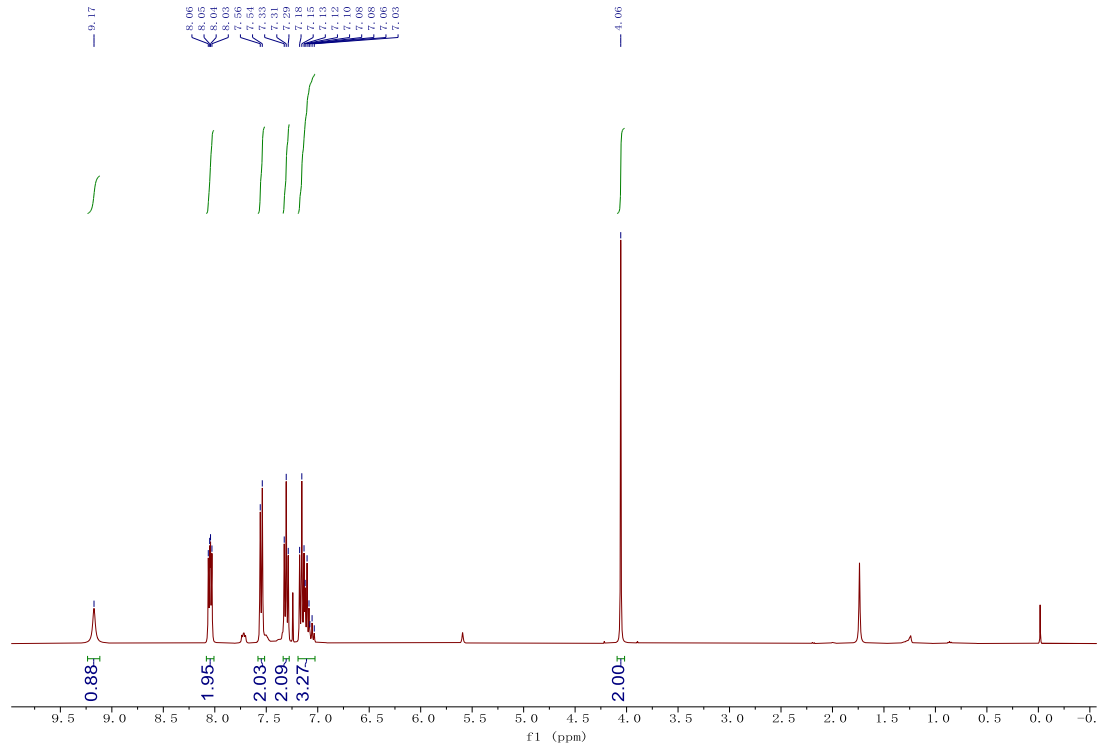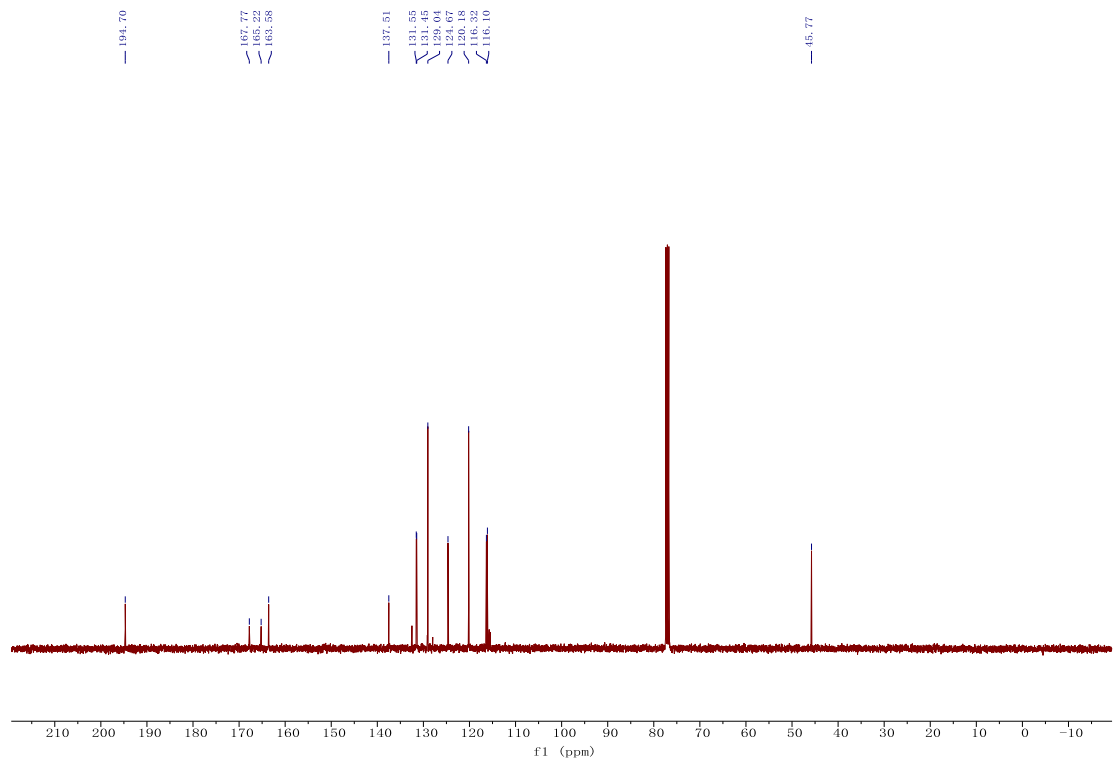



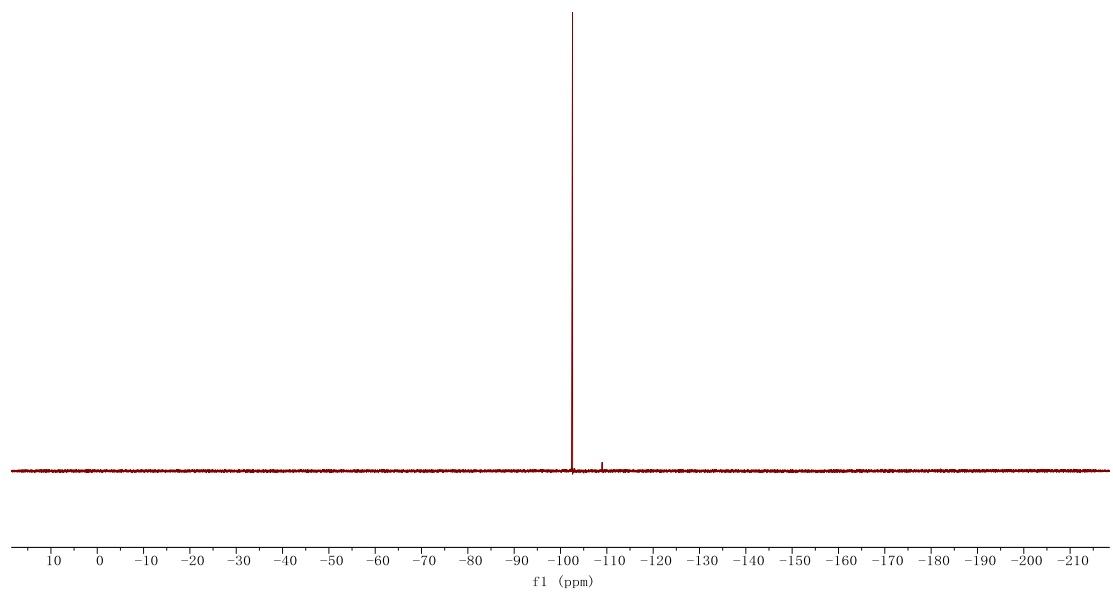

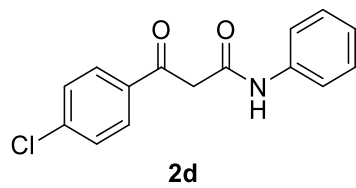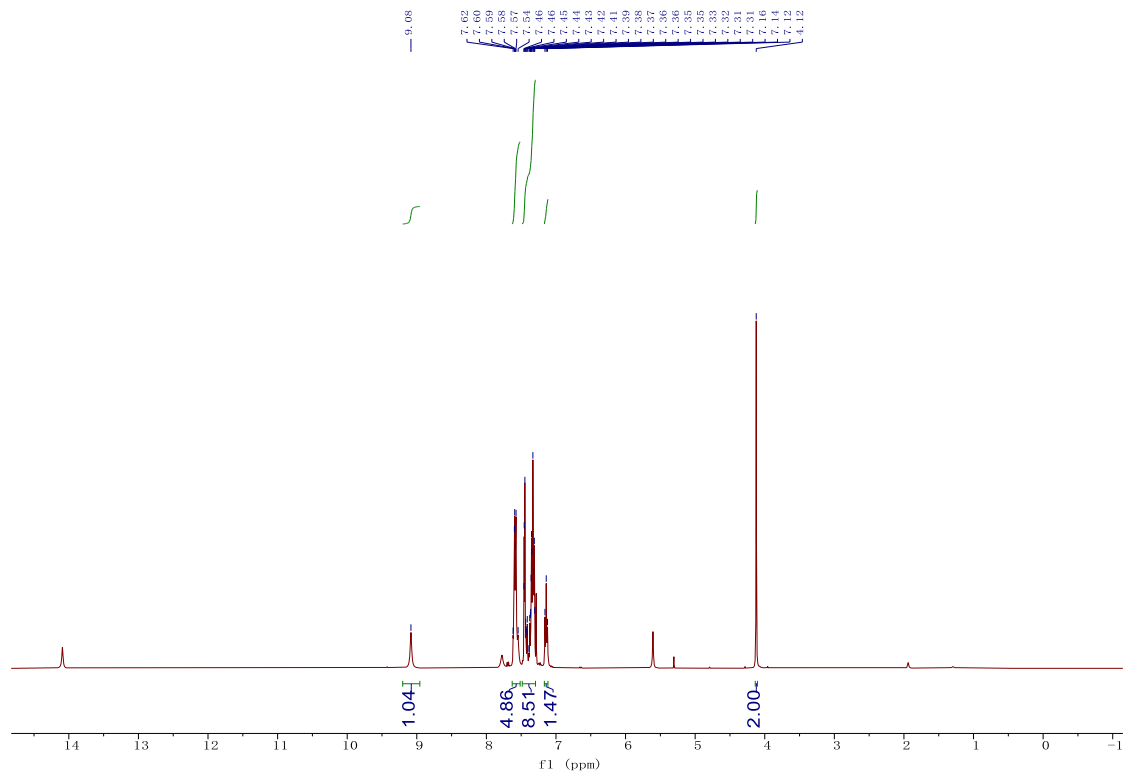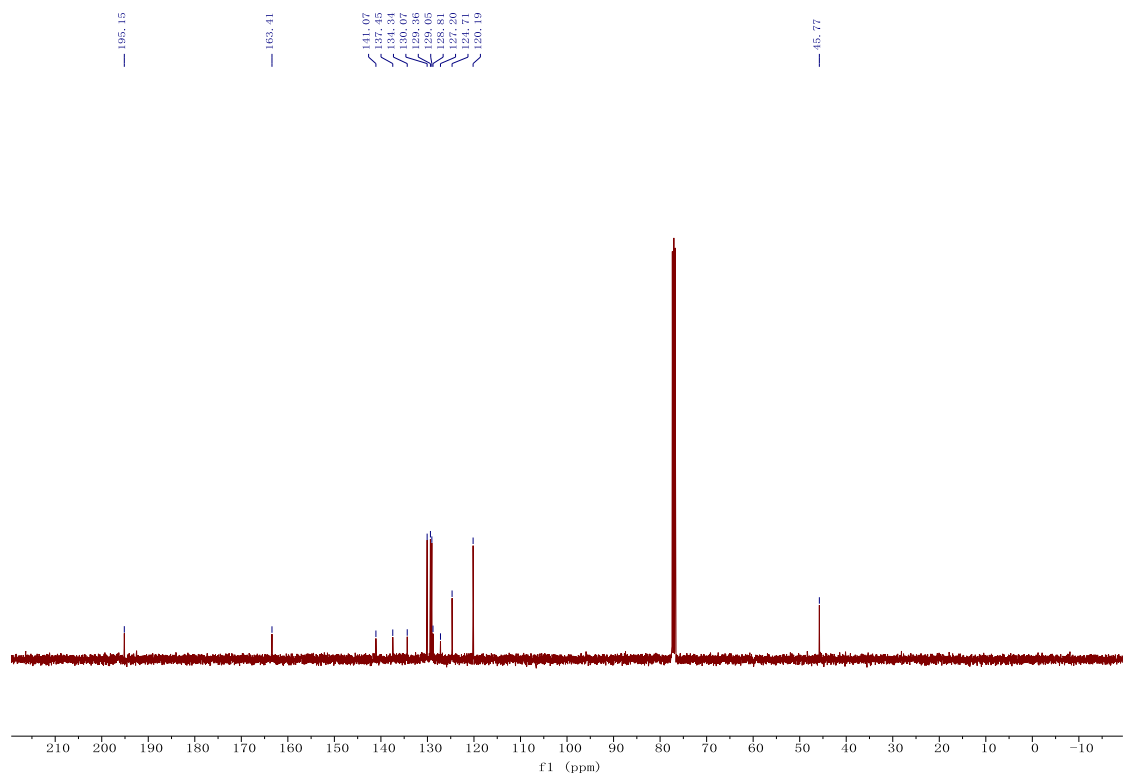

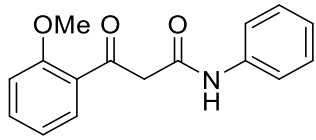

**2e**

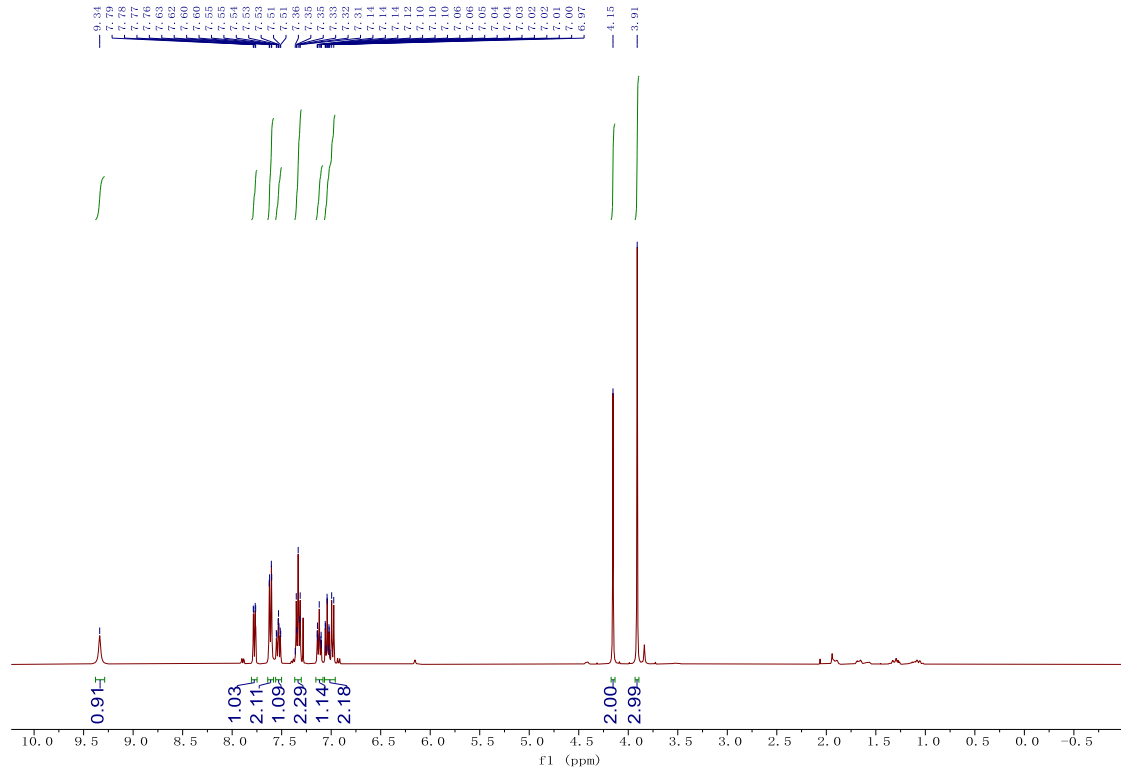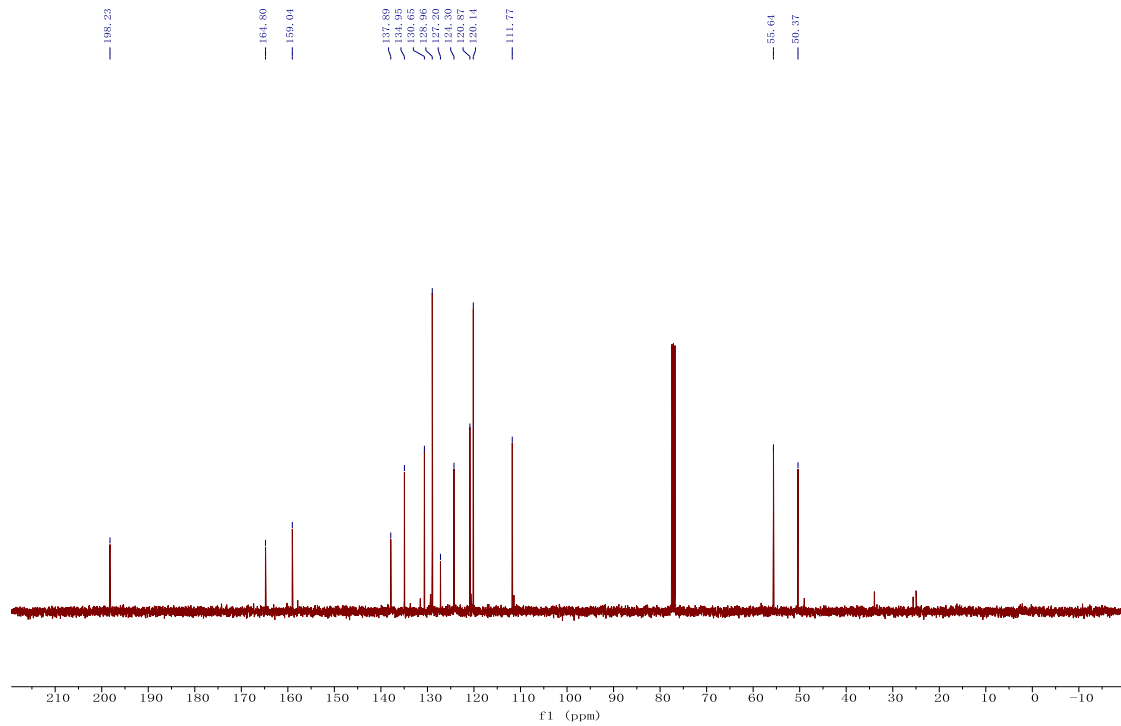

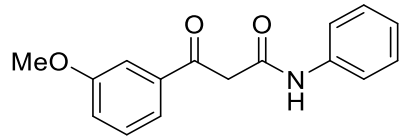

**2f**

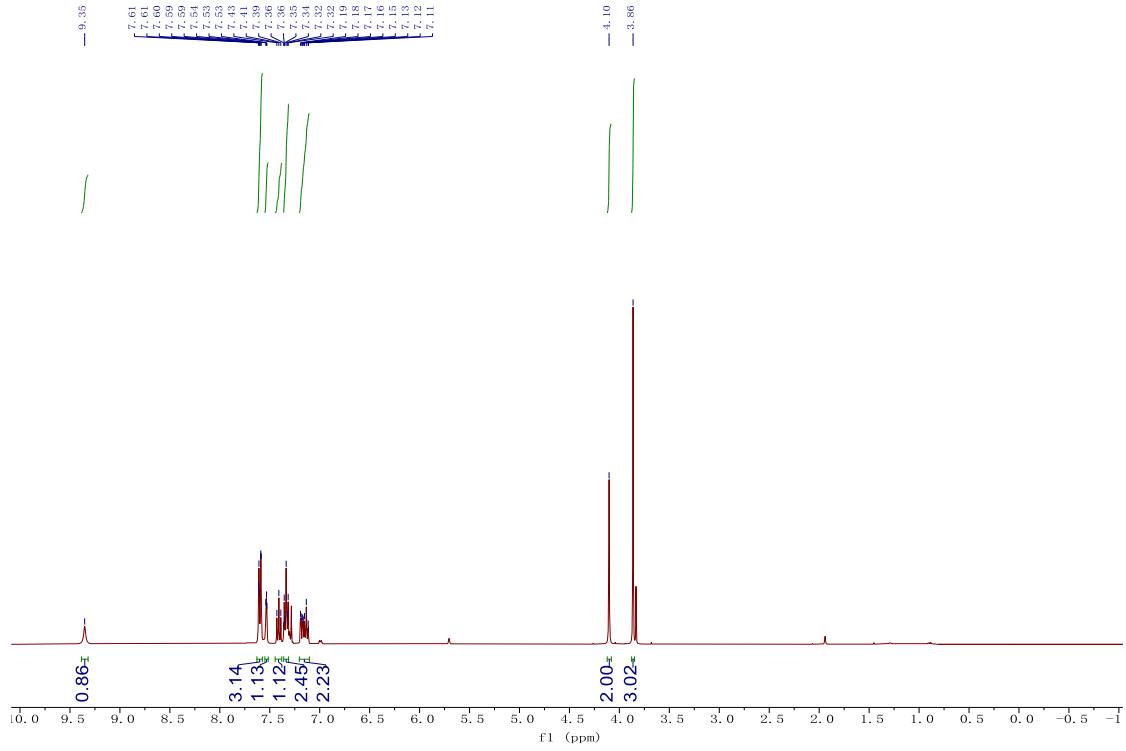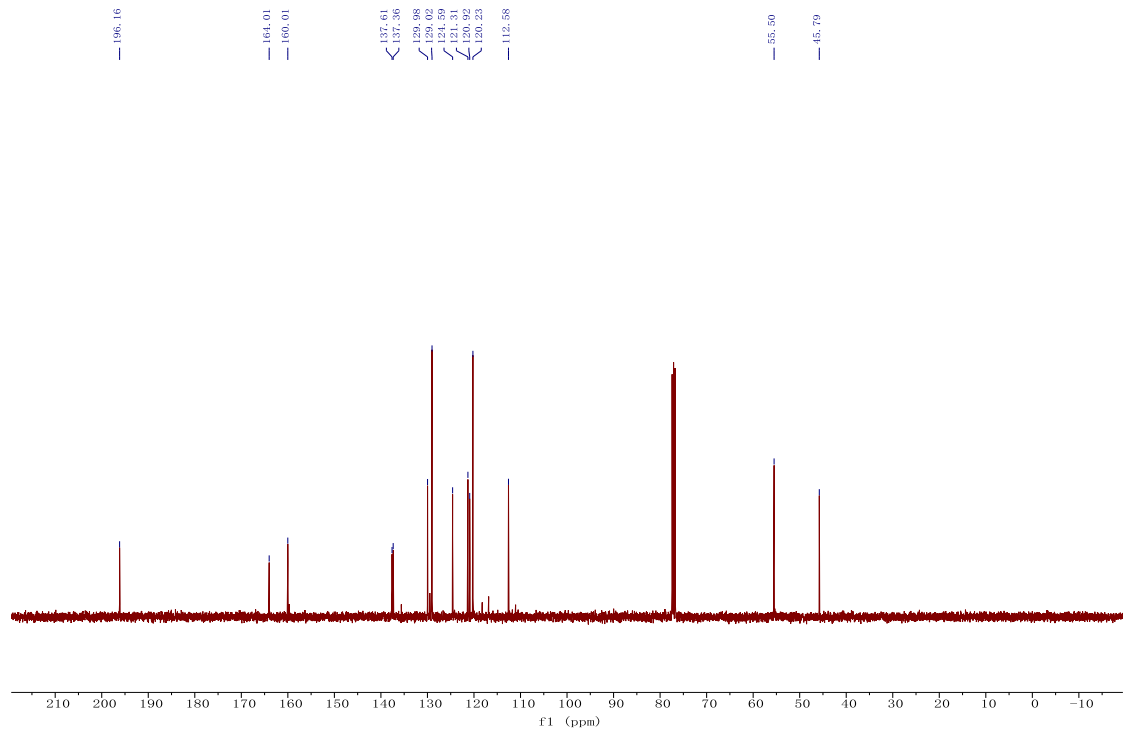

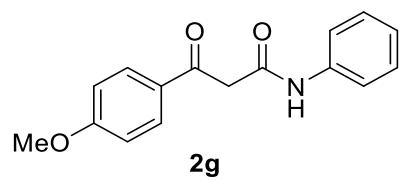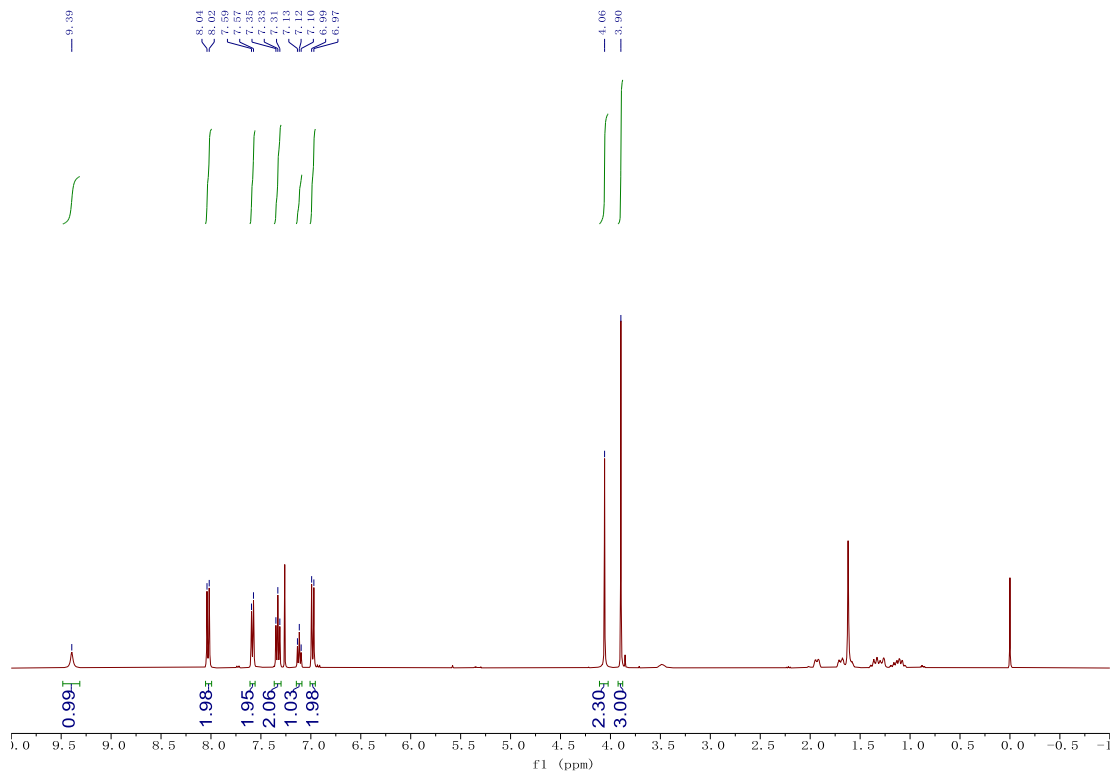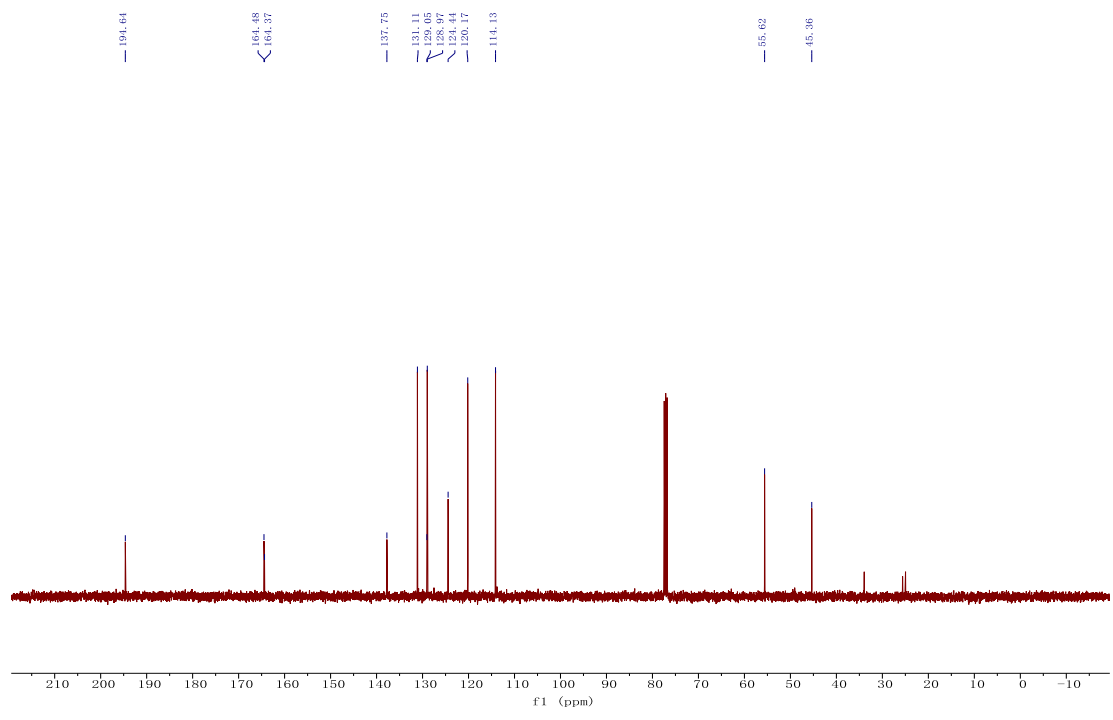

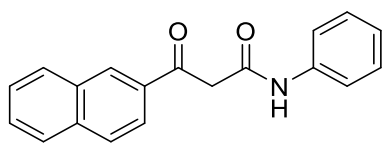

**2i**

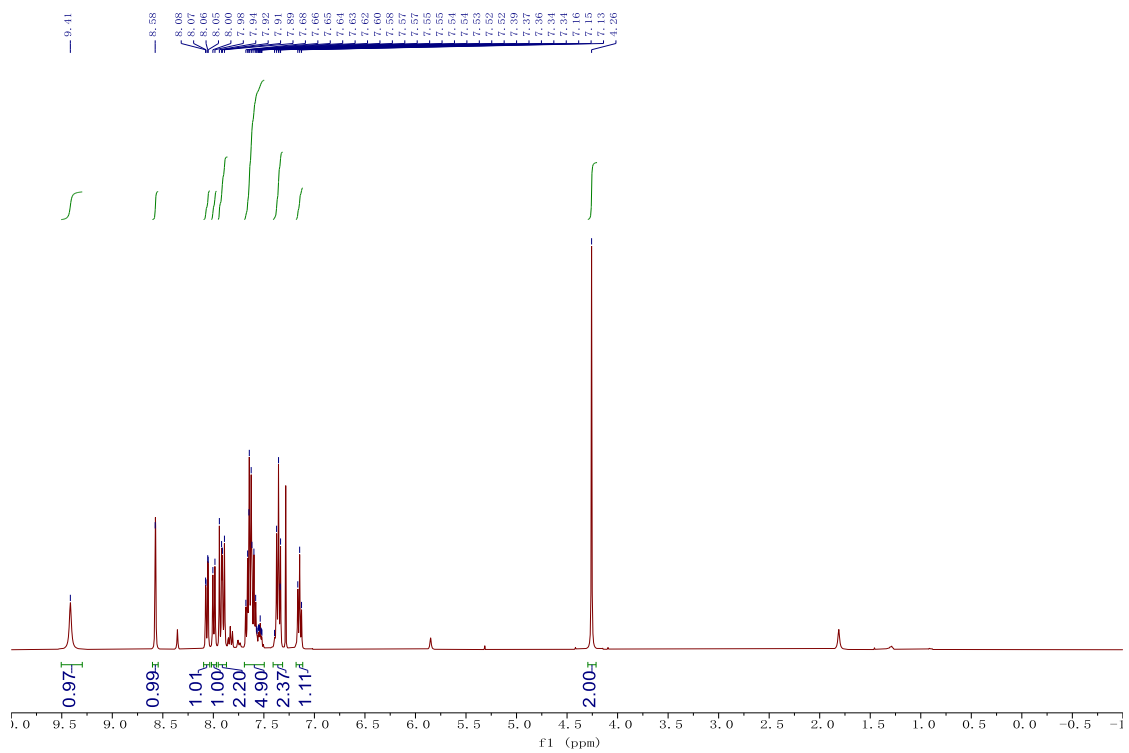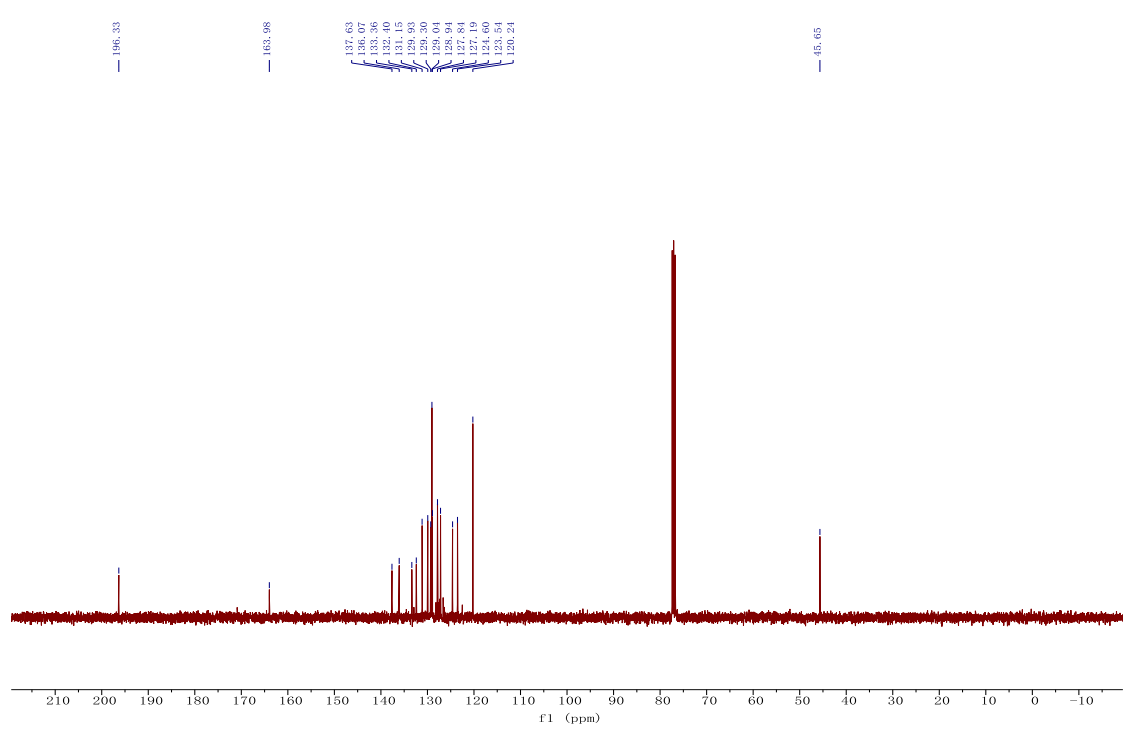

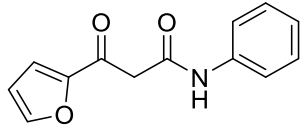

2j

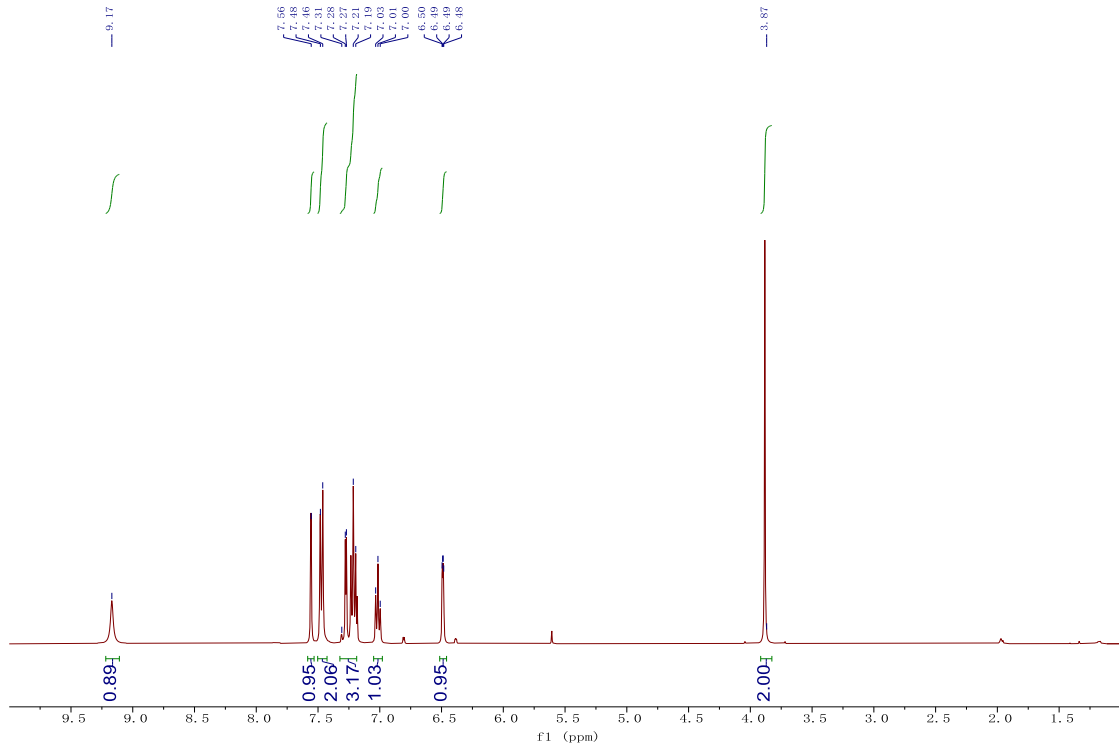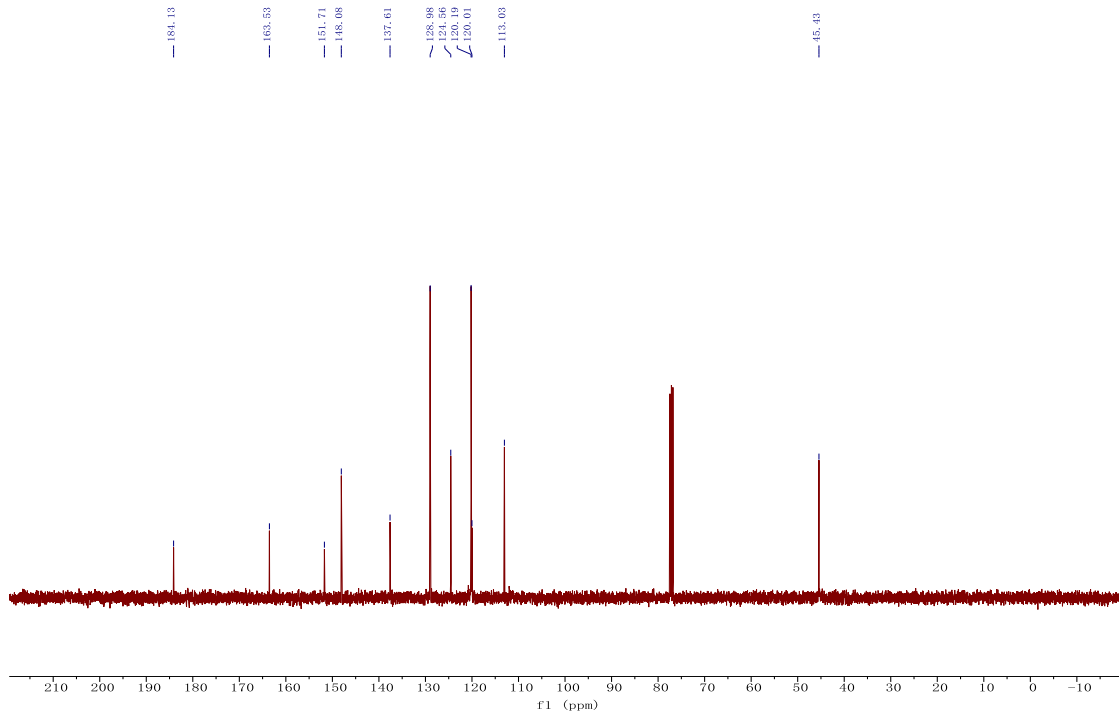

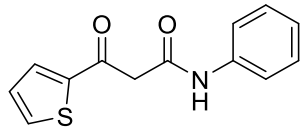

**2k**

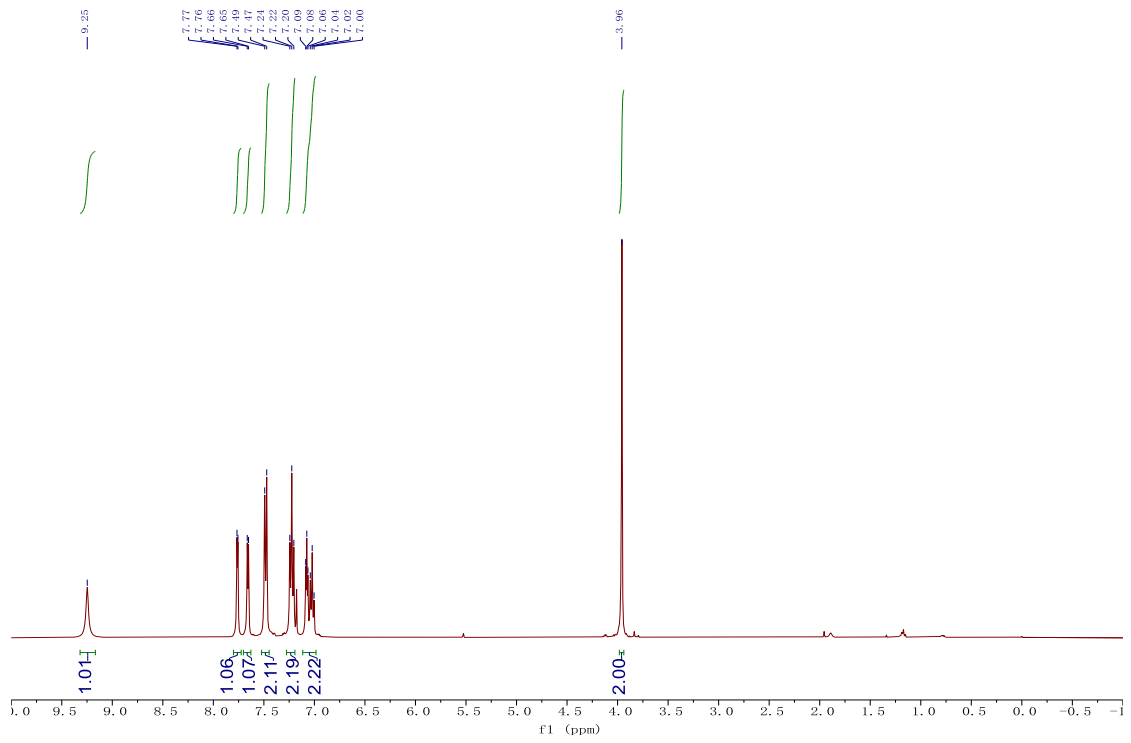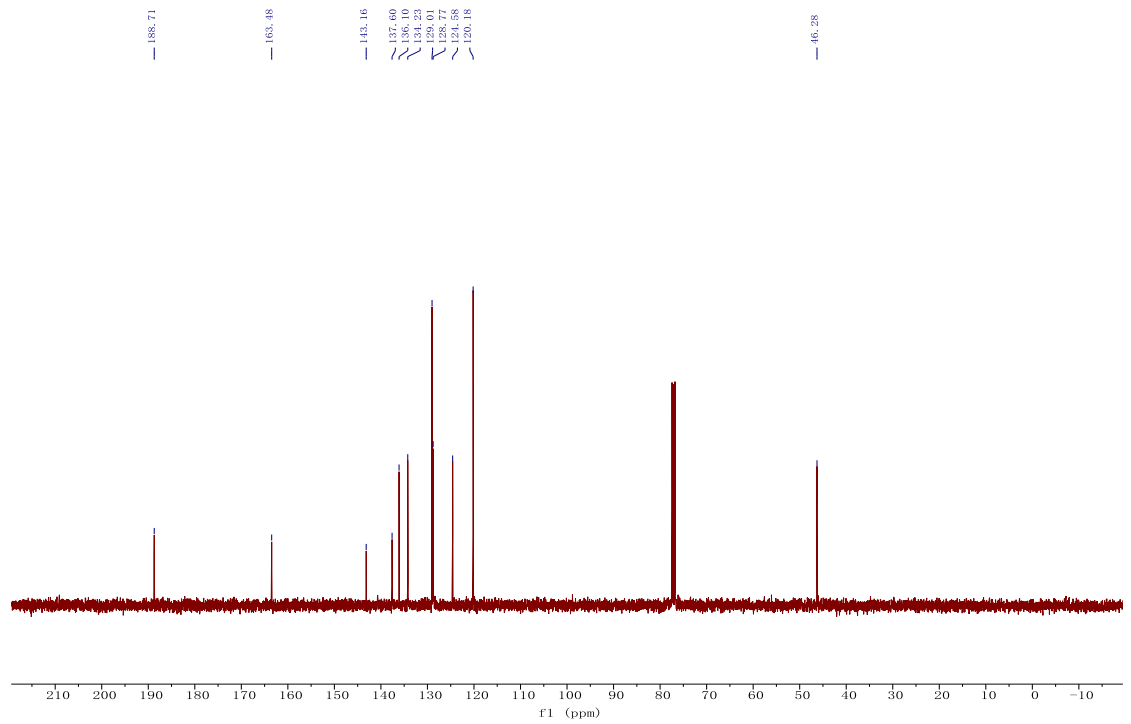



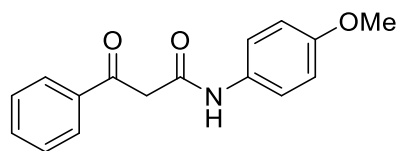

21

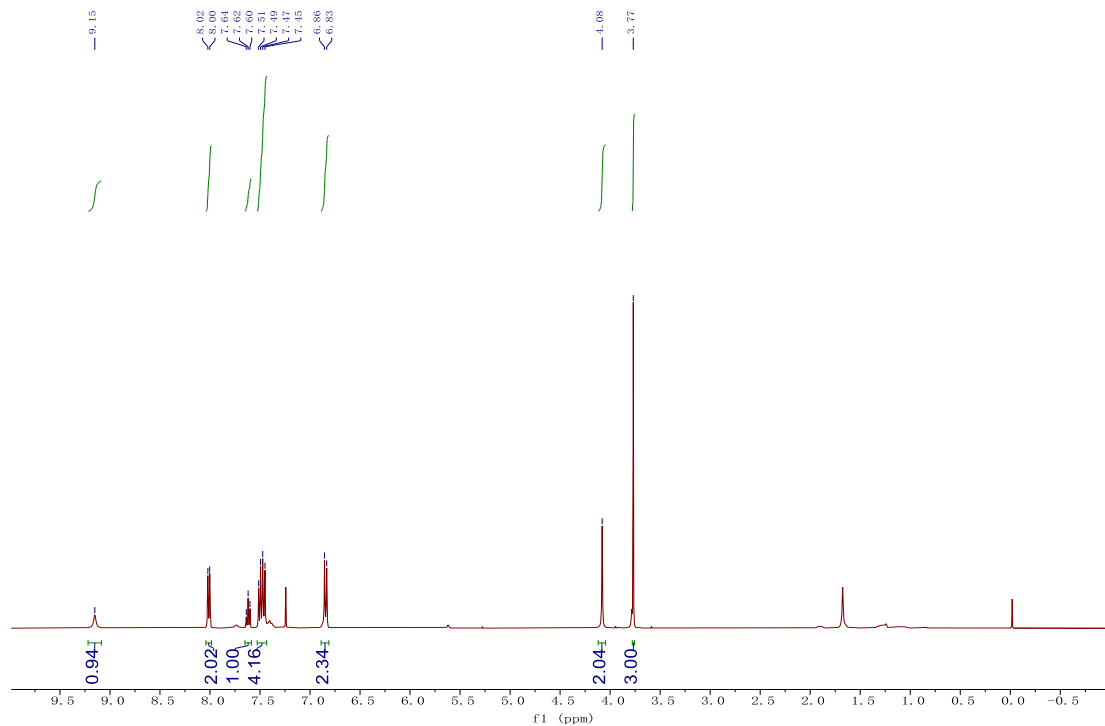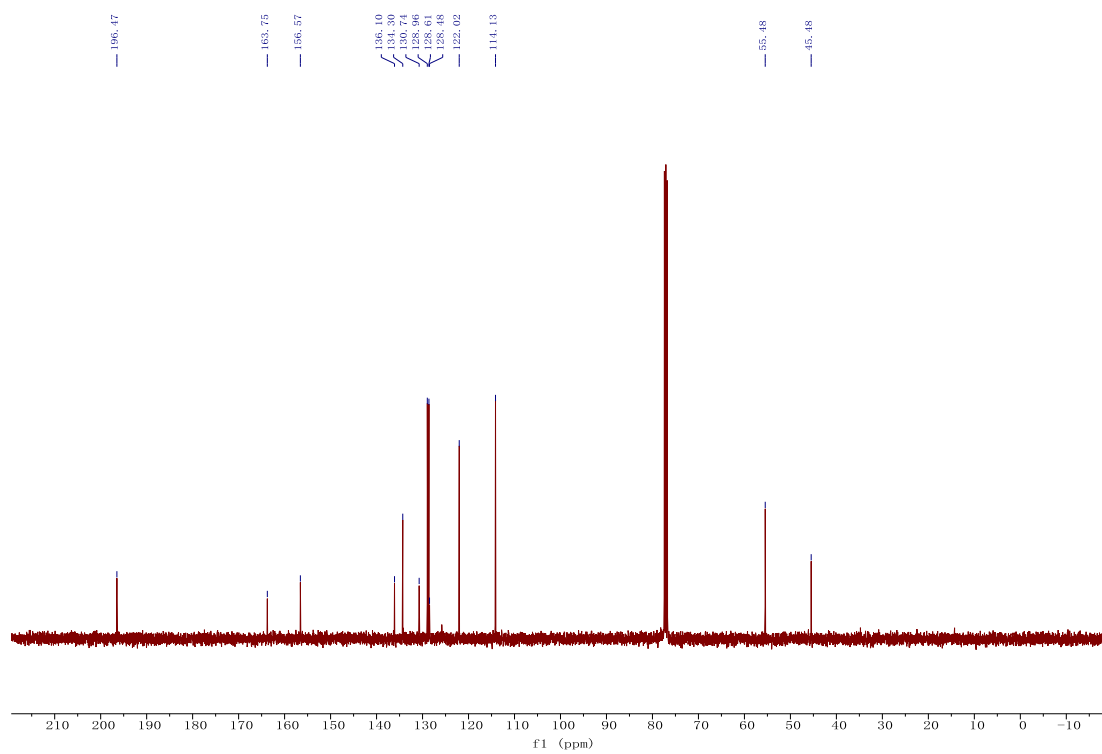

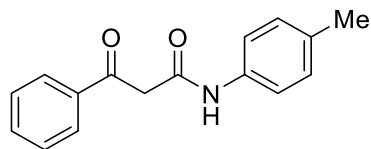

2m

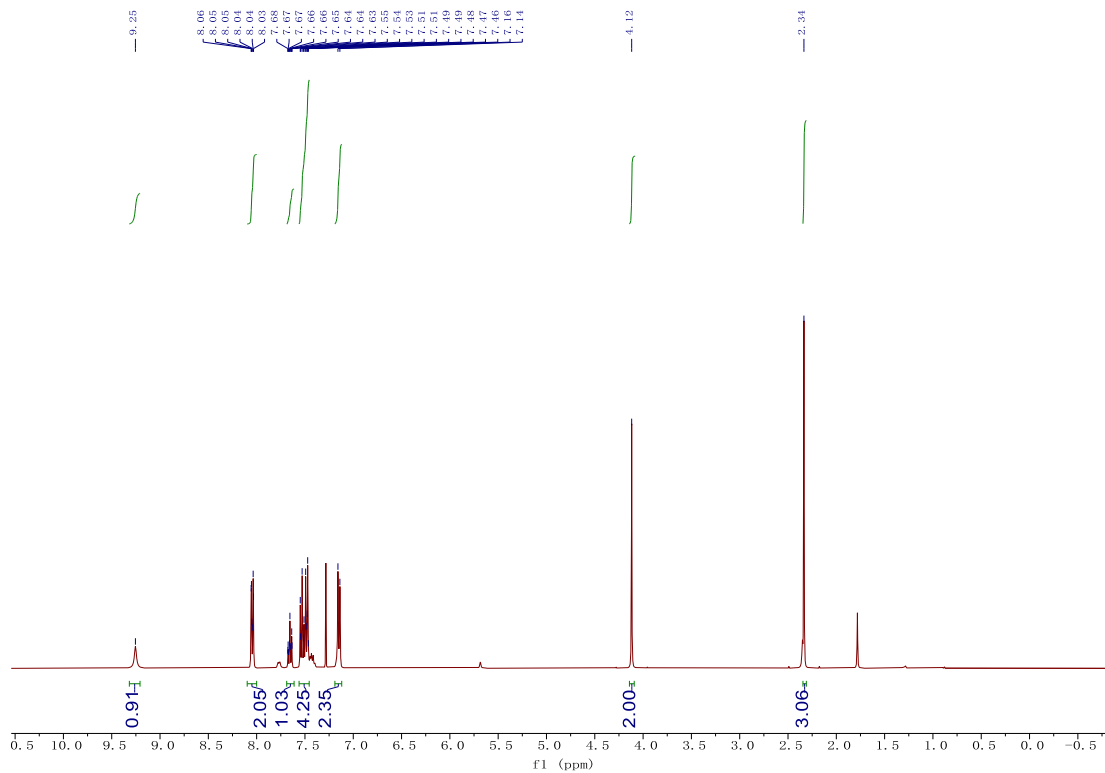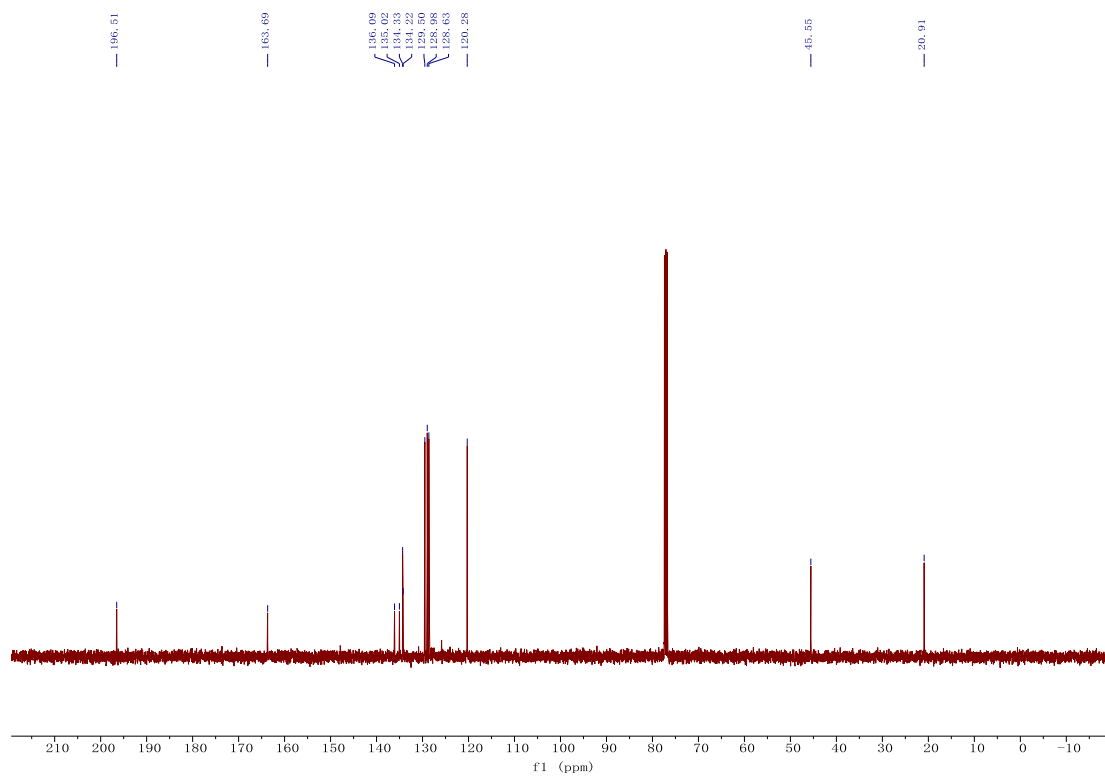

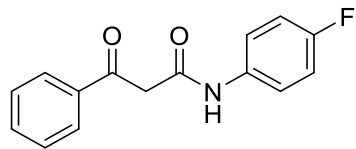

**2n**

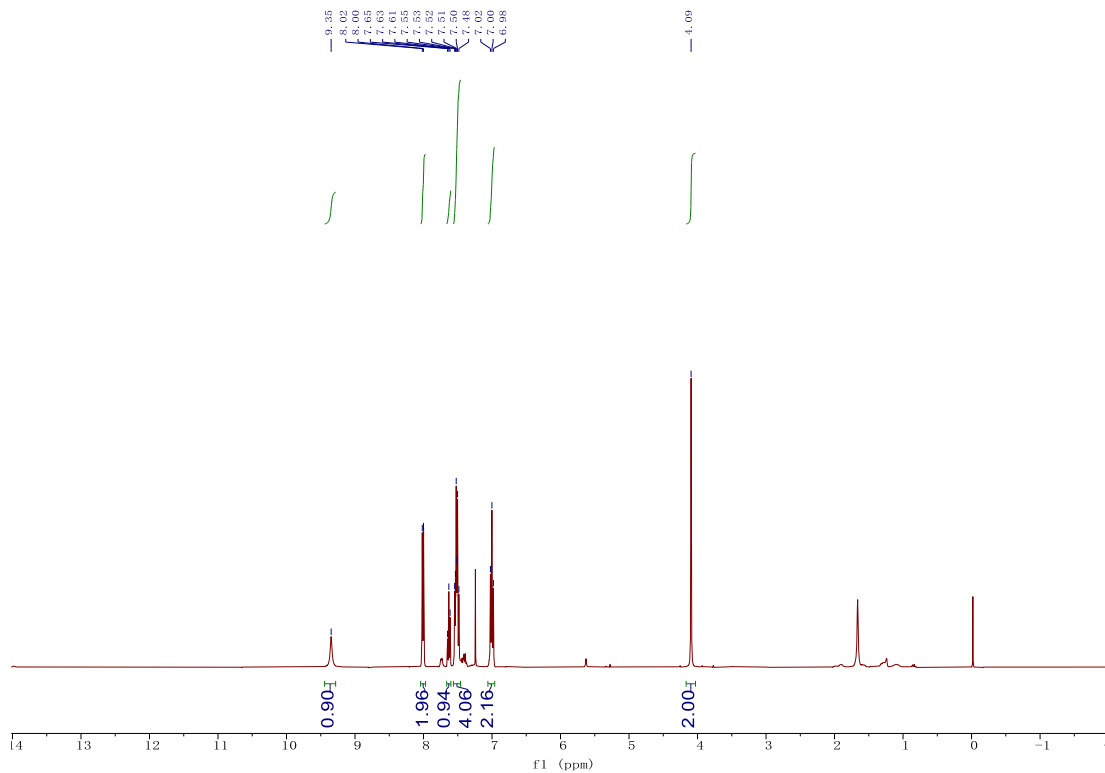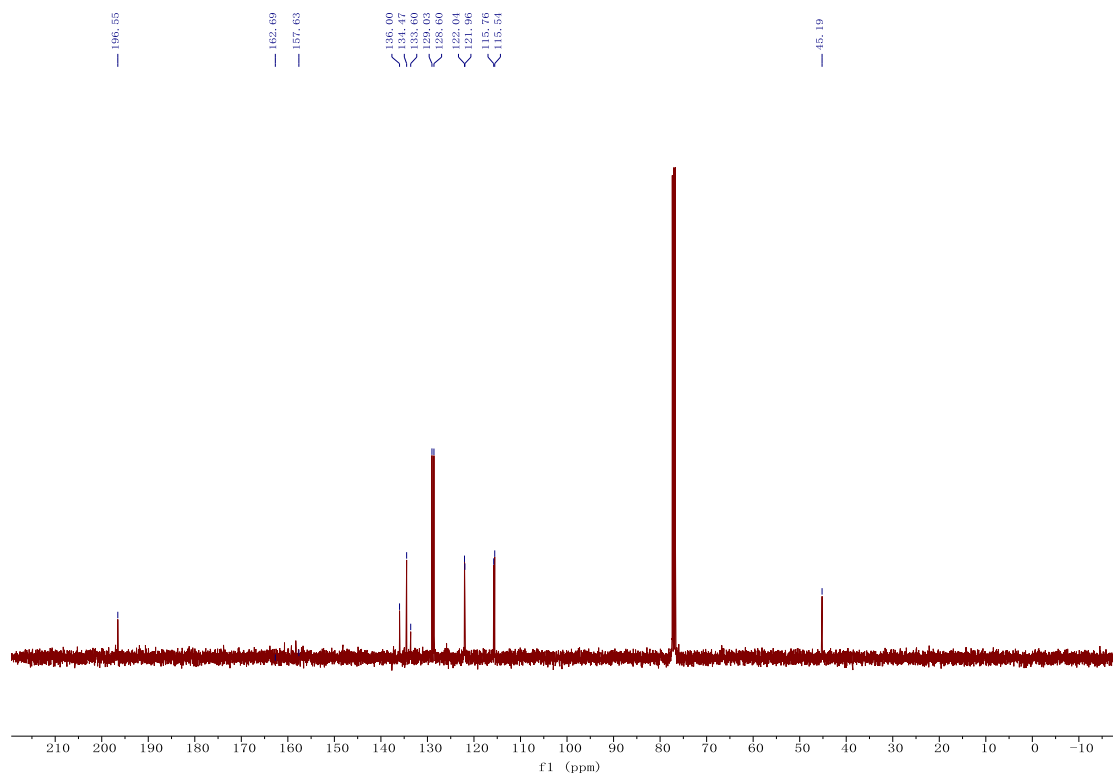

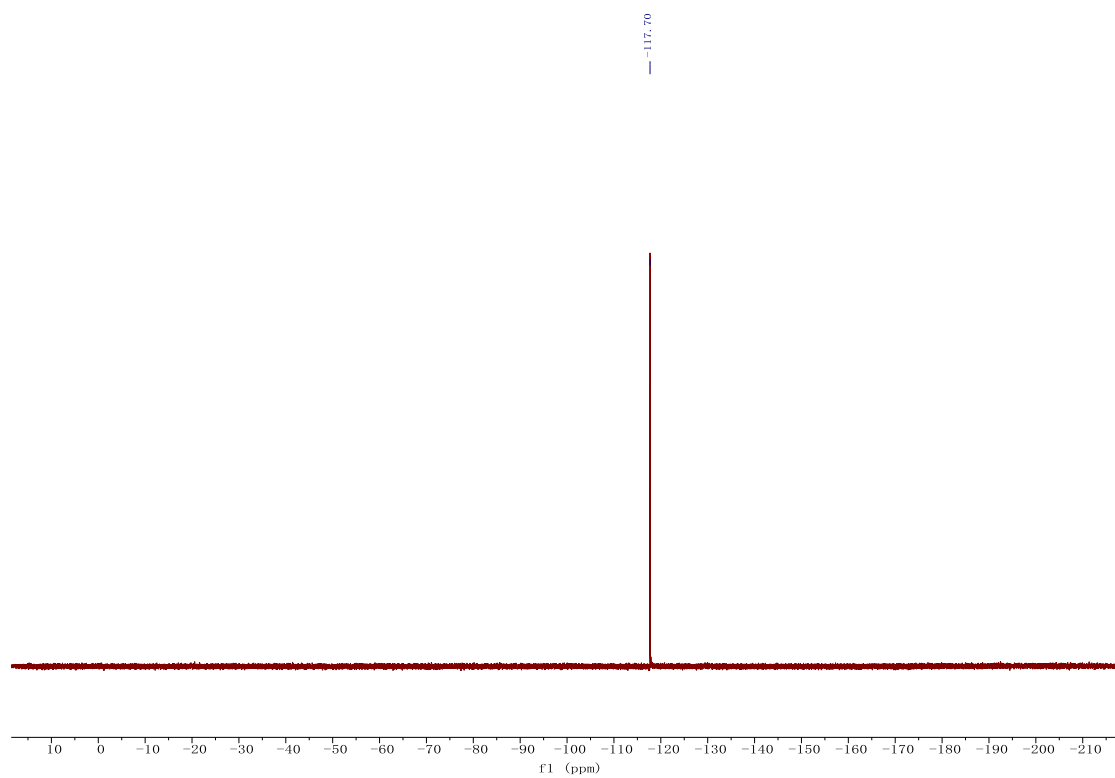

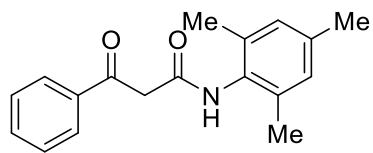

2o

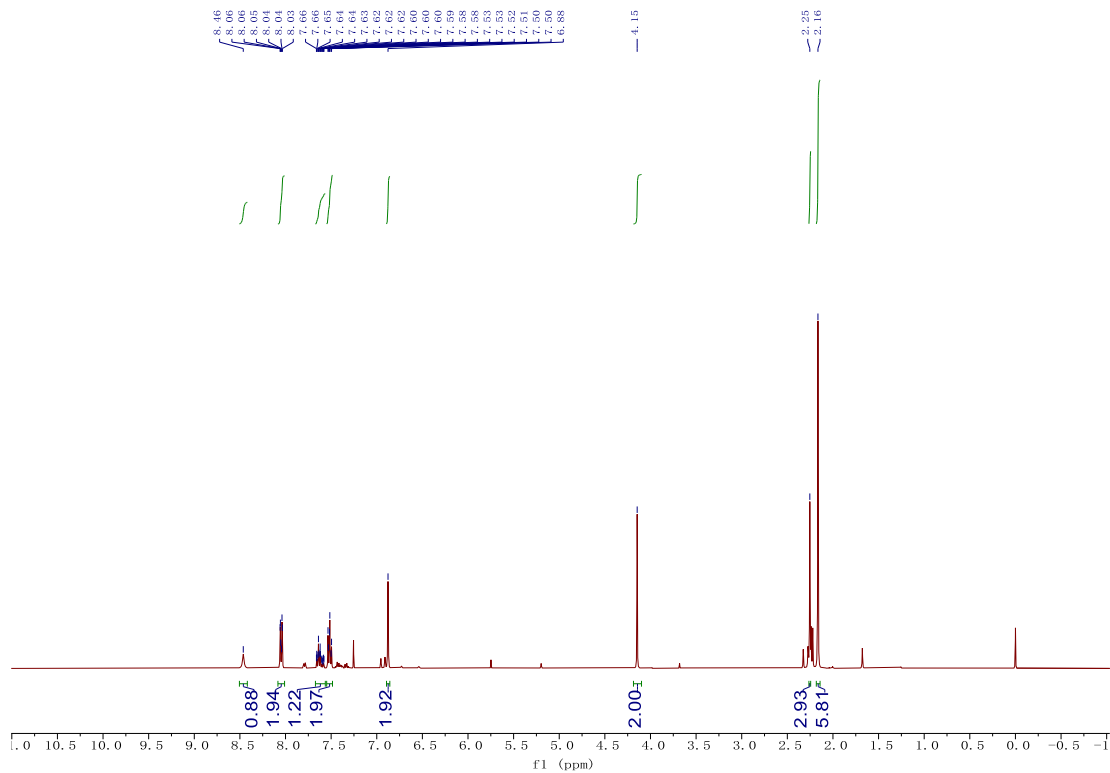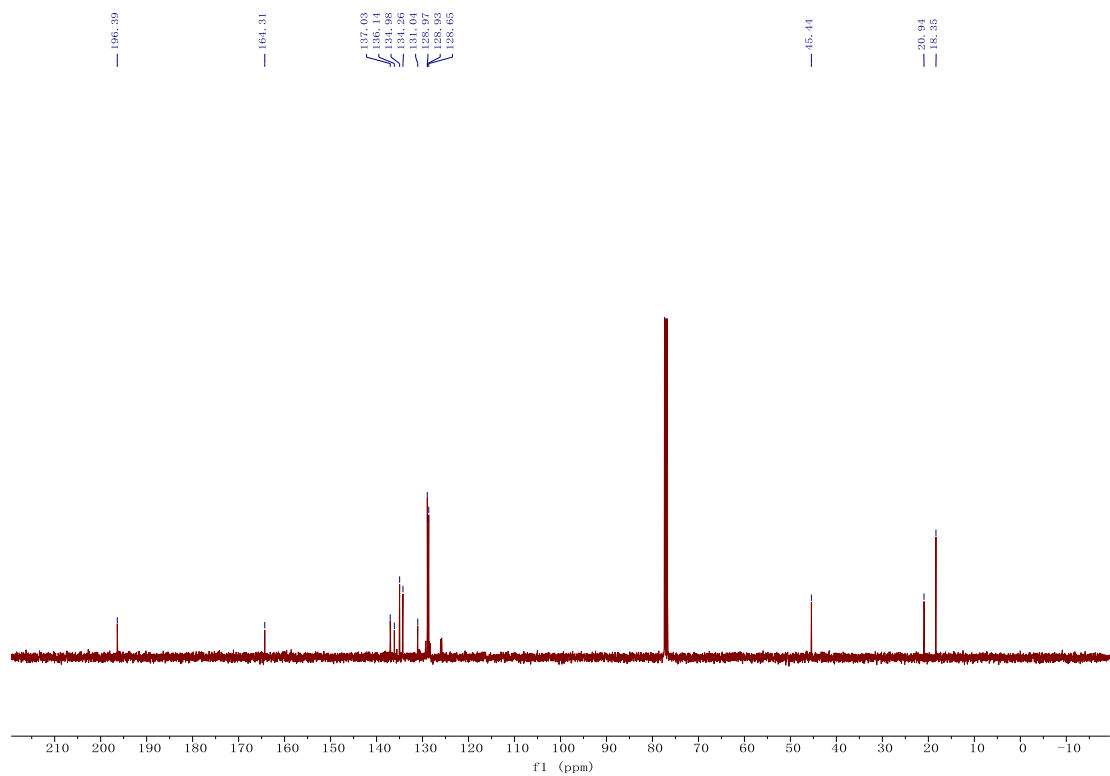

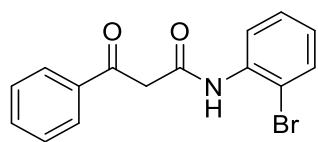

**2p**

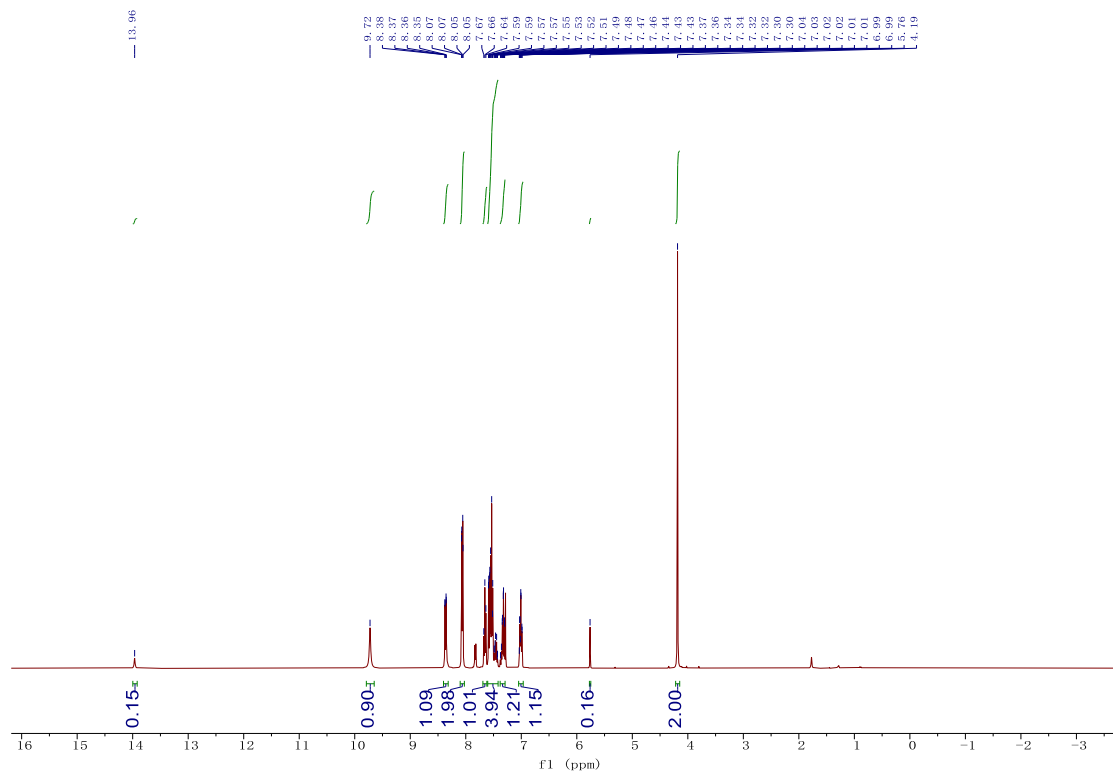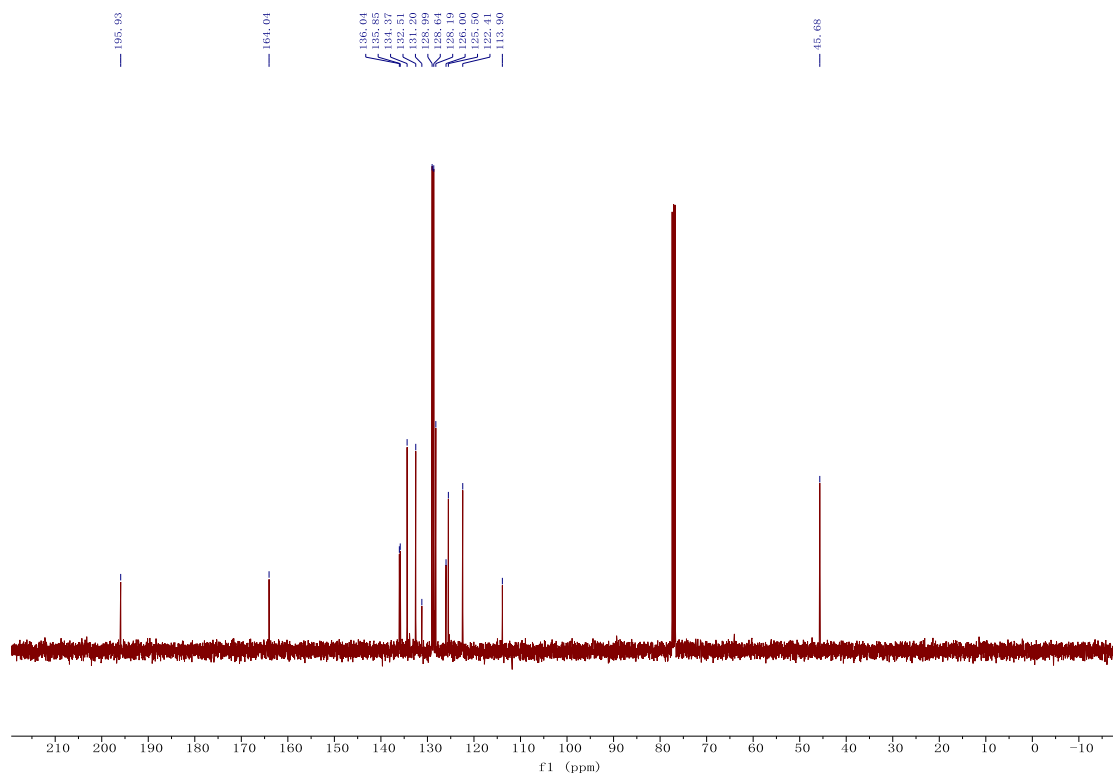

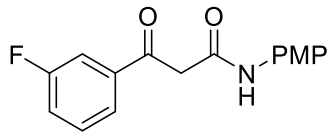

**2q**

Analysis for ketone:

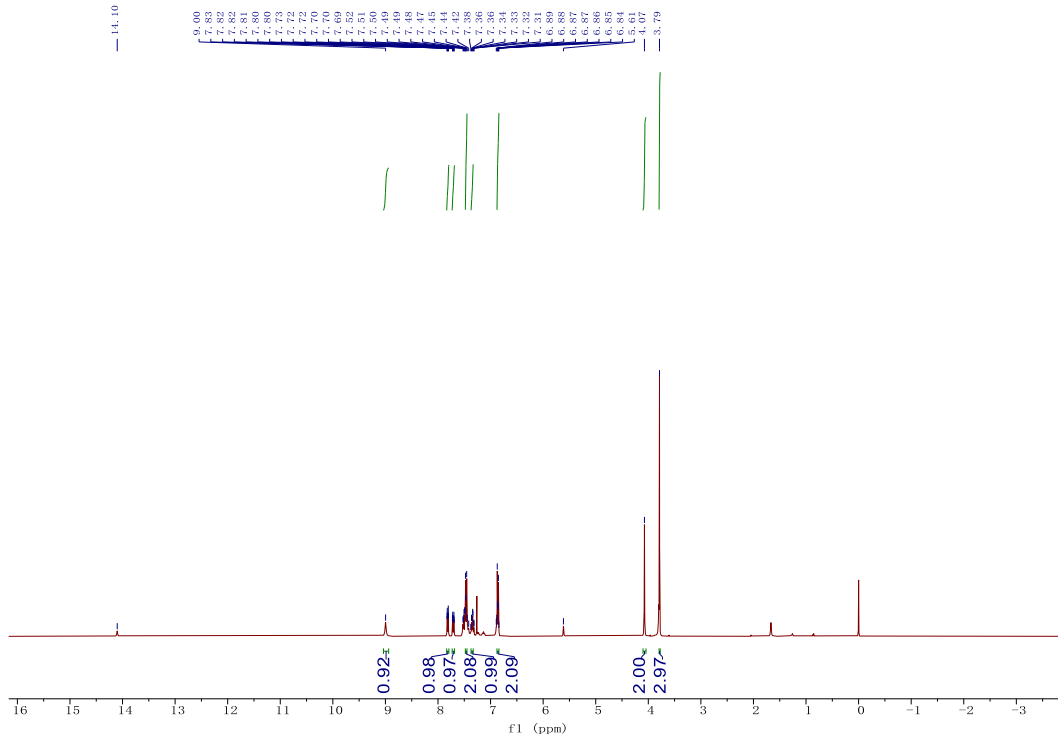

Analysis for enol:

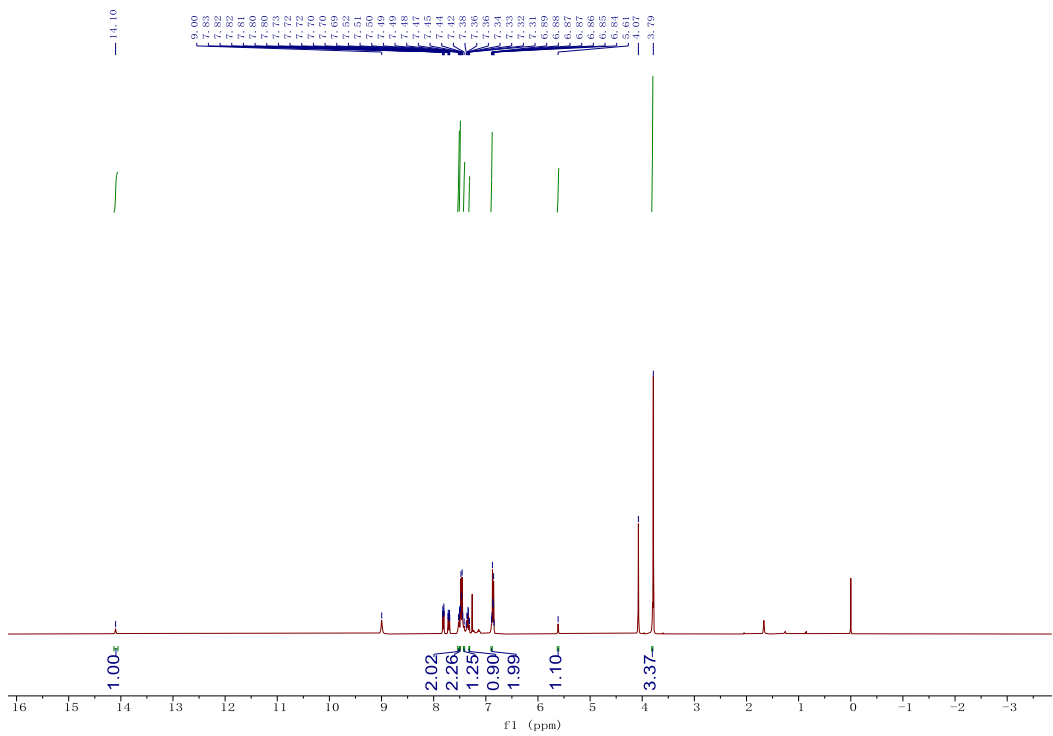

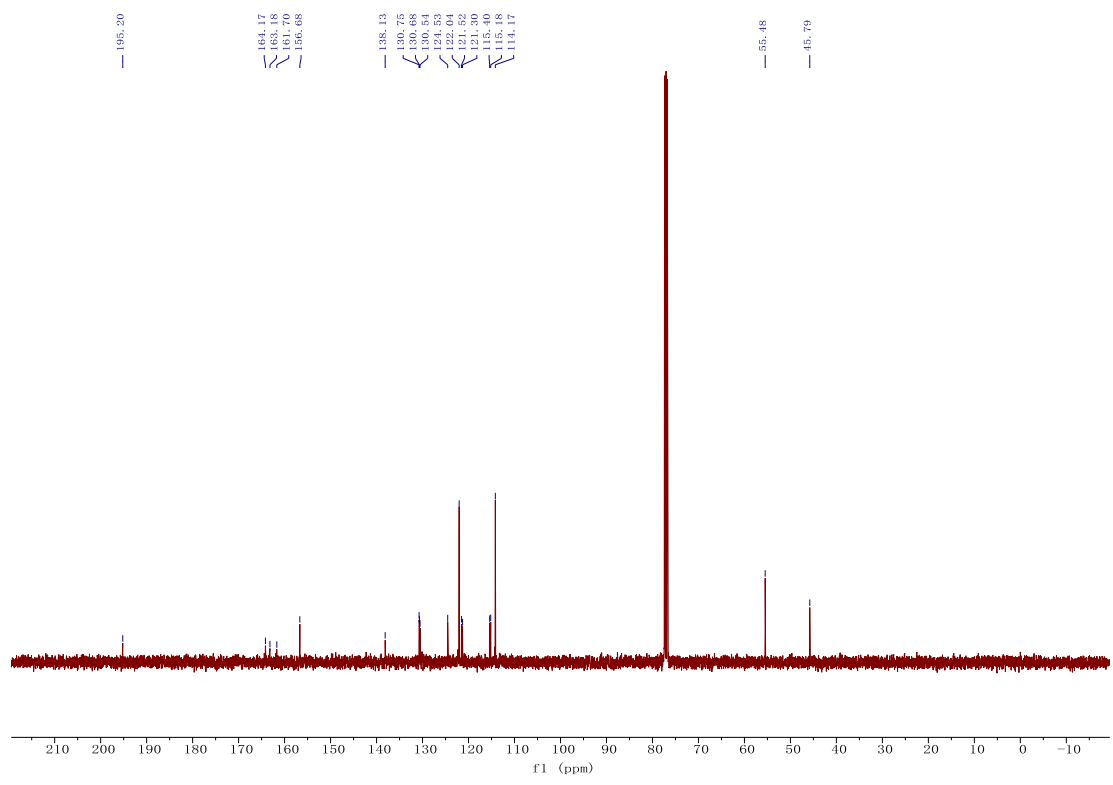



Analysis for ketone:

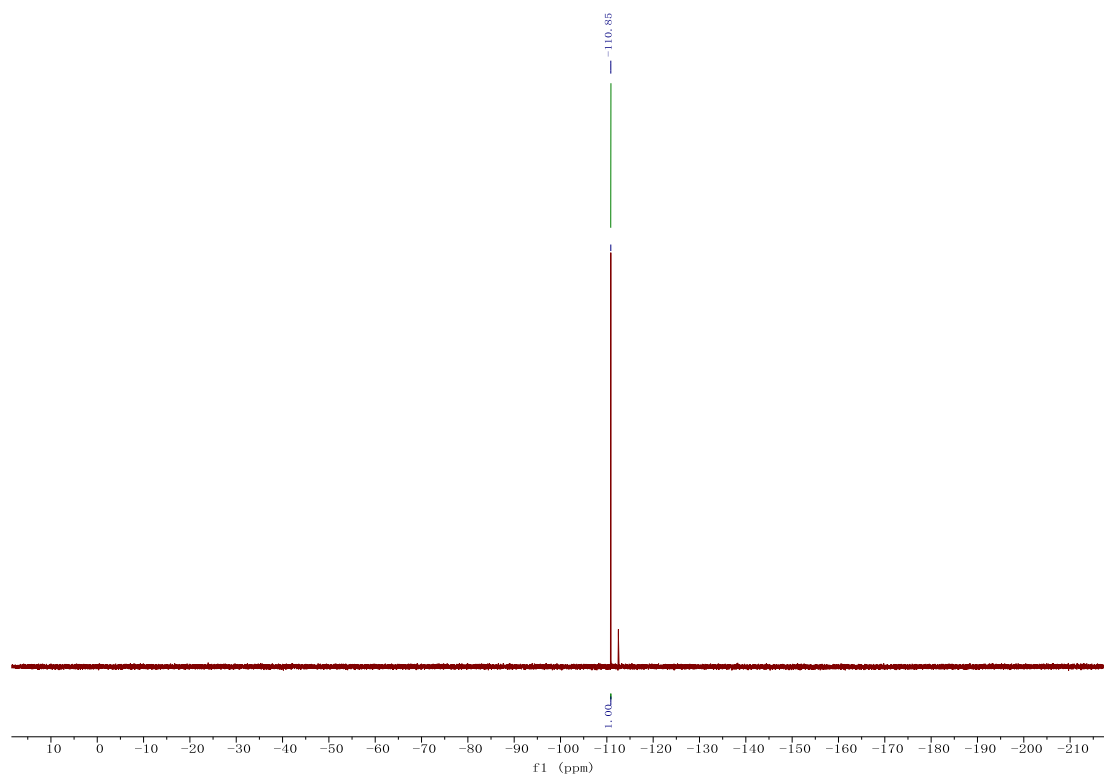

Analysis for enol:

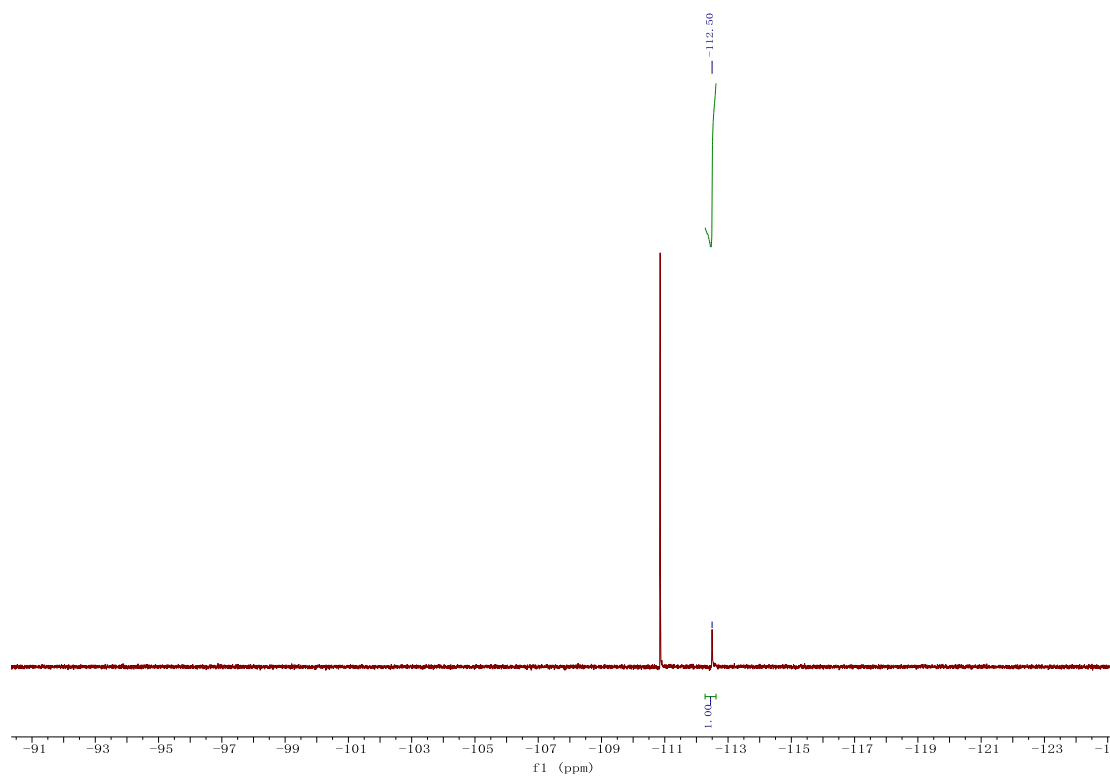

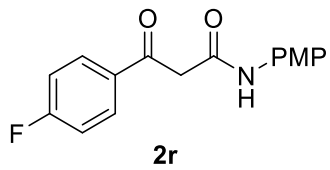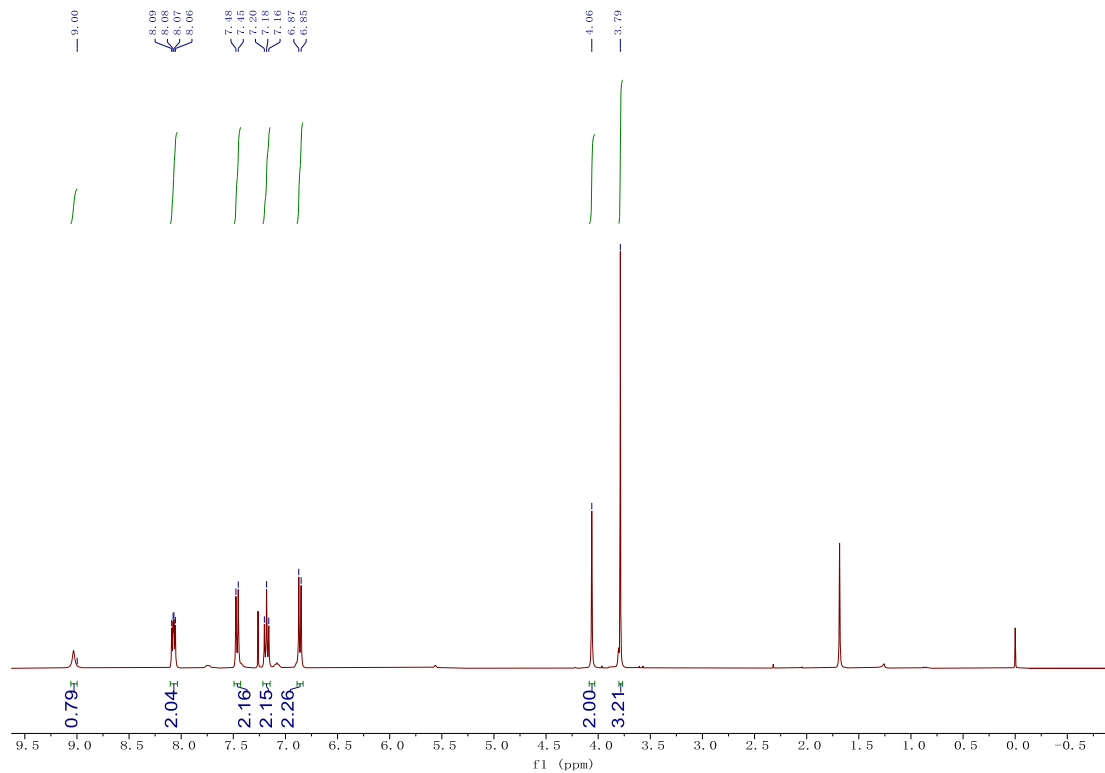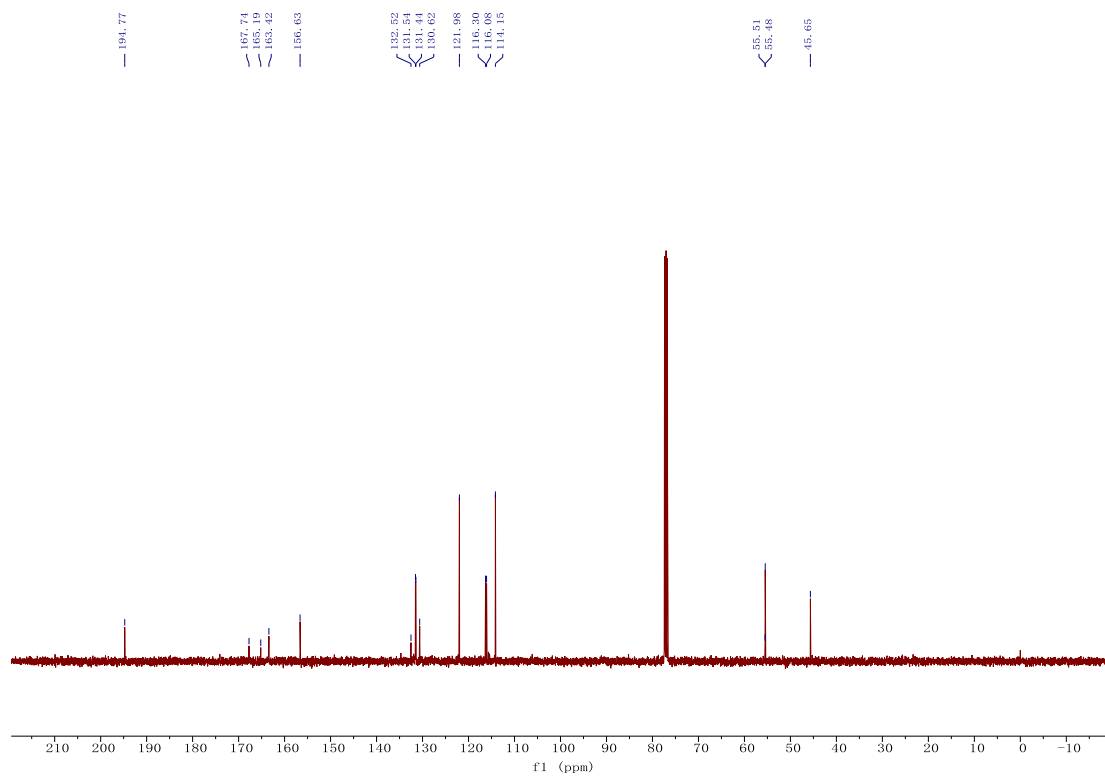

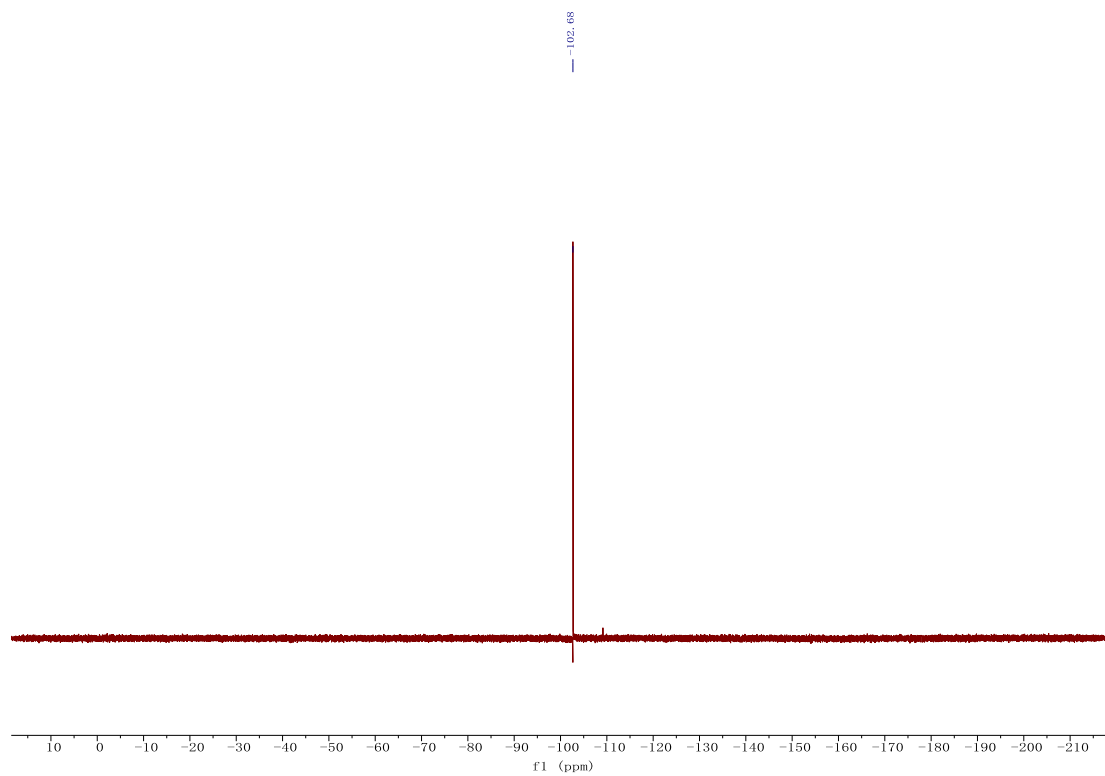

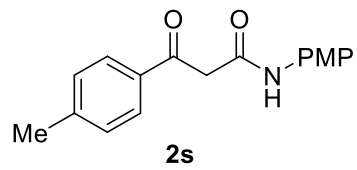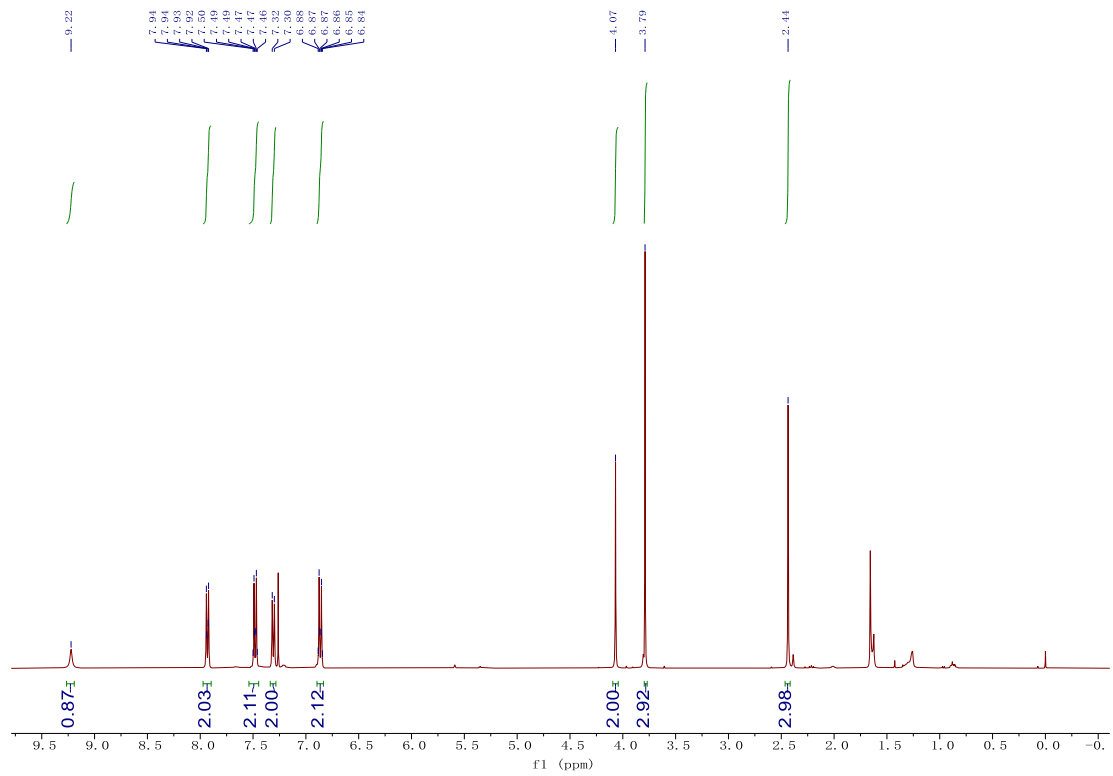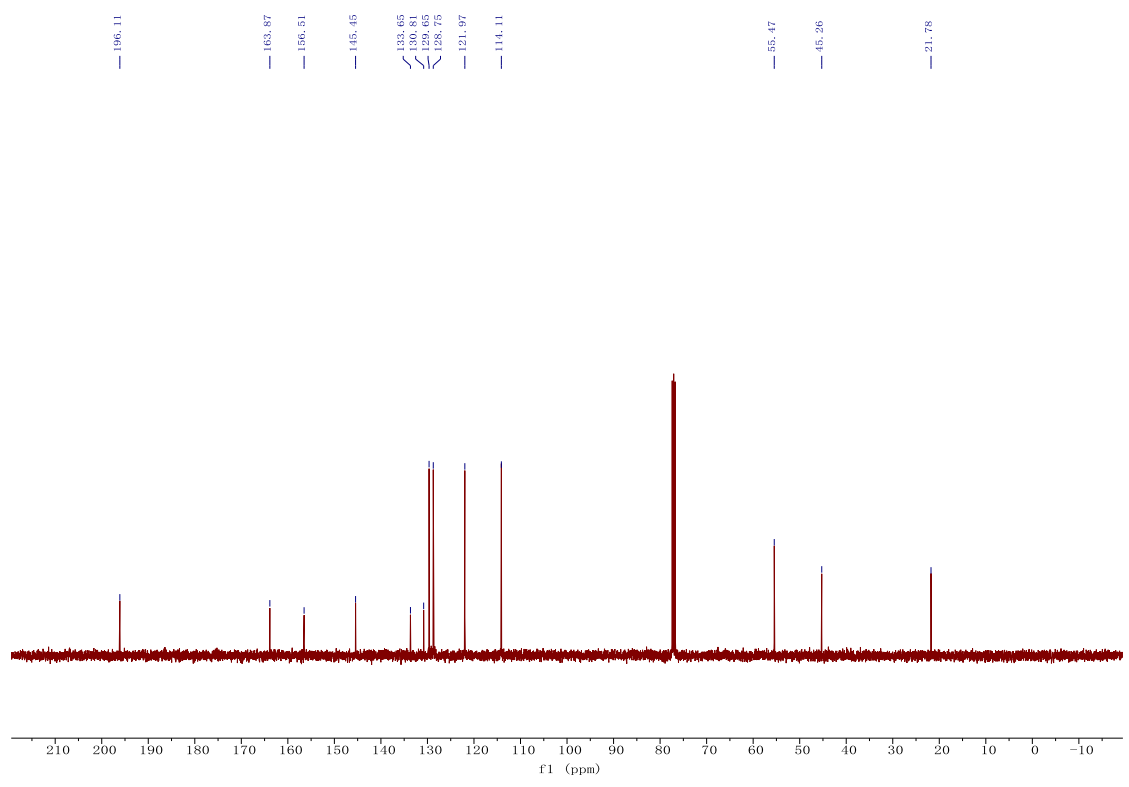

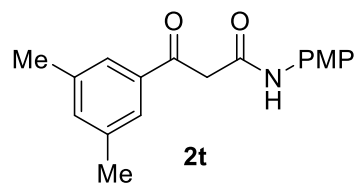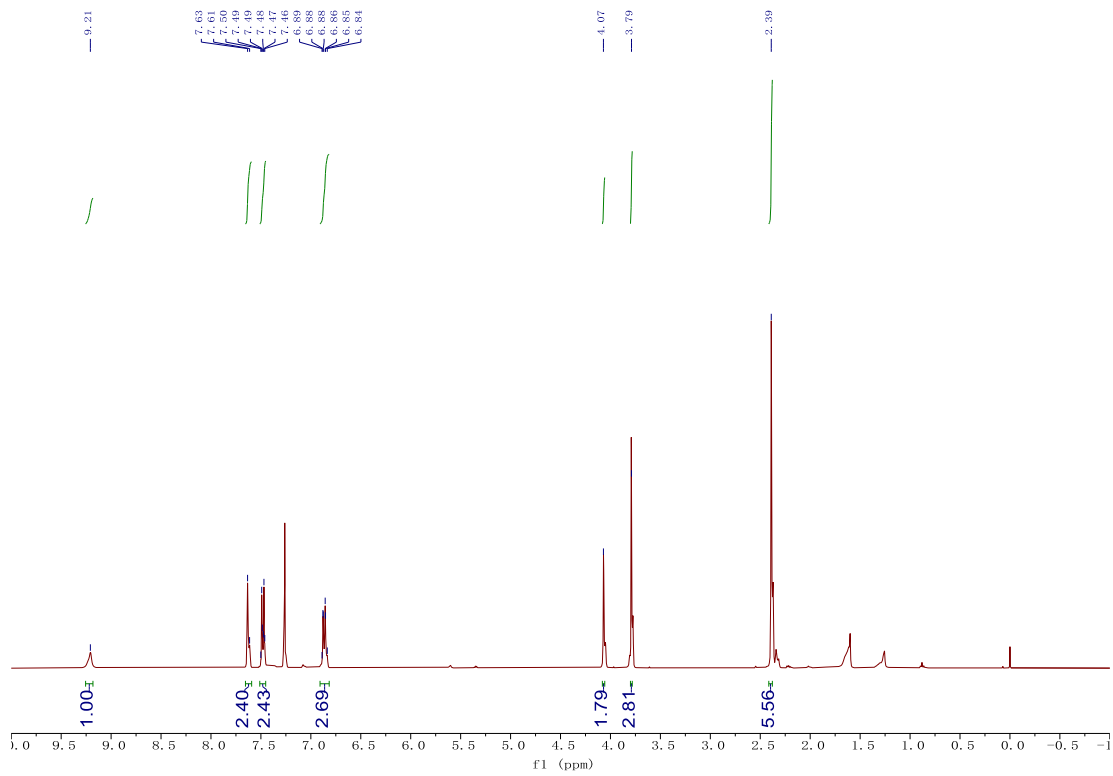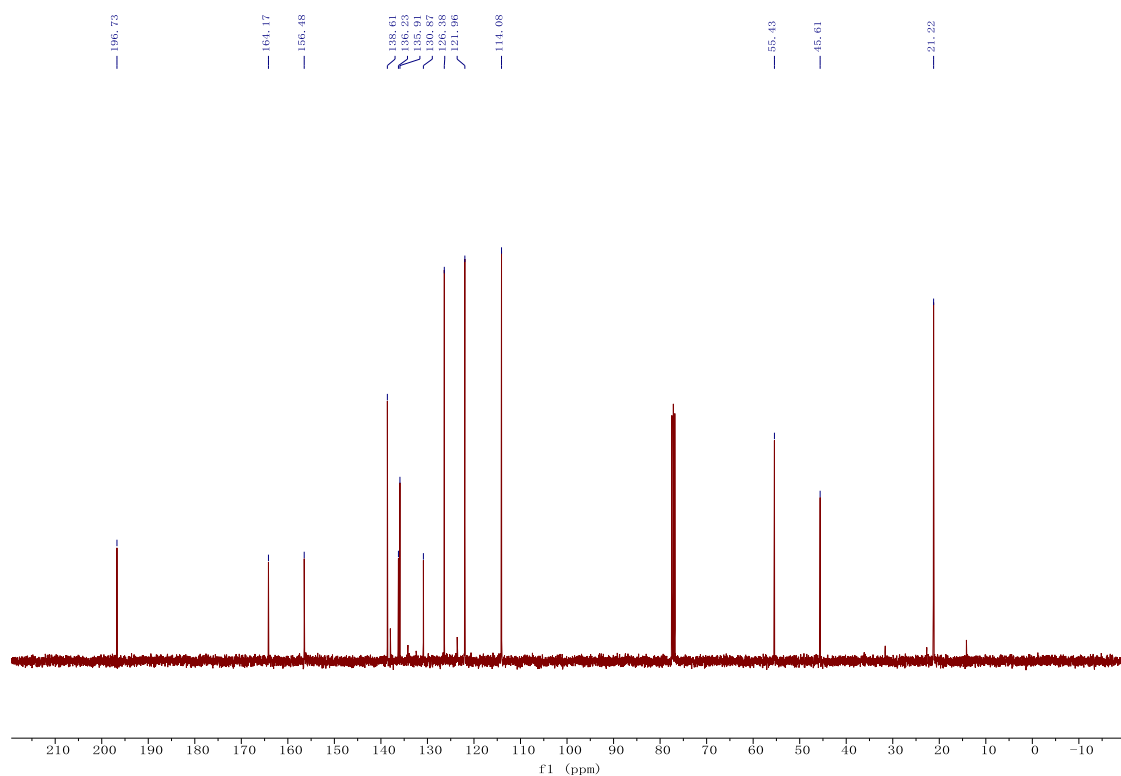

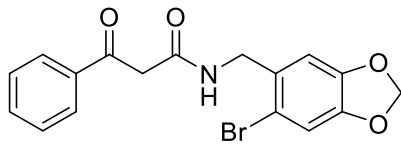

2v

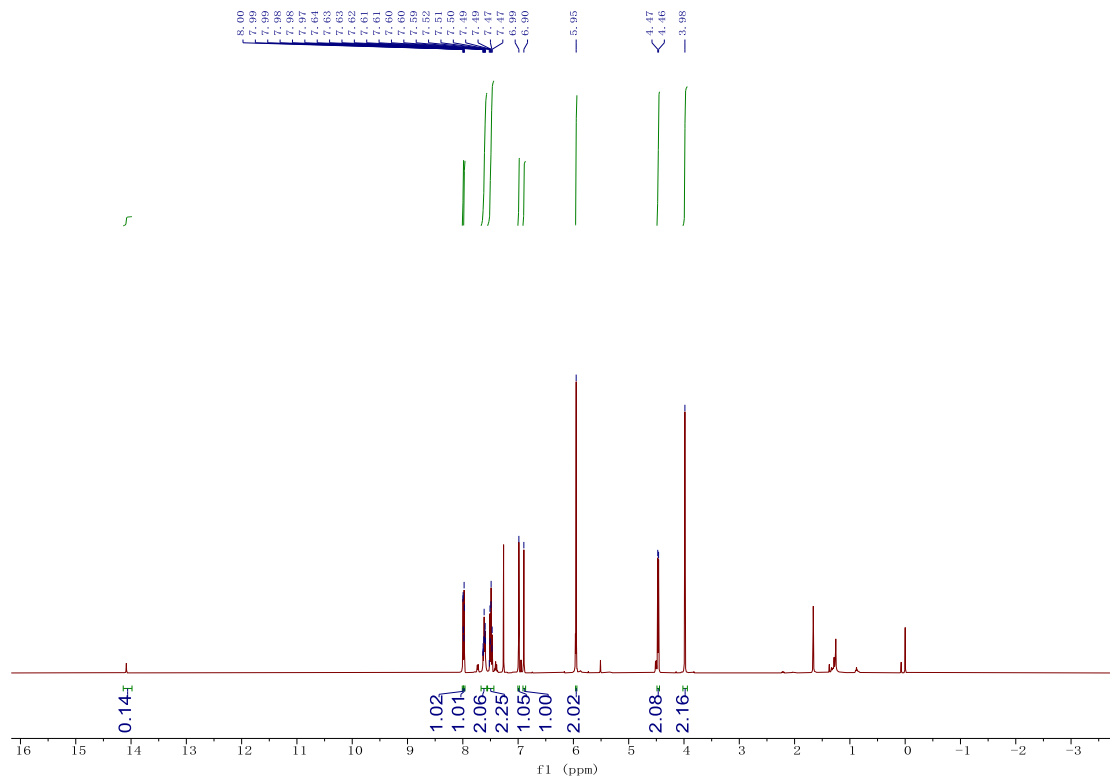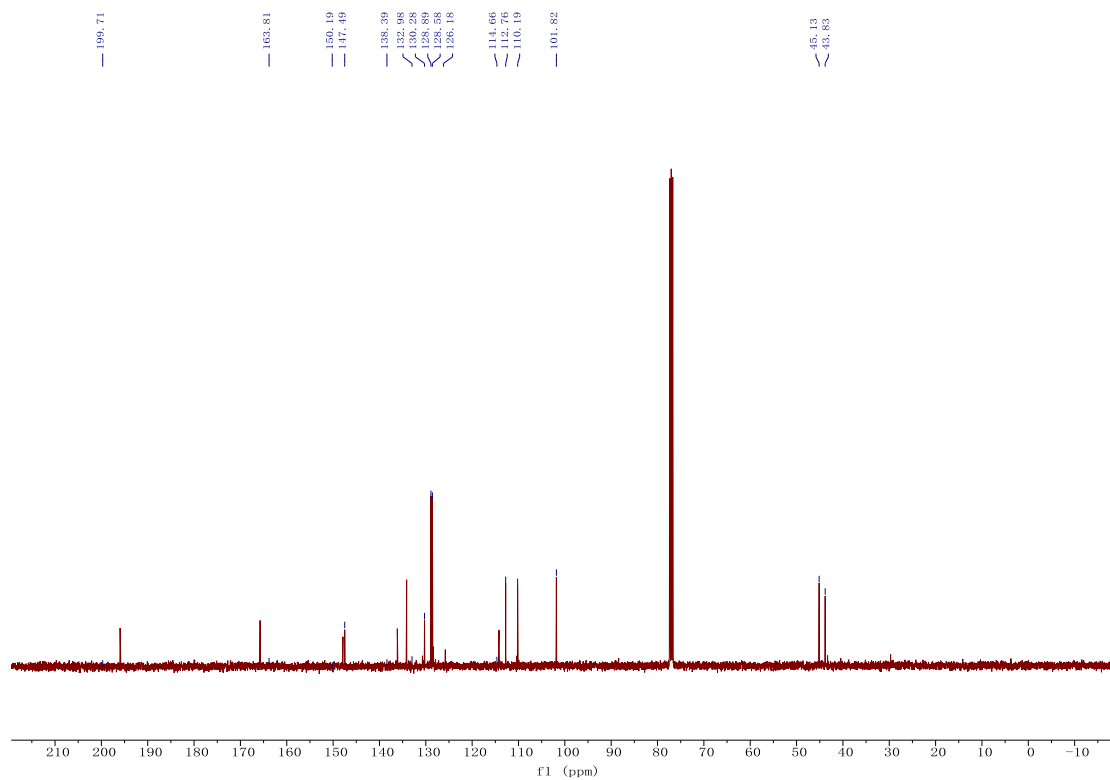

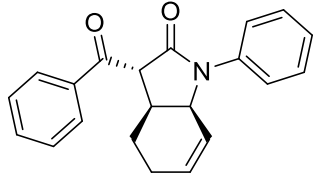

**3a**

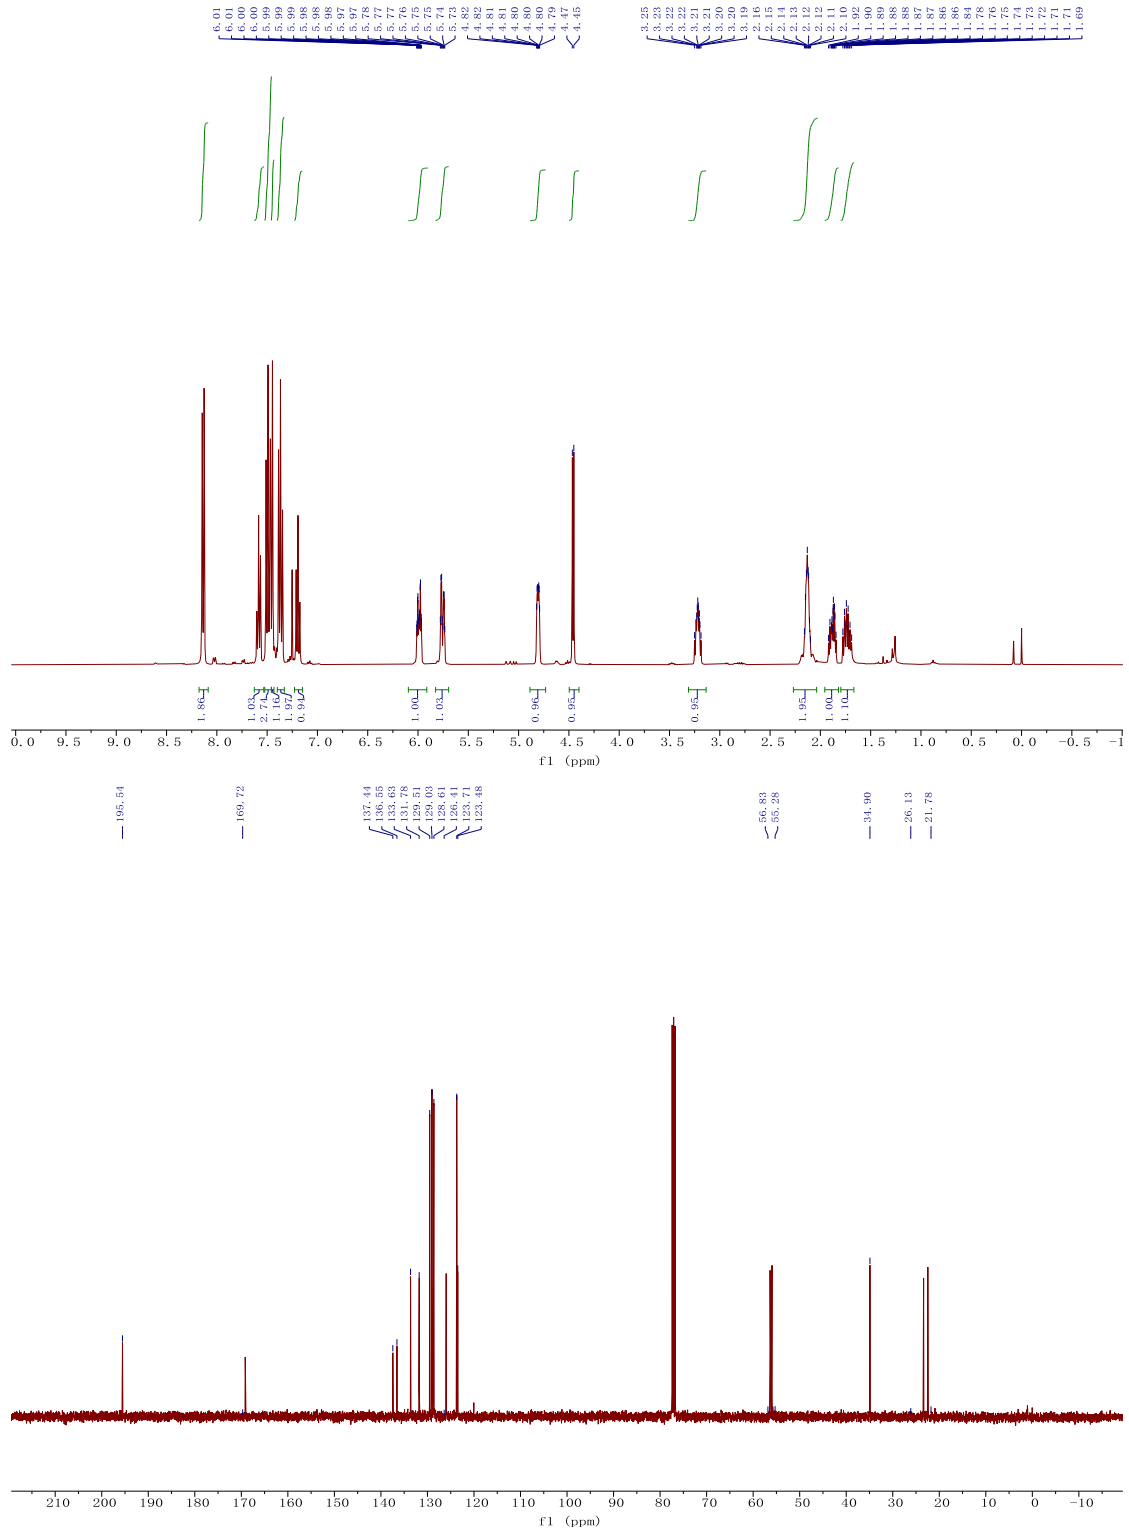

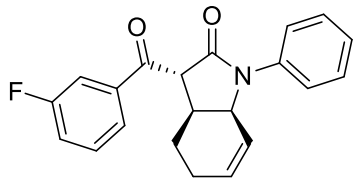

**3b**

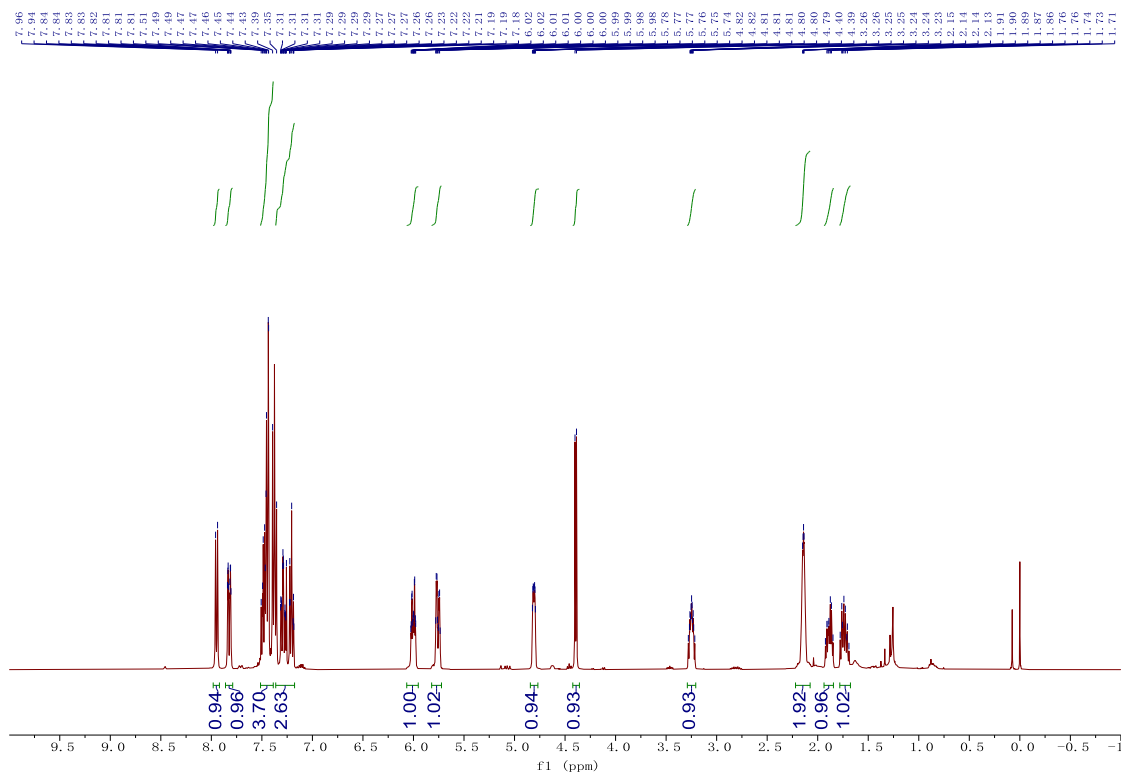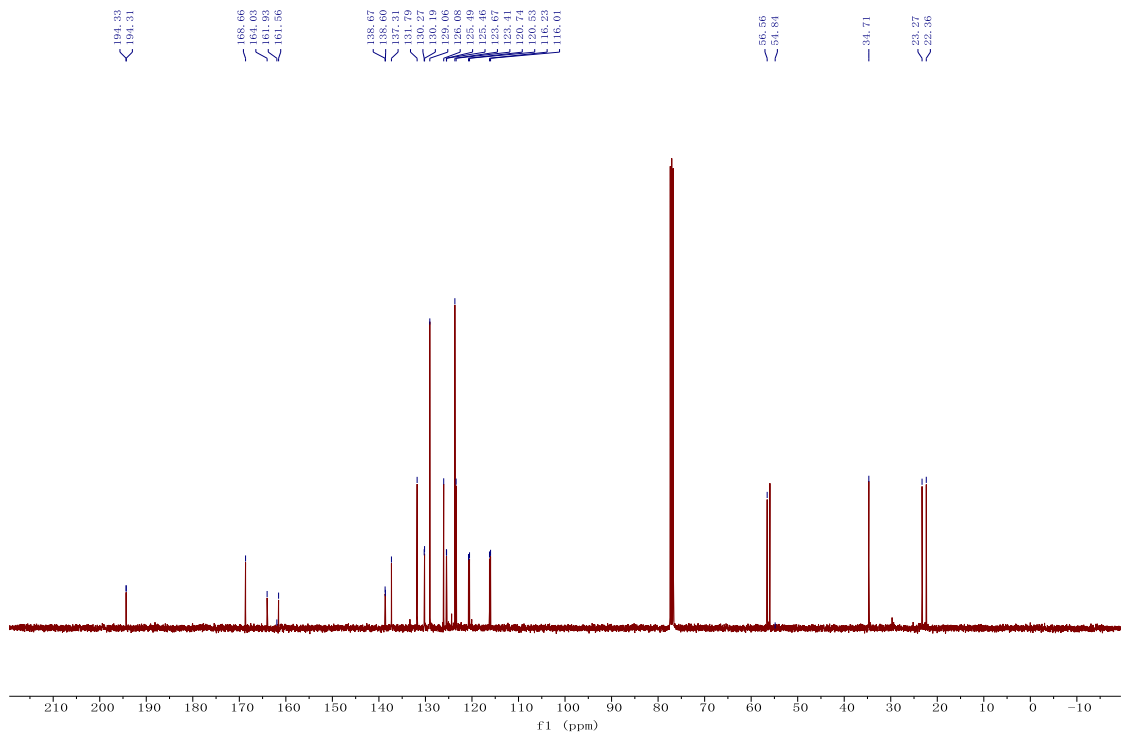



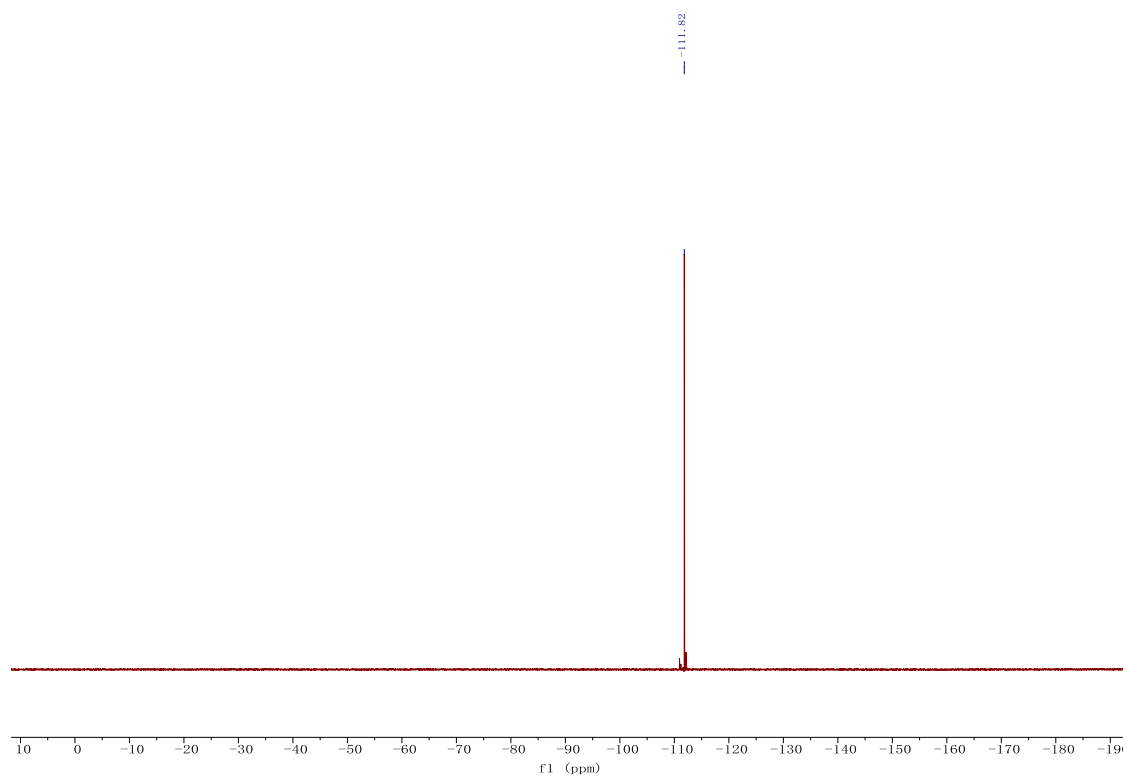

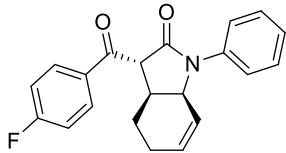

**3c**

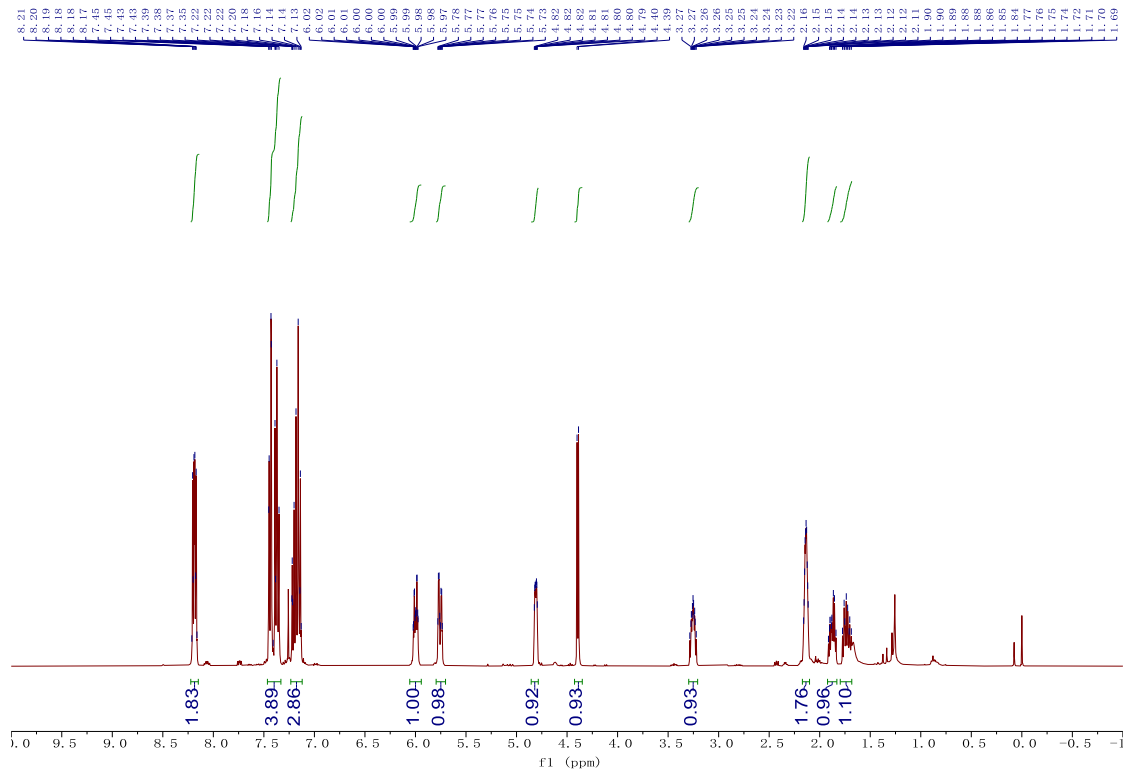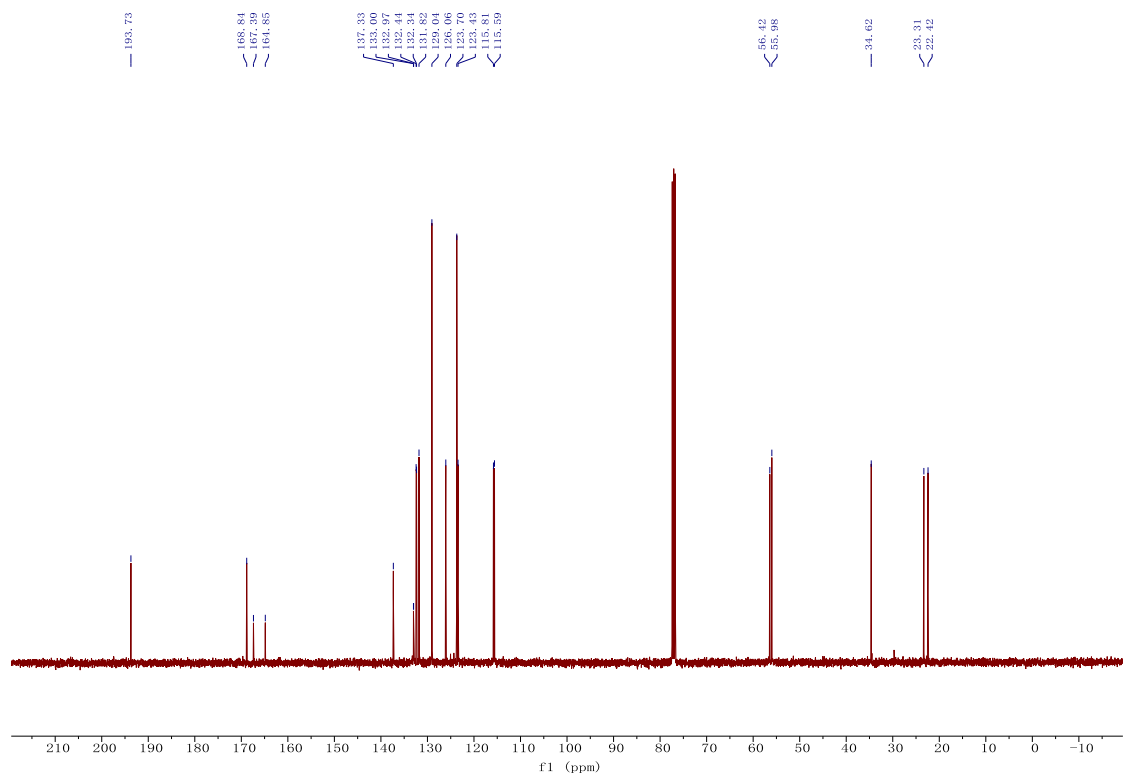

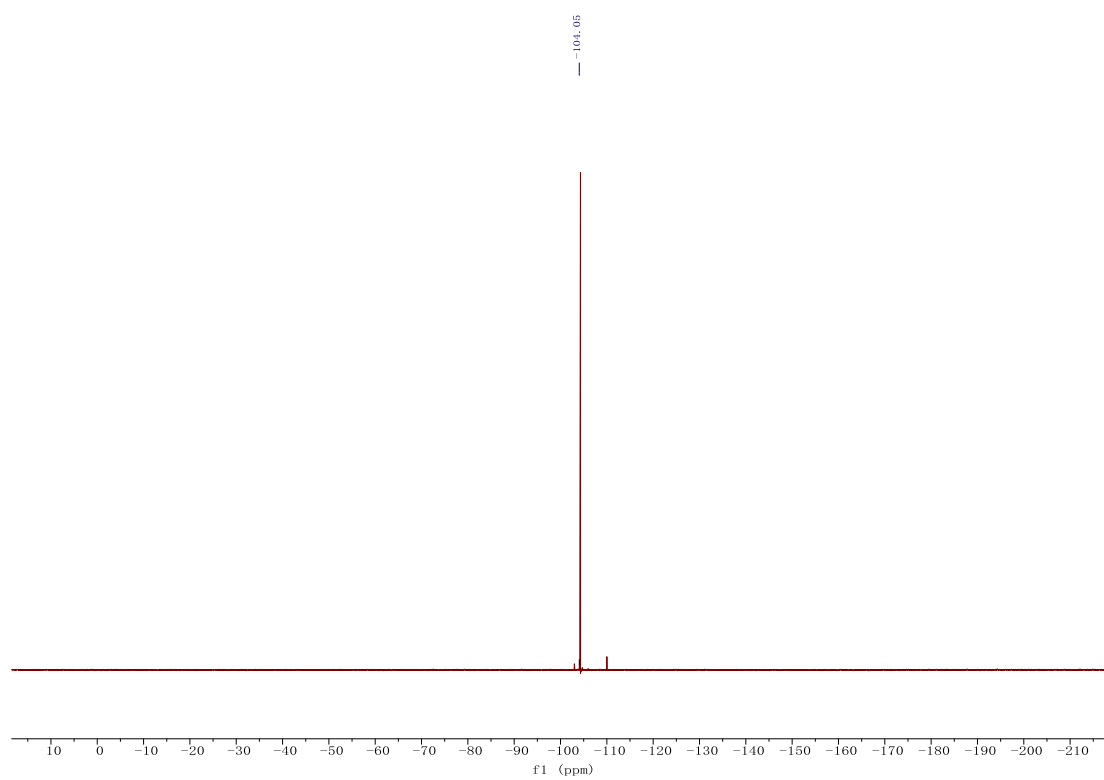

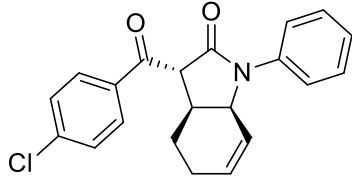

**3d**

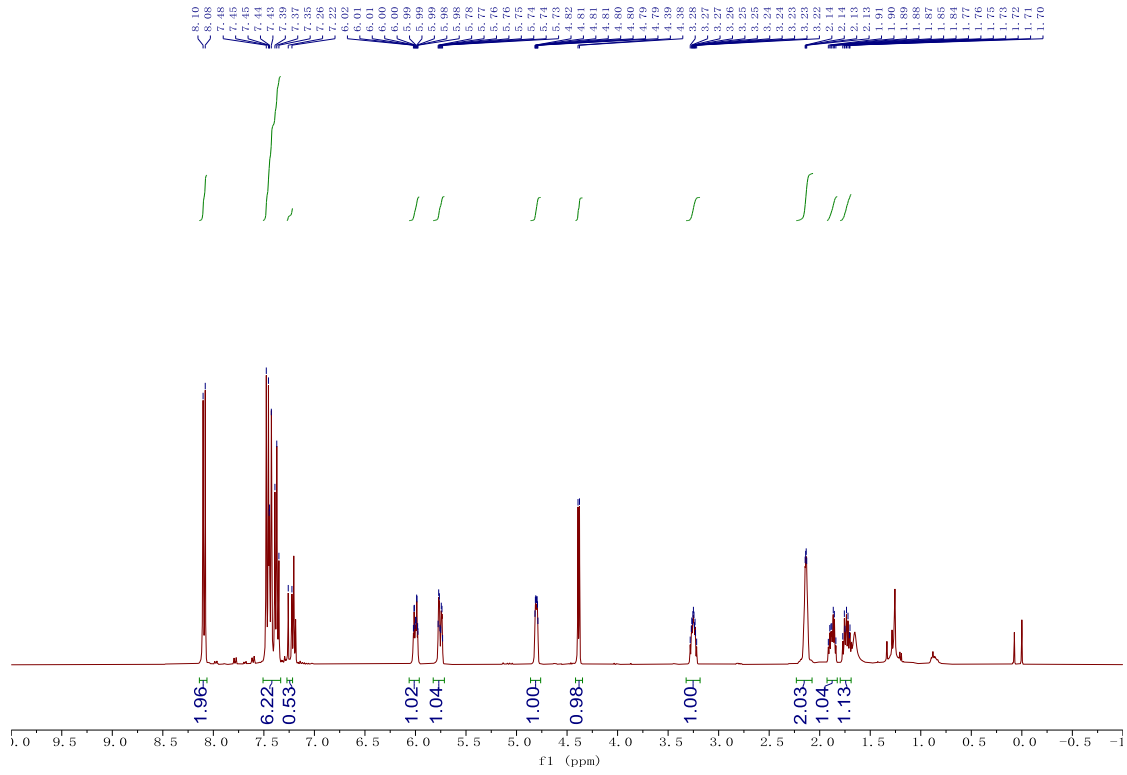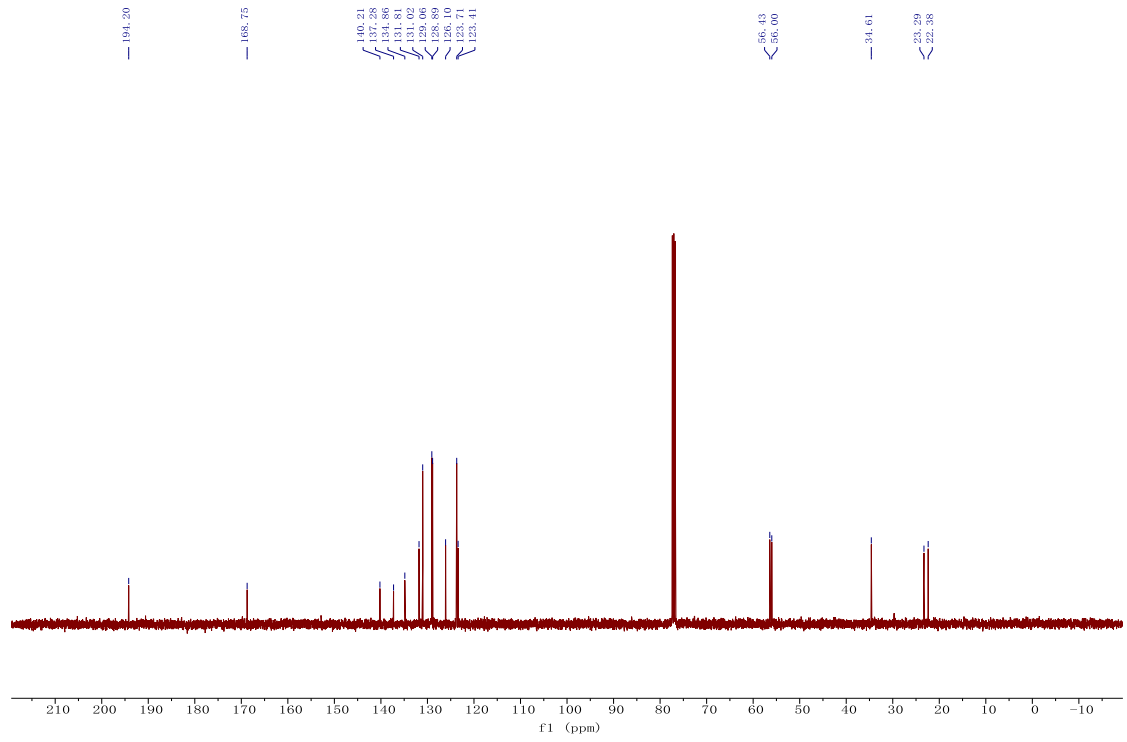



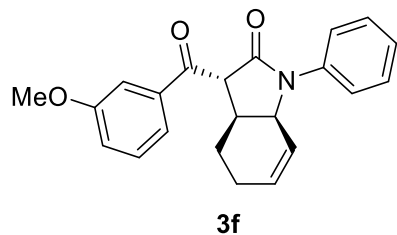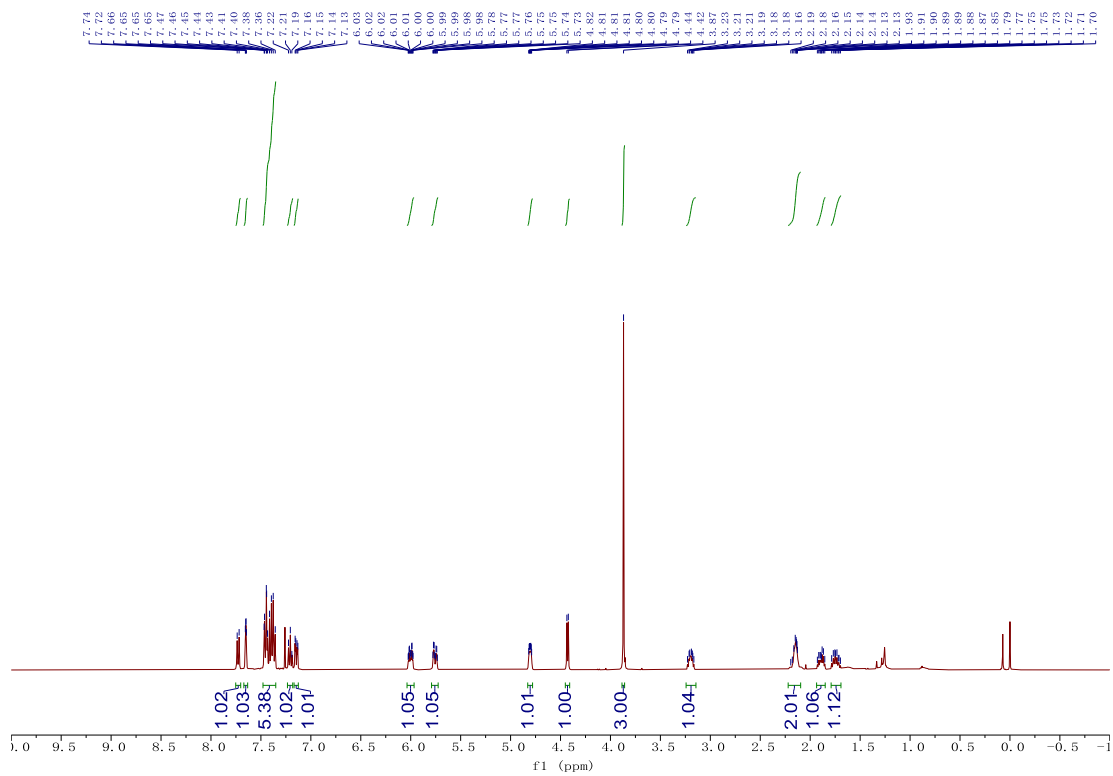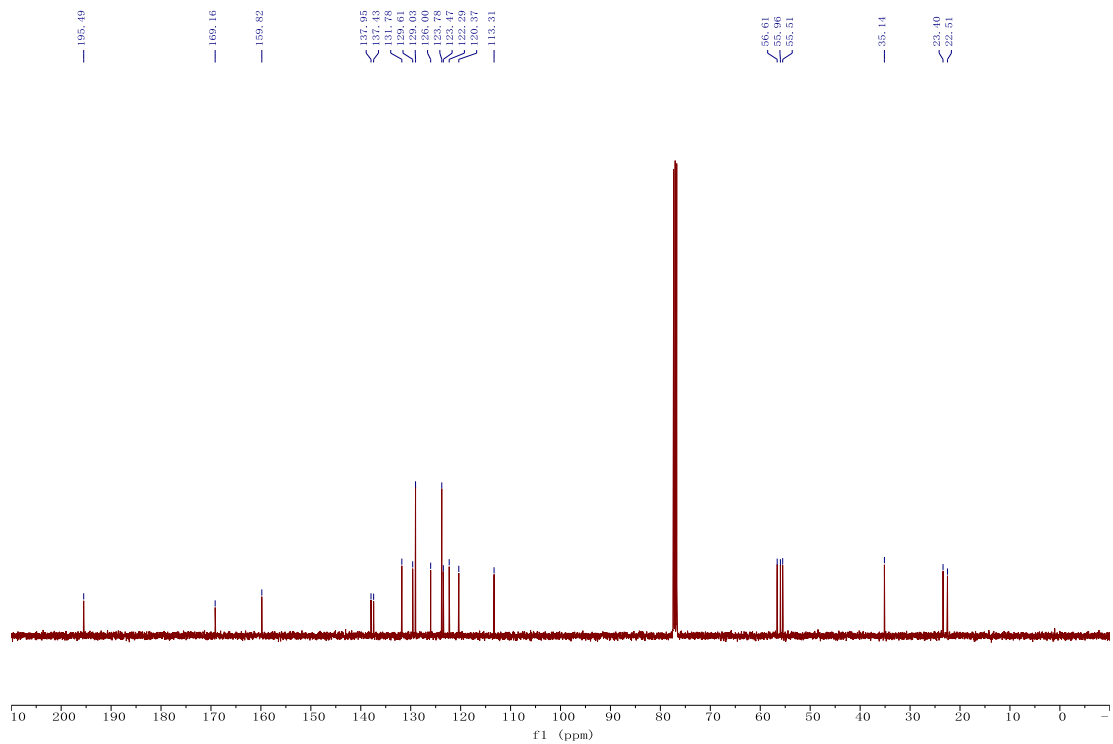

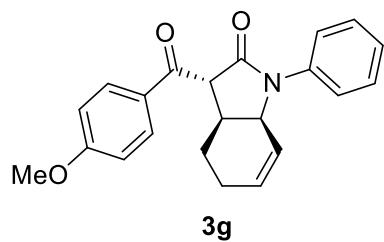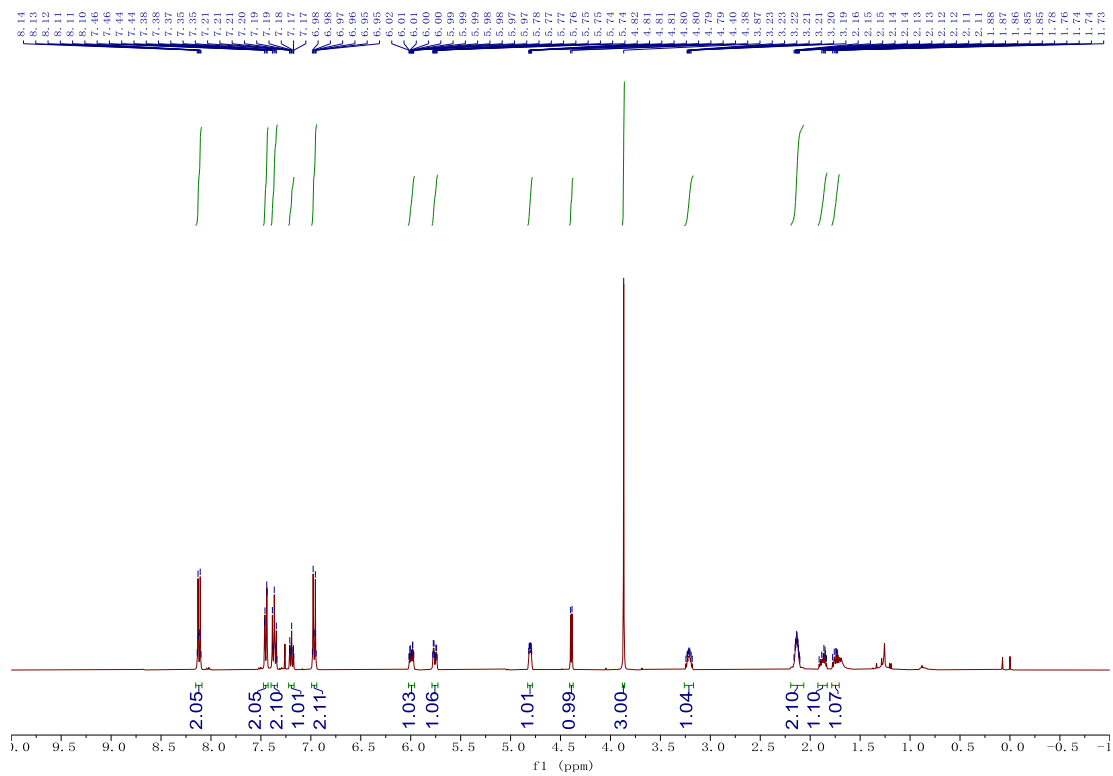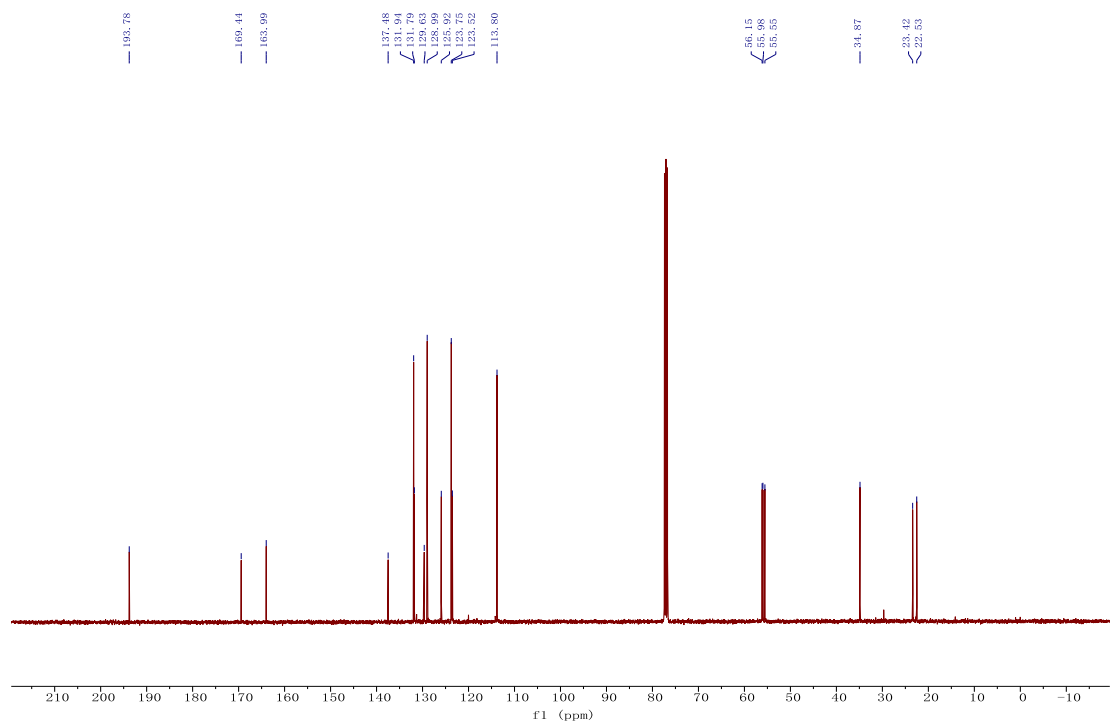





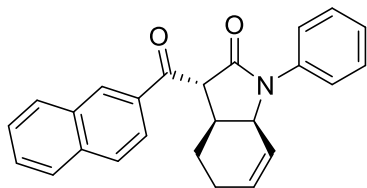

**3i**

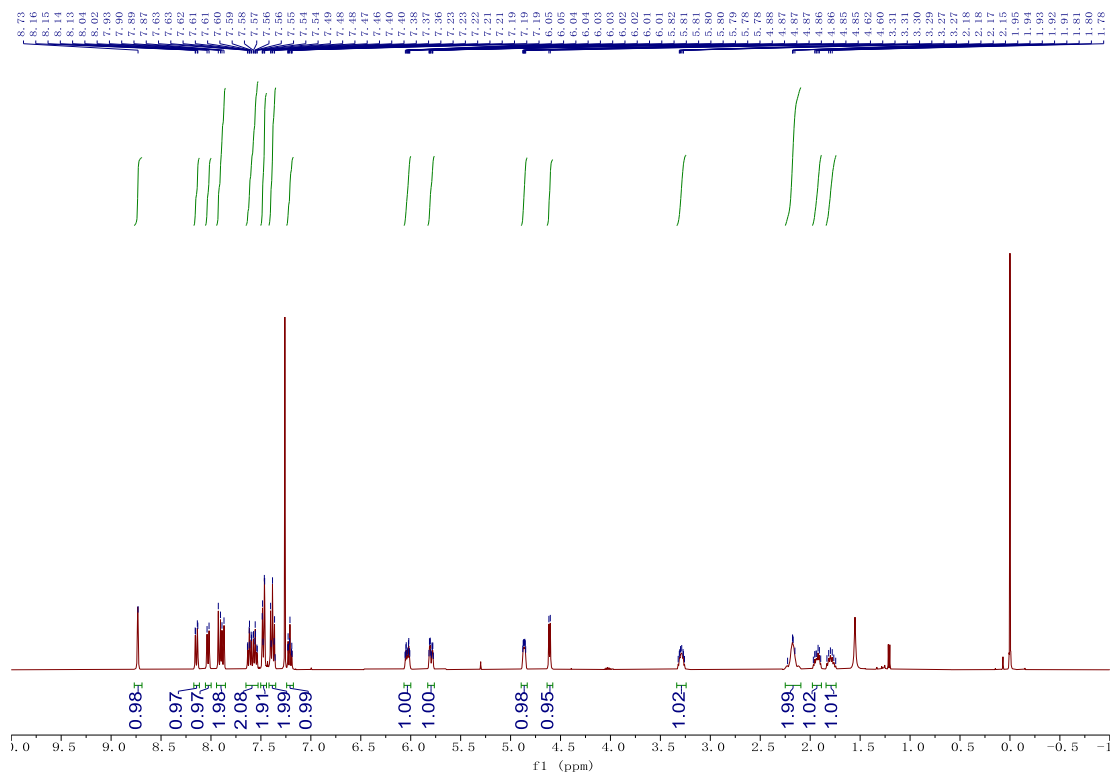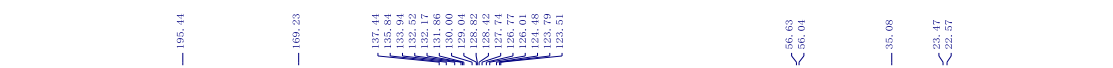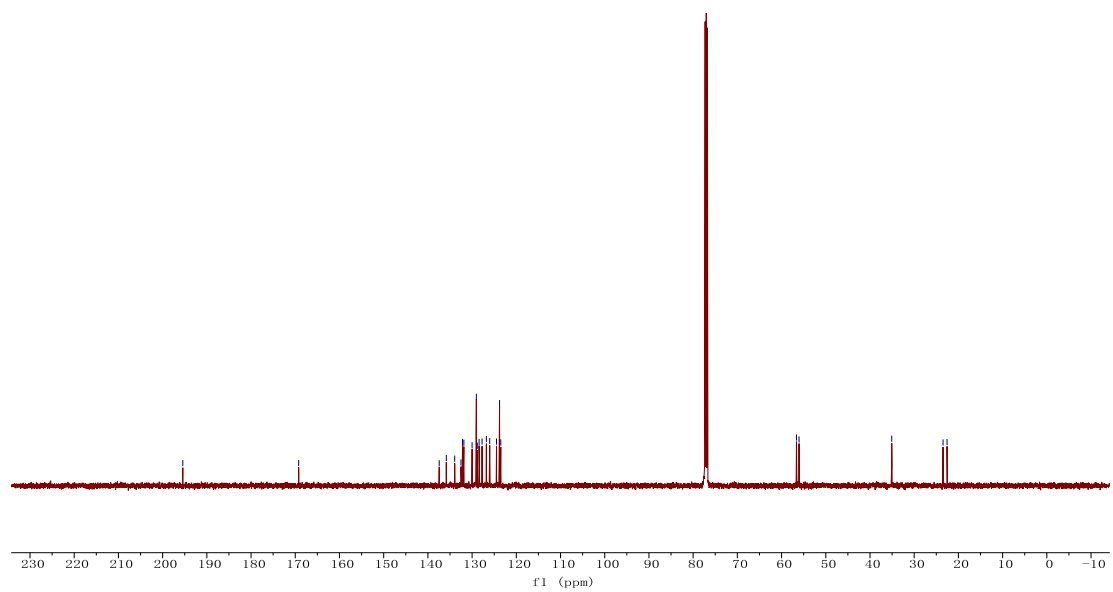

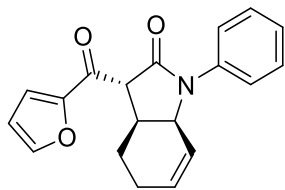

3j

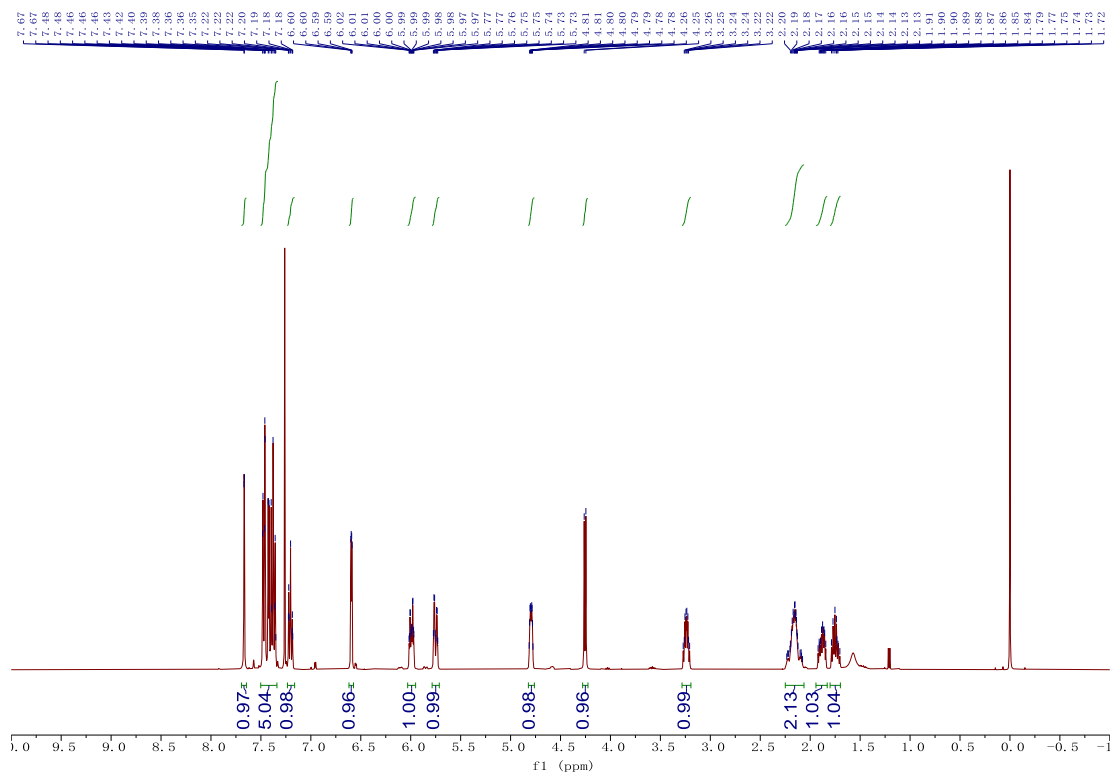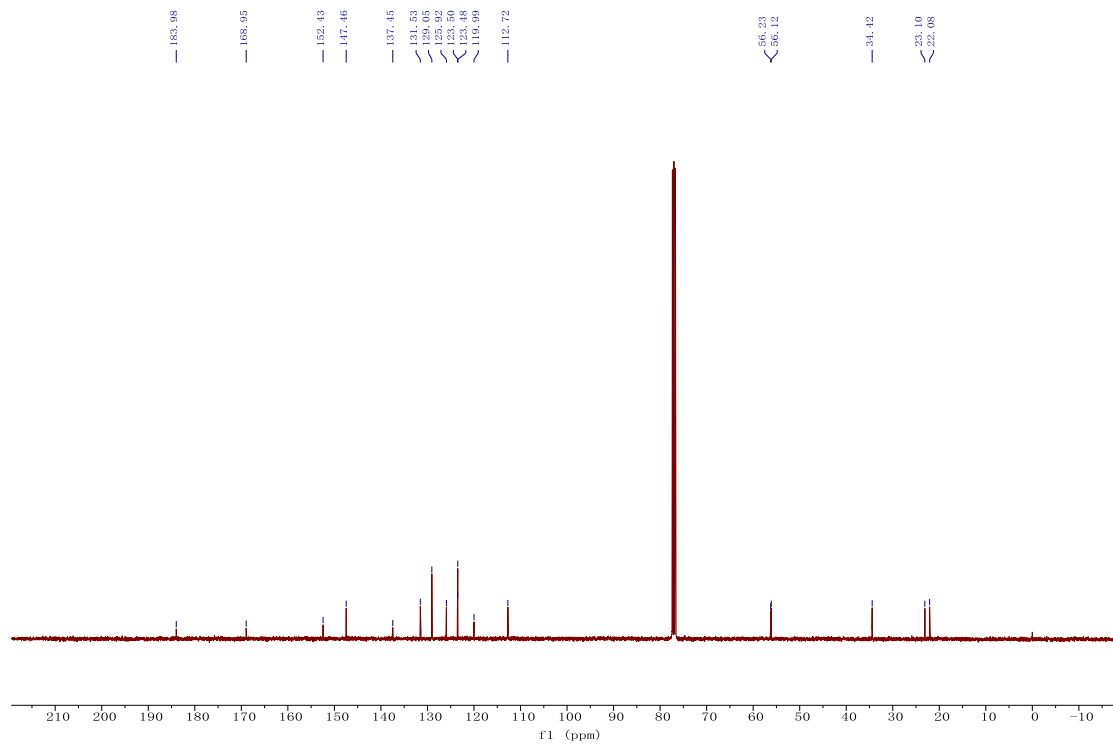

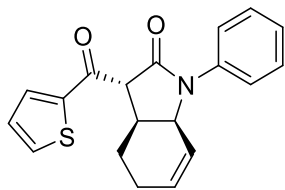

**3k**

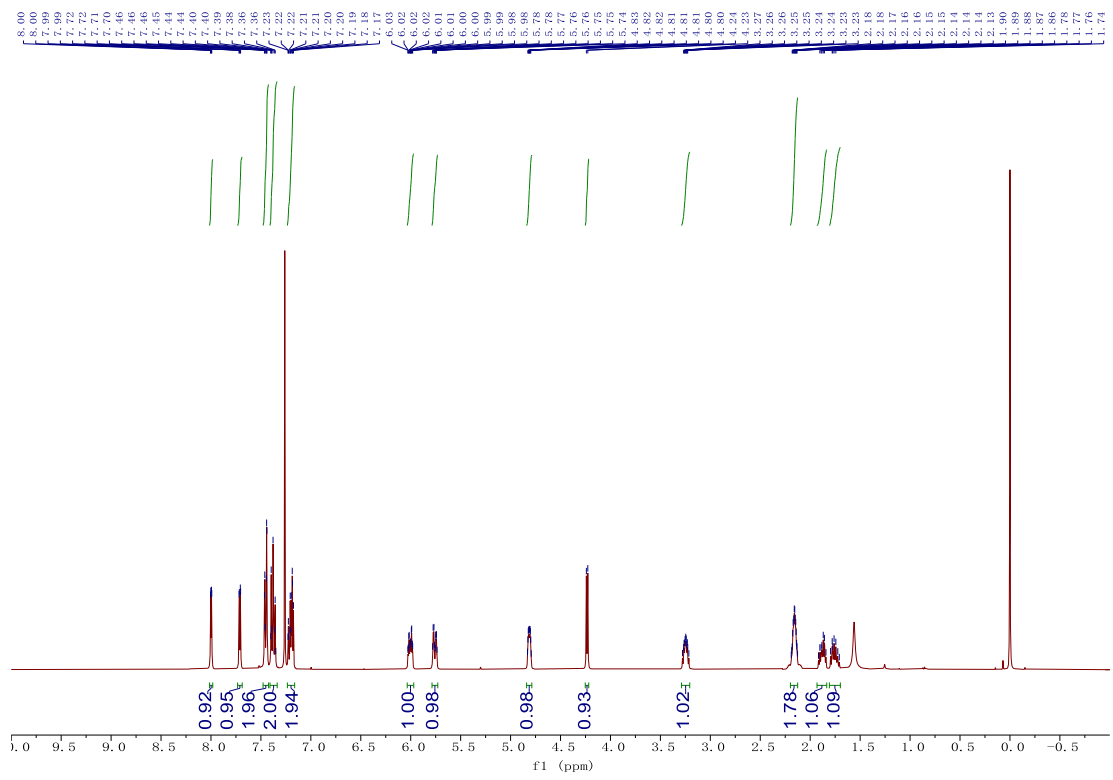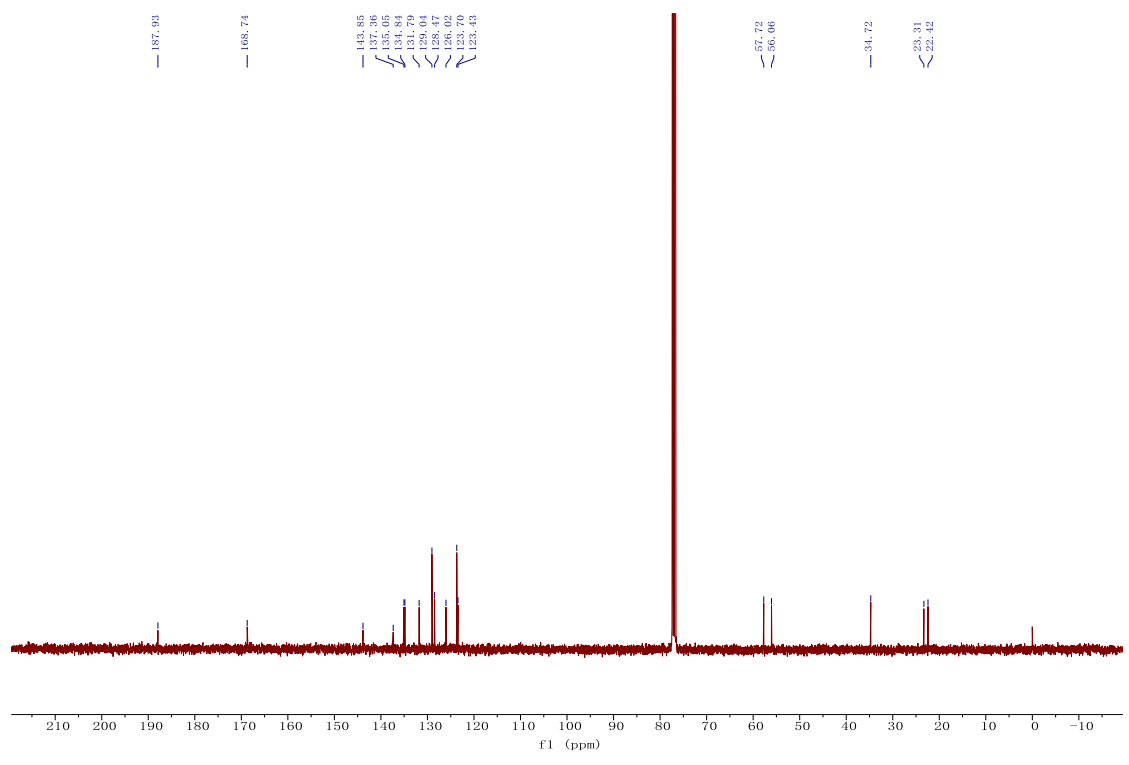

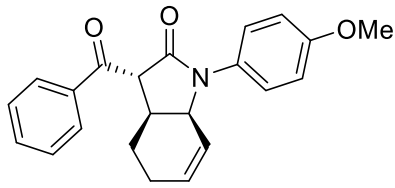

31

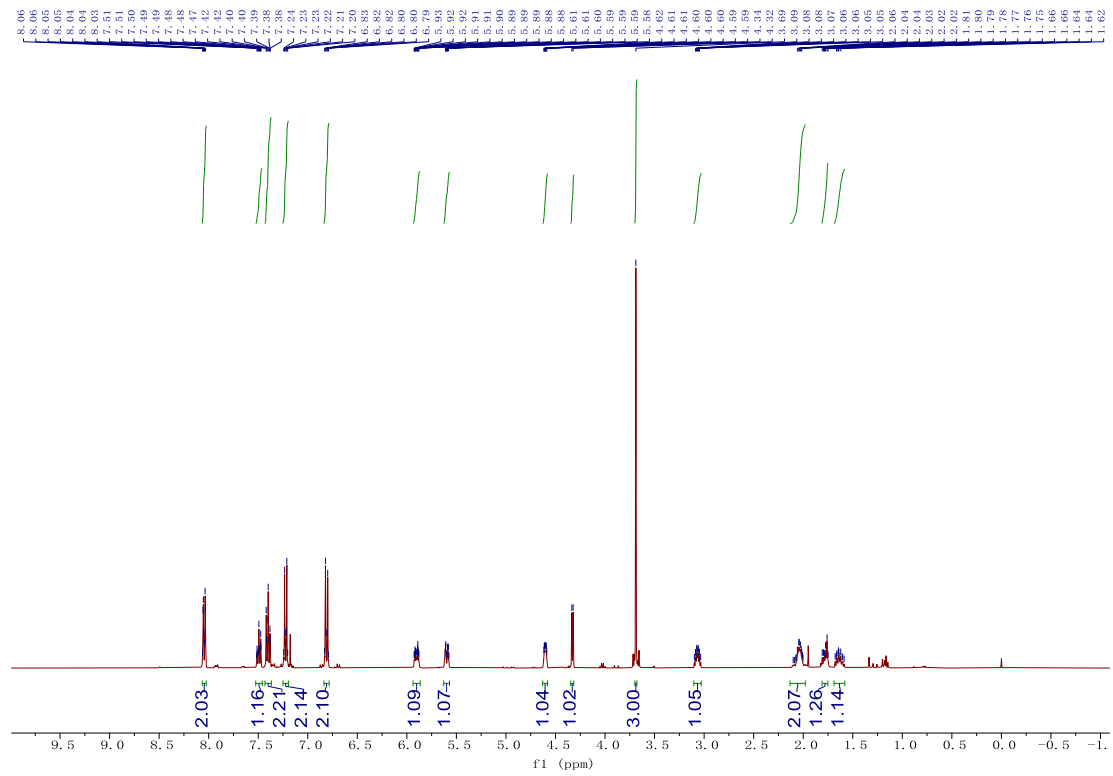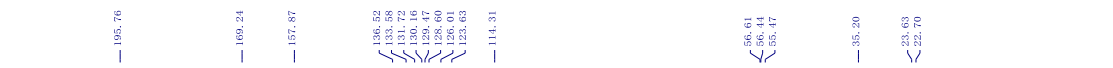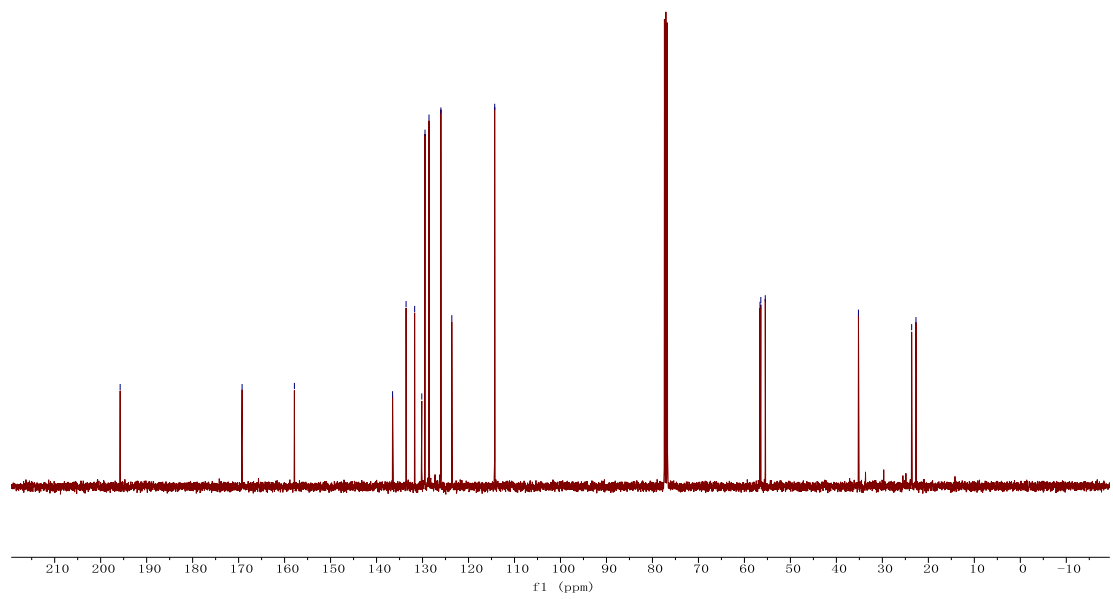



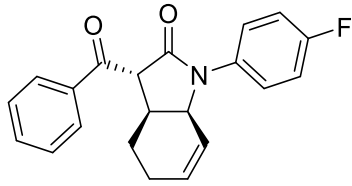

**3n**

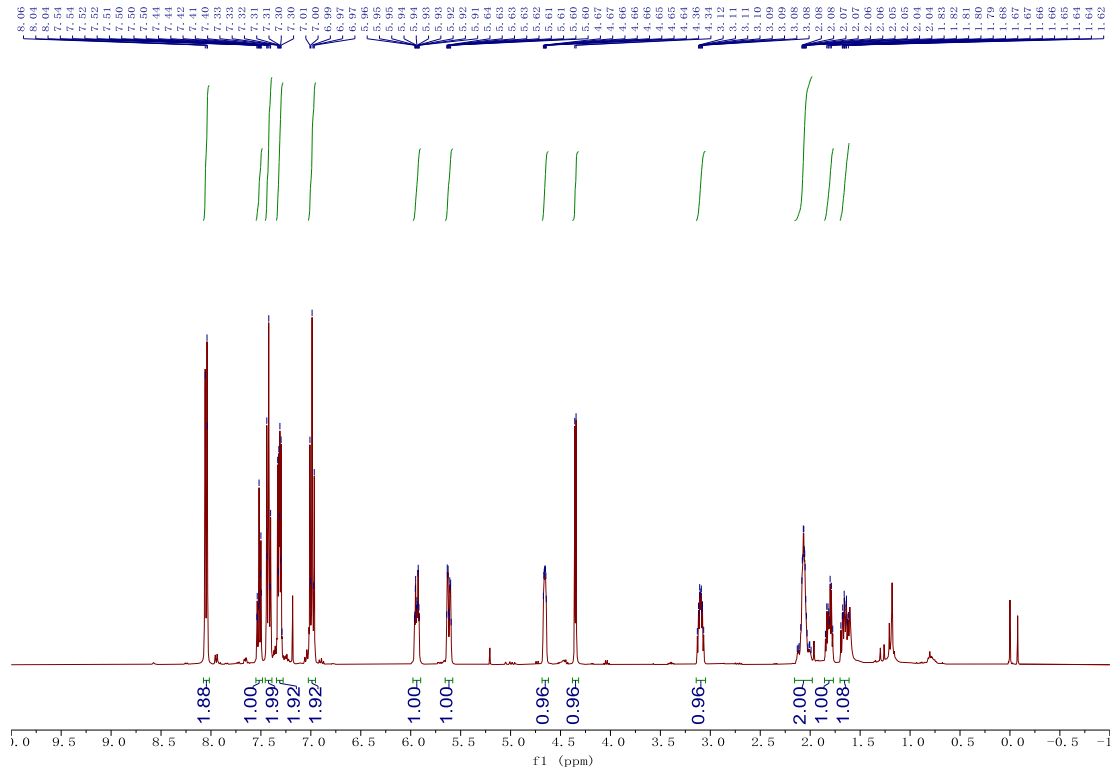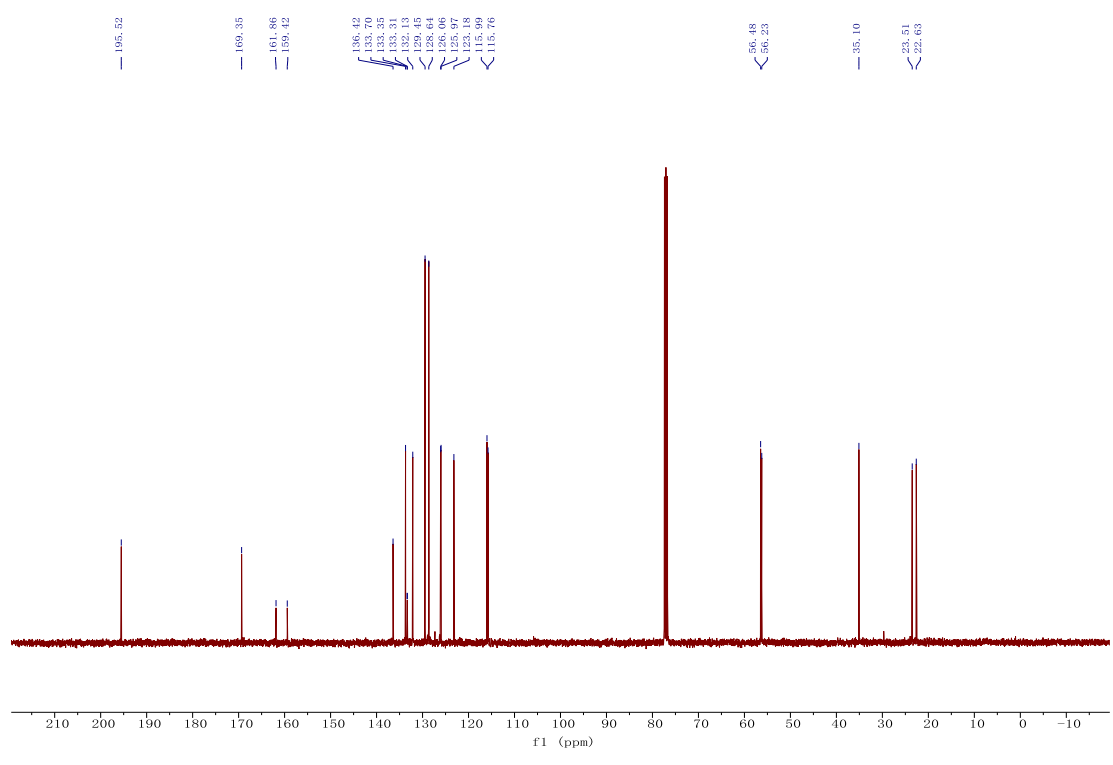

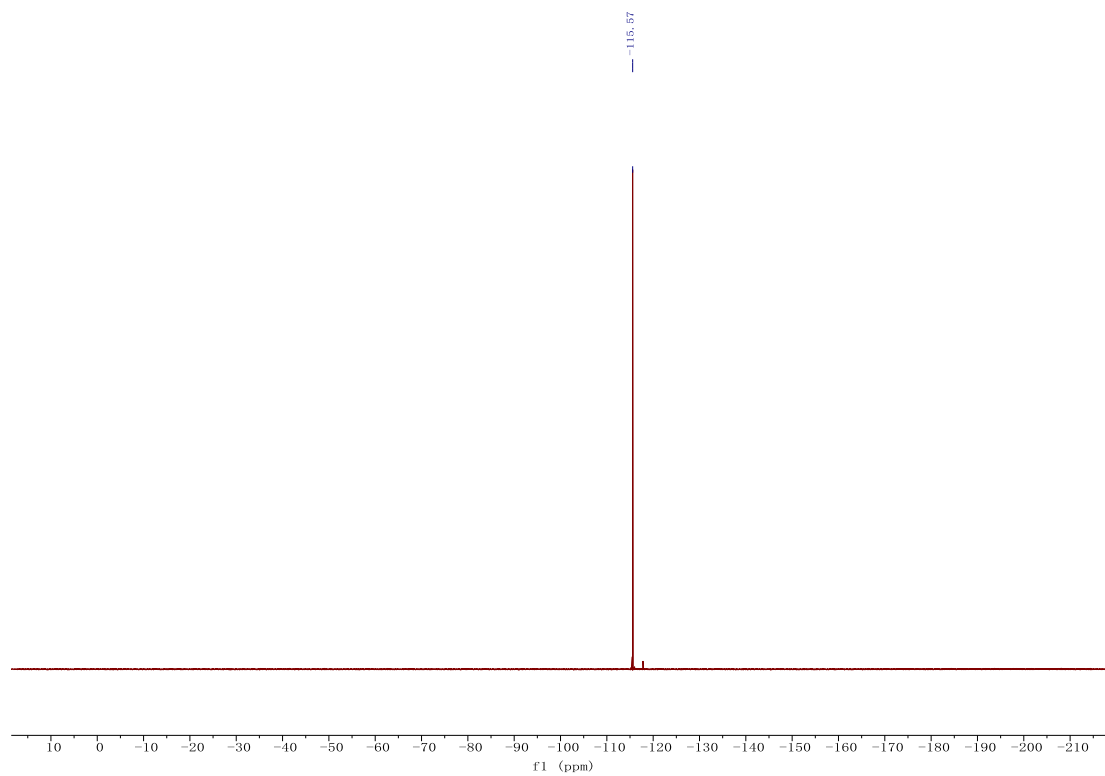





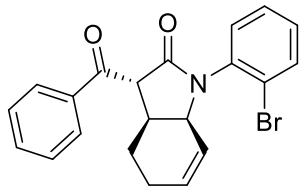

**3p**

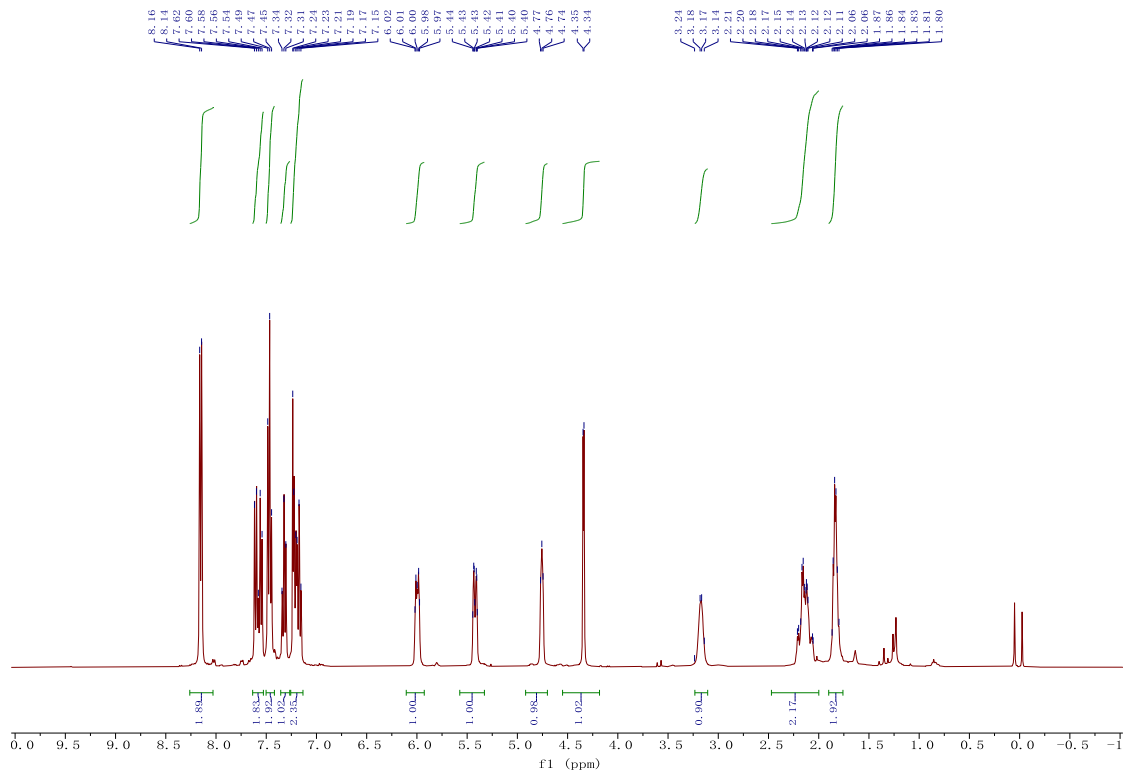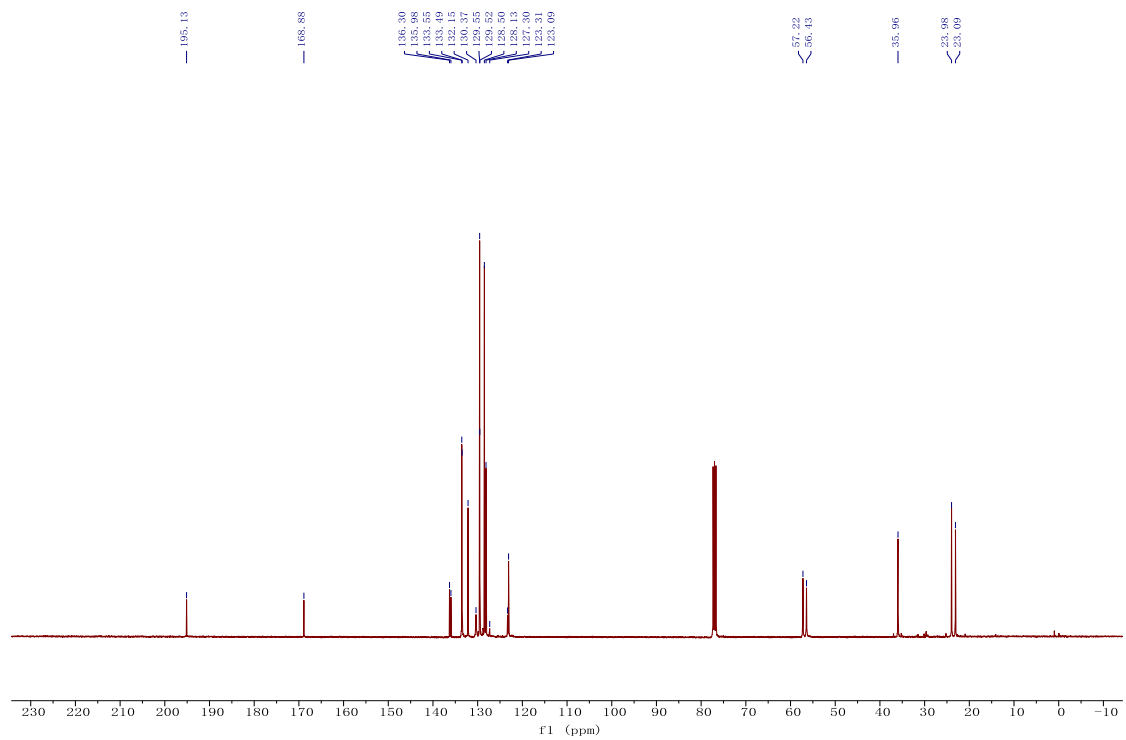



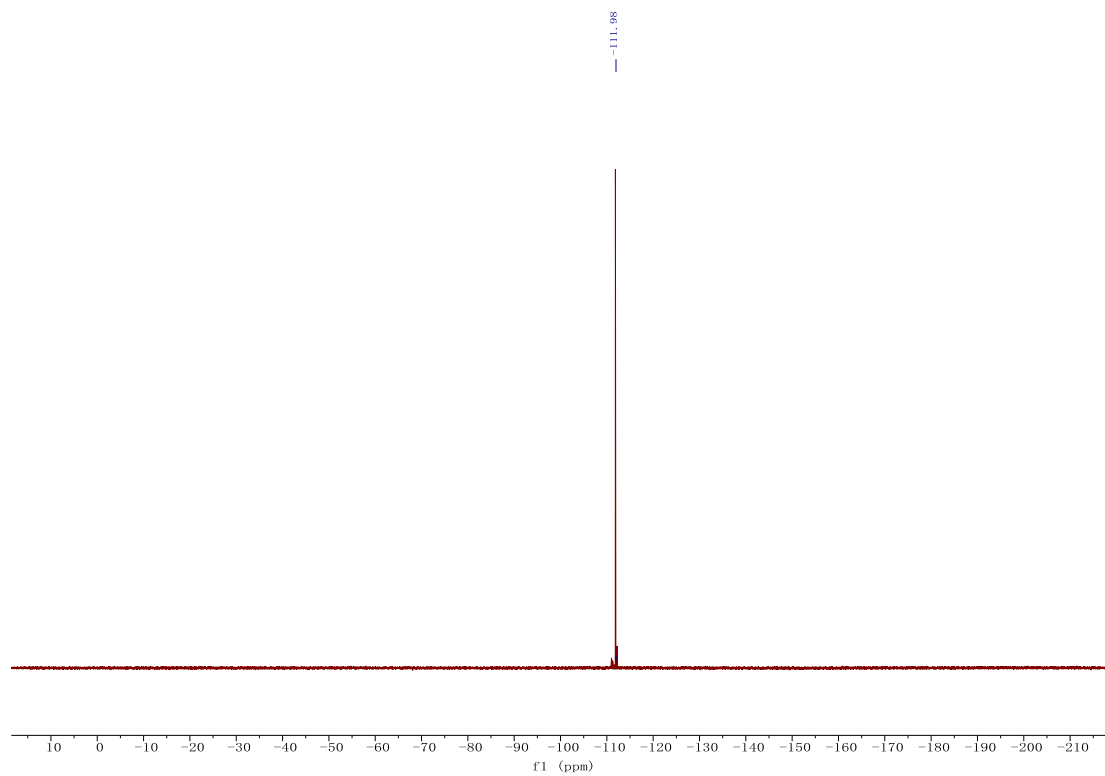

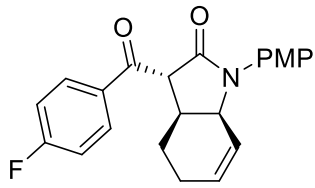

**3r**

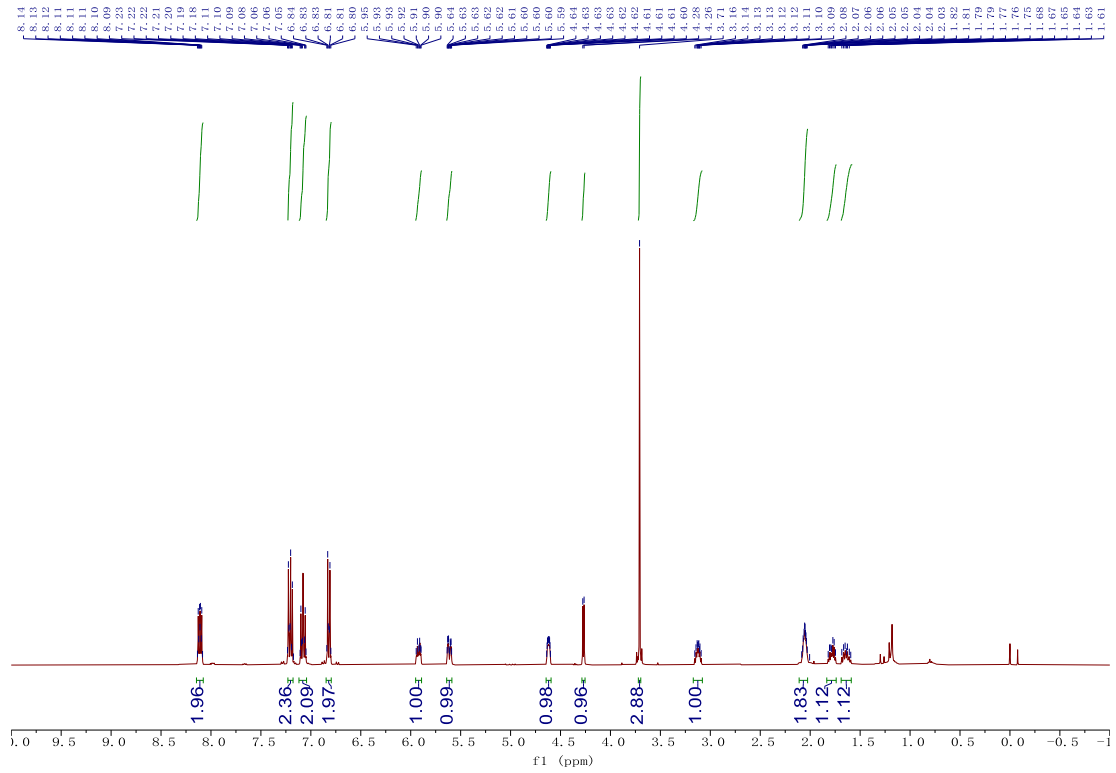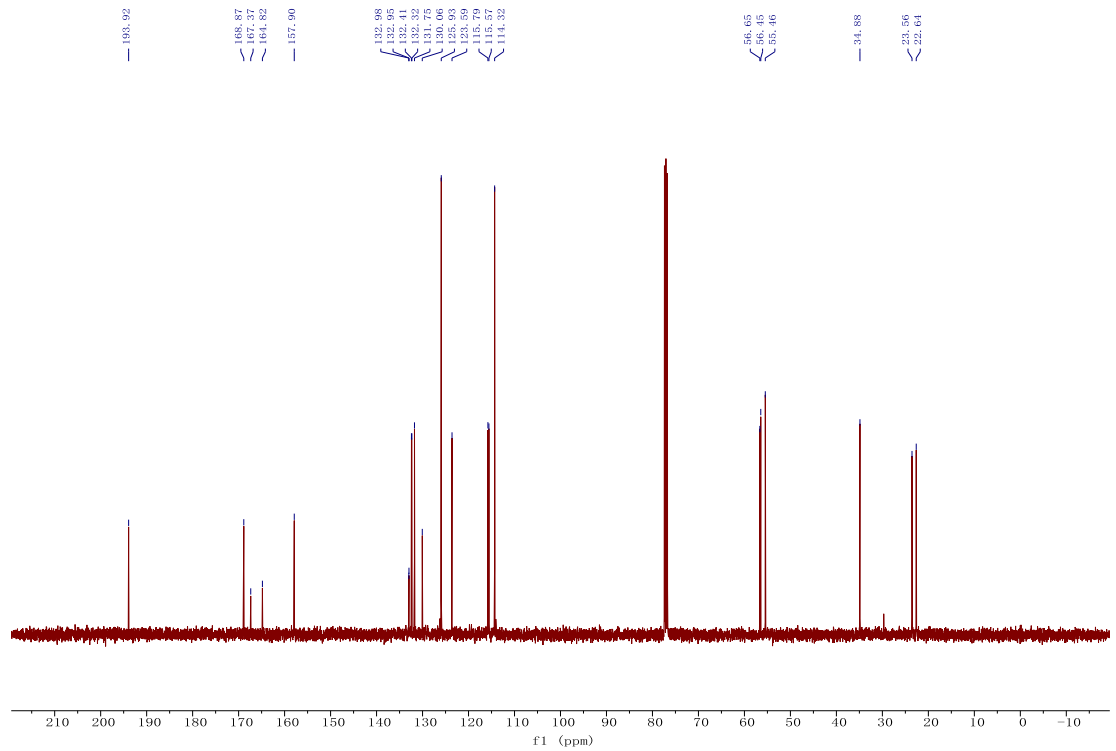

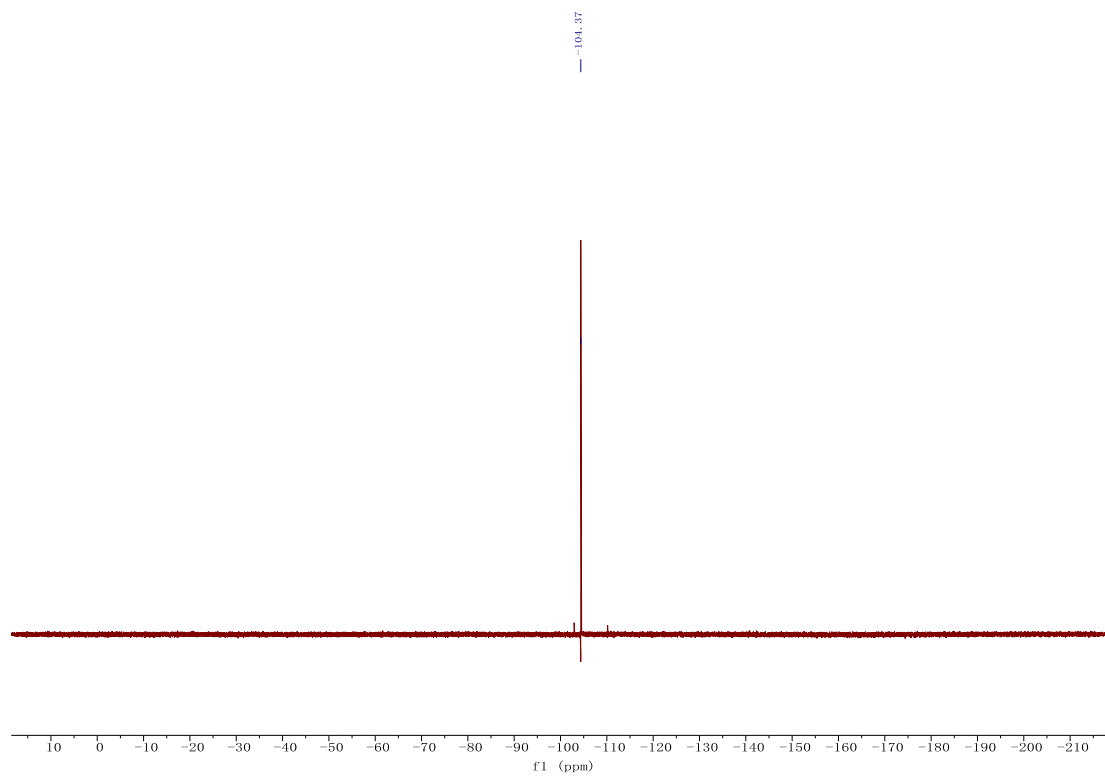

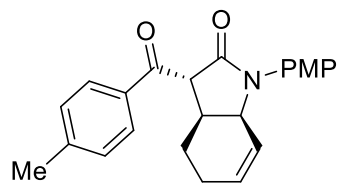

**3s**

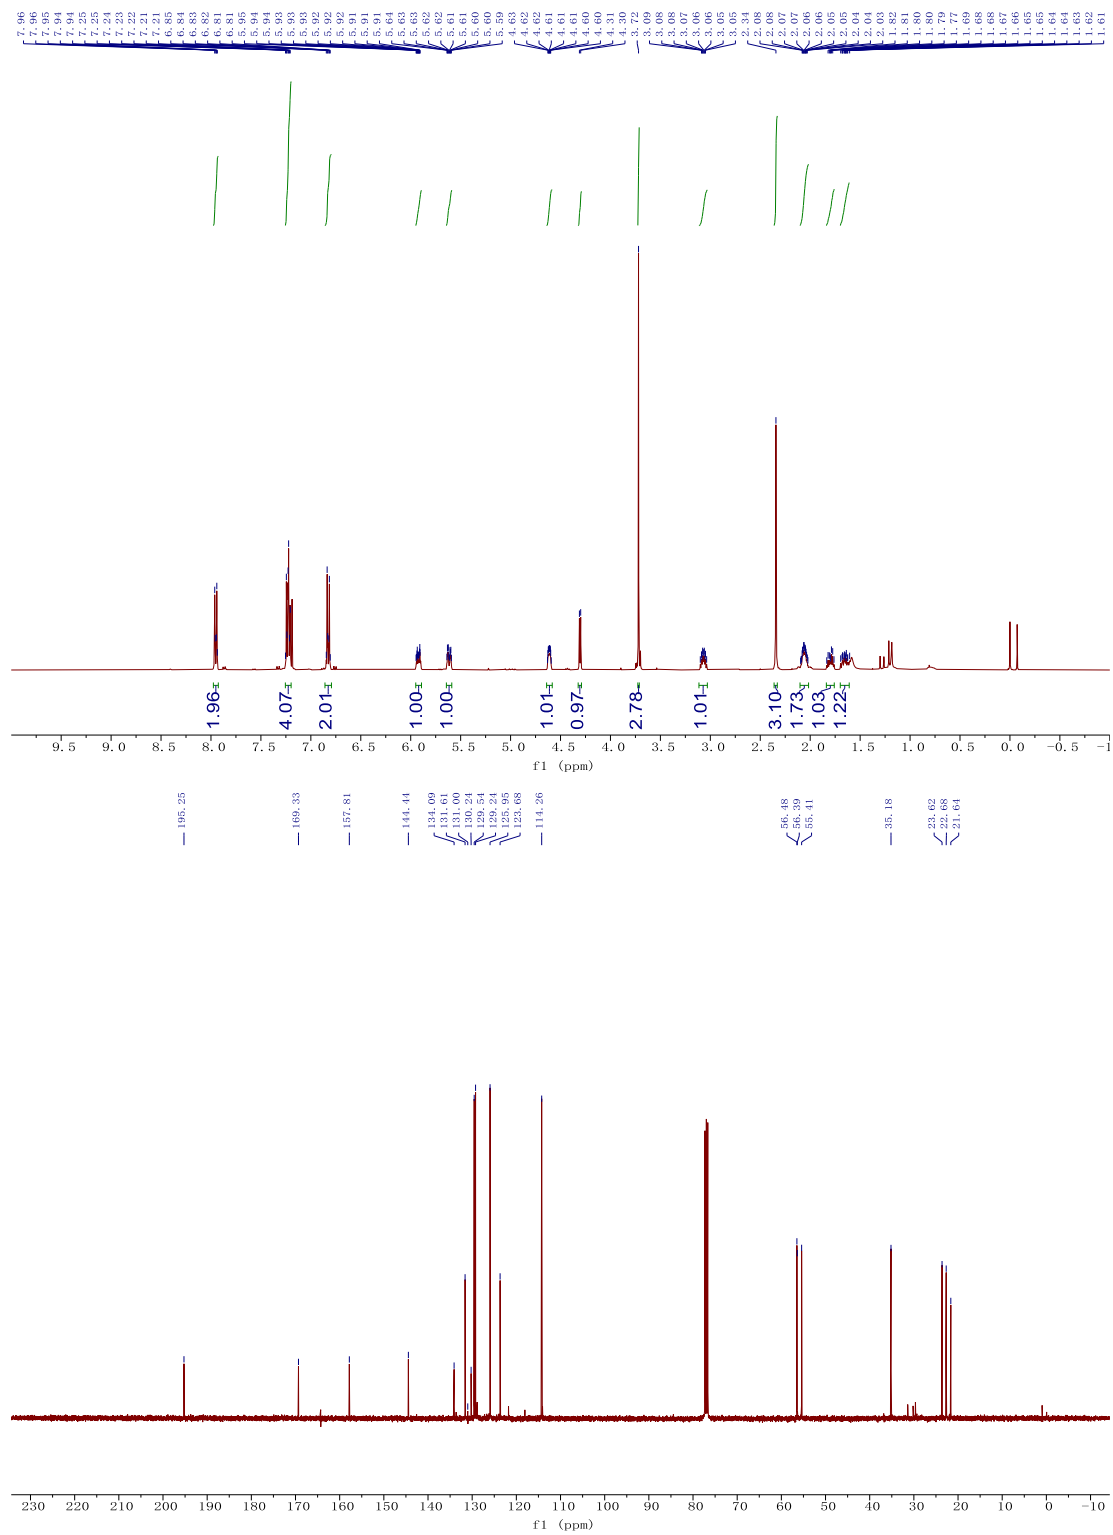

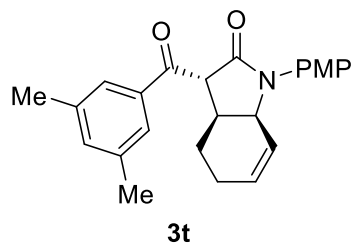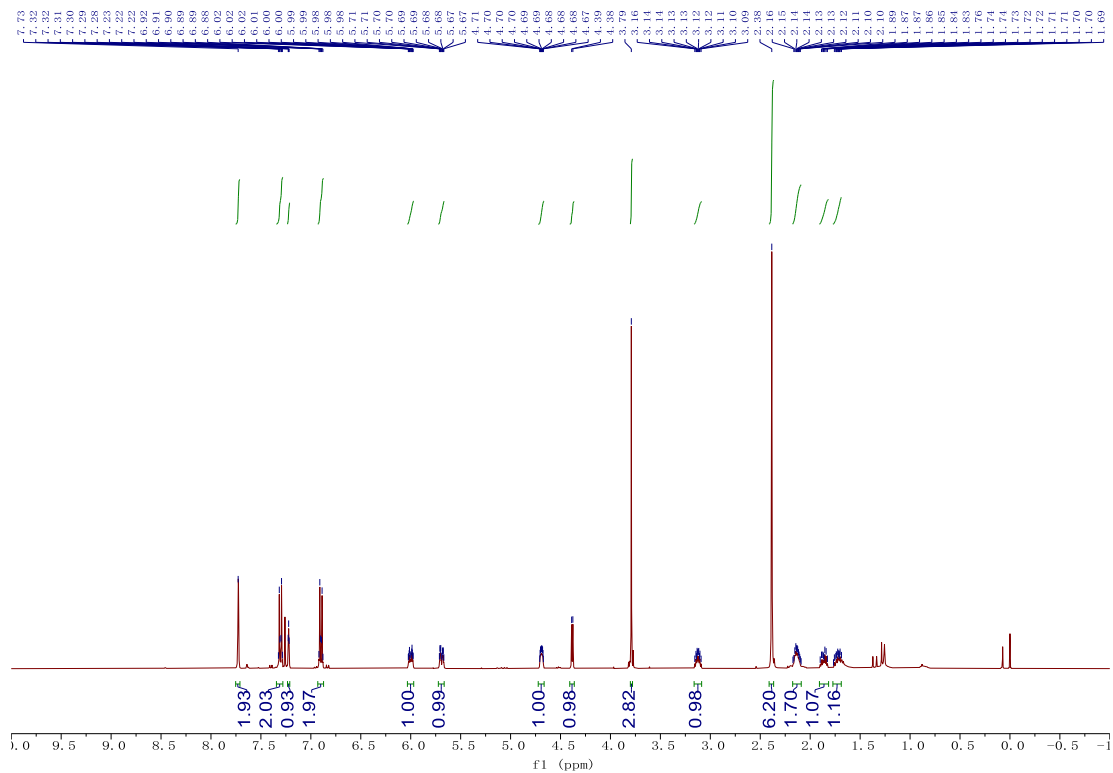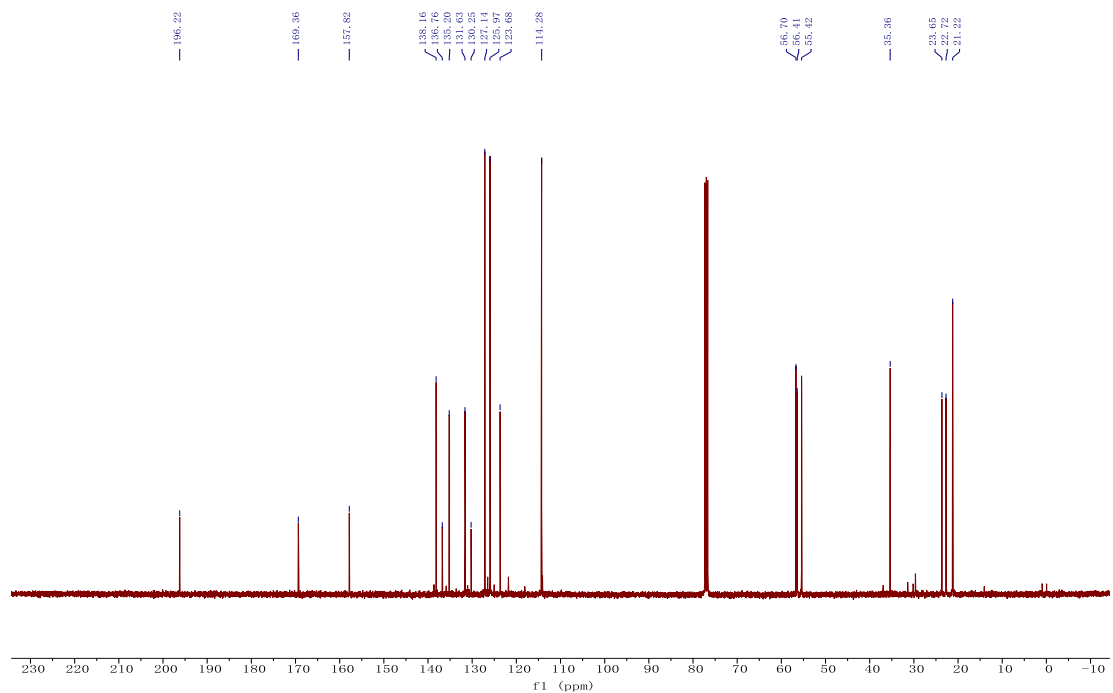

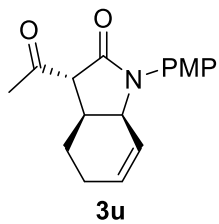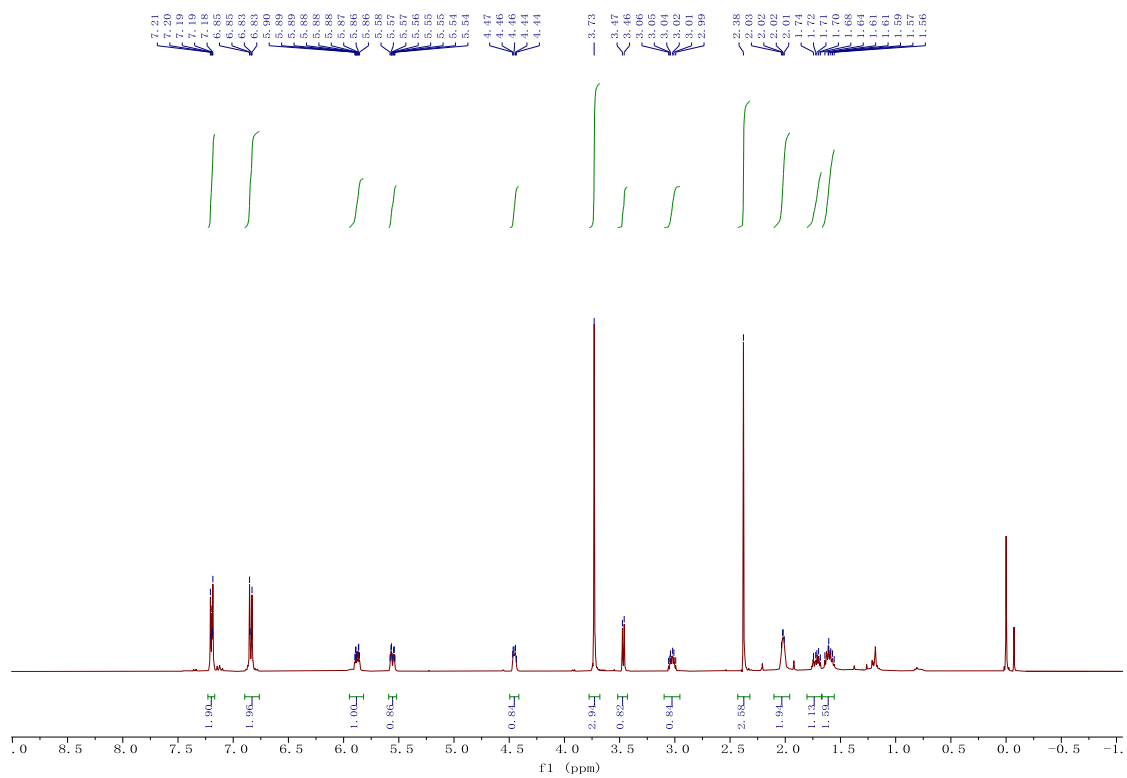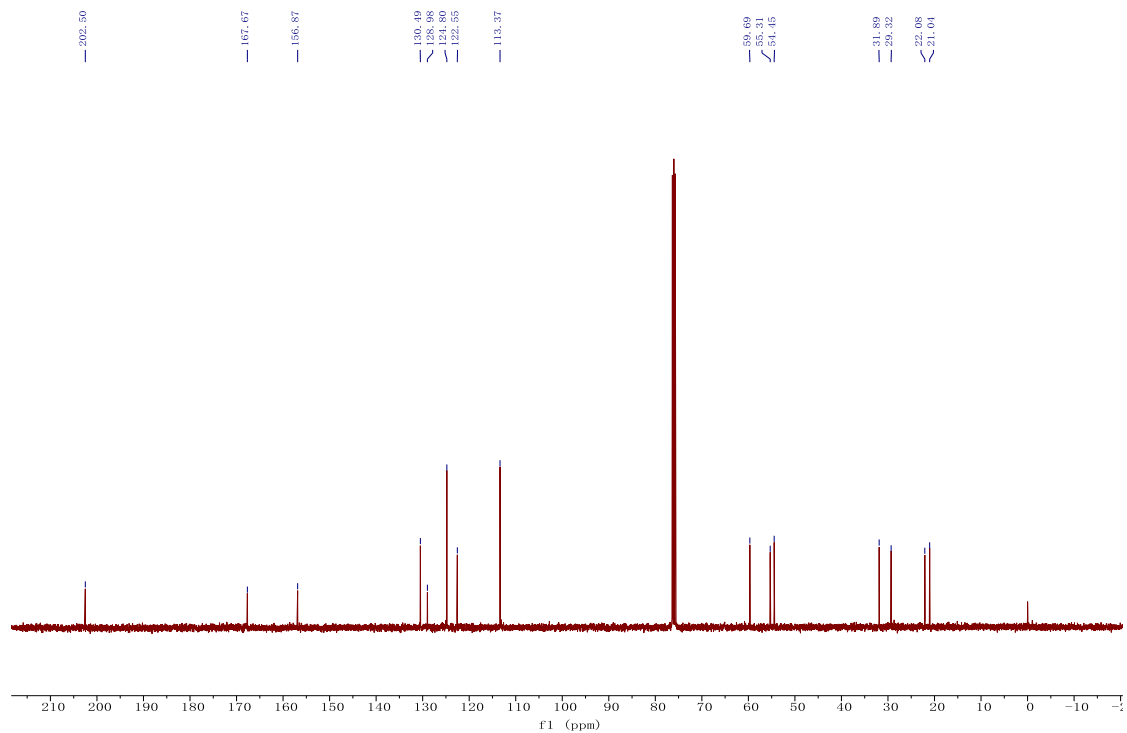



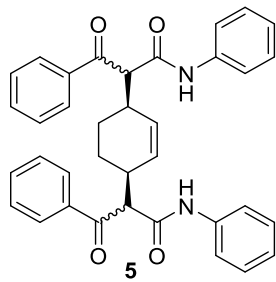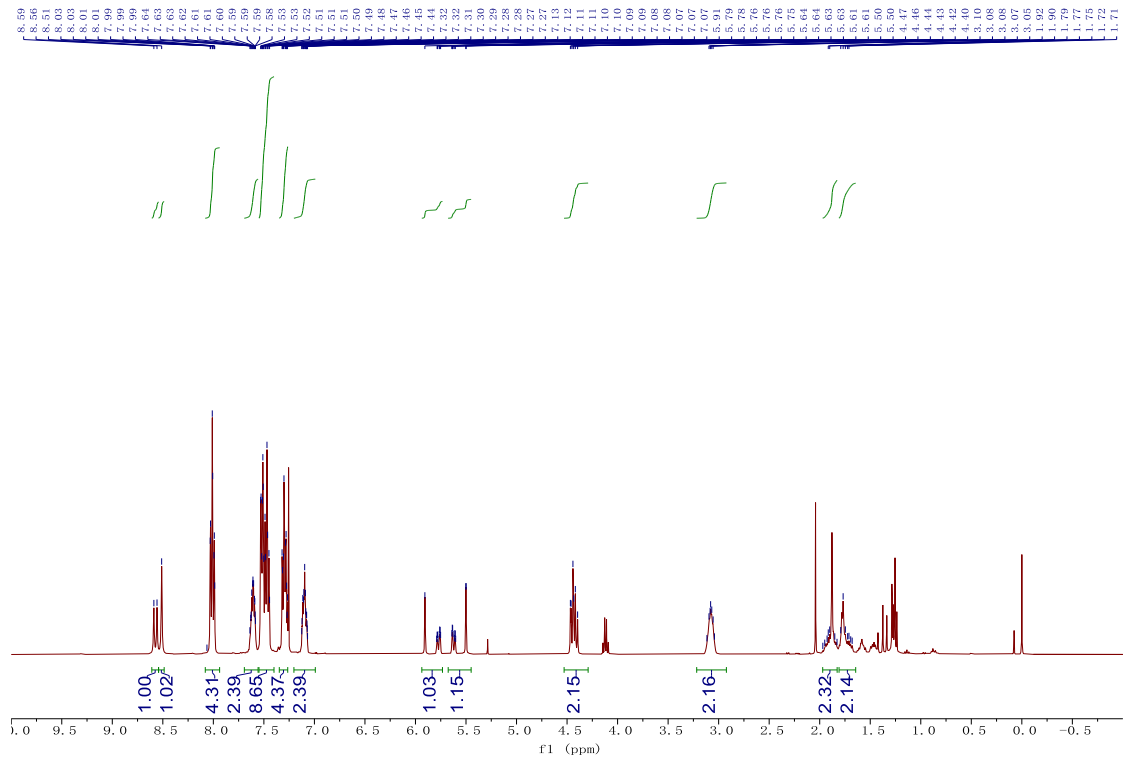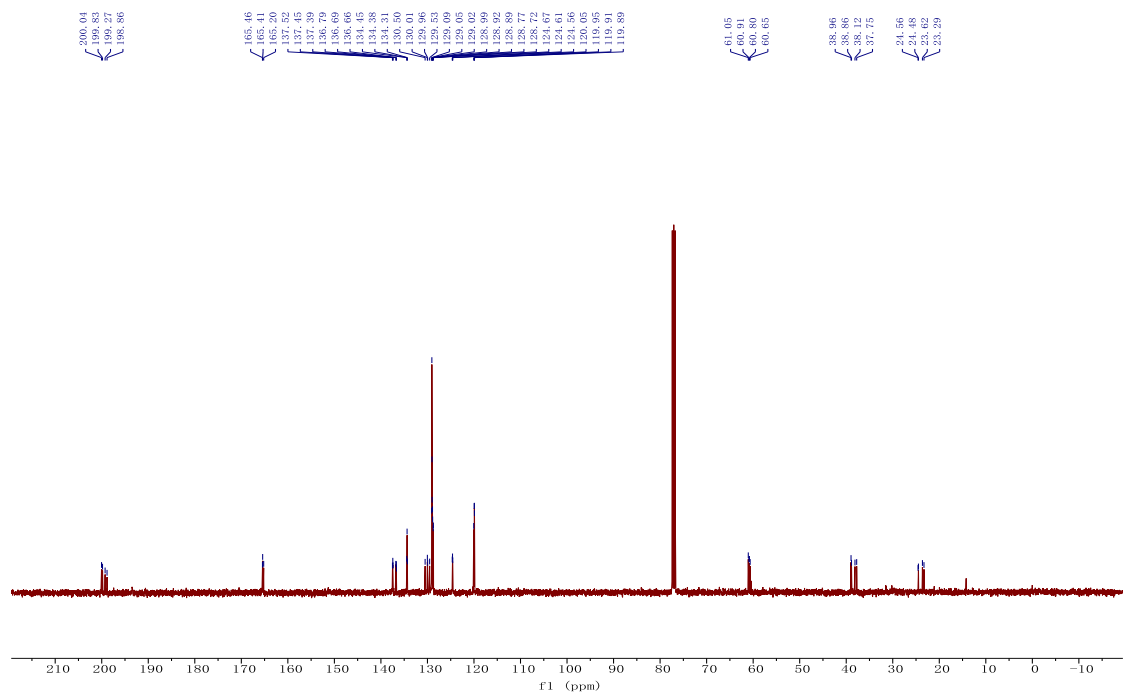

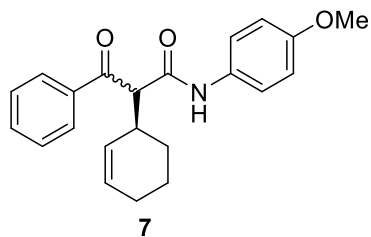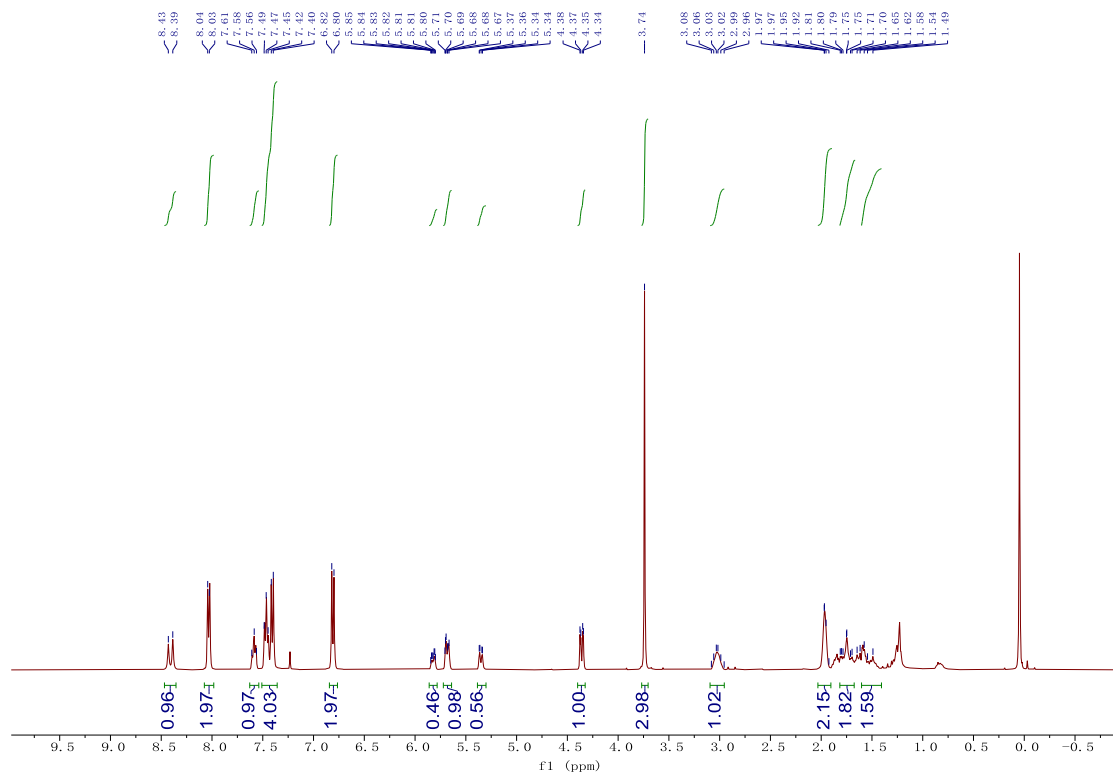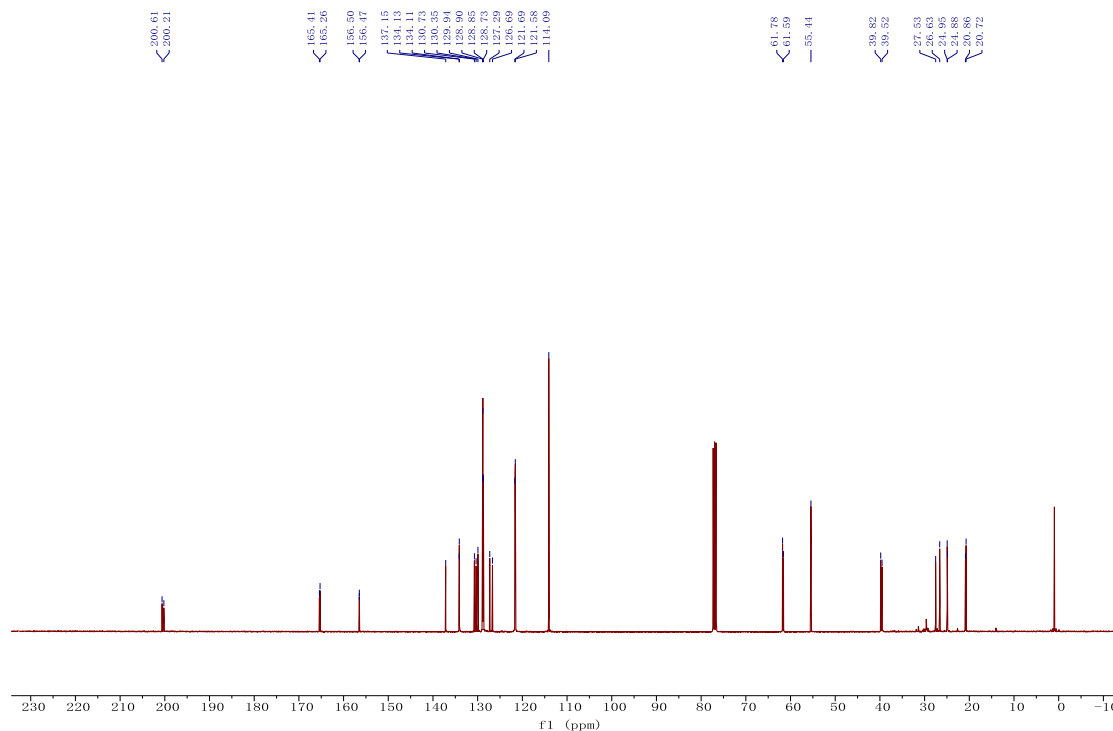

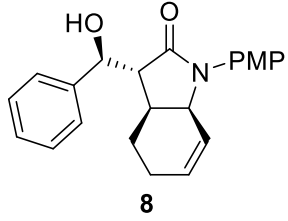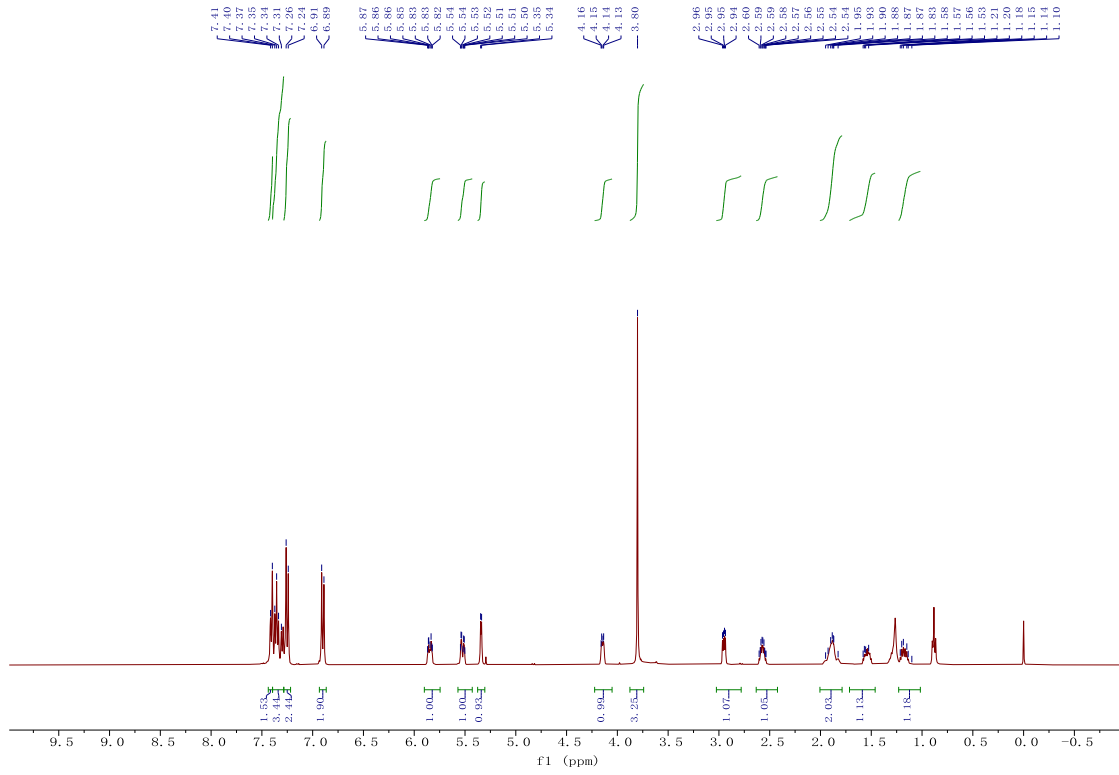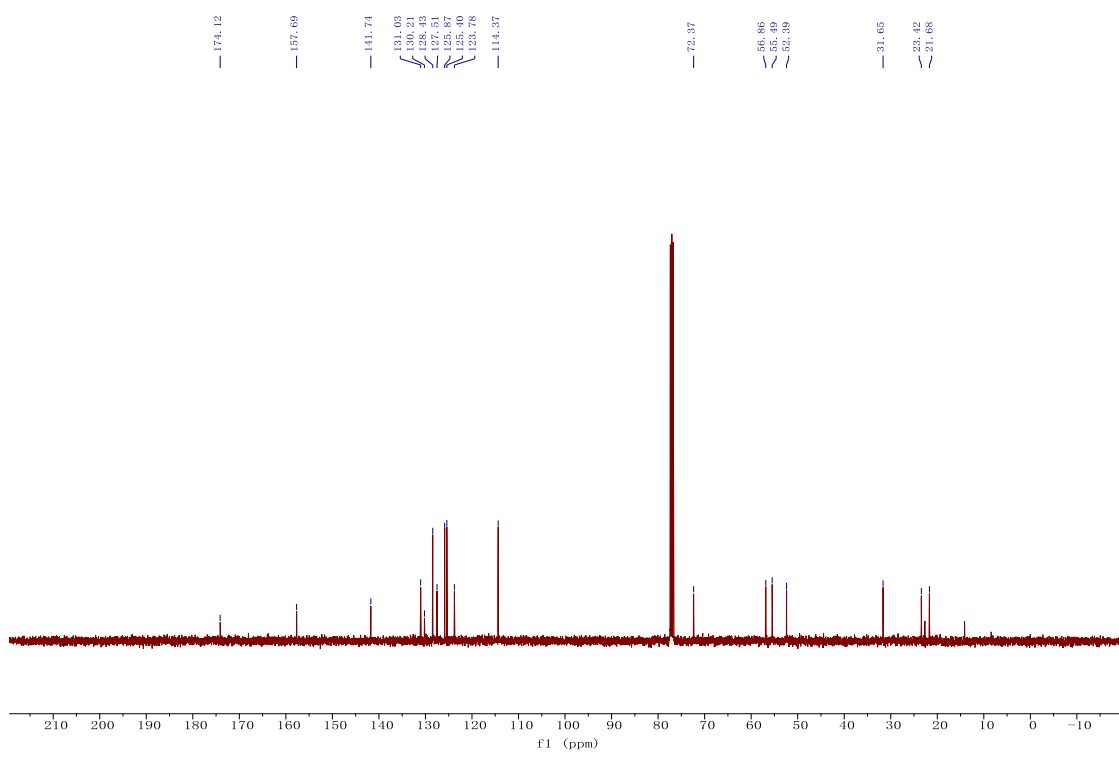

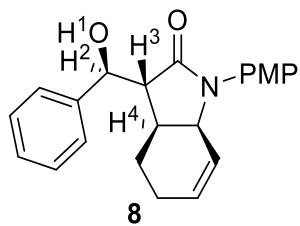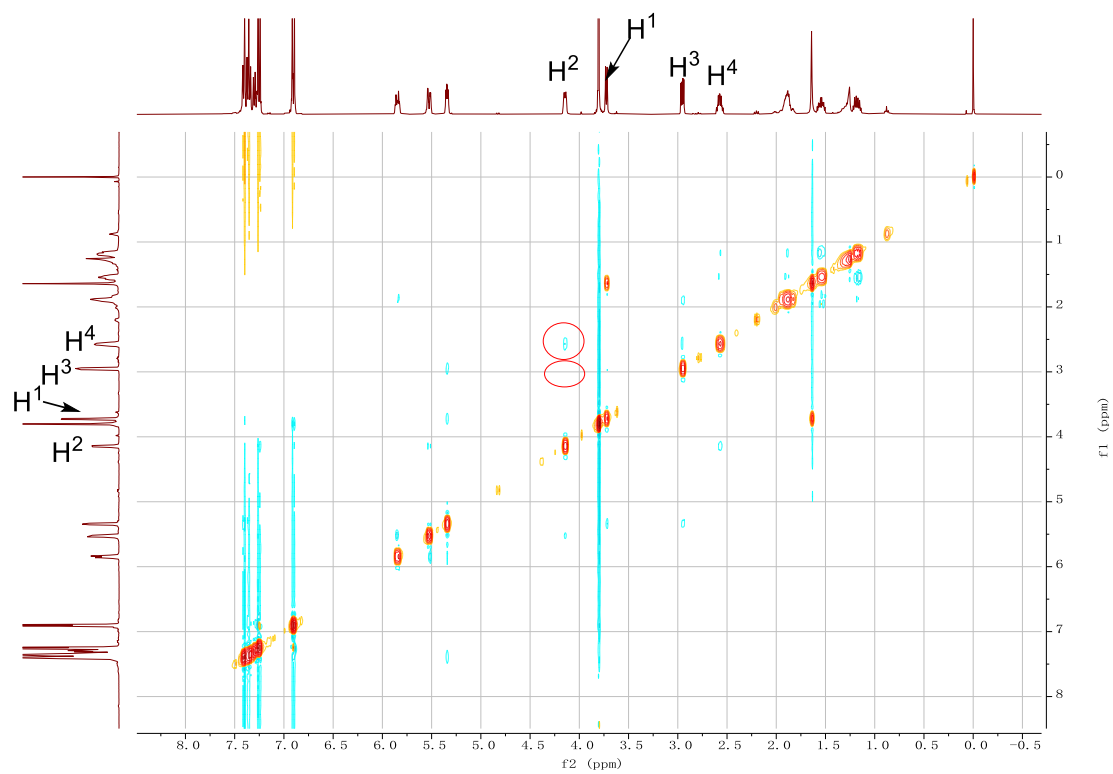

From the NOESY spectrum of **8**, the H<sup>2</sup> atom shows NOE interactions relative to the H atoms of H<sup>4</sup>, but no interactions relative to H<sup>3</sup> atom, which indicates the H<sup>2</sup> and H<sup>4</sup> group are *cis*-configuration.

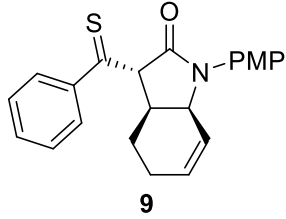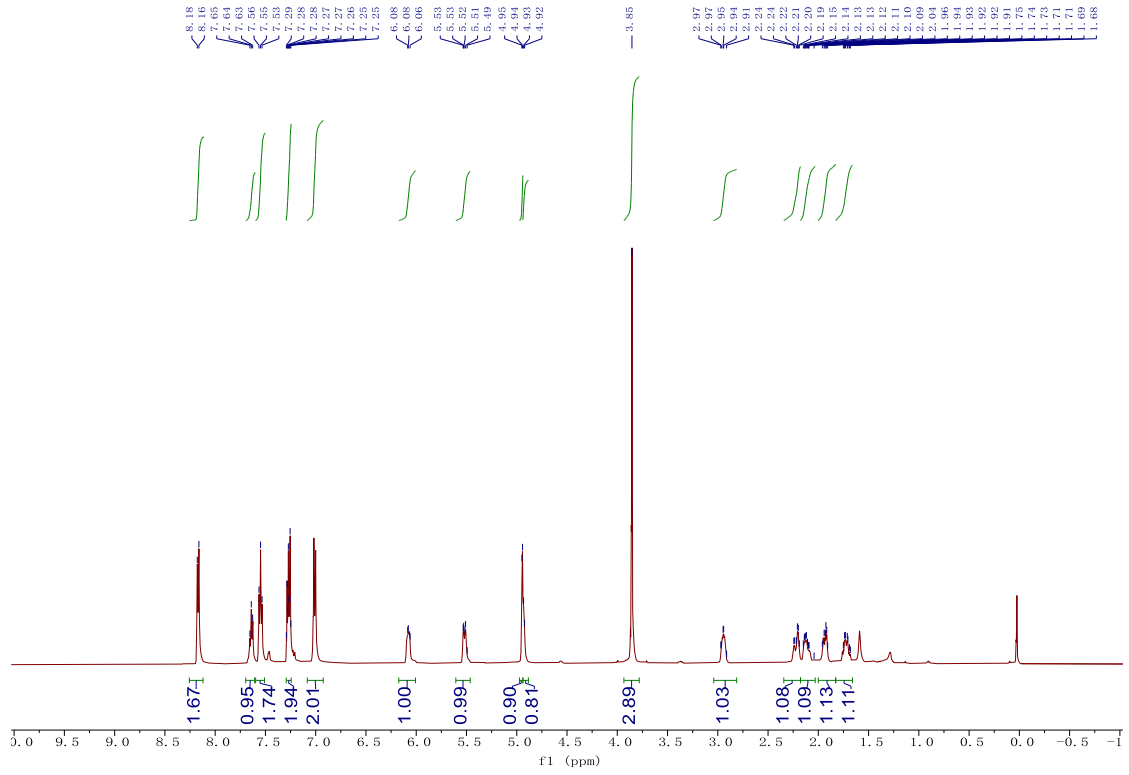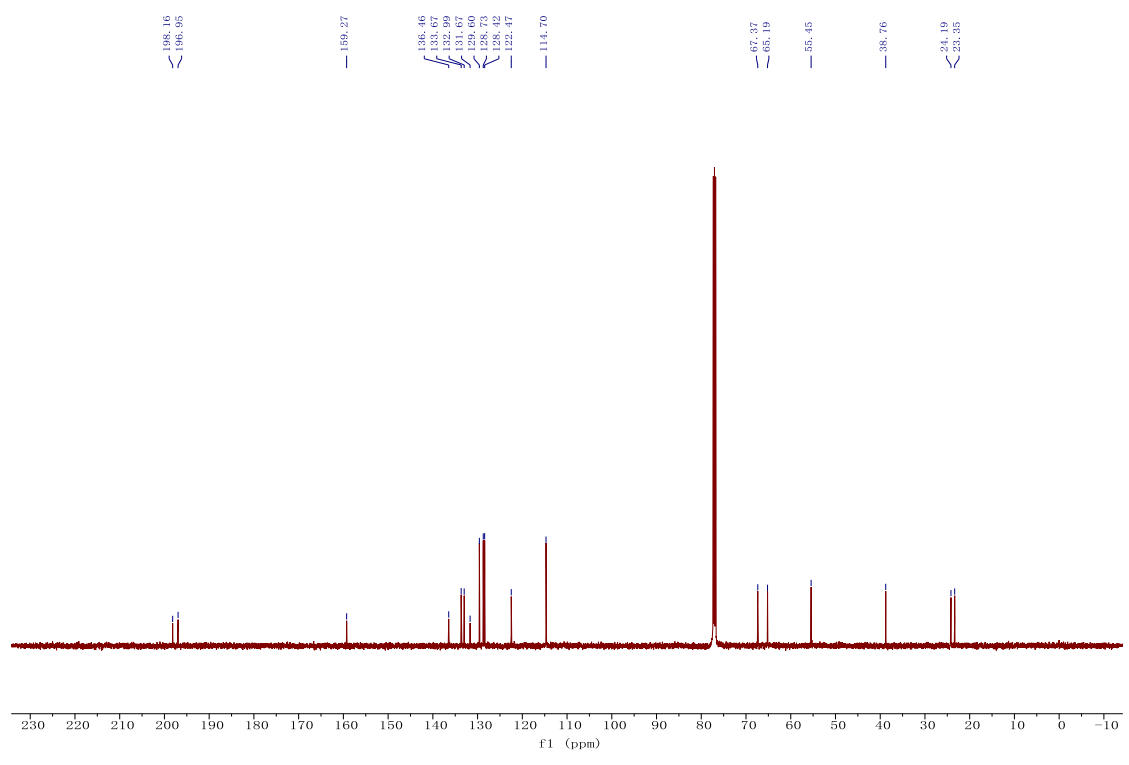

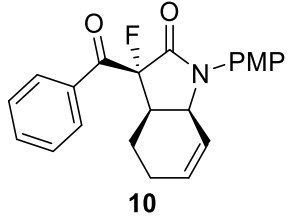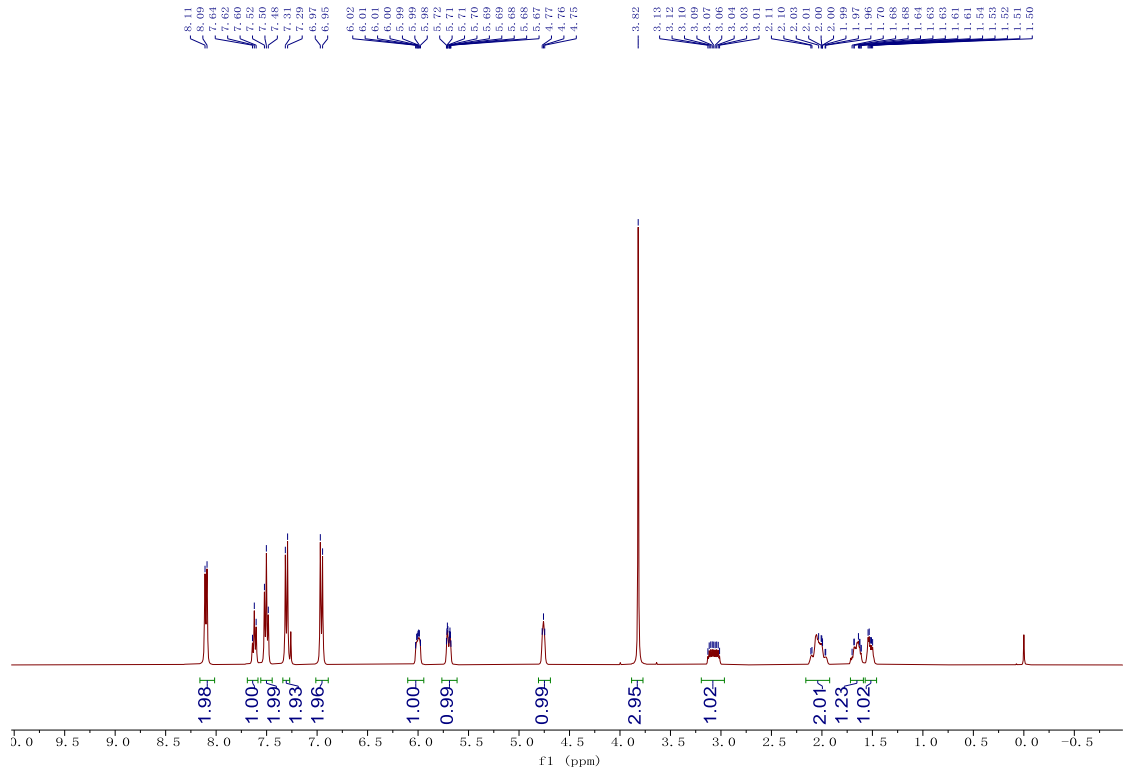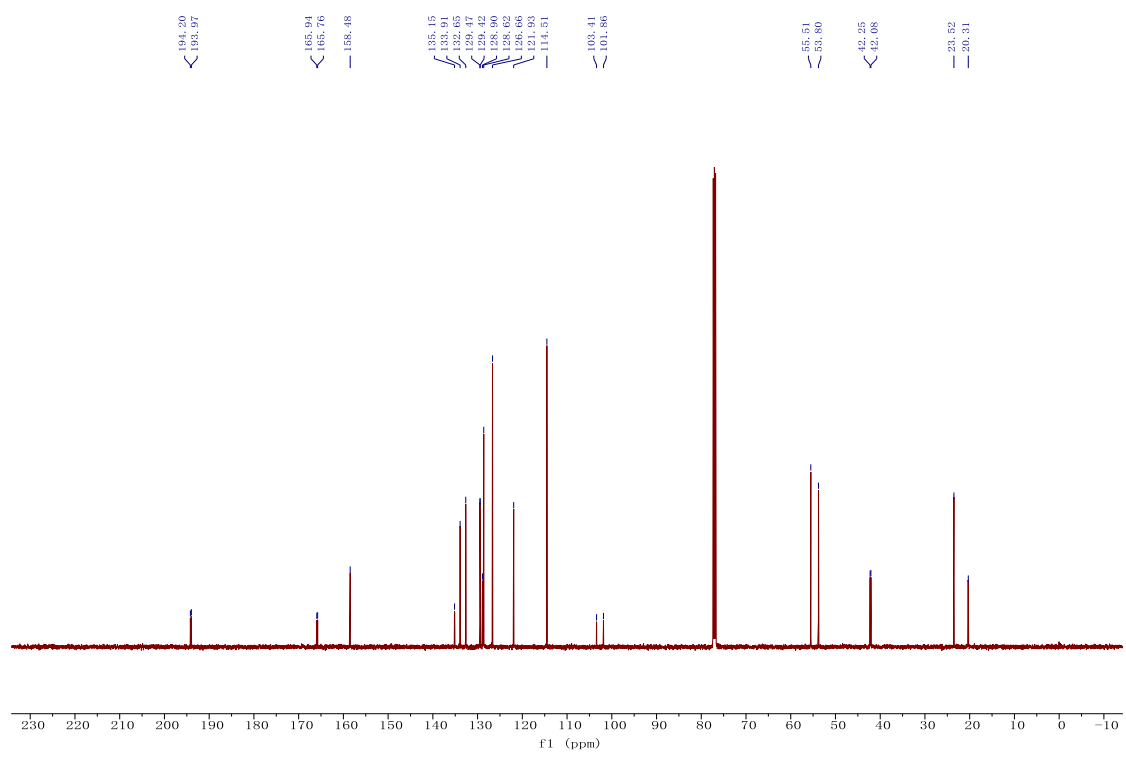

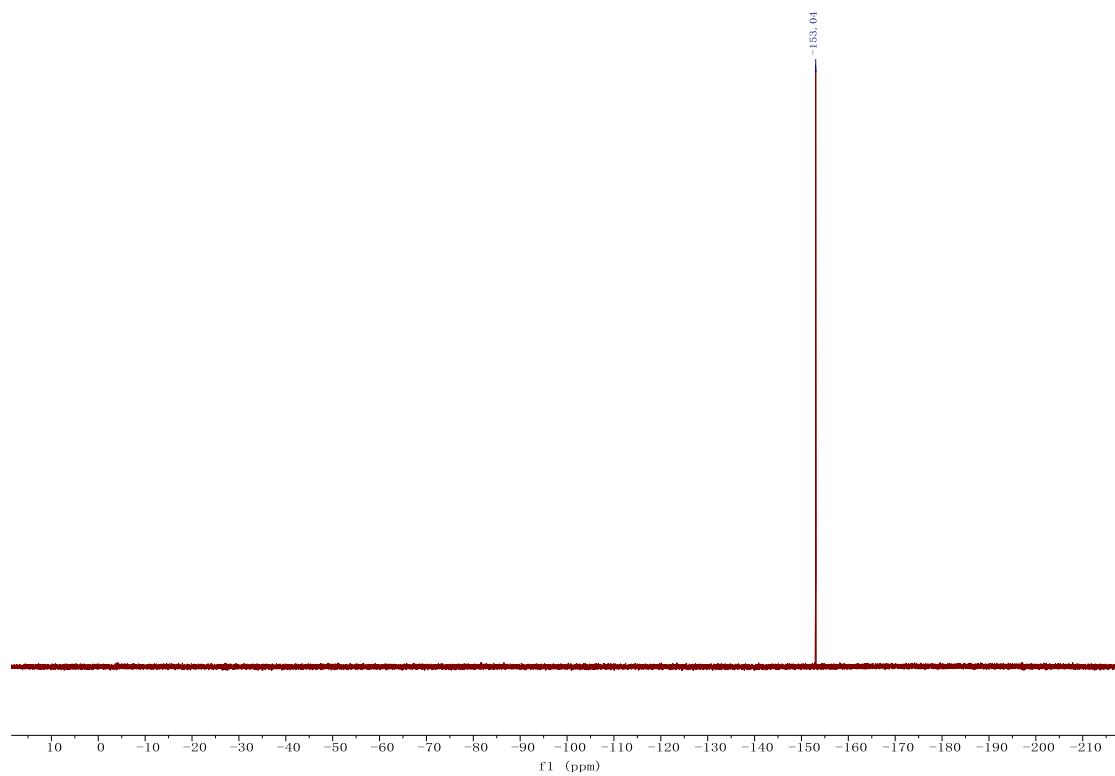







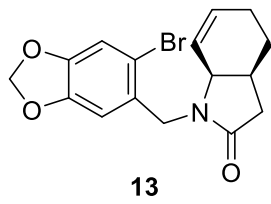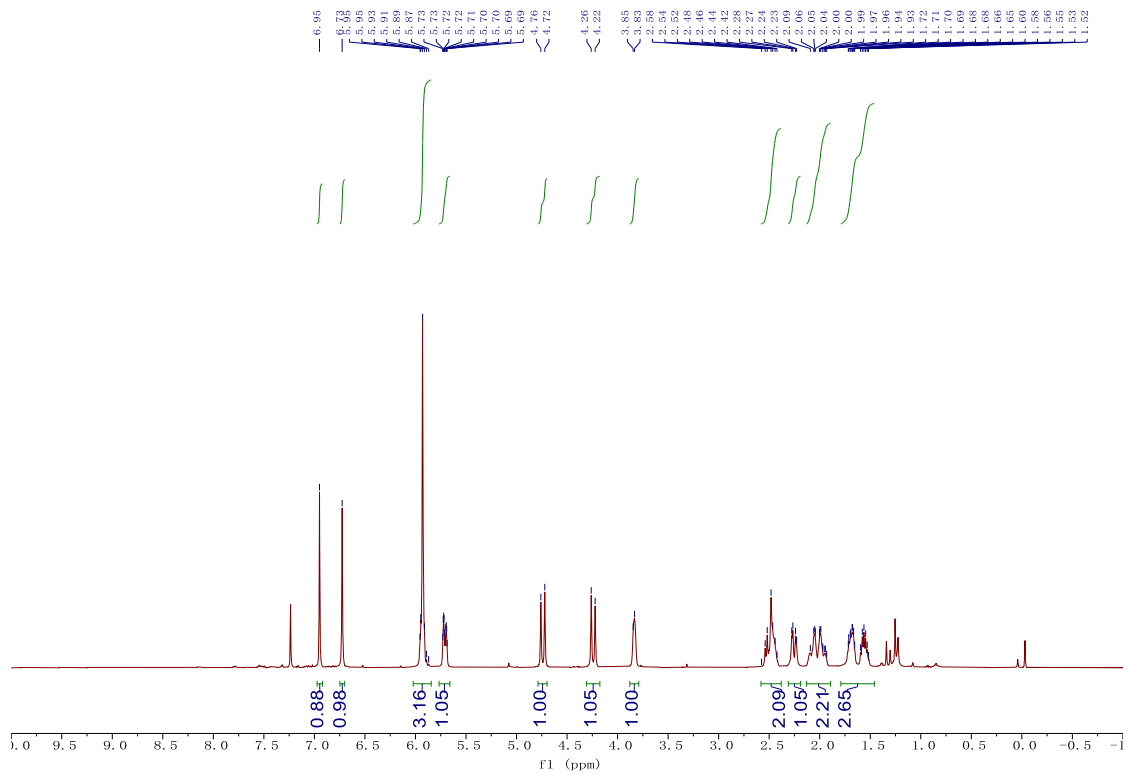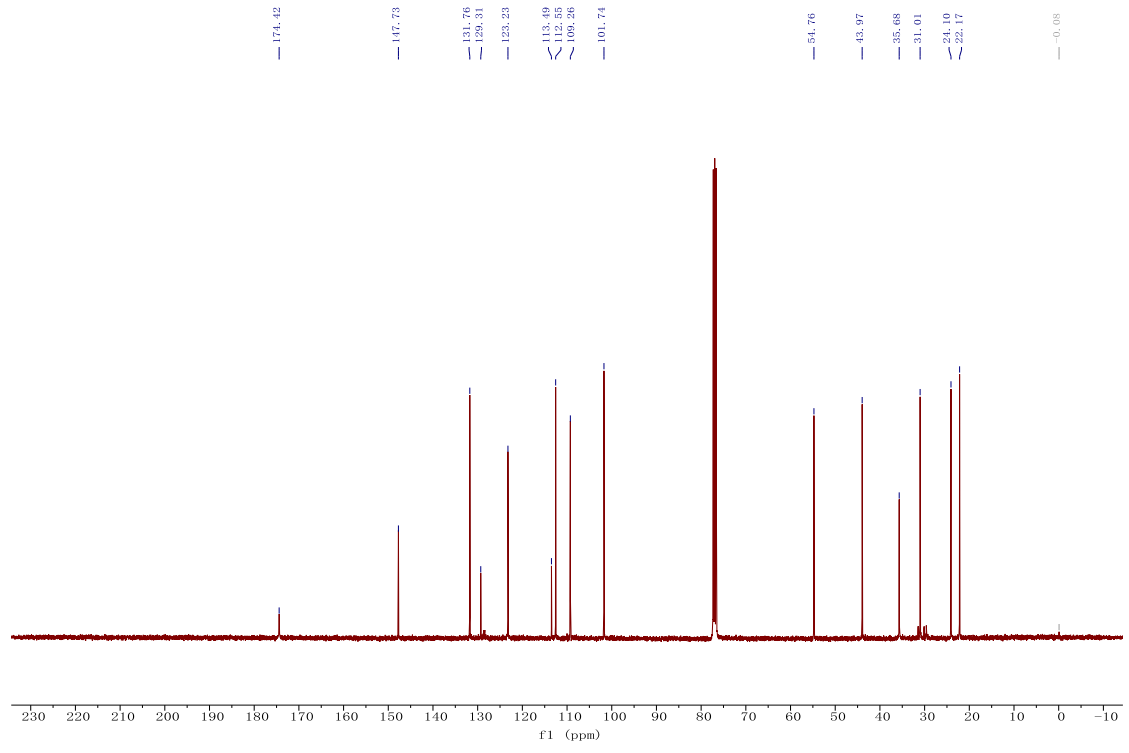

## 7. HPLC Data

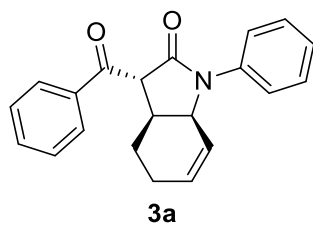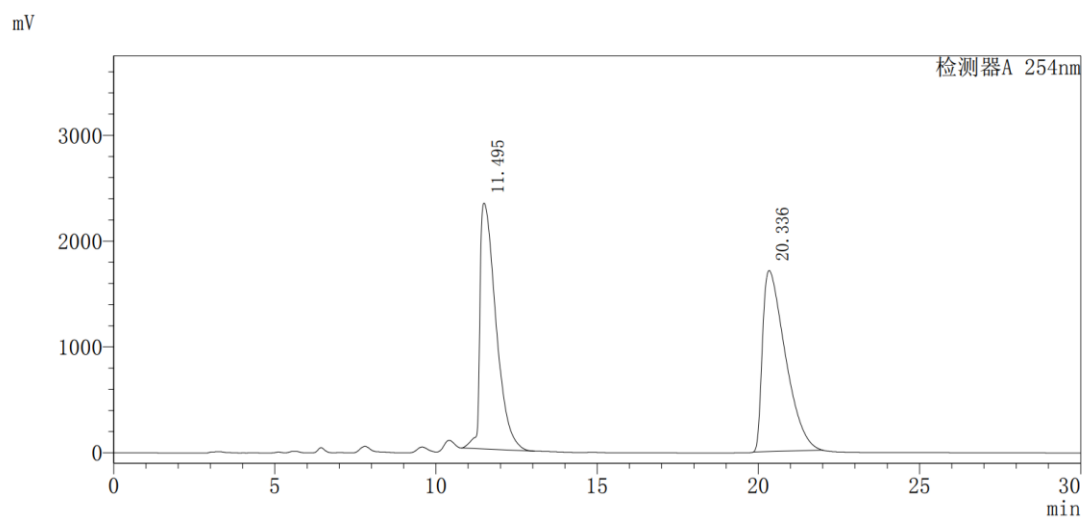

PDA Ch1 254nm

| Peak # | Ret. Time | Area      | Conc % |
|--------|-----------|-----------|--------|
| 1      | 11.495    | 80244428  | 48.768 |
| 2      | 20.336    | 84297169  | 51.232 |
| Total  |           | 164541597 | 100.0  |

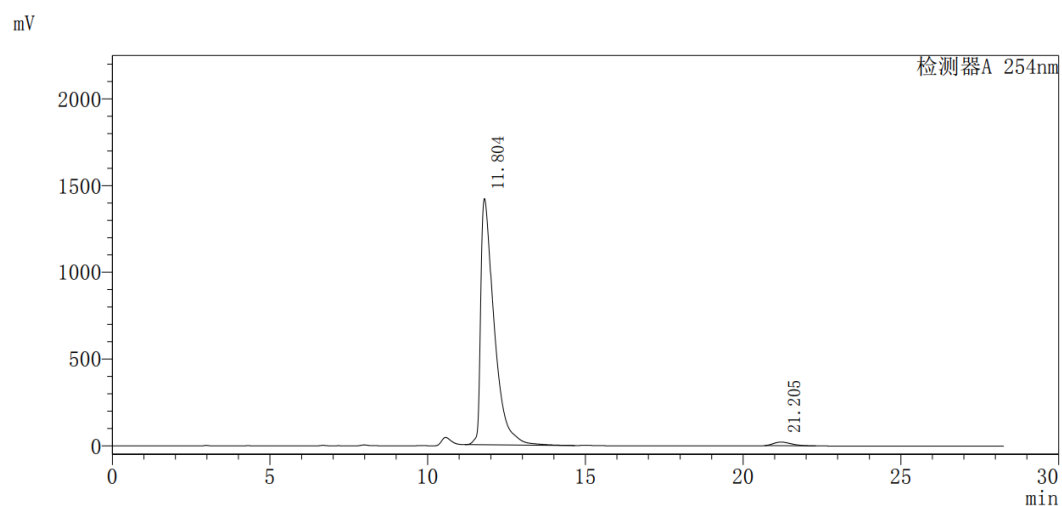

PDA Ch1 254nm

| Peak # | Ret. Time | Area     | Conc % | Ee % |
|--------|-----------|----------|--------|------|
| 1      | 11.804    | 41924600 | 98.099 | 96   |
| 2      | 21.205    | 812472   | 1.901  |      |
| Total  |           | 42737072 | 100.0  |      |

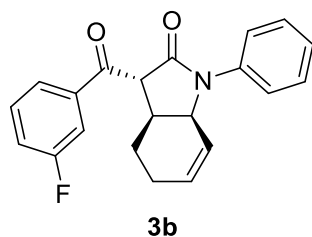

<色谱图>

mV

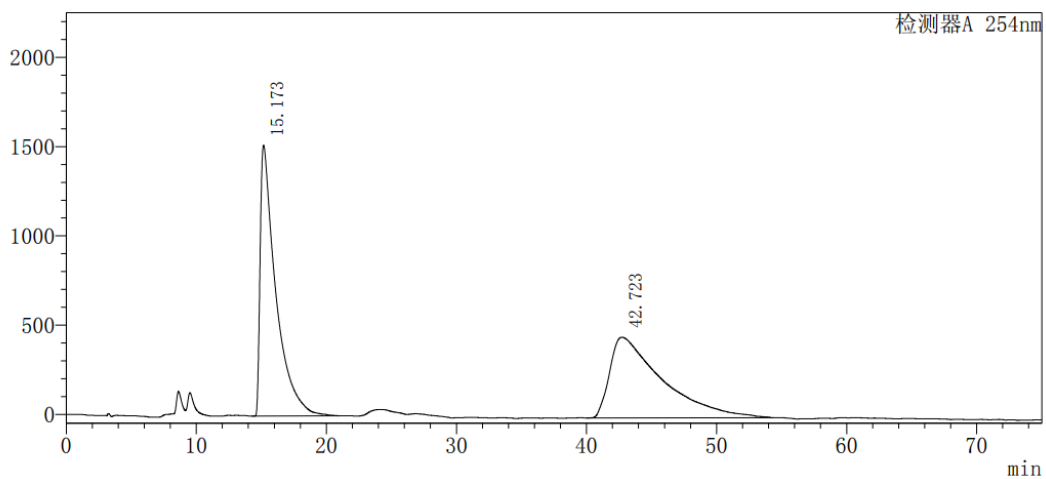

PDA Ch1 254nm

| Peak # | Ret. Time | Area      | Conc % |
|--------|-----------|-----------|--------|
| 1      | 15.173    | 126682962 | 50.083 |
| 2      | 42.723    | 126265429 | 49.917 |
| Total  |           | 252948391 | 100.0  |

mV

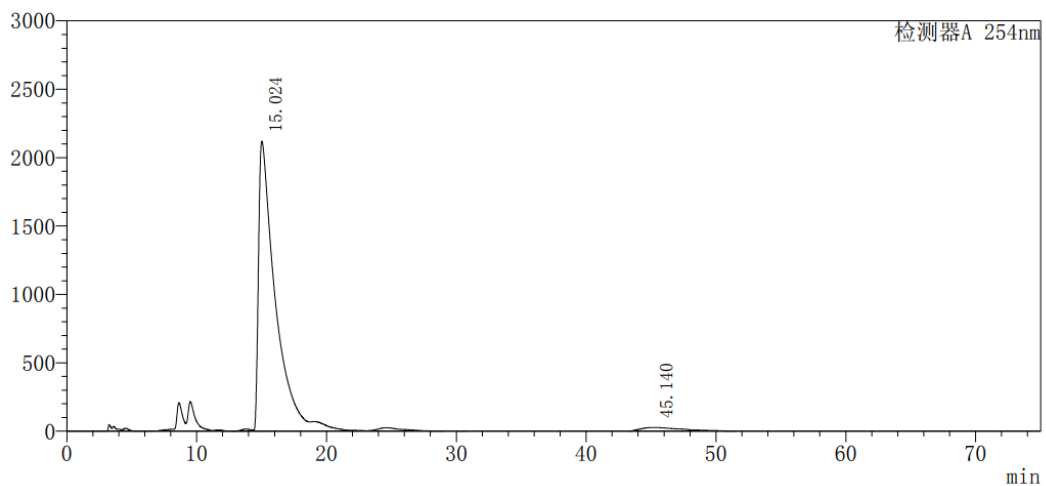

PDA Ch1 254nm

| Peak # | Ret. Time | Area      | Conc % | Ee % |
|--------|-----------|-----------|--------|------|
| 1      | 15.024    | 193601047 | 95.591 | 91   |
| 2      | 45.140    | 8929627   | 4.409  |      |
| Total  |           | 202530674 | 100.0  |      |

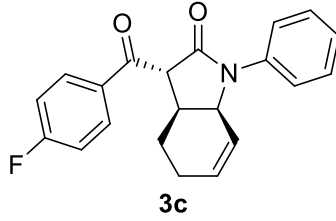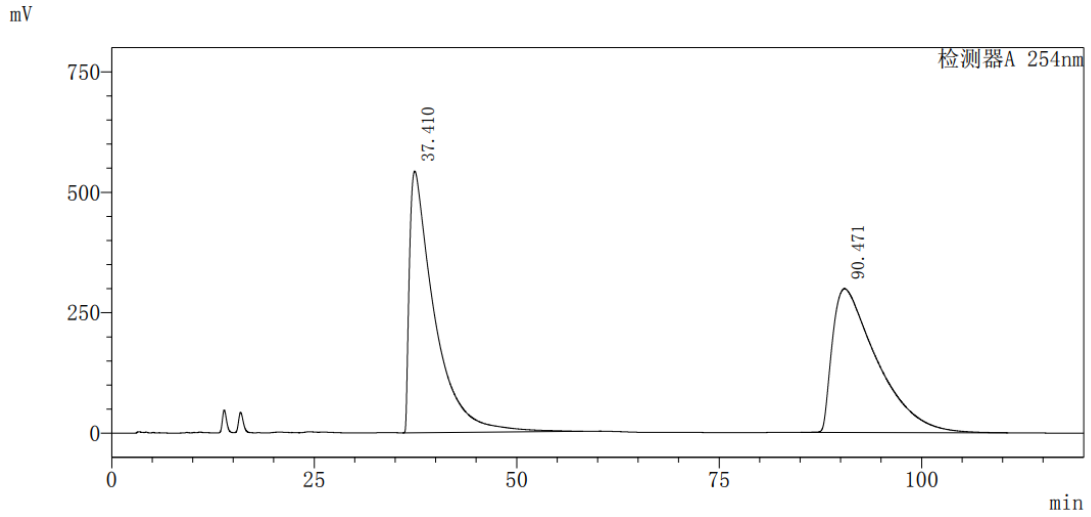

PDA Ch1 254nm

| Peak # | Ret. Time | Area      | Conc % |
|--------|-----------|-----------|--------|
| 1      | 37.410    | 116825858 | 50.504 |
| 2      | 90.471    | 114495771 | 49.496 |
| Total  |           | 231321629 | 100.0  |

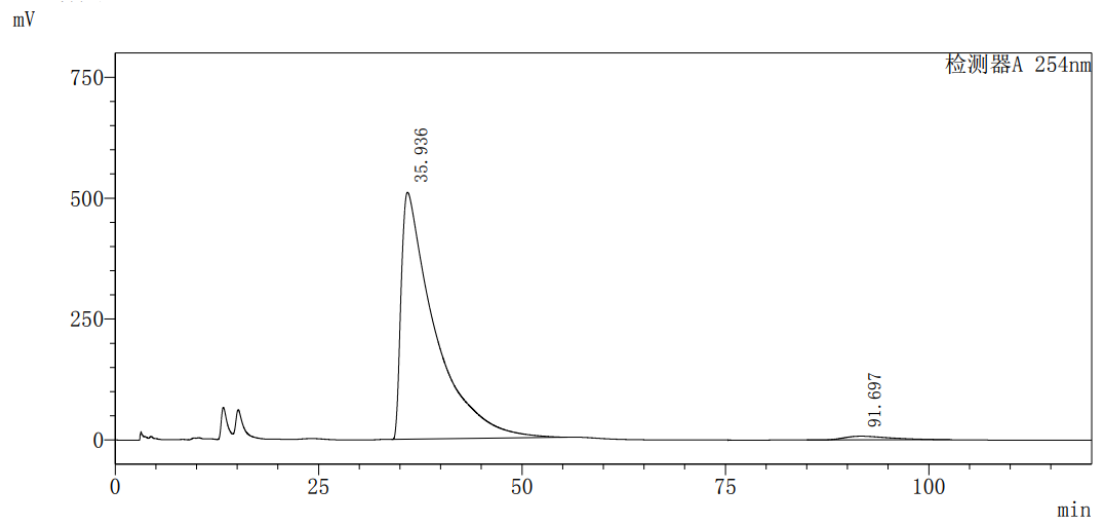

PDA Ch1 254nm

| Peak # | Ret. Time | Area      | Conc % | Ee % |
|--------|-----------|-----------|--------|------|
| 1      | 35.936    | 146048569 | 97.974 | 96   |
| 2      | 91.697    | 3020786   | 2.026  |      |
| Total  |           | 149069355 | 100.0  |      |

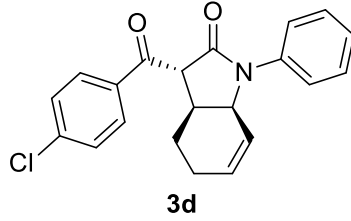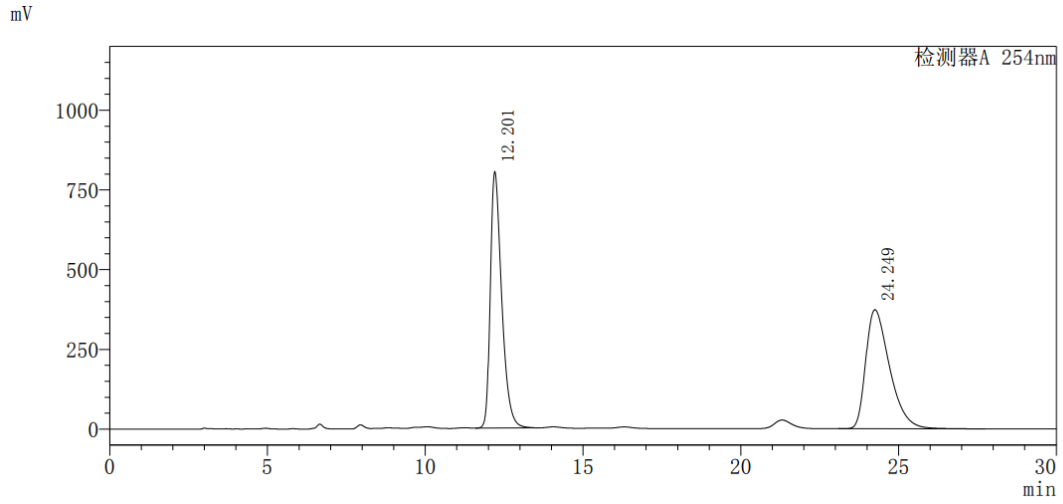

PDA Ch1 254nm

| Peak # | Ret. Time | Area     | Conc % |
|--------|-----------|----------|--------|
| 1      | 12.201    | 20027215 | 50.567 |
| 2      | 24.249    | 19578304 | 49.433 |
| Total  |           | 39605519 | 100.0  |

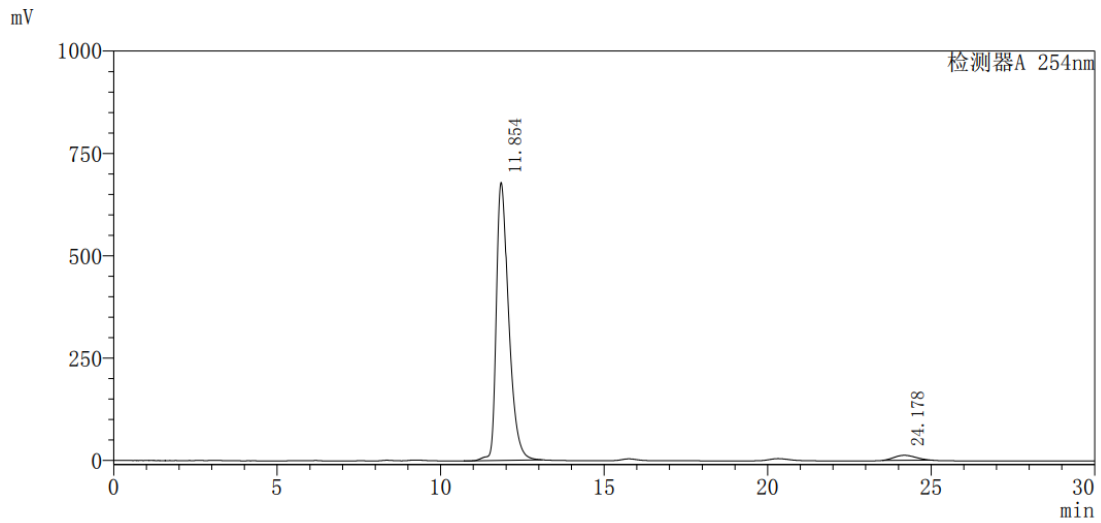

| Peak # | Ret. Time | Area     | Conc % | Ee % |
|--------|-----------|----------|--------|------|
| 1      | 11.854    | 17714349 | 96.923 | 94   |
| 2      | 24.178    | 562442   | 3.077  |      |
| Total  |           | 18276791 | 100.0  |      |

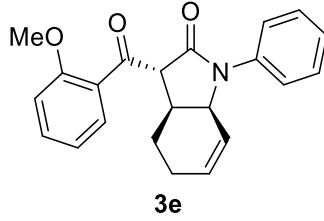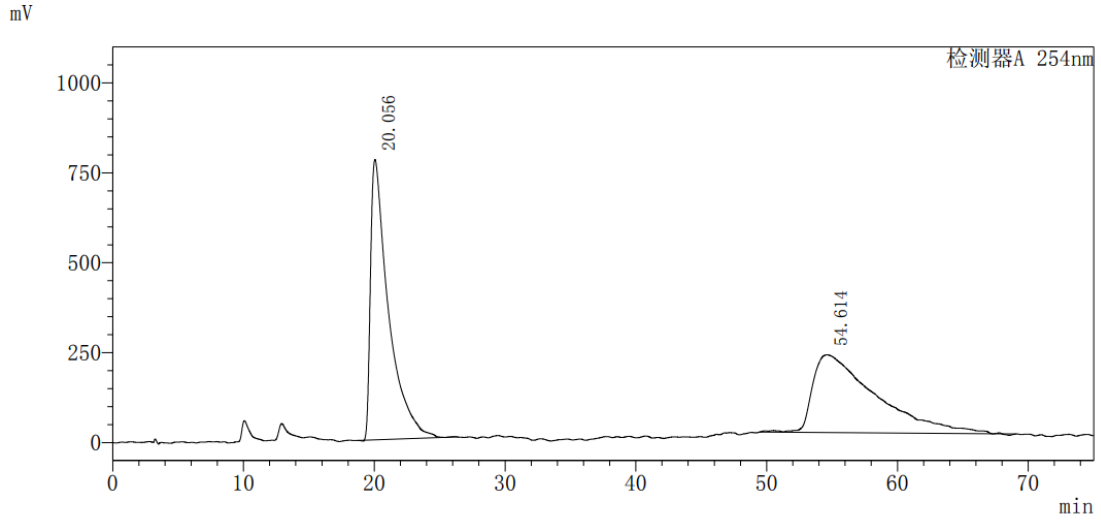

PDA Ch1 254nm

| Peak # | Ret. Time | Area      | Conc % |
|--------|-----------|-----------|--------|
| 1      | 20.056    | 74549757  | 50.512 |
| 2      | 54.614    | 73038154  | 49.488 |
| Total  |           | 147587911 | 100    |

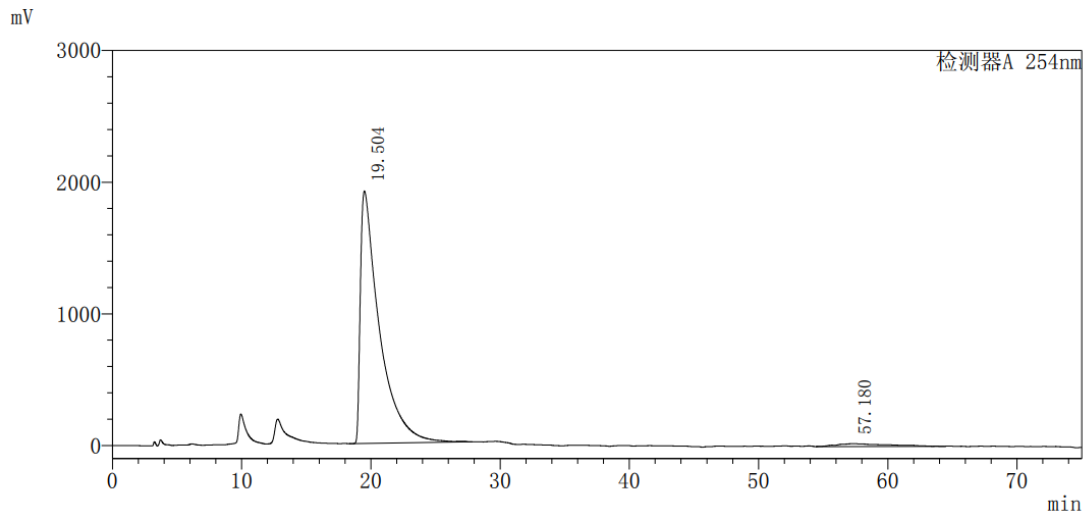

PDA Ch1 254nm

| Peak # | Ret. Time | Area      | Conc % | Ee % |
|--------|-----------|-----------|--------|------|
| 1      | 19.504    | 196126260 | 96.951 | 94   |
| 2      | 57.180    | 6168546   | 3.049  |      |
| Total  |           | 202294806 | 100.0  |      |

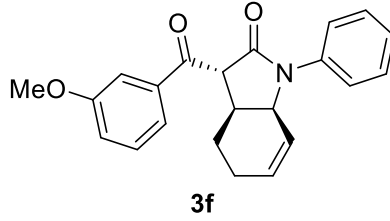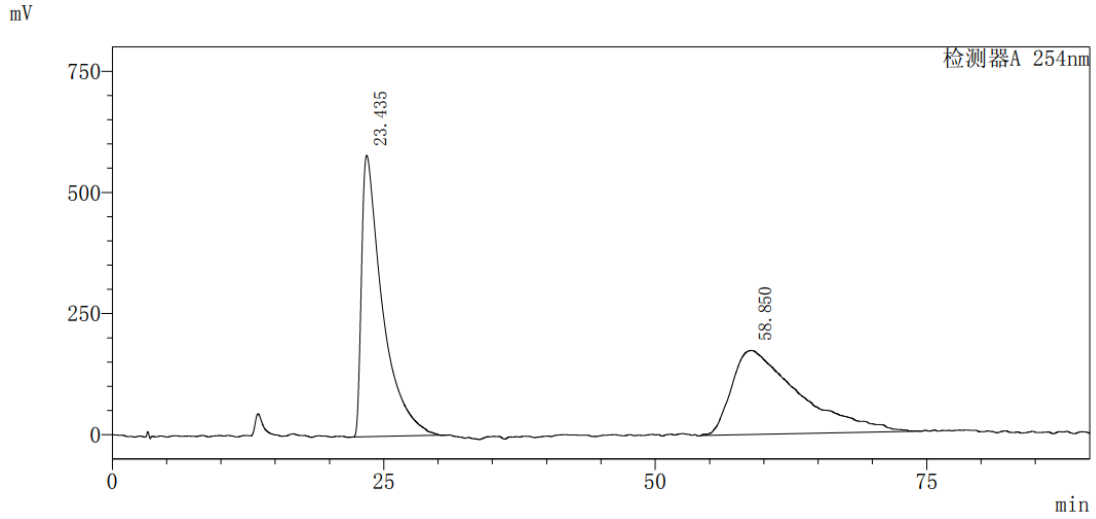

PDA Ch1 254nm

| Peak # | Ret. Time | Area      | Conc % |
|--------|-----------|-----------|--------|
| 1      | 23.435    | 77616480  | 50.965 |
| 2      | 58.850    | 74676792  | 49.035 |
| Total  |           | 152293273 | 100.0  |

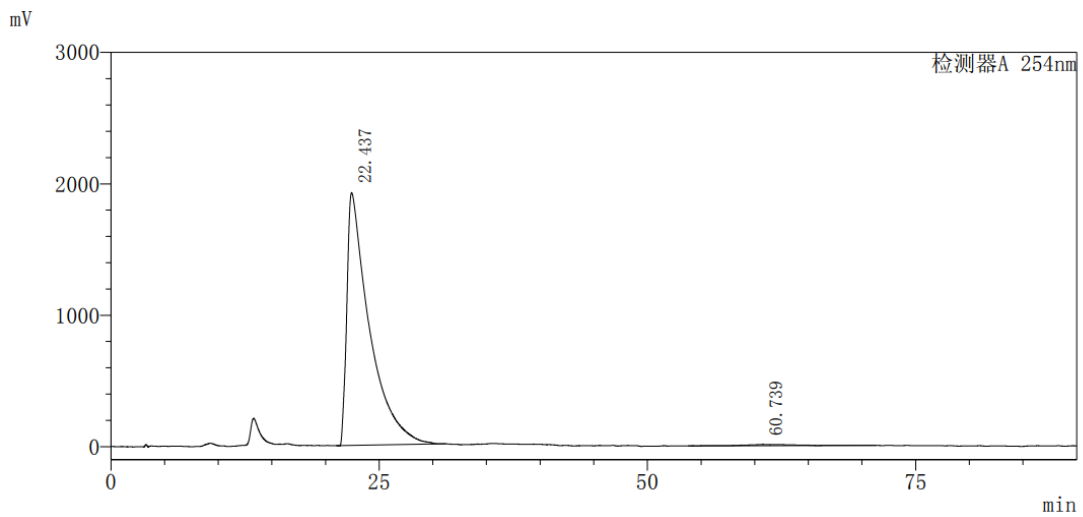

PDA Ch1 254nm

| Peak # | Ret. Time | Area      | Conc % | Ee % |
|--------|-----------|-----------|--------|------|
| 1      | 22.437    | 280592380 | 98.952 | 98   |
| 2      | 60.739    | 2970431   | 1.048  |      |
| Total  |           | 283562811 | 100.0  |      |



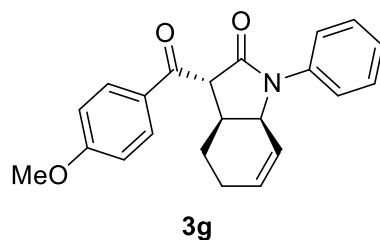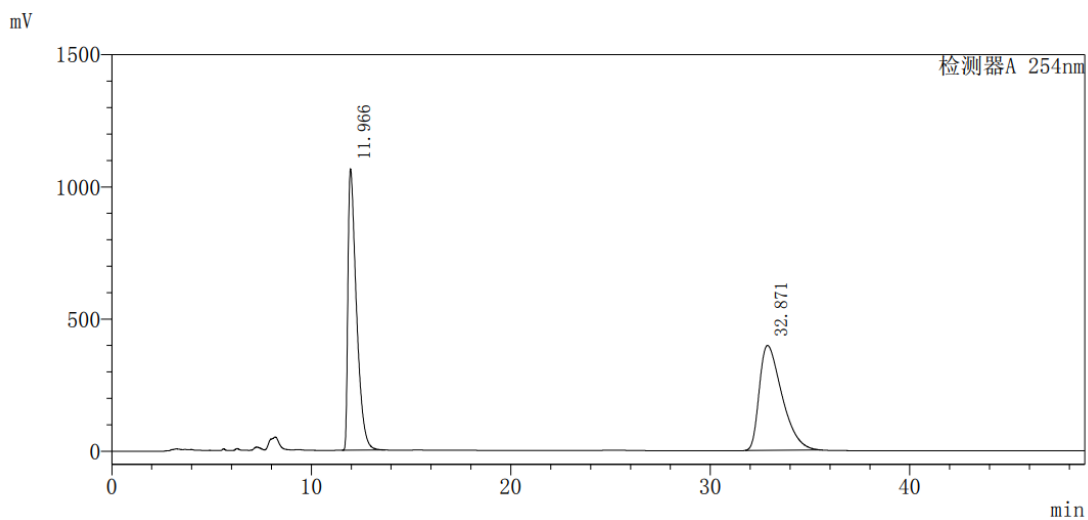

PDA Ch1 254nm

| Peak # | Ret. Time | Area     | Conc % |
|--------|-----------|----------|--------|
| 1      | 11.966    | 31565229 | 50.204 |
| 2      | 32.871    | 31308549 | 49.796 |
| Total  |           | 62873778 | 100.0  |

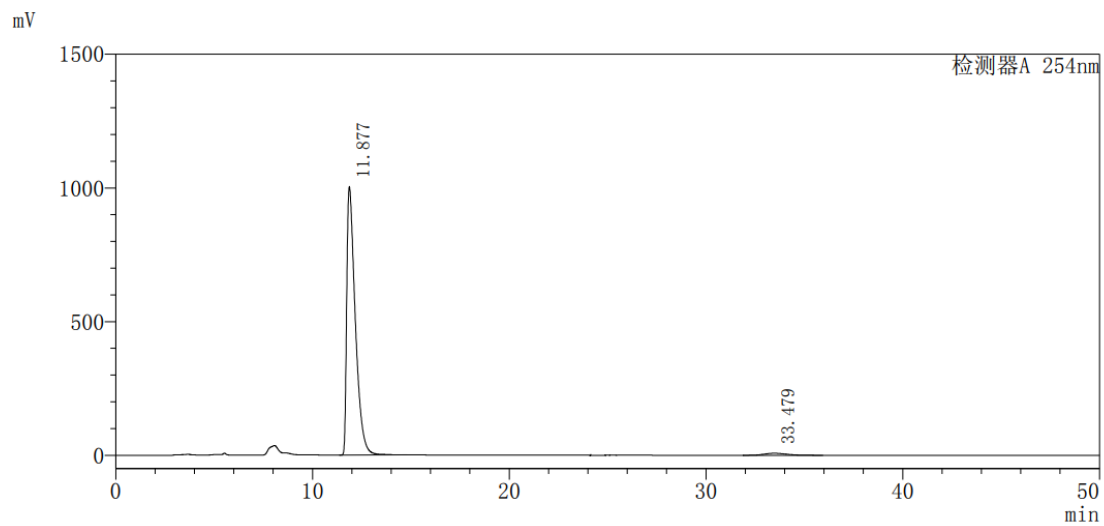

PDA Ch1 254nm

| Peak # | Ret. Time | Area     | Conc % | Ee % |
|--------|-----------|----------|--------|------|
| 1      | 11.877    | 30333910 | 98.090 | 96   |
| 2      | 33.479    | 590525   | 1.910  |      |
| Total  |           | 30924435 | 100.0  |      |

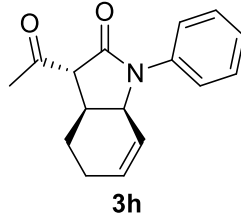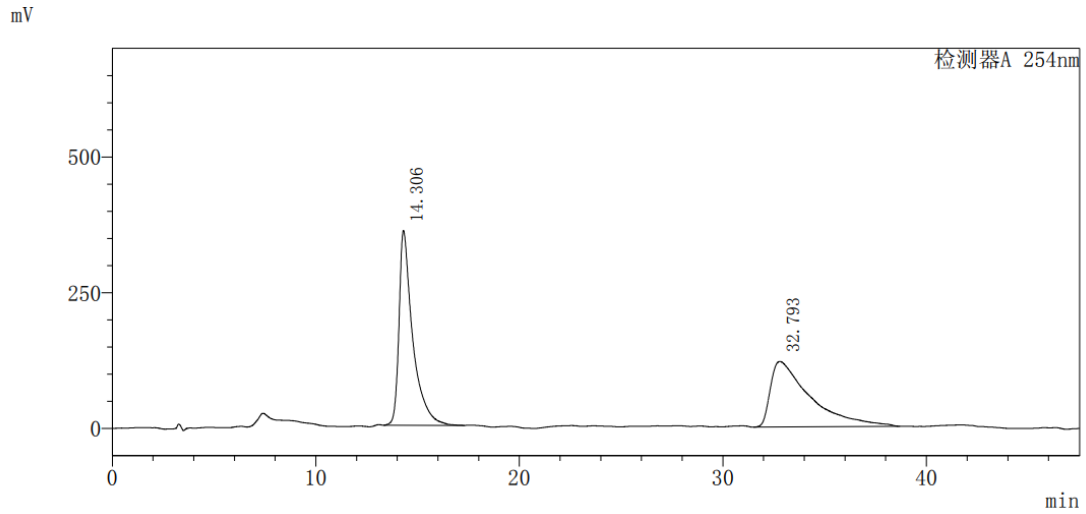

PDA Ch1 254nm

| Peak # | Ret. Time | Area     | Conc % |
|--------|-----------|----------|--------|
| 1      | 14.306    | 16710655 | 50.477 |
| 2      | 32.793    | 16394805 | 49.523 |
| Total  |           | 33105460 | 100.0  |

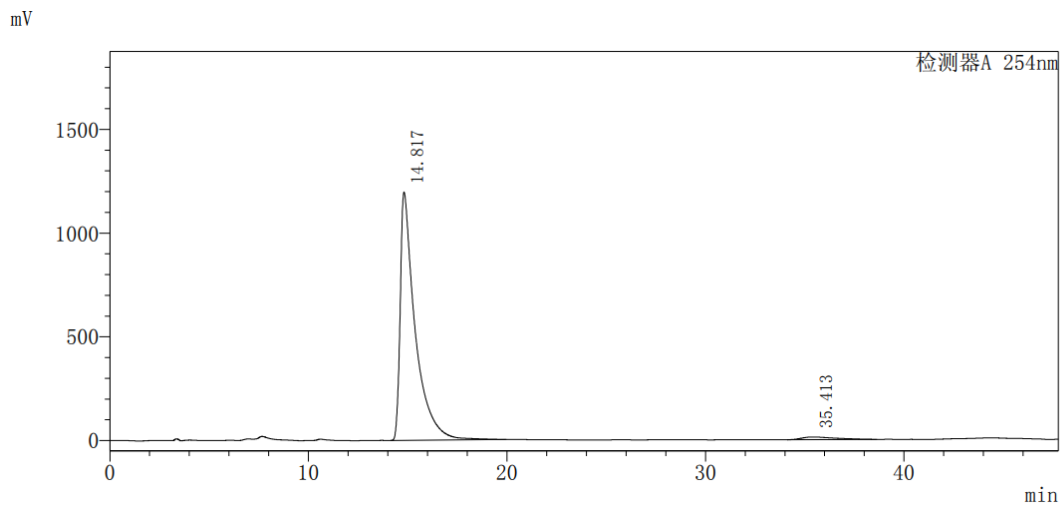

PDA Ch1 254nm

| Peak # | Ret. Time | Area     | Conc % | Ee % |
|--------|-----------|----------|--------|------|
| 1      | 14.817    | 62598860 | 97.690 | 95   |
| 2      | 35.413    | 1480430  | 2.310  |      |
| Total  |           | 64079289 | 100.0  |      |

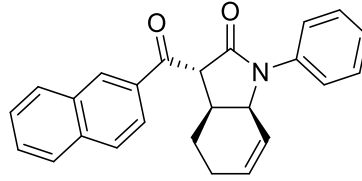

**3i**

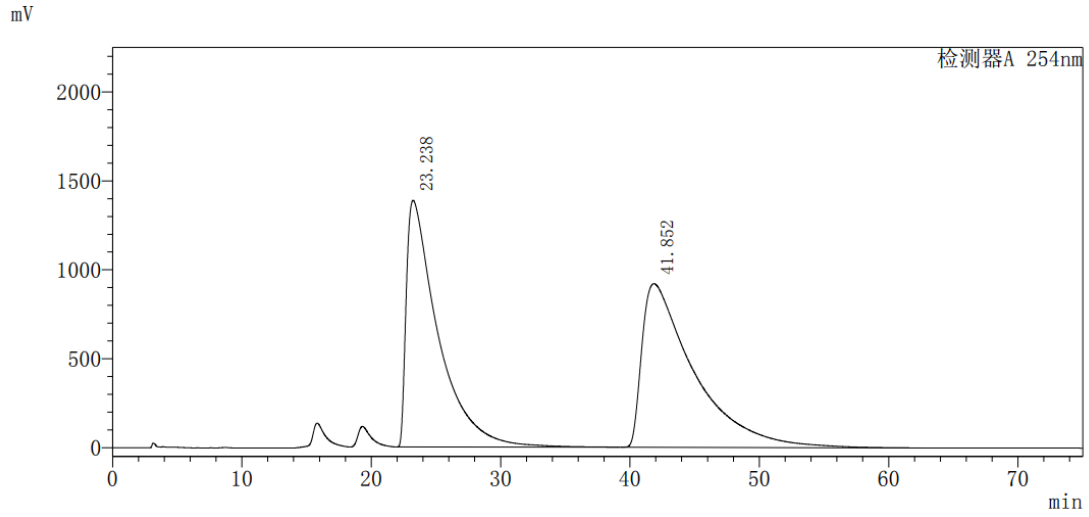

PDA Ch1 254nm

| Peak # | Ret. Time | Area      | Conc % |
|--------|-----------|-----------|--------|
| 1      | 23.238    | 236929829 | 47.863 |
| 2      | 41.852    | 258088066 | 52.137 |
| Total  |           | 495017895 | 100.0  |

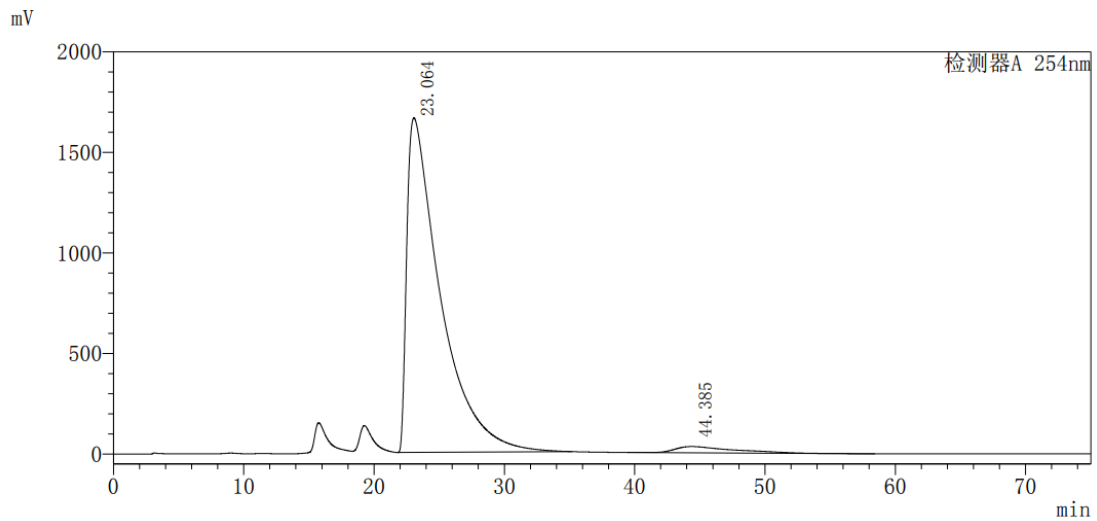

PDA Ch1 254nm

| Peak # | Ret. Time | Area      | Conc % | Ee % |
|--------|-----------|-----------|--------|------|
| 1      | 23.064    | 298034514 | 96.868 | 94   |
| 2      | 44.385    | 9637003   | 3.132  |      |
| Total  |           | 307671516 | 100.0  |      |

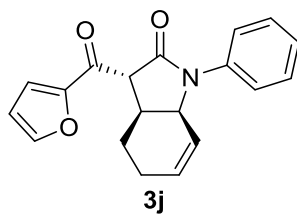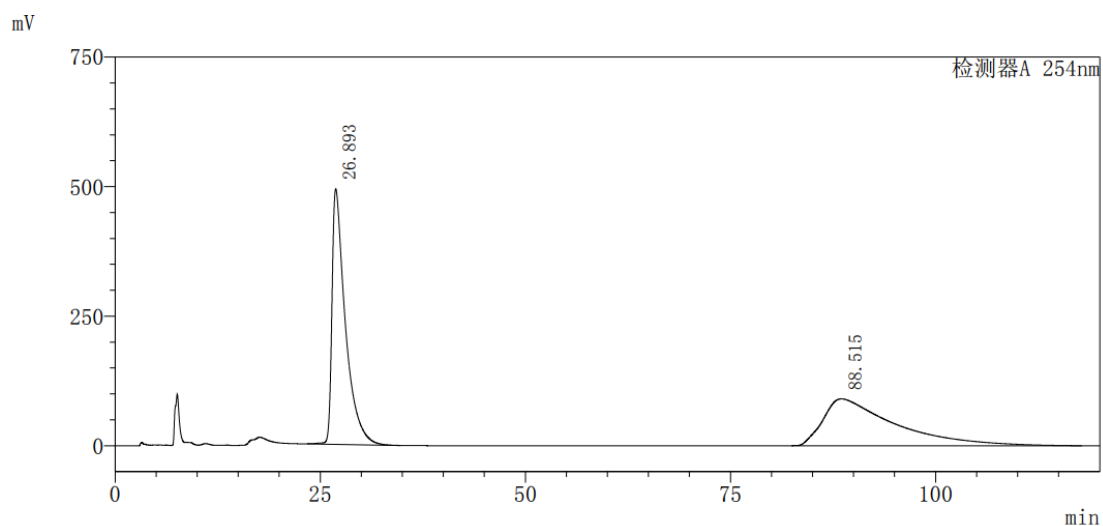

PDA Ch1 254nm

| Peak # | Ret. Time | Area      | Conc % |
|--------|-----------|-----------|--------|
| 1      | 26.893    | 55929278  | 50.555 |
| 2      | 88.515    | 54700704  | 49.445 |
| Total  |           | 110629981 | 100.0  |

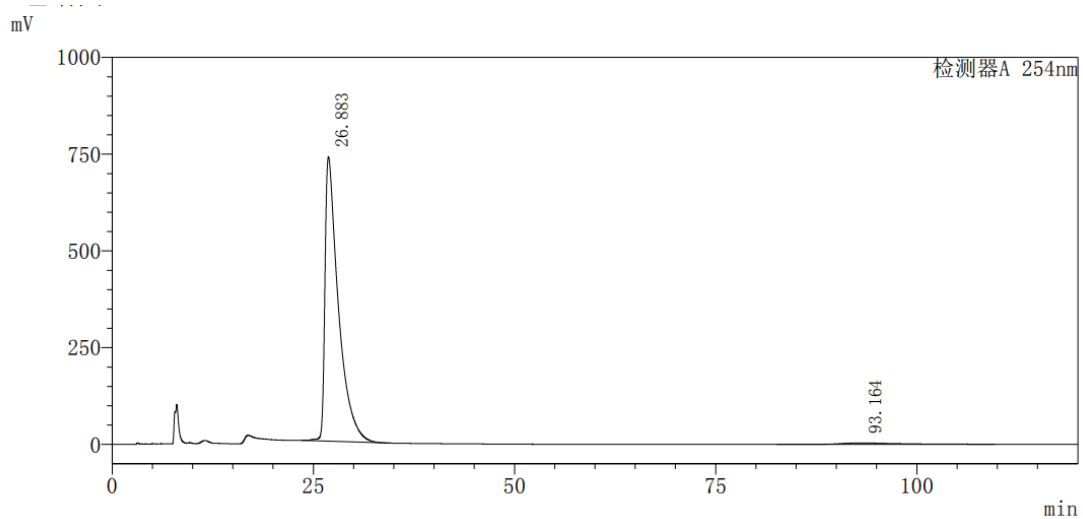

PDA Ch1 254nm

| Peak # | Ret. Time | Area     | Conc % | Ee % |
|--------|-----------|----------|--------|------|
| 1      | 26.883    | 85321767 | 98.115 | 96   |
| 2      | 93.164    | 1639500  | 1.885  |      |
| Total  |           | 86961268 | 100.0  |      |

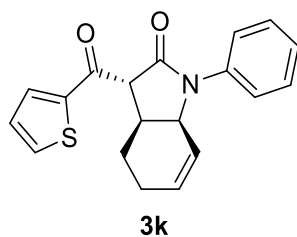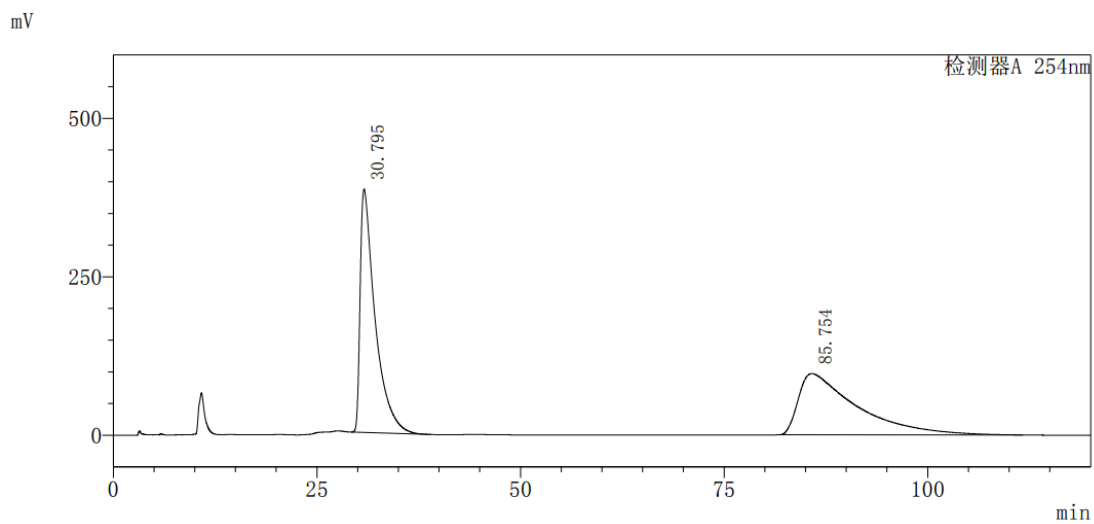

PDA Ch1 254nm

| Peak # | Ret. Time | Area     | Conc % |
|--------|-----------|----------|--------|
| 1      | 30.795    | 48961409 | 50.404 |
| 2      | 85.754    | 48175603 | 49.596 |
| Total  |           | 97137012 | 100.0  |

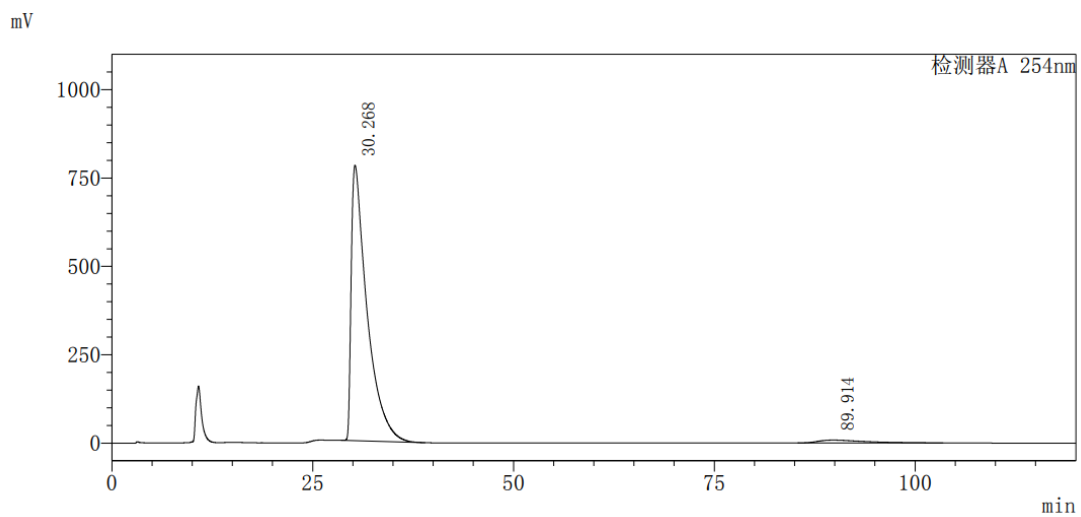

PDA Ch1 254nm

| Peak # | Ret. Time | Area      | Conc % | Ee % |
|--------|-----------|-----------|--------|------|
| 1      | 30.268    | 106335844 | 96.956 | 94   |
| 2      | 89.914    | 3338142   | 3.044  |      |
| Total  |           | 109673986 | 100.0  |      |

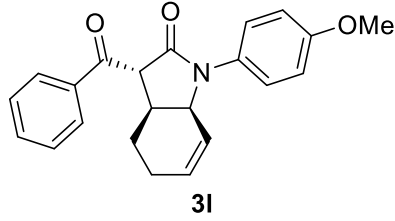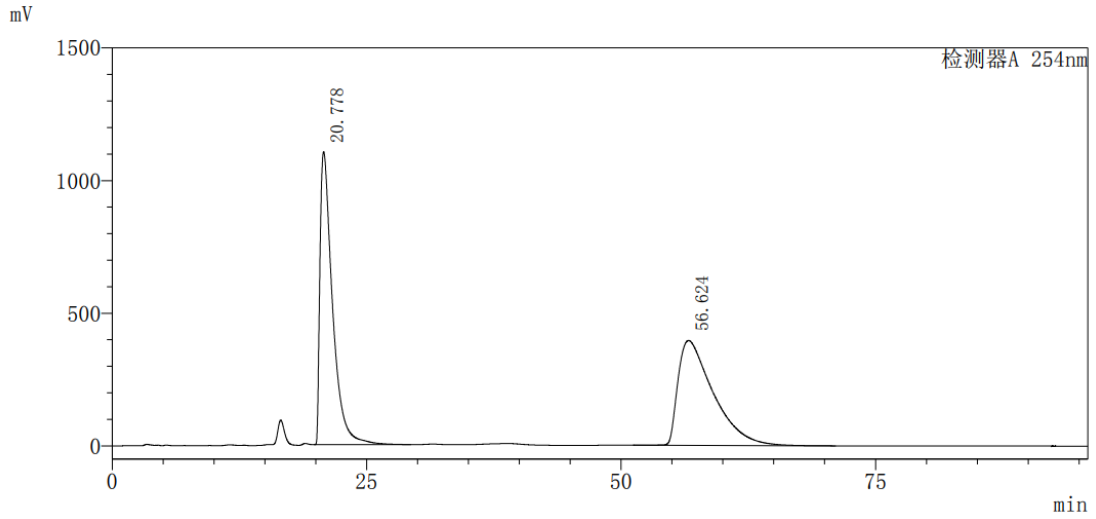

PDA Ch1 254nm

| Peak # | Ret. Time | Area      | Conc % |
|--------|-----------|-----------|--------|
| 1      | 20.778    | 94816732  | 49.851 |
| 2      | 56.624    | 95383666  | 50.149 |
| Total  |           | 190200398 | 100    |

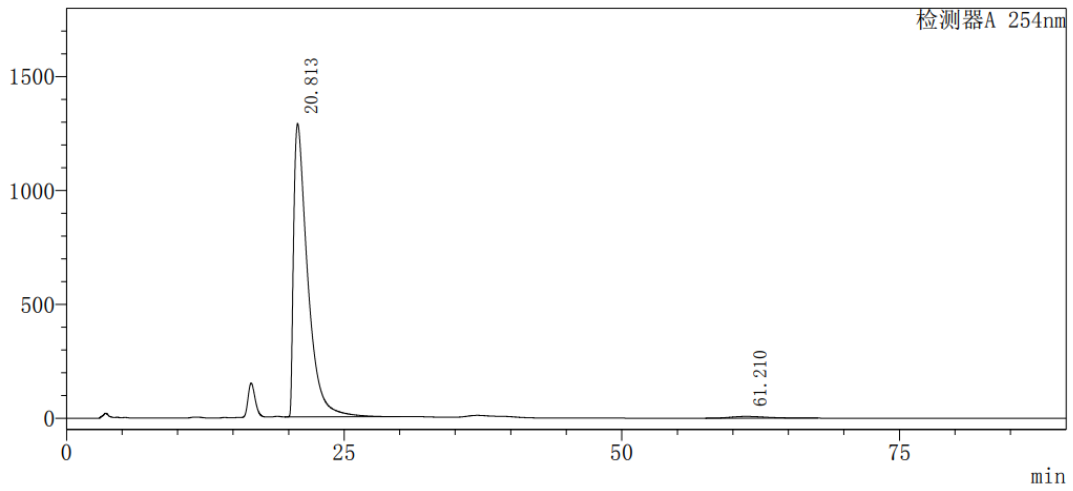

PDA Ch1 254nm

| Peak # | Ret. Time | Area      | Conc % | Ee % |
|--------|-----------|-----------|--------|------|
| 1      | 20.813    | 113734511 | 98.536 | 97   |
| 2      | 61.210    | 1689303   | 1.464  |      |
| Total  |           | 115423814 | 100    |      |

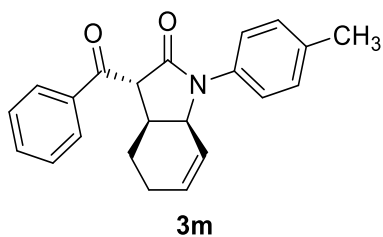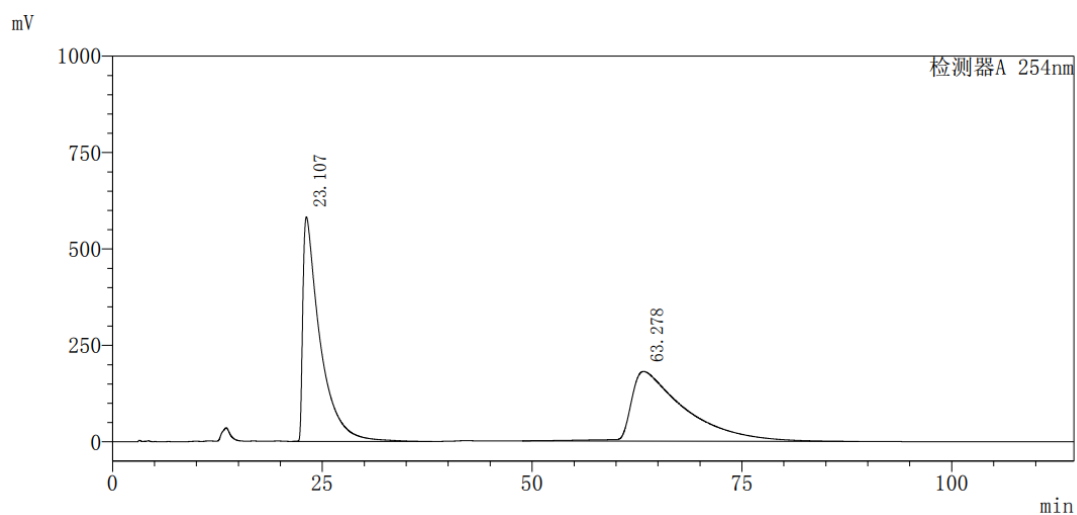

PDA Ch1 254nm

| Peak # | Ret. Time | Area      | Conc % |
|--------|-----------|-----------|--------|
| 1      | 23.107    | 83236222  | 51.029 |
| 2      | 63.278    | 79879754  | 48.971 |
| Total  |           | 163115976 | 100    |

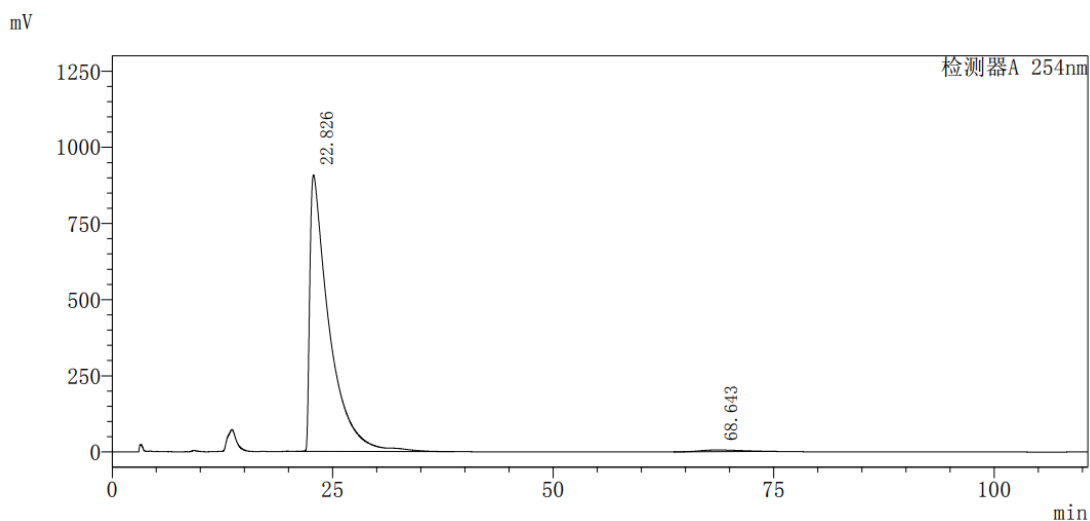

PDA Ch1 254nm

| Peak # | Ret. Time | Area      | Conc % | Ee % |
|--------|-----------|-----------|--------|------|
| 1      | 22.826    | 138824302 | 98.750 | 98   |
| 2      | 68.643    | 1757005   | 1.250  |      |
| Total  |           | 140581306 | 100.0  |      |

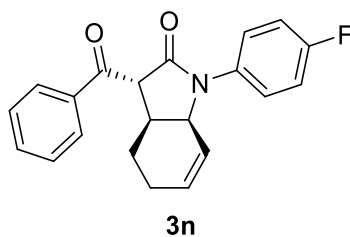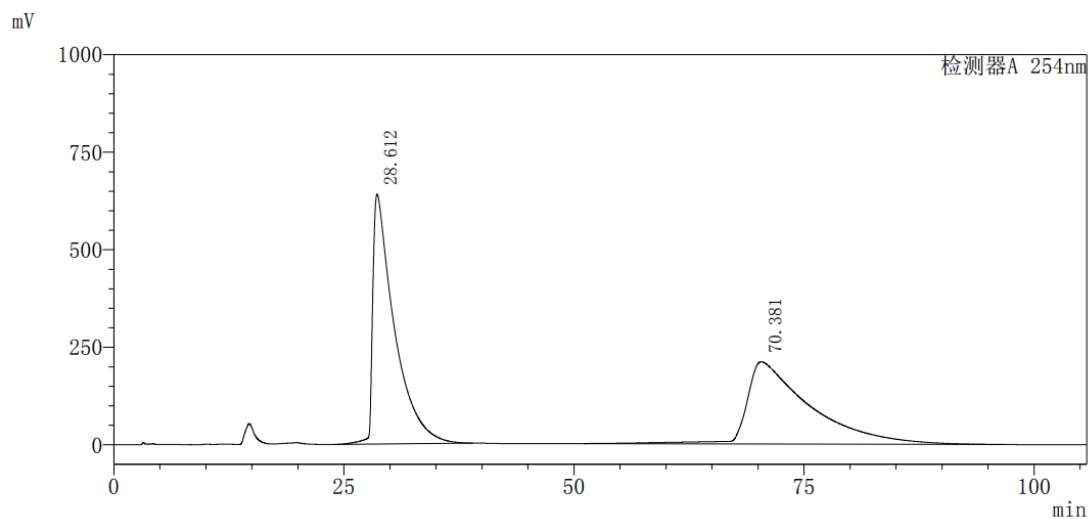

PDA Ch1 254nm

| Peak # | Ret. Time | Area      | Conc % |
|--------|-----------|-----------|--------|
| 1      | 28.612    | 104367070 | 50.990 |
| 2      | 70.381    | 100314449 | 49.010 |
| Total  |           | 204681519 | 100.0  |

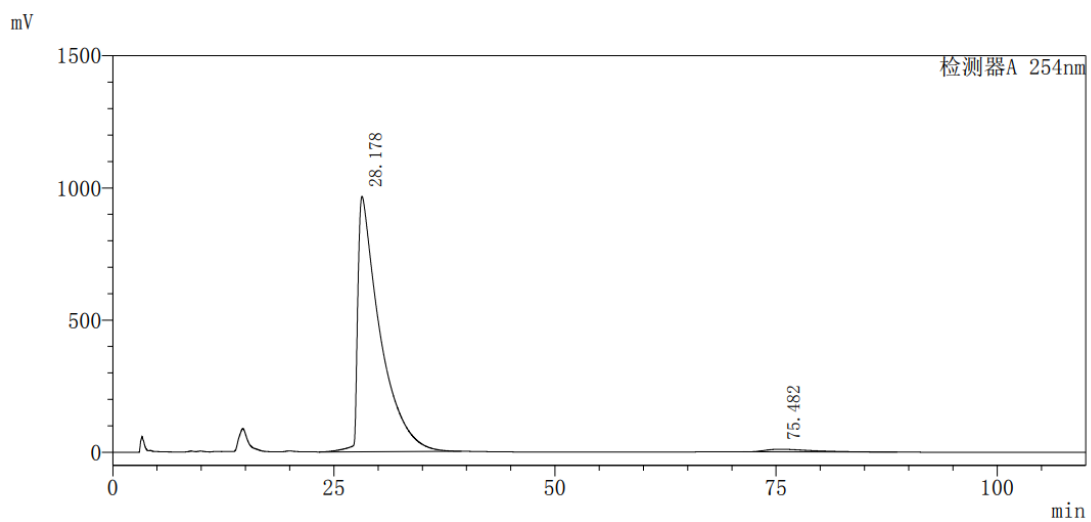

PDA Ch1 254nm

| Peak # | Ret. Time | Area      | Conc % | Ee % |
|--------|-----------|-----------|--------|------|
| 1      | 28.178    | 168465567 | 97.795 | 96   |
| 2      | 75.482    | 3797706   | 2.205  |      |
| Total  |           | 172263272 | 100.0  |      |



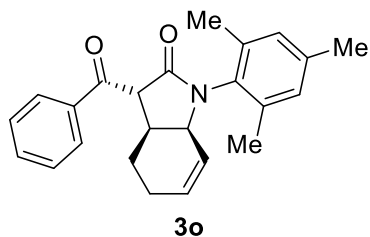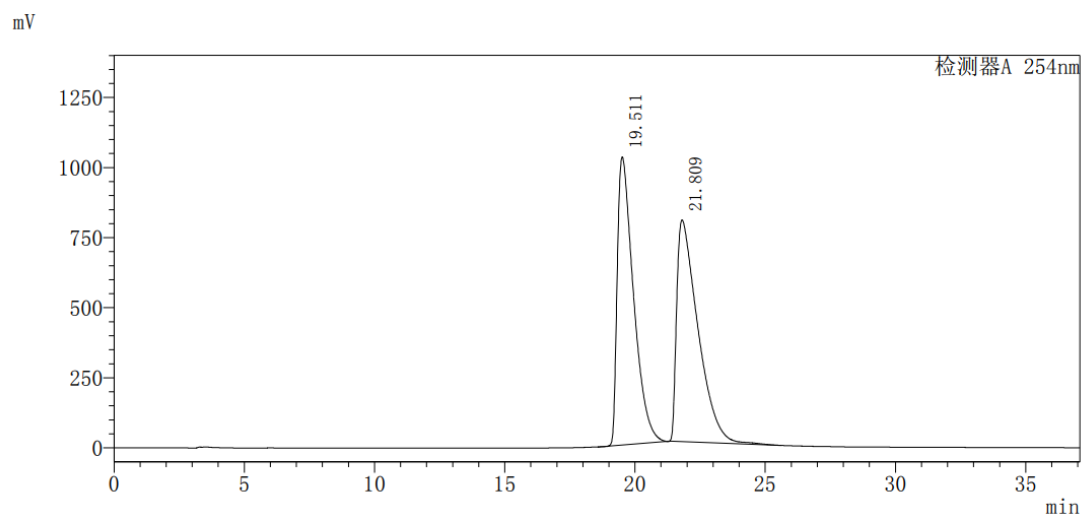

PDA Ch1 254nm

| Peak # | Ret. Time | Area     | Conc % |
|--------|-----------|----------|--------|
| 1      | 19.511    | 44593317 | 49.851 |
| 2      | 21.809    | 44860443 | 50.149 |
| Total  |           | 89453760 | 100.0  |

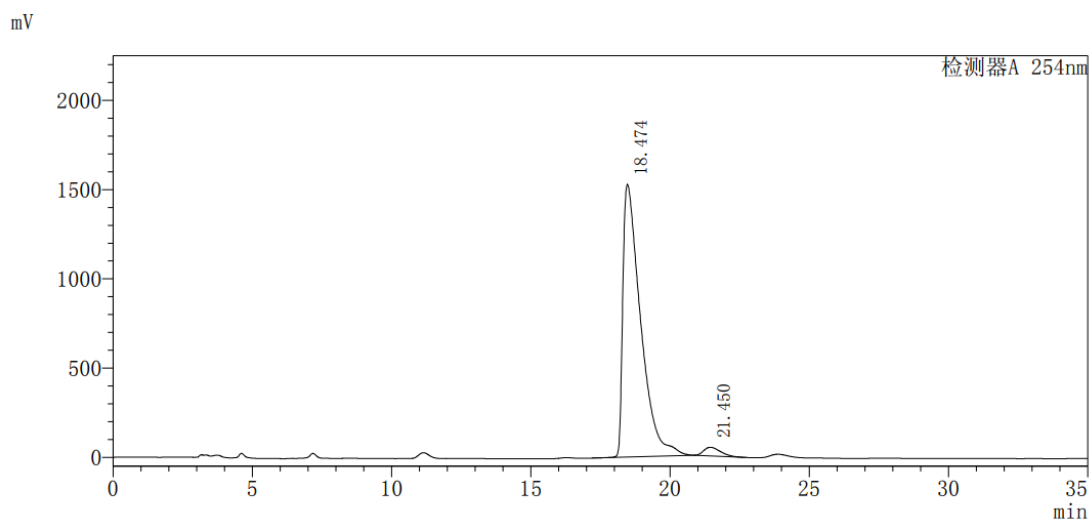

PDA Ch1 254nm

| Peak # | Ret. Time | Area     | Conc % | Ee % |
|--------|-----------|----------|--------|------|
| 1      | 18.474    | 67804317 | 97.081 | 94   |
| 2      | 21.450    | 2038432  | 2.919  |      |
| Total  |           | 69842748 | 100.0  |      |

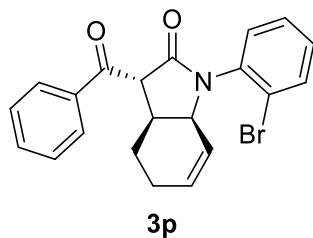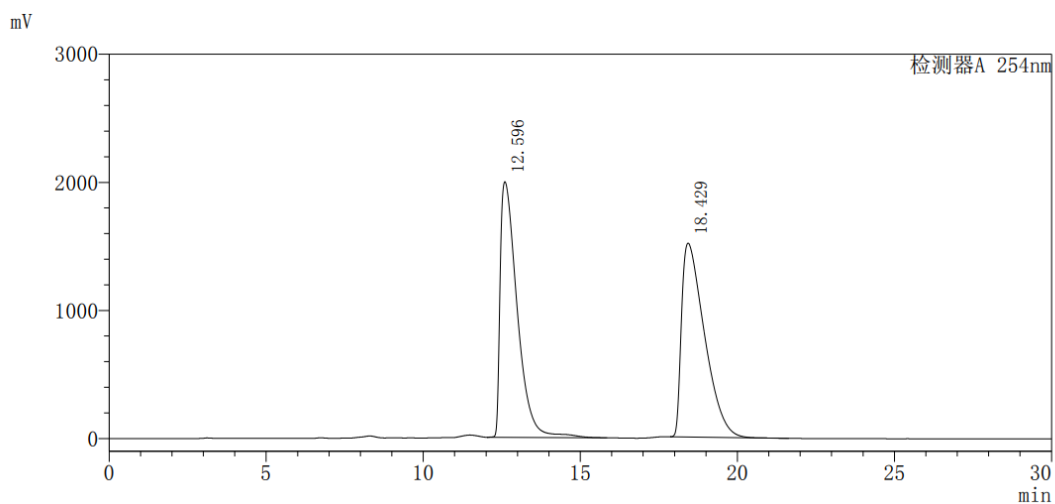

PDA Ch1 254nm

| Peak # | Ret. Time | Area      | Conc % |
|--------|-----------|-----------|--------|
| 1      | 12.596    | 75437304  | 49.497 |
| 2      | 18.429    | 76970711  | 50.503 |
| Total  |           | 152408015 | 100.0  |

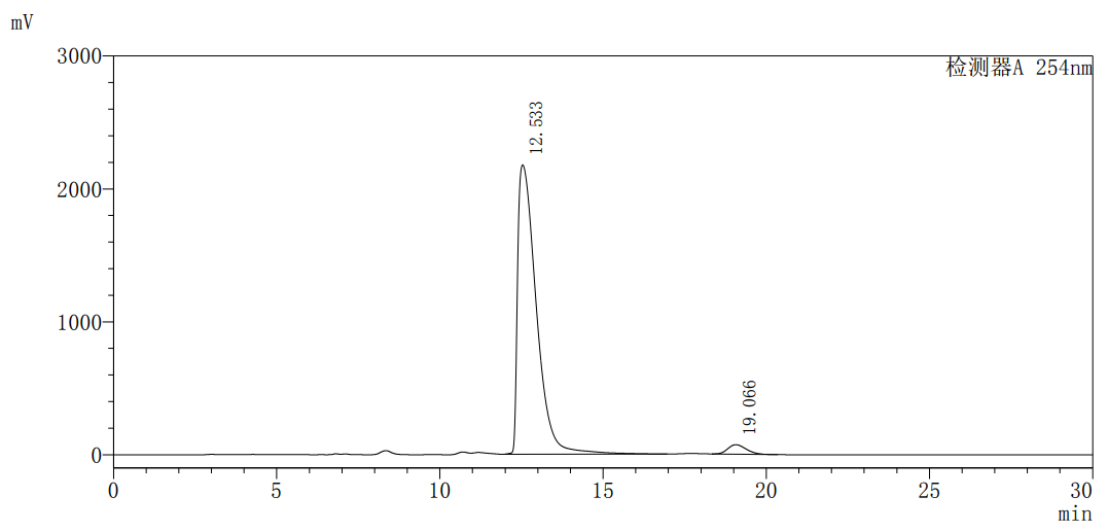

PDA Ch1 254nm

| Peak # | Ret. Time | Area     | Conc % | Ee % |
|--------|-----------|----------|--------|------|
| 1      | 12.533    | 86963396 | 96.878 | 94   |
| 2      | 19.066    | 2802924  | 3.122  |      |
| Total  |           | 89766319 | 100.0  |      |

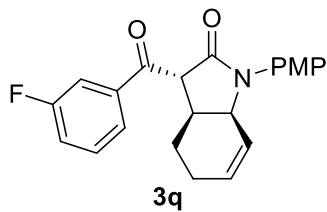

<色谱图>

mV

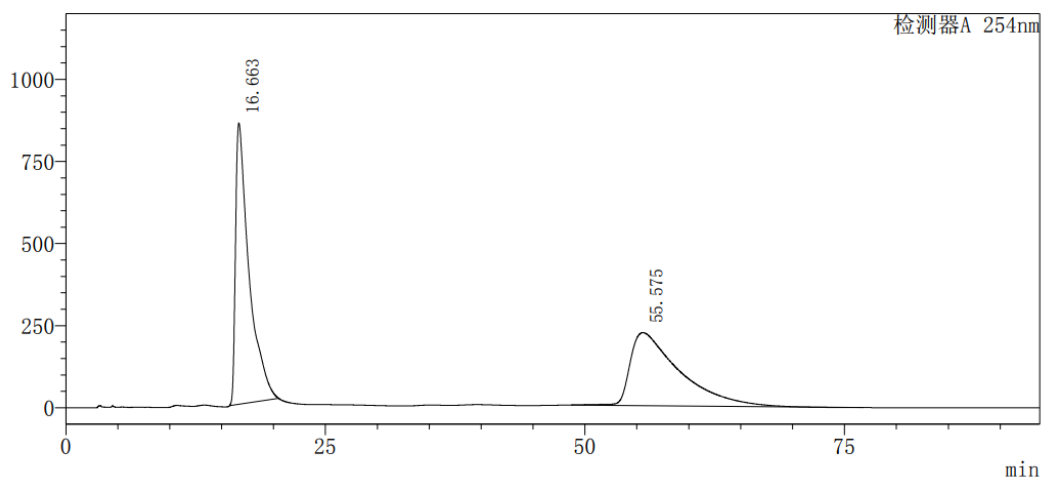

PDA Ch1 254nm

| Peak # | Ret. Time | Area      | Conc % |
|--------|-----------|-----------|--------|
| 1      | 16.663    | 77261605  | 51.260 |
| 2      | 55.575    | 73461983  | 48.740 |
| Total  |           | 150723589 | 100.0  |

mV

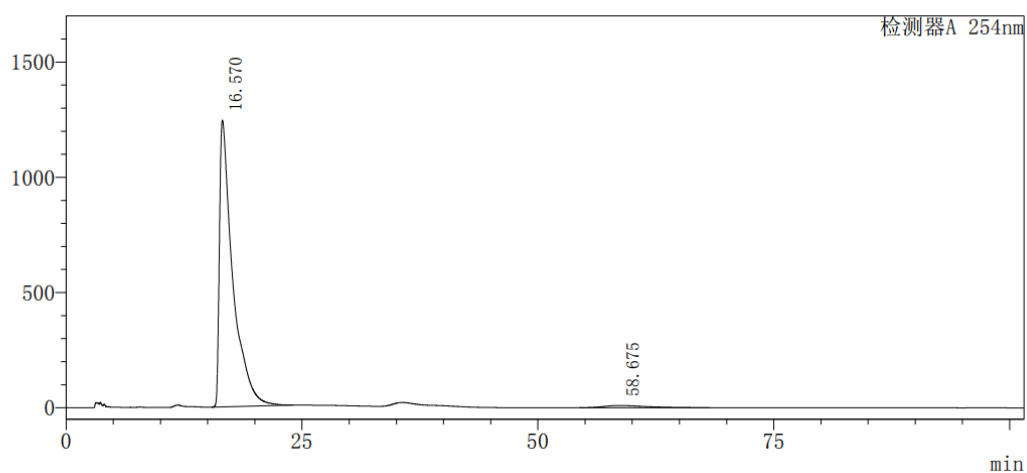

PDA Ch1 254nm

| Peak # | Ret. Time | Area      | Conc % | Ee % |
|--------|-----------|-----------|--------|------|
| 1      | 16.570    | 122018386 | 97.612 | 95   |
| 2      | 58.675    | 2985415   | 2.388  |      |
| Total  |           | 125003801 | 100.0  |      |

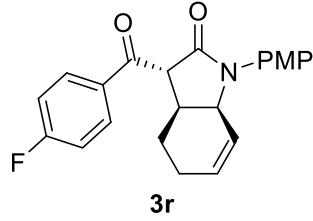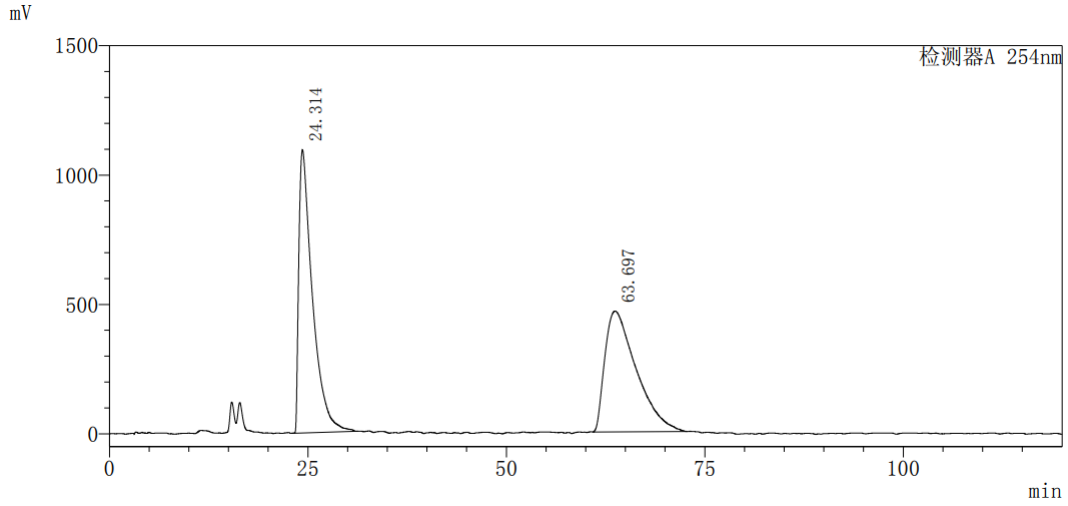

PDA Ch1 254nm

| Peak # | Ret. Time | Area      | Conc % |
|--------|-----------|-----------|--------|
| 1      | 24.314    | 130499501 | 50.372 |
| 2      | 63.697    | 128570211 | 49.628 |
| Total  |           | 259069713 | 100.0  |

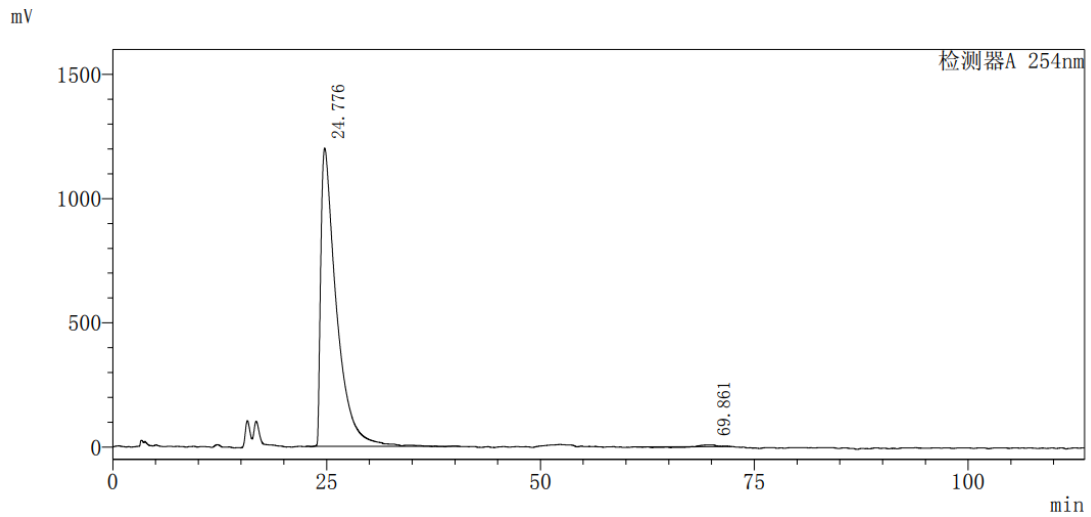

PDA Ch1 254nm

| Peak # | Ret. Time | Area      | Conc % | Ee % |
|--------|-----------|-----------|--------|------|
| 1      | 24.776    | 153469977 | 99.838 | 99   |
| 2      | 69.861    | 249678    | 0.162  |      |
| Total  |           | 153719656 | 100.0  |      |

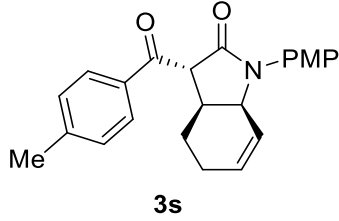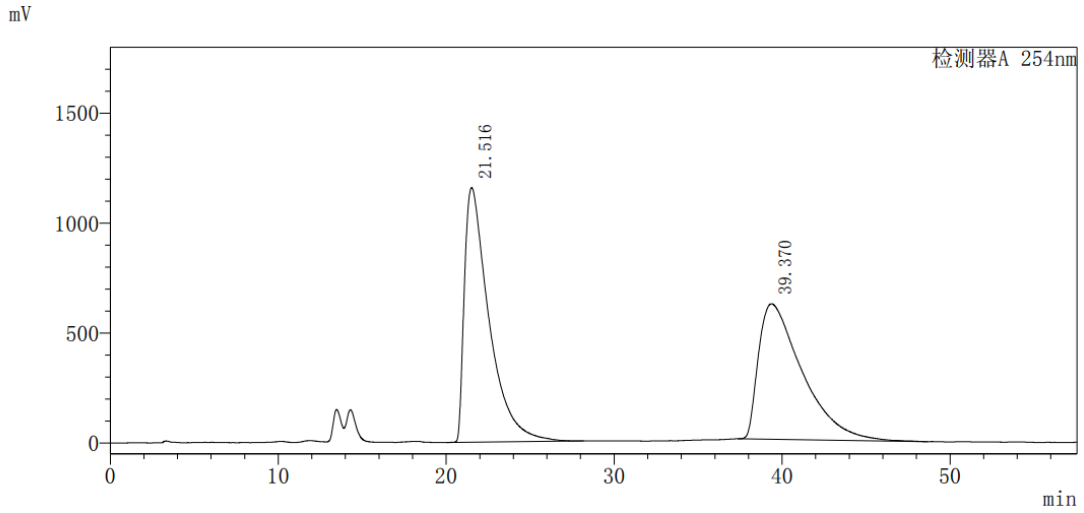

PDA Ch1 254nm

| Peak # | Ret. Time | Area      | Conc % |
|--------|-----------|-----------|--------|
| 1      | 21.516    | 118505471 | 51.381 |
| 2      | 39.370    | 112134000 | 48.619 |
| Total  |           | 230639470 | 100.0  |

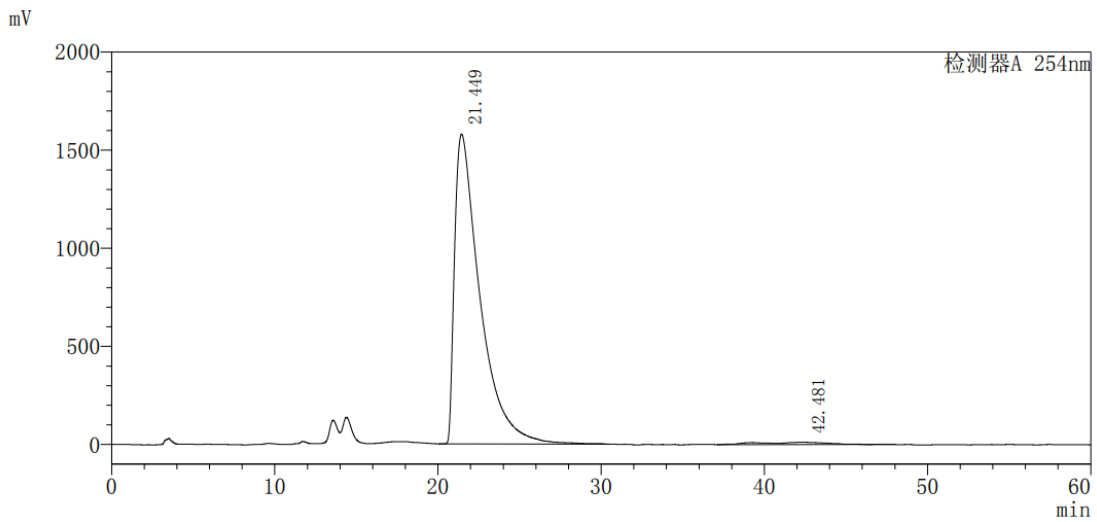

PDA Ch1 254nm

| Peak # | Ret. Time | Area      | Conc % | Ee % |
|--------|-----------|-----------|--------|------|
| 1      | 21.449    | 171319008 | 98.041 | 96   |
| 2      | 42.481    | 3423404   | 1.959  |      |
| Total  |           | 174742412 | 100.0  |      |

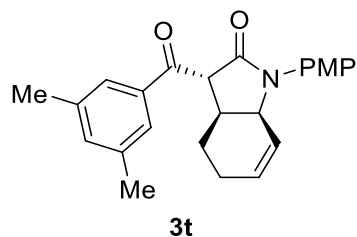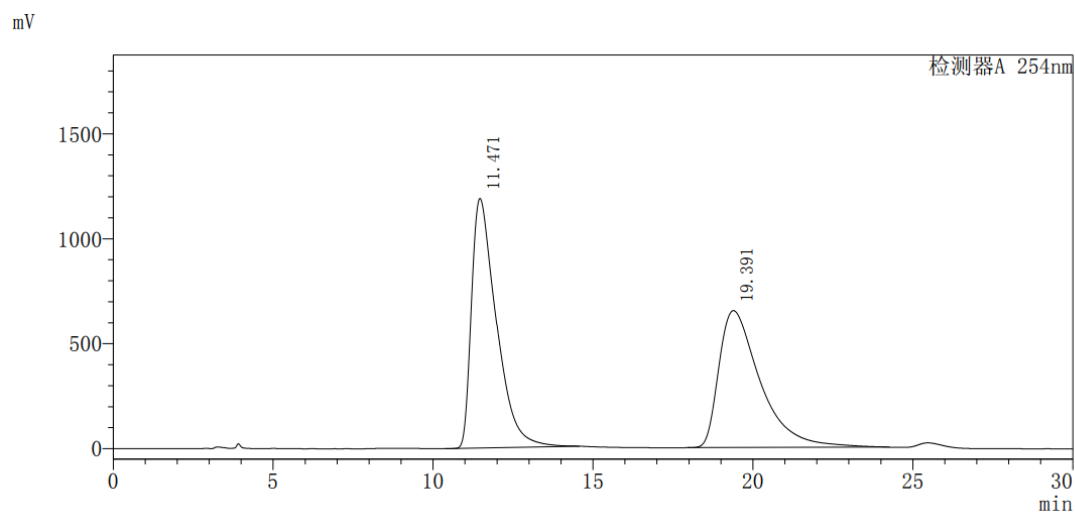

PDA Ch1 254nm

| Peak # | Ret. Time | Area      | Conc % |
|--------|-----------|-----------|--------|
| 1      | 11.471    | 64143345  | 52.086 |
| 2      | 19.391    | 59005568  | 47.914 |
| Total  |           | 123148913 | 100.0  |

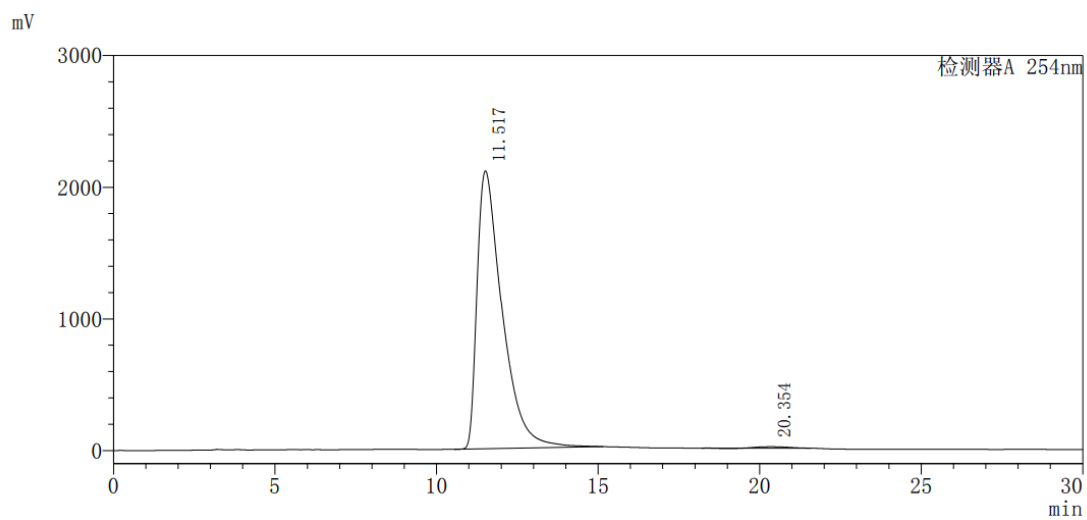

PDA Ch1 254nm

| Peak # | Ret. Time | Area      | Conc % | Ee % |
|--------|-----------|-----------|--------|------|
| 1      | 11.517    | 114098724 | 99.378 | 99   |
| 2      | 20.354    | 713900    | 0.622  |      |
| Total  |           | 114812625 | 100.0  |      |

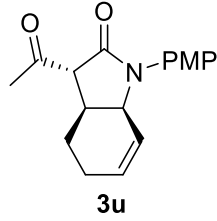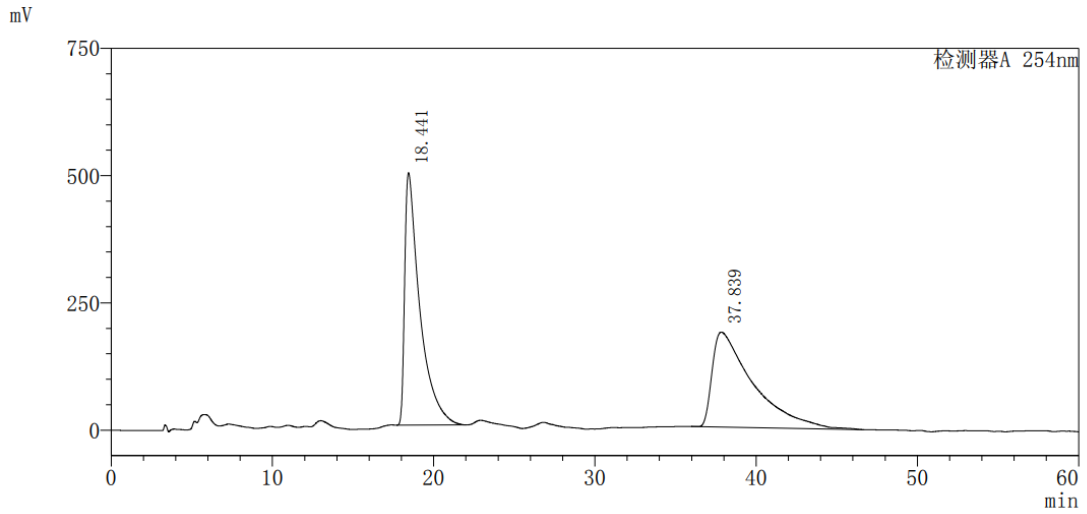

PDA Ch1 254nm

| Peak # | Ret. Time | Area     | Conc % |
|--------|-----------|----------|--------|
| 1      | 18.441    | 32364515 | 49.599 |
| 2      | 37.839    | 32887450 | 50.401 |
| Total  |           | 65251965 | 100.0  |

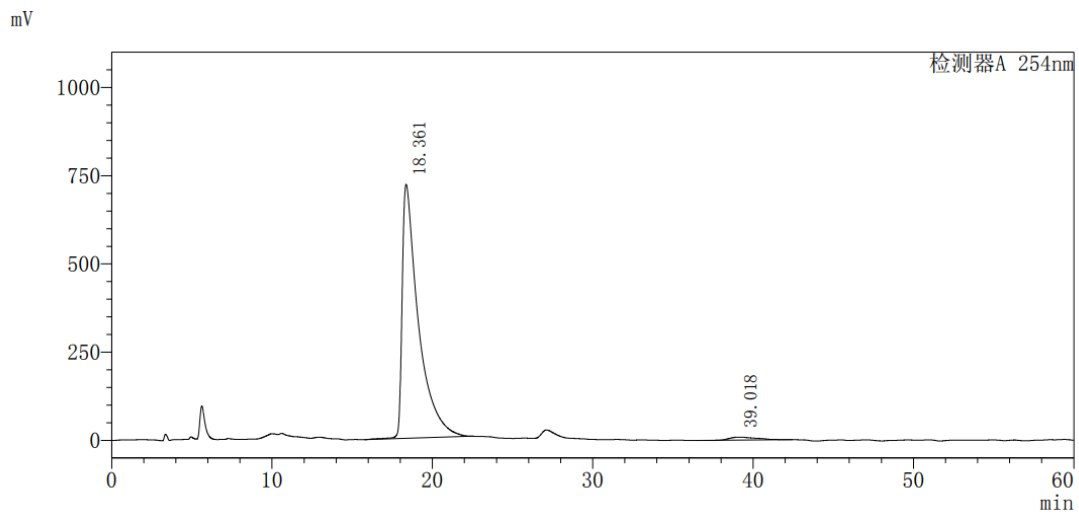

PDA Ch1 254nm

| Peak # | Ret. Time | Area     | Conc % | Ee % |
|--------|-----------|----------|--------|------|
| 1      | 18.361    | 50608044 | 97.915 | 96   |
| 2      | 39.018    | 1077534  | 2.085  |      |
| Total  |           | 51685578 | 100.0  |      |

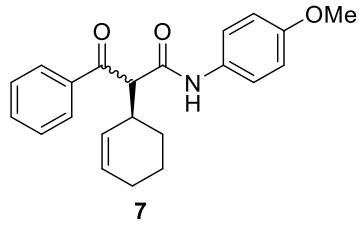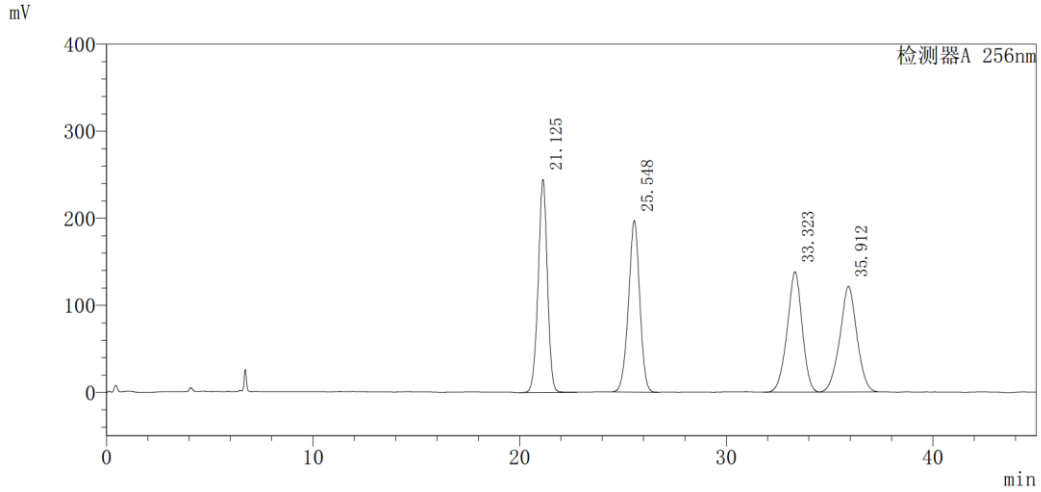

PDA Ch1 254nm

| Peak # | Ret. Time | Area     | Conc % |
|--------|-----------|----------|--------|
| 1      | 21.125    | 7537064  | 25.978 |
| 2      | 25.548    | 7522768  | 25.929 |
| 3      | 33.323    | 6973610  | 24.036 |
| 4      | 35.912    | 6979677  | 24.057 |
| Total  |           | 29013120 | 100.0  |

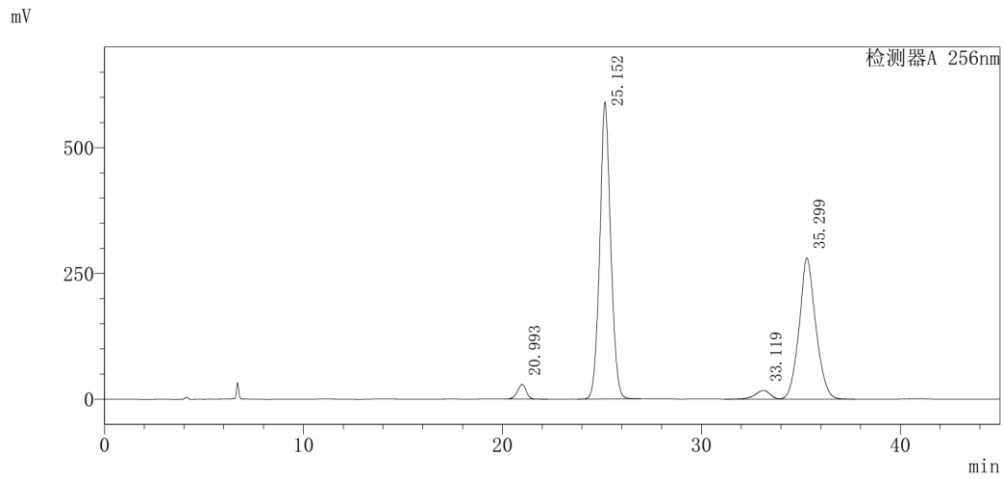

PDA Ch1 254nm

| Peak # | Ret. Time | Area     | Conc % | Ee % |
|--------|-----------|----------|--------|------|
| 1      | 20.993    | 896641   | 2.200  | 96   |
| 2      | 25.152    | 22575071 | 55.379 |      |
| 3      | 33.119    | 927064   | 2.274  | 89   |
| 4      | 35.299    | 16365883 | 40.147 |      |
| Total  |           | 40764659 | 100.0  |      |



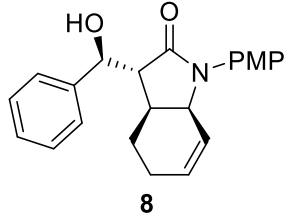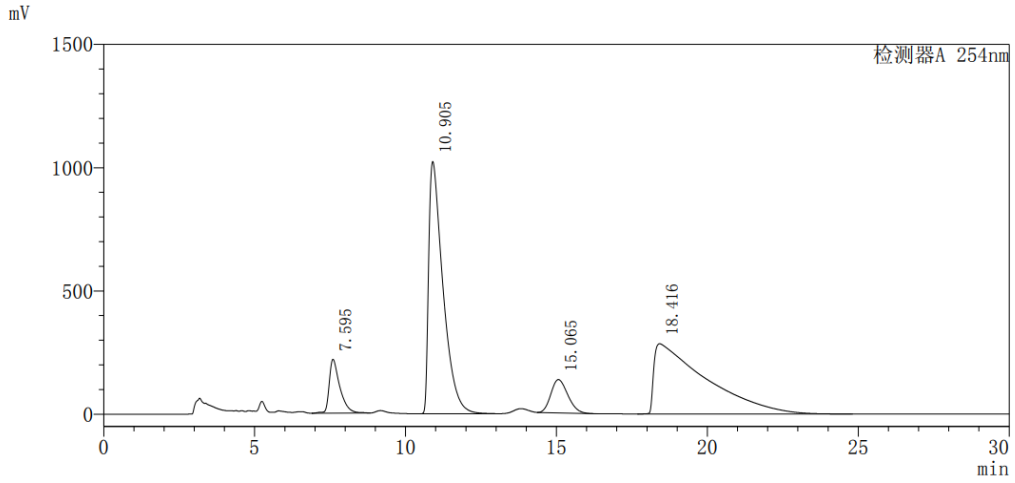

PDA Ch1 210nm

| Peak # | Ret. Time | Area     | Conc % |
|--------|-----------|----------|--------|
| 1      | 7.595     | 5372025  | 6.833  |
| 2      | 10.905    | 33786221 | 42.973 |
| 3      | 15.065    | 5290693  | 6.729  |
| 4      | 18.416    | 34173277 | 43.465 |
| Total  |           | 78622216 | 100.0  |

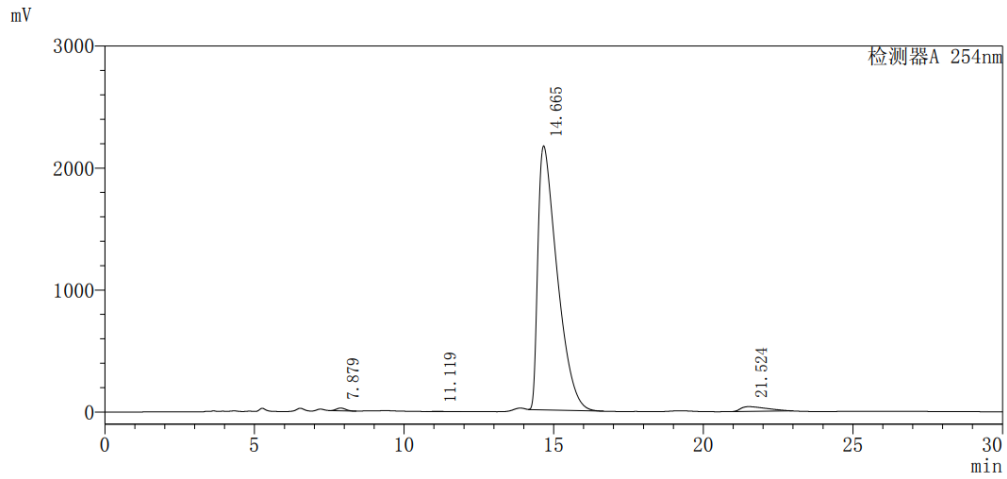

PDA Ch1 210nm

| Peak # | Ret. Time | Area     | Conc % | Ee % |
|--------|-----------|----------|--------|------|
| 1      | 7.879     | 480282   | 0.482  | 99   |
| 2      | 11.119    | 39354    | 0.040  |      |
| 3      | 14.665    | 96789268 | 97.153 |      |
| 4      | 21.524    | 2316615  | 2.325  |      |
| Total  |           | 99625520 | 100.0  |      |

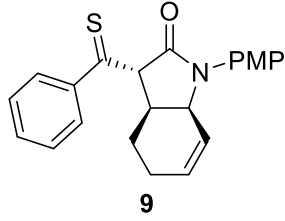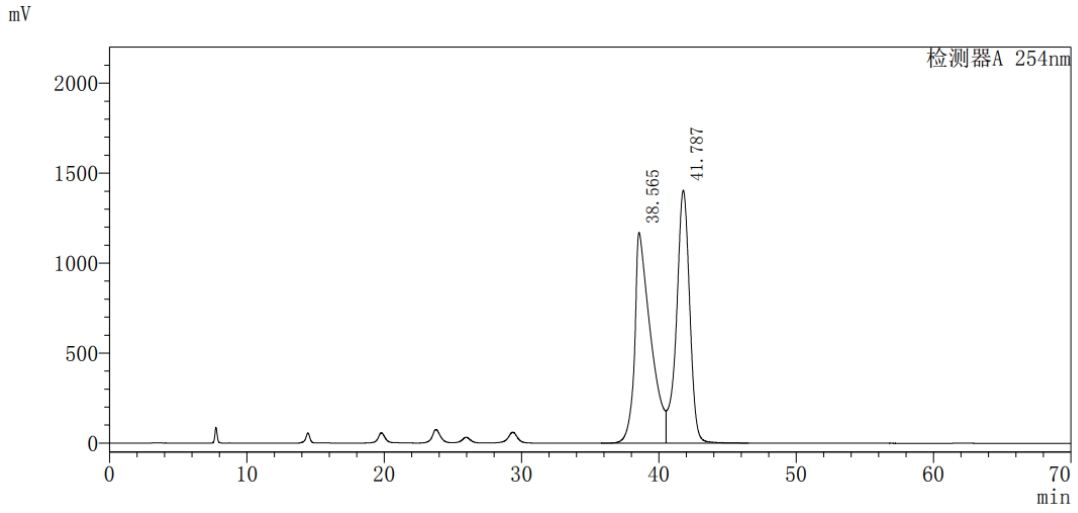

PDA Ch1 254nm

| Peak # | Ret. Time | Area      | Conc % |
|--------|-----------|-----------|--------|
| 1      | 38.565    | 94697259  | 50.093 |
| 2      | 41.787    | 94346451  | 49.907 |
| Total  |           | 189043710 | 100.0  |

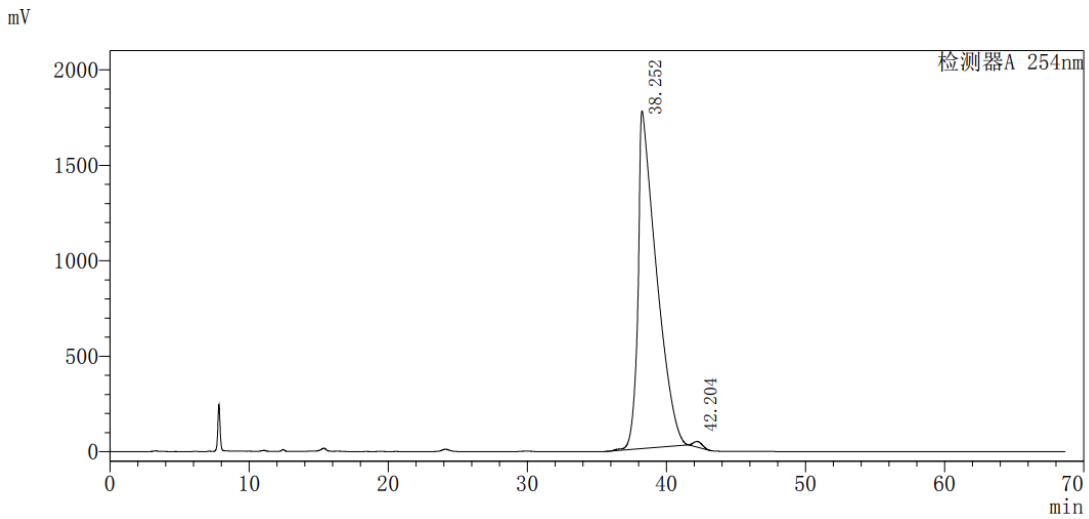

PDA Ch1 254nm

| Peak # | Ret. Time | Area      | Conc % | Ee % |
|--------|-----------|-----------|--------|------|
| 1      | 38.252    | 163214984 | 99.210 | 98   |
| 2      | 42.204    | 1300206   | 0.790  |      |
| Total  |           | 164515191 | 100.0  |      |

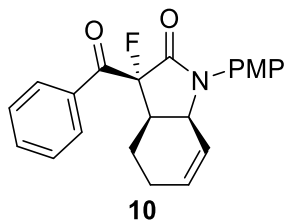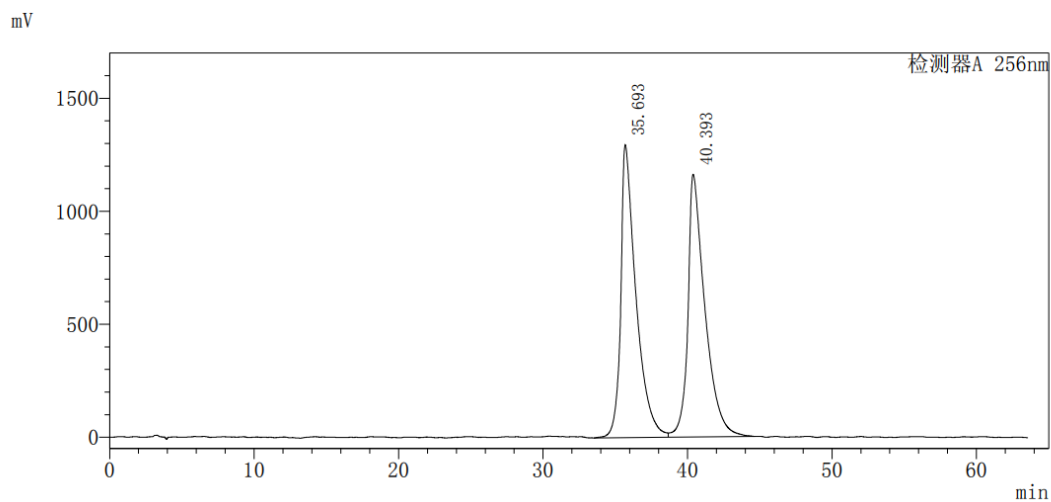

PDA Ch1 254nm

| Peak # | Ret. Time | Area      | Conc % |
|--------|-----------|-----------|--------|
| 1      | 35.693    | 95071838  | 49.948 |
| 2      | 40.393    | 95271497  | 50.052 |
| Total  |           | 190343335 | 100.0  |

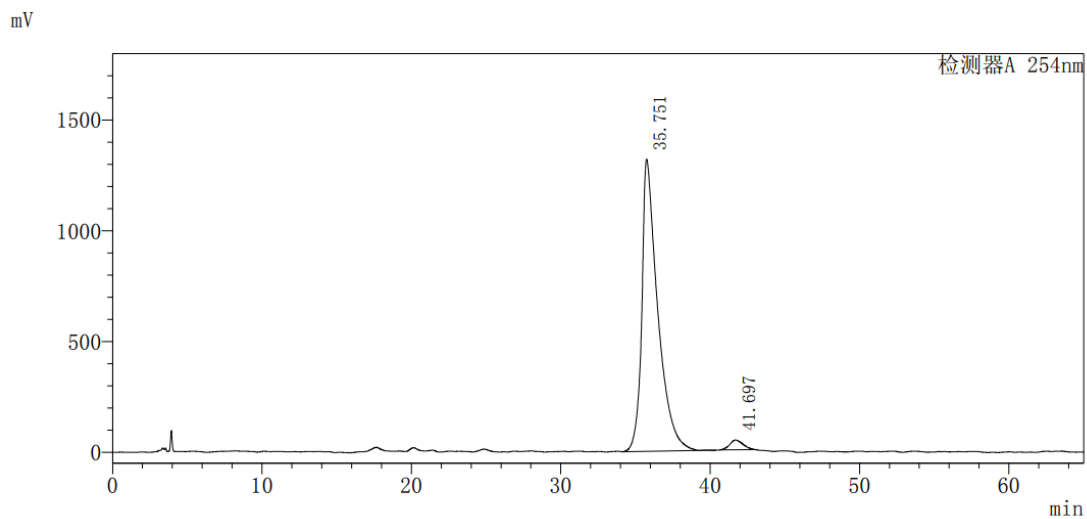

PDA Ch1 254nm

| Peak # | Ret. Time | Area      | Conc % | Ee % |
|--------|-----------|-----------|--------|------|
| 1      | 35.751    | 97921162  | 97.278 | 95   |
| 2      | 41.697    | 2740286   | 2.722  |      |
| Total  |           | 100661448 | 100.0  |      |

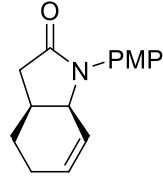

11

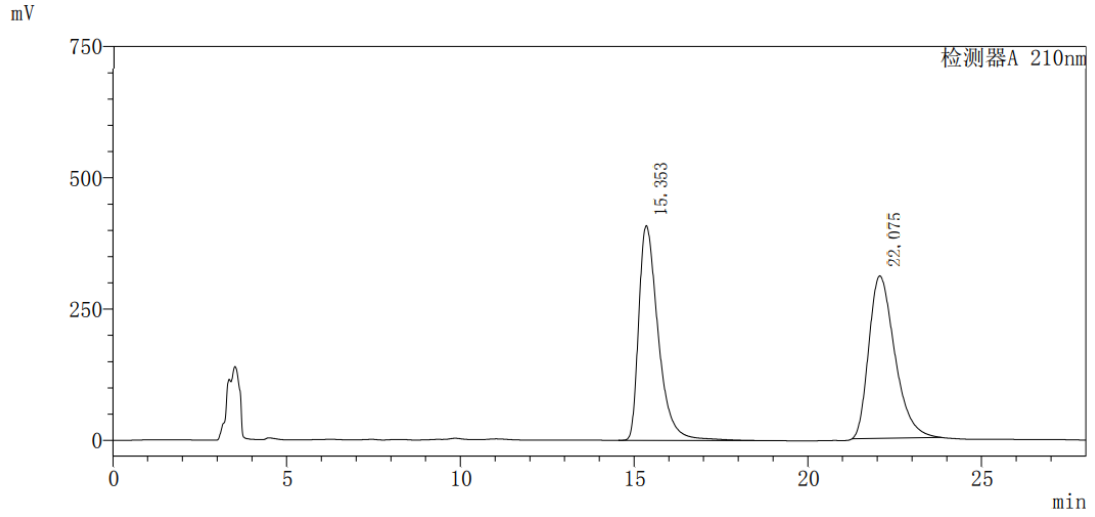

PDA Ch1 210nm

| Peak # | Ret. Time | Area     | Conc % |
|--------|-----------|----------|--------|
| 1      | 15.353    | 15975230 | 49.821 |
| 2      | 22.075    | 16089835 | 50.179 |
| Total  |           | 32065065 | 100.0  |

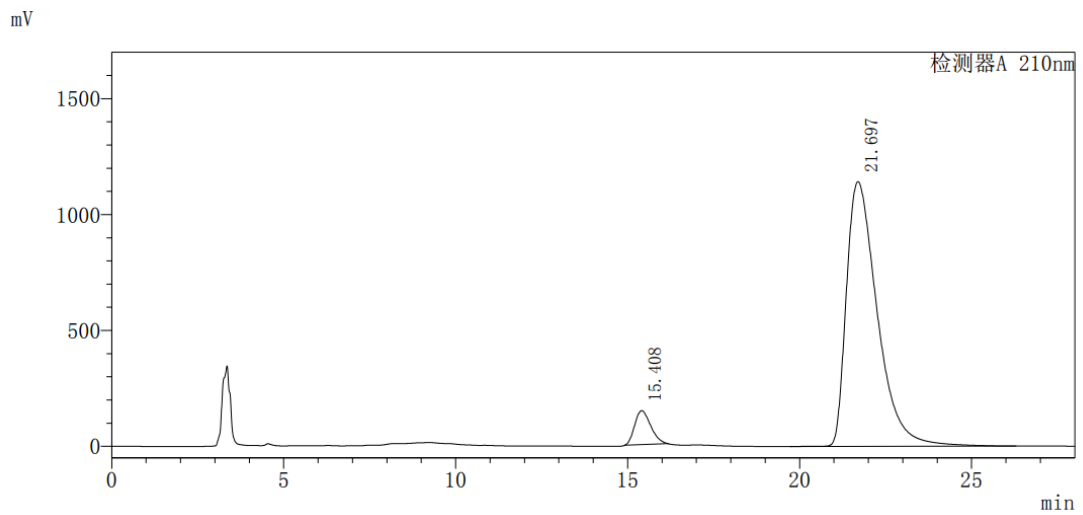

PDA Ch1 210nm

| Peak # | Ret. Time | Area     | Conc % | Ee % |
|--------|-----------|----------|--------|------|
| 1      | 15.408    | 4759066  | 6.250  | 88   |
| 2      | 21.697    | 71383838 | 93.750 |      |
| Total  |           | 76142904 | 100.0  |      |

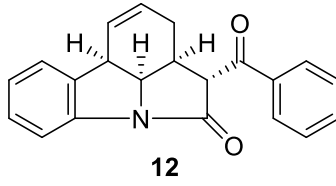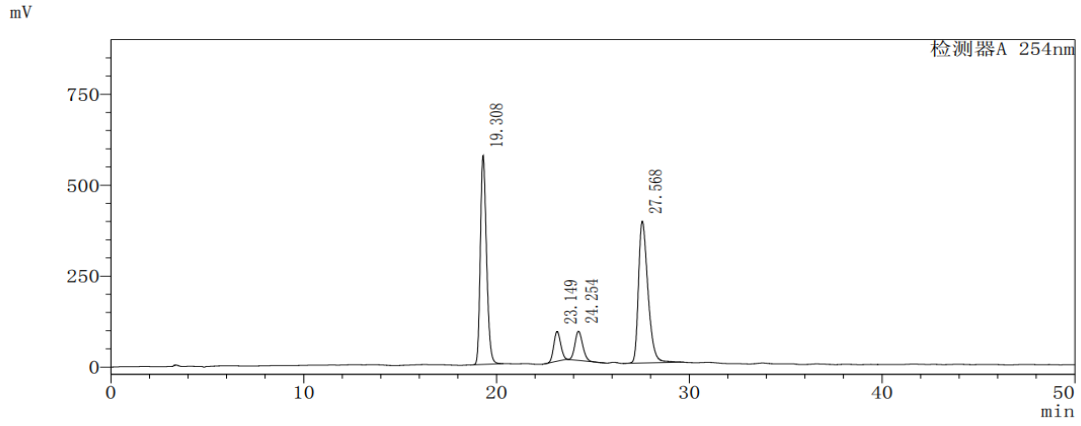

PDA Ch1 254nm

| Peak # | Ret. Time | Area     | Conc % |
|--------|-----------|----------|--------|
| 1      | 19.308    | 12804098 | 42.177 |
| 2      | 23.149    | 2010659  | 6.623  |
| 3      | 24.254    | 2221759  | 7.319  |
| 4      | 27.568    | 13321597 | 43.882 |
| Total  |           | 30358113 | 100.0  |

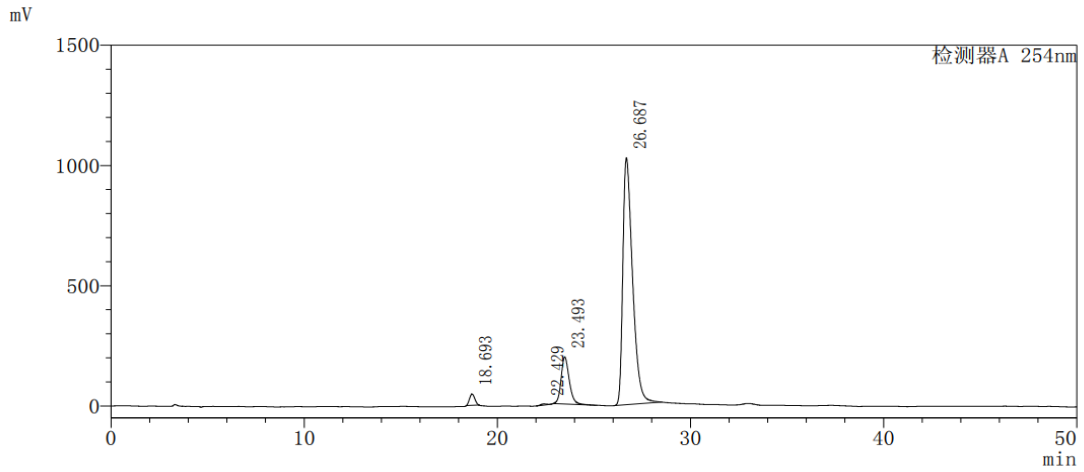

PDA Ch1 254nm

| Peak# | Ret. Time | Area     | Conc % | Ee % |
|-------|-----------|----------|--------|------|
| 1     | 18.693    | 887068   | 2.082  | 95   |
| 2     | 22.429    | 97797    | 0.230  |      |
| 3     | 23.493    | 5721941  | 13.429 |      |
| 4     | 26.687    | 35902226 | 84.260 |      |
| Total |           | 42609032 | 100.0  |      |

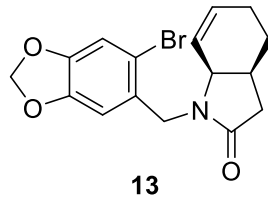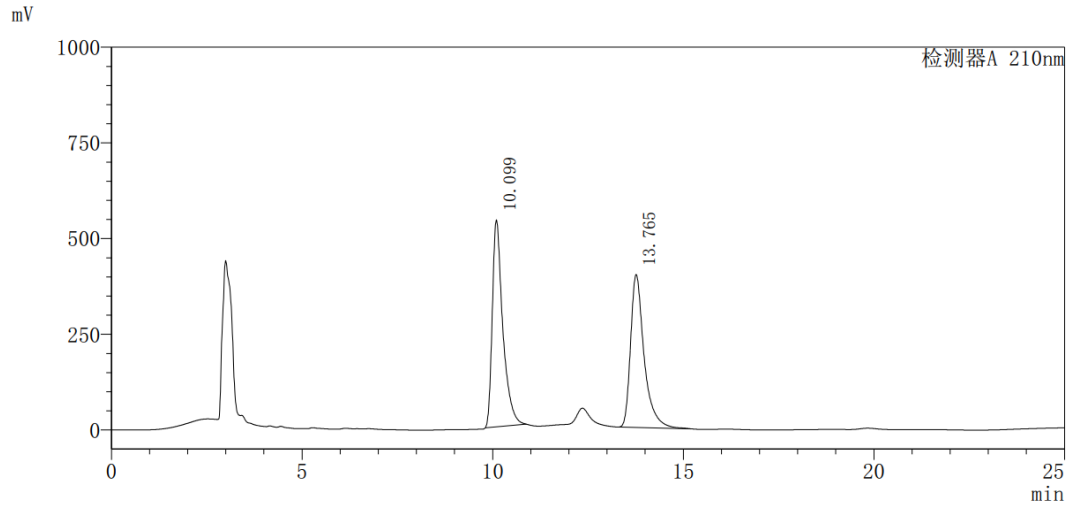

PDA Ch1 210nm

| Peak # | Ret. Time | Area     | Conc % |
|--------|-----------|----------|--------|
| 1      | 10.099    | 10338096 | 51.154 |
| 2      | 13.765    | 9865300  | 48.846 |
| Total  |           | 20203396 | 100.0  |

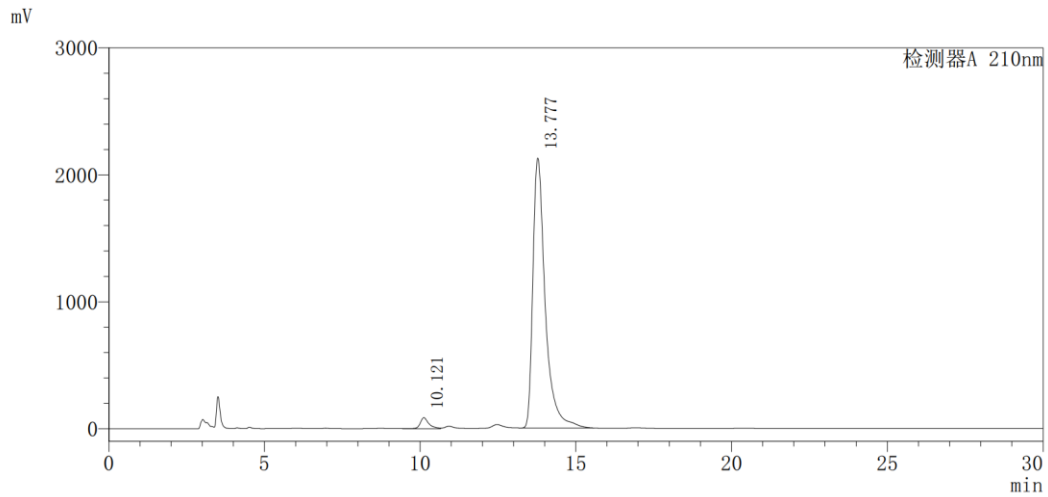

PDA Ch1 210nm

| Peak # | Ret. Time | Area     | Conc % | Ee % |
|--------|-----------|----------|--------|------|
| 1      | 10.121    | 1732402  | 2.864  | 94   |
| 2      | 13.777    | 58758609 | 97.136 |      |
| Total  |           | 60491011 | 100.0  |      |

## 8. X-Ray Crystal Structure Analysis

X-Ray crystallography data for **3r** (CDCC: 2224422): A colorless crystal suitable for X-ray crystallography was obtained from a *n*-hexane/dichloromethane solution at room temperature under air.

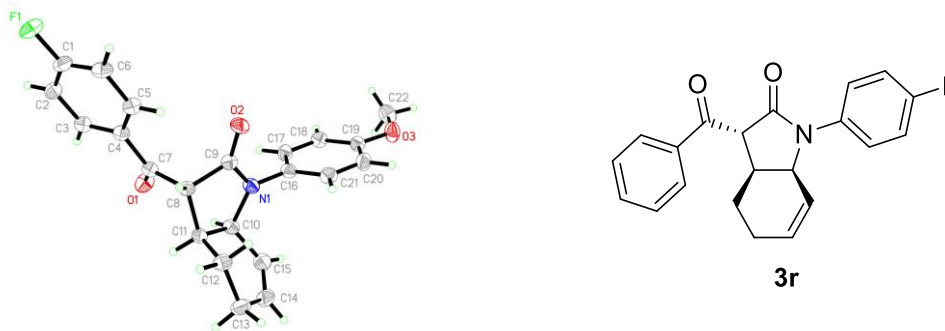

**Figure 1** The ORTEP drawing (50% probability for thermal ellipsoids) of **3r**

|                                                               |                |                    |                |
|---------------------------------------------------------------|----------------|--------------------|----------------|
| Bond precision:                                               | C-C = 0.0029 Å | Wavelength=1.54178 |                |
| Cell:                                                         | a=5.7149 (9)   | b=15.8503 (10)     | c=19.6731 (19) |
|                                                               | alpha=90       | beta=90            | gamma=90       |
| Temperature:                                                  | 173 K          |                    |                |
|                                                               | Calculated     | Reported           |                |
| Volume                                                        | 1782.1 (3)     | 1782.0 (3)         |                |
| Space group                                                   | P 21 21 21     | P 21 21 21         |                |
| Hall group                                                    | P 2ac 2ab      | P 2ac 2ab          |                |
| Moiety formula                                                | C22 H20 F N O3 | C22 H20 F N O3     |                |
| Sum formula                                                   | C22 H20 F N O3 | C22 H20 F N O3     |                |
| Mr                                                            | 365.39         | 365.39             |                |
| Dx, g cm <sup>-3</sup>                                        | 1.362          | 1.362              |                |
| Z                                                             | 4              | 4                  |                |
| Mu (mm <sup>-1</sup> )                                        | 0.802          | 0.802              |                |
| F000                                                          | 768.0          | 768.0              |                |
| F000'                                                         | 770.49         |                    |                |
| h, k, lmax                                                    | 6, 19, 23      | 6, 19, 23          |                |
| Nref                                                          | 3255 [ 1907]   | 3237               |                |
| Tmin, Tmax                                                    | 0.838, 0.866   | 0.574, 0.753       |                |
| Tmin'                                                         | 0.838          |                    |                |
| Correction method= # Reported T Limits: Tmin=0.574 Tmax=0.753 |                |                    |                |
| AbsCorr = MULTI-SCAN                                          |                |                    |                |
| Data completeness=                                            | 1.70/0.99      | Theta(max)= 68.203 |                |
| R(reflections)=                                               | 0.0339 ( 3130) | wR2(reflections)=  |                |
| S =                                                           | 1.059          | 0.0883 ( 3237)     |                |
|                                                               | Npar= 245      |                    |                |





## 9. Calculation Experiment

### 1. Computational Details

Density functional theory (DFT) calculations were performed using Gaussian 09<sup>1</sup> to investigate the mechanism of the reaction. Geometry optimizations and single-point energies were carried out at B3LYP-D3/6-31G(d,p) (SDD for Ru and Pd)<sup>2-9</sup> level of theory, and SMD<sup>10</sup> continuum model (THF) were used to introduce the solvent effects.

### Coordinates and Geometries of the optimized structures

**Table S1.** Energy of species involved in this work

| B3LYP-D3/6-31G(d,p) (SDD for Ru and Pd), THF, 298.15 K, G09 D.01 |                     |                   |
|------------------------------------------------------------------|---------------------|-------------------|
| Species                                                          | Single Point Energy | Gibbs Free Energy |
| II                                                               | -1246.085541        | -1245.725345      |
| II'                                                              | -1246.08539         | -1245.72637       |
| (S)-3a                                                           | -1016.979238        | -1016.67436       |
| (R)-3a                                                           | -1016.985007        | -1016.681401      |
| IM-I'                                                            | -4208.593344        | -4207.469439      |
| IM-I                                                             | -4208.594313        | -4207.468941      |
| TS-I'                                                            | -4208.571286        | -4207.448041      |
| TS-I                                                             | -4208.581086        | -4207.458213      |
| IM-II'                                                           | -4208.621655        | -4207.495517      |
| IM-II                                                            | -4208.627615        | -4207.502532      |
| PdL+                                                             | -3191.602841        | -3190.806561      |

### II

0 1

|   |             |            |             |
|---|-------------|------------|-------------|
| C | -2.13245000 | 4.85549400 | -0.71057300 |
| C | -2.45153800 | 3.55155900 | -1.09498800 |
| C | -1.62037200 | 2.49162500 | -0.73497200 |
| C | -0.46423400 | 2.72797300 | 0.02880400  |
| C | -0.16032400 | 4.04419000 | 0.42311600  |
| C | -0.98331900 | 5.10059400 | 0.04917200  |
| H | -2.77757400 | 5.67989900 | -1.00024900 |
| H | -3.34783300 | 3.35750900 | -1.67607900 |
| H | -1.89590200 | 1.48528600 | -1.02705800 |
| H | 0.72995100  | 4.21817300 | 1.01770800  |
| H | -0.73405900 | 6.11417800 | 0.34851100  |
| C | 0.44933100  | 1.64069200 | 0.47686300  |

|   |             |             |             |
|---|-------------|-------------|-------------|
| C | 0.34284400  | 0.24154900  | -0.12811700 |
| H | -0.32784500 | 0.23797600  | -0.98419200 |
| O | 1.28875600  | 1.85467000  | 1.35387500  |
| C | 1.67700300  | -0.28919500 | -0.68792500 |
| O | 1.70306700  | -0.83534900 | -1.78825000 |
| N | 2.74071000  | -0.17577100 | 0.15894800  |
| C | 4.06482900  | -0.62328100 | -0.01303900 |
| C | 4.98961500  | -0.26884600 | 0.98476600  |
| C | 4.48864900  | -1.40455600 | -1.10049500 |
| C | 6.31468000  | -0.68652000 | 0.89733500  |
| H | 4.66168400  | 0.33495900  | 1.82748900  |
| C | 5.82106500  | -1.81503100 | -1.17267100 |
| H | 3.78136200  | -1.67544900 | -1.87094700 |
| C | 6.74085300  | -1.46364600 | -0.18334500 |
| H | 7.01501300  | -0.40261300 | 1.67766400  |
| H | 6.13832500  | -2.41855100 | -2.01866700 |
| H | 7.77435700  | -1.78943900 | -0.25203500 |
| H | 2.56426000  | 0.40216000  | 0.97829300  |
| C | -1.61357700 | -2.33780600 | -0.46421500 |
| C | -2.87004500 | -2.04452800 | 0.35115400  |
| C | -2.71761800 | -0.81661300 | 1.21157100  |
| C | -1.53945300 | -0.24946900 | 1.48568100  |
| C | -0.21728400 | -0.75604700 | 0.95588100  |
| C | -0.36549800 | -2.19097900 | 0.41415700  |
| H | -3.10679000 | -2.91058000 | 0.97934300  |
| H | -1.57333900 | -1.63505300 | -1.30323600 |
| H | -1.67627100 | -3.34364700 | -0.89001900 |
| H | -0.44284800 | -2.86967800 | 1.27251500  |
| H | 0.52263700  | -2.49075600 | -0.14742500 |
| O | -3.94843500 | -1.83418200 | -0.60576200 |
| H | -1.51222700 | 0.63688000  | 2.11625900  |
| H | -3.63272400 | -0.40080900 | 1.62785200  |
| C | -5.24762500 | -2.09297600 | -0.31895700 |
| O | -6.08080900 | -1.80623100 | -1.15288600 |
| C | -5.59045400 | -2.75023600 | 0.99909500  |
| H | -5.20674200 | -2.18512600 | 1.85292000  |
| H | -5.16420000 | -3.75804900 | 1.04732400  |
| H | -6.67559600 | -2.82038100 | 1.06920300  |
| H | 0.51028100  | -0.75144400 | 1.77657200  |

## II'

0 1

|   |             |            |            |
|---|-------------|------------|------------|
| C | -1.59827300 | 5.28055500 | 0.50473800 |
| C | -1.83630900 | 4.14277800 | 1.27786800 |

|   |             |             |             |
|---|-------------|-------------|-------------|
| C | -1.17242200 | 2.95005200  | 0.99291500  |
| C | -0.26519300 | 2.88284000  | -0.07864500 |
| C | -0.03787800 | 4.03561900  | -0.85438800 |
| C | -0.69541200 | 5.22497700  | -0.56291300 |
| H | -2.11435800 | 6.20887400  | 0.73199500  |
| H | -2.53846400 | 4.18205900  | 2.10494300  |
| H | -1.37612500 | 2.07985700  | 1.60526400  |
| H | 0.66078400  | 3.97685100  | -1.68173300 |
| H | -0.50823100 | 6.10920000  | -1.16473000 |
| C | 0.46006100  | 1.63952000  | -0.45986200 |
| C | 0.33456100  | 0.36965100  | 0.38187800  |
| H | -0.21989900 | 0.54971800  | 1.30029400  |
| O | 1.15272200  | 1.60994400  | -1.47932800 |
| C | 1.69576100  | -0.17774400 | 0.86016100  |
| O | 1.83563700  | -0.53906500 | 2.02614500  |
| N | 2.64240600  | -0.29100800 | -0.11585400 |
| C | 3.95027400  | -0.80632400 | -0.03016900 |
| C | 4.74845800  | -0.70851700 | -1.18335900 |
| C | 4.47514500  | -1.41279500 | 1.12278500  |
| C | 6.04848300  | -1.20626000 | -1.18438900 |
| H | 4.34225000  | -0.24006000 | -2.07660400 |
| C | 5.78087300  | -1.90645200 | 1.10470900  |
| H | 3.86540700  | -1.48691500 | 2.01151600  |
| C | 6.57514800  | -1.80949900 | -0.03891400 |
| H | 6.65048900  | -1.12137500 | -2.08458900 |
| H | 6.17724500  | -2.37278000 | 2.00247300  |
| H | 7.58937500  | -2.19717400 | -0.03910300 |
| H | 2.38774200  | 0.14380300  | -1.00005400 |
| C | -2.63911200 | -1.32421500 | -1.51433600 |
| C | -2.93008400 | -2.38872900 | -0.45641100 |
| C | -1.71189200 | -2.72313200 | 0.35976800  |
| C | -0.59681800 | -1.98668400 | 0.34809200  |
| C | -0.43324100 | -0.71440500 | -0.45016100 |
| C | -1.79760700 | -0.18818500 | -0.92885000 |
| H | -3.31191400 | -3.30041100 | -0.92406500 |
| H | -2.10048900 | -1.80198700 | -2.34233500 |
| H | -3.58123900 | -0.94091100 | -1.91865000 |
| H | -2.33311300 | 0.25319600  | -0.07997700 |
| H | -1.66099600 | 0.60205600  | -1.67317000 |
| O | -3.92448500 | -1.88525700 | 0.49491900  |
| H | 0.25000300  | -2.30675700 | 0.95041300  |
| H | -1.77240600 | -3.61417400 | 0.98005200  |
| C | -5.25858500 | -2.01934700 | 0.29750400  |
| O | -6.00670900 | -1.48010700 | 1.08626500  |

|   |             |             |             |
|---|-------------|-------------|-------------|
| C | -5.74870600 | -2.85384400 | -0.86443900 |
| H | -5.35380500 | -2.49766400 | -1.82000800 |
| H | -5.44166900 | -3.89817800 | -0.74396000 |
| H | -6.83709600 | -2.80308400 | -0.88134100 |
| H | 0.18895700  | -0.93037600 | -1.33116500 |

**(S)-3a**

0 1

|   |             |             |             |
|---|-------------|-------------|-------------|
| C | 5.72971300  | -0.70609700 | -0.01721700 |
| C | 4.98868400  | -0.40200600 | -1.16056300 |
| C | 3.59438600  | -0.39031800 | -1.10893000 |
| C | 2.92632600  | -0.68198100 | 0.09144200  |
| C | 3.68381700  | -0.98617000 | 1.23663600  |
| C | 5.07341400  | -0.99880400 | 1.18335800  |
| H | 6.81504600  | -0.71589500 | -0.05979800 |
| H | 5.49506300  | -0.17568700 | -2.09406600 |
| H | 3.03810500  | -0.15229700 | -2.00826800 |
| H | 3.15957600  | -1.20810300 | 2.15993200  |
| H | 5.64777500  | -1.23527100 | 2.07422400  |
| C | 1.43439700  | -0.67503700 | 0.22404700  |
| C | 0.57867100  | -0.30841800 | -0.99215300 |
| H | 1.04810300  | -0.70446100 | -1.89384400 |
| O | 0.90035400  | -0.95379400 | 1.28975700  |
| C | -0.79346200 | -0.96980500 | -0.84511400 |
| O | -1.01554900 | -2.16381900 | -0.98486800 |
| N | -1.71753200 | 0.00399300  | -0.54569700 |
| C | -3.07527700 | -0.25586100 | -0.22154000 |
| C | -3.42677000 | -1.39975600 | 0.51222000  |
| C | -4.07586700 | 0.64627700  | -0.61129600 |
| C | -4.76222100 | -1.63758700 | 0.83244700  |
| H | -2.65503800 | -2.09251800 | 0.82087900  |
| C | -5.40807000 | 0.40346900  | -0.27553900 |
| H | -3.81952900 | 1.53266200  | -1.18120800 |
| C | -5.75986100 | -0.74002800 | 0.44355800  |
| H | -5.02083900 | -2.52694700 | 1.40013800  |
| H | -6.17176900 | 1.11141600  | -0.58456300 |
| H | -6.79794900 | -0.92836900 | 0.70074000  |
| C | 1.38350700  | 2.43227800  | 0.79772600  |
| C | 0.07182600  | 2.30867700  | 1.52159100  |
| C | -1.04428400 | 1.83245200  | 0.96589000  |
| C | -1.13287600 | 1.36127200  | -0.46578000 |
| C | 0.23606800  | 1.20121900  | -1.16836400 |
| C | 1.24088700  | 2.27395800  | -0.72470100 |
| H | 2.08375500  | 1.69289000  | 1.20760200  |

|   |             |            |             |
|---|-------------|------------|-------------|
| H | 1.83842200  | 3.40630600 | 1.01815100  |
| H | 0.88638600  | 3.22626700 | -1.13734600 |
| H | 2.21777500  | 2.08300800 | -1.17947000 |
| H | -1.75805400 | 2.05317100 | -1.04026900 |
| H | -1.96180600 | 1.75725700 | 1.54542000  |
| H | 0.06331100  | 1.33196400 | -2.24133200 |
| H | 0.05791000  | 2.61116200 | 2.56754200  |

**(R)-3a**

0 1

|   |             |             |             |
|---|-------------|-------------|-------------|
| C | 5.20092200  | -1.87964600 | 0.82330700  |
| C | 3.97246200  | -1.80754700 | 1.48367500  |
| C | 2.91640500  | -1.08921000 | 0.92359400  |
| C | 3.08024000  | -0.44107300 | -0.31123000 |
| C | 4.31741900  | -0.52885300 | -0.97323800 |
| C | 5.37189200  | -1.23894300 | -0.40862200 |
| H | 6.02296300  | -2.43552700 | 1.26524000  |
| H | 3.83514500  | -2.31351300 | 2.43467400  |
| H | 1.96082700  | -1.06563900 | 1.43241500  |
| H | 4.43149600  | -0.02906500 | -1.92930400 |
| H | 6.32578700  | -1.29586300 | -0.92467900 |
| C | 1.99100900  | 0.34499300  | -0.96236300 |
| C | 0.71834400  | 0.65974200  | -0.17121700 |
| H | 0.98239800  | 0.83223600  | 0.87888200  |
| O | 2.11538700  | 0.76141200  | -2.10759300 |
| C | -0.28211200 | -0.50897900 | -0.16566100 |
| O | 0.00150900  | -1.69497900 | -0.05625100 |
| N | -1.54383800 | 0.02155400  | -0.28841500 |
| C | -2.74682200 | -0.73142100 | -0.19868000 |
| C | -2.84280100 | -1.84089800 | 0.65566500  |
| C | -3.86364300 | -0.34661600 | -0.95538300 |
| C | -4.03799000 | -2.55416400 | 0.73710600  |
| H | -1.98452500 | -2.14293200 | 1.24077400  |
| C | -5.05732500 | -1.06119500 | -0.85695500 |
| H | -3.80165500 | 0.50274000  | -1.62687800 |
| C | -5.15129400 | -2.16962000 | -0.01347700 |
| H | -4.09874300 | -3.41180400 | 1.40104200  |
| H | -5.91331500 | -0.75060900 | -1.44905200 |
| H | -6.08073700 | -2.72637700 | 0.05900300  |
| C | 0.17068800  | 3.44050300  | 1.22774700  |
| C | -1.15061500 | 2.91304400  | 1.72183700  |
| C | -1.91766000 | 2.06466400  | 1.03020500  |
| C | -1.53869200 | 1.50598400  | -0.32253200 |
| C | -0.09143800 | 1.83300600  | -0.73814900 |

|   |             |            |             |
|---|-------------|------------|-------------|
| C | 0.34715400  | 3.22688200 | -0.28268300 |
| H | 0.98235800  | 2.94967000 | 1.78524000  |
| H | 0.25936600  | 4.50704300 | 1.46845500  |
| H | -0.26053400 | 3.96648300 | -0.81849800 |
| H | 1.38770100  | 3.39855500 | -0.57828900 |
| H | -2.24434700 | 1.85182600 | -1.08305200 |
| H | -2.86466500 | 1.71829500 | 1.43914200  |
| H | -0.02360700 | 1.77165800 | -1.82770900 |
| H | -1.48108000 | 3.24655900 | 2.70456900  |

**IM-I'**

1 1

|   |            |             |             |
|---|------------|-------------|-------------|
| C | 5.36743400 | 3.76339900  | -2.70936700 |
| C | 5.37777200 | 4.01149800  | -1.18417300 |
| C | 5.67067900 | 5.06342500  | -3.46396900 |
| C | 4.20788100 | 4.86067500  | -0.64554200 |
| H | 6.33834400 | 4.45361100  | -0.90862800 |
| N | 5.21652500 | 2.73647000  | -0.43454500 |
| H | 6.61009700 | 5.51448000  | -3.12441100 |
| H | 5.75829400 | 4.86999300  | -4.53787900 |
| H | 4.87358300 | 5.80418600  | -3.32978400 |
| O | 3.35290000 | 3.89013000  | 0.03431300  |
| H | 3.60591300 | 5.34770200  | -1.41294500 |
| H | 4.52321700 | 5.59791700  | 0.09680400  |
| C | 4.05809100 | 2.75326800  | 0.14375000  |
| C | 3.39651100 | 1.68695900  | 0.88776100  |
| C | 3.82820000 | 0.31194300  | 1.07756200  |
| C | 2.12193800 | 1.84319000  | 1.53321100  |
| C | 2.80902700 | -0.34675400 | 1.84574900  |
| P | 5.43001900 | -0.38055000 | 0.56965800  |
| C | 1.76976600 | 0.59420500  | 2.11995100  |
| H | 1.53981400 | 2.75282400  | 1.55717500  |
| H | 2.83189600 | -1.37804900 | 2.16918200  |
| C | 5.05563300 | -1.89012300 | -0.39124100 |
| C | 6.18229100 | -0.95019800 | 2.13928300  |
| H | 0.86192800 | 0.38900100  | 2.66966700  |
| C | 5.22105500 | -1.86379500 | -1.78432100 |
| C | 4.56998400 | -3.05094900 | 0.22810100  |
| C | 5.90636600 | -0.28370900 | 3.34353400  |
| C | 7.12970700 | -1.98716800 | 2.12334000  |
| C | 4.88453900 | -2.98061800 | -2.55170800 |
| H | 5.60907900 | -0.97034700 | -2.26569200 |
| C | 4.24021600 | -4.16668300 | -0.54212700 |
| H | 4.44953200 | -3.08673000 | 1.30528200  |

|    |             |             |             |
|----|-------------|-------------|-------------|
| C  | 6.56288200  | -0.65882400 | 4.51731500  |
| H  | 5.18039300  | 0.52312700  | 3.37167600  |
| C  | 7.78012500  | -2.35834800 | 3.30061000  |
| H  | 7.35234200  | -2.51123400 | 1.19870800  |
| C  | 4.39179800  | -4.13212500 | -1.93146600 |
| H  | 5.01315600  | -2.95319900 | -3.62969100 |
| H  | 3.86407700  | -5.06207800 | -0.05647400 |
| C  | 7.49895700  | -1.69565300 | 4.49862200  |
| H  | 6.33953800  | -0.14123300 | 5.44570200  |
| H  | 8.50565400  | -3.16641400 | 3.28132100  |
| H  | 4.13505700  | -5.00305500 | -2.52735700 |
| H  | 8.00707000  | -1.98655200 | 5.41330900  |
| H  | 6.18741400  | 3.06044600  | -2.90181300 |
| C  | 4.06624300  | 3.11160500  | -3.19164600 |
| H  | 3.87975800  | 2.16660000  | -2.67387100 |
| H  | 3.20220200  | 3.76640500  | -3.03088100 |
| H  | 4.11954700  | 2.90086200  | -4.26478200 |
| Pd | 6.70033200  | 1.22082500  | -0.49027800 |
| C  | 8.48988800  | 2.37510500  | -1.27387400 |
| C  | 8.59178500  | 1.02333400  | -1.61130400 |
| H  | 8.48037300  | 0.72594100  | -2.65313600 |
| C  | 8.48094600  | 0.03601100  | -0.59183300 |
| H  | 8.41437800  | -1.00953700 | -0.87990900 |
| H  | 8.91970400  | 0.21948200  | 0.38860900  |
| Ru | 1.97202900  | 0.31947200  | -0.08939000 |
| H  | 8.81973200  | 2.73287500  | -0.29941900 |
| H  | 8.39101000  | 3.12332500  | -2.05393300 |
| C  | -2.83658500 | 2.62966900  | 1.37637800  |
| C  | -2.80638200 | 2.26518300  | -0.12484000 |
| C  | -3.71943400 | 3.86268300  | 1.60202800  |
| C  | -2.07898000 | 3.27390500  | -1.03775400 |
| H  | -3.83452200 | 2.11361200  | -0.46652300 |
| N  | -2.02634300 | 1.01677500  | -0.34723900 |
| H  | -4.71498100 | 3.72640200  | 1.16793000  |
| H  | -3.84289500 | 4.05752200  | 2.67243600  |
| H  | -3.27658500 | 4.76100100  | 1.15487700  |
| O  | -0.82836300 | 2.60090300  | -1.39071600 |
| H  | -1.82093300 | 4.21970500  | -0.56076600 |
| H  | -2.62099800 | 3.46795200  | -1.96666600 |
| C  | -0.95322600 | 1.32091100  | -0.99725200 |
| C  | 0.17166100  | 0.45683900  | -1.35088700 |
| C  | 0.41112600  | -0.93226600 | -0.98960600 |
| C  | 1.29409500  | 0.90961100  | -2.12425800 |
| C  | 1.67678500  | -1.30226900 | -1.55965700 |

|    |              |             |             |
|----|--------------|-------------|-------------|
| P  | -0.75600800  | -2.02781700 | -0.11095500 |
| C  | 2.21187500   | -0.17290800 | -2.25045300 |
| H  | 1.41081700   | 1.90389800  | -2.53024300 |
| H  | 2.14145800   | -2.27545700 | -1.48456700 |
| C  | 0.17727300   | -2.71782100 | 1.30670900  |
| C  | -0.98302300  | -3.42610600 | -1.27481500 |
| H  | 3.15805500   | -0.14317500 | -2.77180000 |
| C  | -0.14243500  | -2.27216600 | 2.59797000  |
| C  | 1.21347000   | -3.64683300 | 1.13135800  |
| C  | -0.96318800  | -3.20905600 | -2.66155900 |
| C  | -1.31501300  | -4.69842200 | -0.78153000 |
| C  | 0.57891800   | -2.73629000 | 3.70015700  |
| H  | -0.95236600  | -1.56113800 | 2.73695600  |
| C  | 1.92612300   | -4.11486300 | 2.23571300  |
| H  | 1.46355600   | -4.00402600 | 0.13823300  |
| C  | -1.25456700  | -4.25461500 | -3.53979300 |
| H  | -0.72109400  | -2.22846200 | -3.06058100 |
| C  | -1.60308000  | -5.74012800 | -1.66430600 |
| H  | -1.34394900  | -4.87943900 | 0.28871300  |
| C  | 1.61370800   | -3.65803500 | 3.51995200  |
| H  | 0.32718000   | -2.38514500 | 4.69656400  |
| H  | 2.72610000   | -4.83514600 | 2.09257500  |
| C  | -1.57316200  | -5.52141500 | -3.04418100 |
| H  | -1.23228000  | -4.07687300 | -4.61106600 |
| H  | -1.85295100  | -6.72179500 | -1.27243000 |
| H  | 2.17006300   | -4.02533400 | 4.37741400  |
| H  | -1.79911400  | -6.33335400 | -3.72905300 |
| H  | -3.31066600  | 1.77635900  | 1.87770100  |
| C  | -1.43473300  | 2.80317300  | 1.97285000  |
| H  | -0.83009300  | 1.90386000  | 1.82461300  |
| H  | -0.90466200  | 3.65159900  | 1.52366500  |
| H  | -1.49751300  | 2.99265100  | 3.04970900  |
| Pd | -2.69860400  | -0.88451800 | 0.36046300  |
| C  | -11.97524400 | -0.97246500 | -1.46202800 |
| C  | -11.11570300 | 0.00844900  | -1.96513900 |
| C  | -9.76866300  | 0.01427400  | -1.60368200 |
| C  | -9.26322200  | -0.96242300 | -0.73035300 |
| C  | -10.13604700 | -1.94127200 | -0.22952200 |
| C  | -11.48147100 | -1.94884800 | -0.59171000 |
| H  | -13.02421000 | -0.97456200 | -1.74550000 |
| H  | -11.49622300 | 0.77337400  | -2.63616800 |
| H  | -9.12098900  | 0.79303300  | -1.98941000 |
| H  | -9.73747900  | -2.69146700 | 0.44567700  |
| H  | -12.14535900 | -2.71319900 | -0.19708000 |



|   |             |             |             |
|---|-------------|-------------|-------------|
| C | -7.81842400 | -1.02574200 | -0.31777900 |
| C | -6.81645700 | -0.11962800 | -1.01061800 |
| H | -7.02418000 | -0.13507100 | -2.08815000 |
| O | -7.46258900 | -1.85489200 | 0.51711600  |
| C | -6.91651300 | 1.36969600  | -0.55317800 |
| O | -6.18414800 | 2.18623600  | -1.17016900 |
| N | -7.71788400 | 1.53084900  | 0.49738900  |
| C | -7.91090200 | 2.76751300  | 1.10334100  |
| C | -8.63409900 | 2.75297700  | 2.32319000  |
| C | -7.47972200 | 4.03646400  | 0.63164200  |
| C | -8.90337500 | 3.91822500  | 3.03436800  |
| H | -8.97839600 | 1.78901900  | 2.69025100  |
| C | -7.75809500 | 5.20091500  | 1.35135200  |
| H | -6.92630900 | 4.07863600  | -0.29654500 |
| C | -8.46495200 | 5.15974500  | 2.55616100  |
| H | -9.45995700 | 3.86015700  | 3.96738900  |
| H | -7.41287300 | 6.15680500  | 0.96140600  |
| H | -8.67308600 | 6.07179400  | 3.10918400  |
| C | -4.68032100 | -3.07083900 | -0.37403700 |
| C | -4.00685500 | -2.55746100 | 0.88679000  |
| C | -4.50624300 | -1.36225300 | 1.46986000  |
| C | -4.87616000 | -0.34209800 | 0.58967000  |
| C | -5.33814900 | -0.56442600 | -0.83940400 |
| C | -4.99257300 | -1.97088400 | -1.41022600 |
| H | -5.61312400 | -3.54463600 | -0.04278600 |
| H | -4.06702900 | -3.84941000 | -0.83799100 |
| H | -4.11310900 | -1.86234600 | -2.05572600 |
| H | -5.80708400 | -2.31137600 | -2.05832000 |
| H | -5.11617400 | 0.62790100  | 1.01333100  |
| H | -4.39212800 | -1.15611100 | 2.53181400  |
| H | -4.80899400 | 0.17613300  | -1.44856300 |
| H | -3.59189500 | -3.31352400 | 1.55036000  |

## IM-I

11

|   |            |            |             |
|---|------------|------------|-------------|
| C | 5.23751400 | 3.69746600 | -2.92462300 |
| C | 5.28266200 | 4.02772400 | -1.41498100 |
| C | 5.49025400 | 4.96050300 | -3.75675400 |
| C | 4.11184500 | 4.88353600 | -0.89194700 |
| H | 6.24126100 | 4.50027400 | -1.18763800 |
| N | 5.15990300 | 2.79127200 | -0.59574500 |
| H | 6.42626700 | 5.45204900 | -3.46799800 |
| H | 5.55540200 | 4.70975400 | -4.82036600 |
| H | 4.67892400 | 5.68903800 | -3.64256500 |

|    |            |             |             |
|----|------------|-------------|-------------|
| O  | 3.27584200 | 3.92797200  | -0.16777400 |
| H  | 3.49576600 | 5.33844700  | -1.66738300 |
| H  | 4.42988900 | 5.64807800  | -0.17870700 |
| C  | 4.00343800 | 2.81083900  | -0.01323000 |
| C  | 3.36462300 | 1.76511900  | 0.77710000  |
| C  | 3.82590400 | 0.41073500  | 1.03196900  |
| C  | 2.09385000 | 1.92830200  | 1.42564100  |
| C  | 2.82657000 | -0.22724900 | 1.84263900  |
| P  | 5.43464000 | -0.27750900 | 0.53598800  |
| C  | 1.76954000 | 0.70532000  | 2.07865200  |
| H  | 1.50034200 | 2.83086100  | 1.41482500  |
| H  | 2.87453400 | -1.24134500 | 2.21400300  |
| C  | 5.08482200 | -1.82924000 | -0.36631900 |
| C  | 6.20829800 | -0.78521300 | 2.11664300  |
| H  | 0.87100400 | 0.51085000  | 2.64725100  |
| C  | 5.25734300 | -1.85705000 | -1.75845900 |
| C  | 4.61778500 | -2.97345600 | 0.29714600  |
| C  | 5.93368100 | -0.08937700 | 3.30427700  |
| C  | 7.16946800 | -1.80980700 | 2.12144600  |
| C  | 4.94956600 | -3.01159200 | -2.48086700 |
| H  | 5.62603600 | -0.97579400 | -2.27611400 |
| C  | 4.31850600 | -4.12756900 | -0.42773800 |
| H  | 4.48671100 | -2.96669600 | 1.37358800  |
| C  | 6.60425000 | -0.42413100 | 4.48245100  |
| H  | 5.19796100 | 0.70895000  | 3.31710900  |
| C  | 7.83450600 | -2.14002500 | 3.30256600  |
| H  | 7.39028800 | -2.35674800 | 1.20977300  |
| C  | 4.47983100 | -4.14765300 | -1.81630700 |
| H  | 5.08324500 | -3.02494200 | -3.55849200 |
| H  | 3.95818700 | -5.01041900 | 0.09184300  |
| C  | 7.55359400 | -1.44894200 | 4.48450000  |
| H  | 6.38113000 | 0.11534600  | 5.39834500  |
| H  | 8.57052900 | -2.93877600 | 3.29899400  |
| H  | 4.24658500 | -5.04791300 | -2.37725300 |
| H  | 8.07234600 | -1.70830200 | 5.40270600  |
| H  | 6.06666400 | 3.00151300  | -3.10370700 |
| C  | 3.93908500 | 2.99217200  | -3.33557200 |
| H  | 3.79555700 | 2.06642200  | -2.77102400 |
| H  | 3.06204300 | 3.63004100  | -3.17705400 |
| H  | 3.96598800 | 2.73480200  | -4.39946600 |
| Pd | 6.66797500 | 1.30079200  | -0.60206800 |
| C  | 8.42050600 | 2.45446000  | -1.45880800 |
| C  | 8.54743300 | 1.09136900  | -1.73920900 |
| H  | 8.42759900 | 0.74784400  | -2.76583800 |

|    |             |             |             |
|----|-------------|-------------|-------------|
| C  | 8.46967500  | 0.14557500  | -0.67806300 |
| H  | 8.41988300  | -0.91214000 | -0.92187900 |
| H  | 8.91671400  | 0.37822600  | 0.28814600  |
| Ru | 1.96025000  | 0.30895400  | -0.11137900 |
| H  | 8.75738200  | 2.86224400  | -0.50677700 |
| H  | 8.29103700  | 3.16481000  | -2.26922100 |
| C  | -2.86498500 | 2.72619500  | 1.12592400  |
| C  | -2.87232000 | 2.13832800  | -0.30295500 |
| C  | -3.87086800 | 3.88025900  | 1.21860700  |
| C  | -2.22765700 | 3.02892000  | -1.38319400 |
| H  | -3.90396700 | 1.89310300  | -0.56836400 |
| N  | -2.04141800 | 0.90391200  | -0.37573500 |
| H  | -4.86614000 | 3.55273200  | 0.90055200  |
| H  | -3.94198300 | 4.24767900  | 2.24783400  |
| H  | -3.57080600 | 4.72672000  | 0.58806900  |
| O  | -0.94296000 | 2.38172600  | -1.65607600 |
| H  | -2.02098800 | 4.05209800  | -1.06921100 |
| H  | -2.79430300 | 3.03724200  | -2.31783500 |
| C  | -0.99929500 | 1.16192600  | -1.09330100 |
| C  | 0.15010800  | 0.30280900  | -1.37148200 |
| C  | 0.42743200  | -1.04434700 | -0.89684400 |
| C  | 1.25435100  | 0.71642100  | -2.18971600 |
| C  | 1.69966000  | -1.42756200 | -1.44447700 |
| P  | -0.70866400 | -2.08828900 | 0.07877100  |
| C  | 2.20150000  | -0.34570900 | -2.23110700 |
| H  | 1.33997900  | 1.67305700  | -2.68447600 |
| H  | 2.18904500  | -2.37912500 | -1.29182800 |
| C  | 0.27933000  | -2.73070500 | 1.48086800  |
| C  | -1.00706800 | -3.52771400 | -1.01648600 |
| H  | 3.14296200  | -0.33663100 | -2.76087400 |
| C  | 0.02543900  | -2.22442000 | 2.76474800  |
| C  | 1.29727600  | -3.67870300 | 1.30002800  |
| C  | -1.02204800 | -3.37042300 | -2.41120600 |
| C  | -1.35314900 | -4.76920600 | -0.45871500 |
| C  | 0.79391400  | -2.64601700 | 3.85177900  |
| H  | -0.77070200 | -1.49963100 | 2.91001200  |
| C  | 2.05838100  | -4.10297100 | 2.38986000  |
| H  | 1.49434100  | -4.08577800 | 0.31429400  |
| C  | -1.36341800 | -4.44521700 | -3.23442500 |
| H  | -0.76923100 | -2.41405400 | -2.85921600 |
| C  | -1.68993100 | -5.84061400 | -1.28699100 |
| H  | -1.35543300 | -4.90339100 | 0.61866900  |
| C  | 1.81220000  | -3.58478200 | 3.66489300  |
| H  | 0.59264900  | -2.24748600 | 4.84179300  |

|    |              |             |             |
|----|--------------|-------------|-------------|
| H  | 2.84495500   | -4.83699700 | 2.24275200  |
| C  | -1.69600000  | -5.68151100 | -2.67540400 |
| H  | -1.36840200  | -4.31398000 | -4.31252100 |
| H  | -1.94980000  | -6.79851600 | -0.84595200 |
| H  | 2.40636800   | -3.91821900 | 4.51073100  |
| H  | -1.96030200  | -6.51631200 | -3.31779900 |
| H  | -3.21775200  | 1.92136000  | 1.78247900  |
| C  | -1.46246800  | 3.12324200  | 1.60026200  |
| H  | -0.77814800  | 2.27018700  | 1.56149500  |
| H  | -1.03756800  | 3.93113900  | 0.99308700  |
| H  | -1.49663200  | 3.47769100  | 2.63596900  |
| Pd | -2.62456700  | -0.91200900 | 0.58621100  |
| C  | -11.79909300 | -0.85566100 | -2.17440000 |
| C  | -11.26810900 | -0.58403200 | -0.91123800 |
| C  | -9.88782800  | -0.47109800 | -0.73503600 |
| C  | -9.02412900  | -0.62219600 | -1.83335100 |
| C  | -9.56860800  | -0.88535800 | -3.10235700 |
| C  | -10.94483000 | -1.00626000 | -3.27246900 |
| H  | -12.87401600 | -0.94669900 | -2.30515700 |
| H  | -11.93000200 | -0.45507800 | -0.05947900 |
| H  | -9.48754400  | -0.22712700 | 0.24439200  |
| H  | -8.89158700  | -0.99310900 | -3.94351100 |
| H  | -11.35432200 | -1.21531400 | -4.25690700 |
| C  | -7.53136500  | -0.51168300 | -1.71804100 |
| C  | -6.90347100  | -0.40029400 | -0.33328200 |
| H  | -7.41635400  | -1.06829800 | 0.36307300  |
| O  | -6.83662300  | -0.50650000 | -2.73003900 |
| C  | -7.07110900  | 1.07711200  | 0.17214600  |
| O  | -6.40921000  | 1.94753600  | -0.45164300 |
| N  | -7.84615800  | 1.17265000  | 1.24882900  |
| C  | -8.09800700  | 2.39589000  | 1.86608600  |
| C  | -8.72194700  | 2.33219200  | 3.13765700  |
| C  | -7.82669200  | 3.69157000  | 1.35267200  |
| C  | -9.03928800  | 3.47748400  | 3.86195900  |
| H  | -8.94845600  | 1.34652900  | 3.53769400  |
| C  | -8.15301400  | 4.83532000  | 2.08453200  |
| H  | -7.35927800  | 3.77450800  | 0.38127500  |
| C  | -8.75530800  | 4.74668900  | 3.34269900  |
| H  | -9.51454300  | 3.38153000  | 4.83594300  |
| H  | -7.93168100  | 5.81308000  | 1.66053800  |
| H  | -9.00117400  | 5.64349400  | 3.90504900  |
| C  | -4.63371500  | -3.15875600 | 0.26881600  |
| C  | -3.86860200  | -2.51629700 | 1.41260400  |
| C  | -4.32452700  | -1.26040800 | 1.89806300  |

|   |             |             |             |
|---|-------------|-------------|-------------|
| C | -4.77024800 | -0.34171200 | 0.93997200  |
| C | -5.39062300 | -0.72683400 | -0.39073100 |
| C | -5.03749600 | -2.17190600 | -0.84767900 |
| H | -5.52617900 | -3.62266100 | 0.71449000  |
| H | -4.04448300 | -3.97274200 | -0.16405400 |
| H | -4.19942900 | -2.10399800 | -1.55012100 |
| H | -5.86882700 | -2.59468300 | -1.41726400 |
| H | -4.95819100 | 0.67492400  | 1.26462300  |
| H | -4.11359800 | -0.93525200 | 2.91460000  |
| H | -5.00454300 | -0.03652100 | -1.14473600 |
| H | -3.39484900 | -3.19636600 | 2.11768400  |

**TS-I'**

1 1

|   |            |             |             |
|---|------------|-------------|-------------|
| C | 5.97299300 | 3.10216800  | -2.72787300 |
| C | 5.89326000 | 3.46476500  | -1.22759600 |
| C | 6.46310400 | 4.30599000  | -3.54207300 |
| C | 4.79505300 | 4.48163400  | -0.85357700 |
| H | 6.87452900 | 3.81619800  | -0.89942600 |
| N | 5.52030700 | 2.27945500  | -0.41011000 |
| H | 7.42272100 | 4.68040200  | -3.16726600 |
| H | 6.59734500 | 4.02948500  | -4.59280800 |
| H | 5.74464900 | 5.13321800  | -3.51051100 |
| O | 3.77866700 | 3.67290600  | -0.18440600 |
| H | 4.31808100 | 4.97226500  | -1.70257500 |
| H | 5.13845800 | 5.23398200  | -0.13936900 |
| C | 4.32949000 | 2.47317900  | 0.06039800  |
| C | 3.48840200 | 1.54712100  | 0.80793200  |
| C | 3.71684200 | 0.13684600  | 1.08045400  |
| C | 2.20908200 | 1.90141600  | 1.35786600  |
| C | 2.57100300 | -0.34166900 | 1.80428100  |
| P | 5.24324900 | -0.78478500 | 0.72840900  |
| C | 1.65536800 | 0.74189100  | 1.96971500  |
| H | 1.75439100 | 2.87980000  | 1.30574300  |
| H | 2.43092100 | -1.35062900 | 2.16518700  |
| C | 4.73538000 | -2.26834100 | -0.21225700 |
| C | 5.77231300 | -1.40011400 | 2.37205500  |
| H | 0.69794000 | 0.68665100  | 2.46795800  |
| C | 5.06094800 | -2.35326800 | -1.57417900 |
| C | 3.99436500 | -3.29606200 | 0.39065400  |
| C | 5.47519800 | -0.67680700 | 3.53769900  |
| C | 6.56550000 | -2.55607100 | 2.45775700  |
| C | 4.63456000 | -3.44748600 | -2.33001500 |
| H | 5.64144100 | -1.56241500 | -2.04164100 |

|    |             |             |             |
|----|-------------|-------------|-------------|
| C  | 3.57528700  | -4.38955600 | -0.36722600 |
| H  | 3.73841800  | -3.24304400 | 1.44362100  |
| C  | 5.95269100  | -1.11590700 | 4.77418500  |
| H  | 4.86732700  | 0.22123000  | 3.48773900  |
| C  | 7.03760300  | -2.99007700 | 3.69682100  |
| H  | 6.80463900  | -3.12366100 | 1.56340000  |
| C  | 3.89122600  | -4.46555600 | -1.72719700 |
| H  | 4.88716000  | -3.50626200 | -3.38460400 |
| H  | 2.99999400  | -5.18095800 | 0.10339700  |
| C  | 6.73180900  | -2.27242800 | 4.85655000  |
| H  | 5.71178600  | -0.55465100 | 5.67230400  |
| H  | 7.64190700  | -3.89056600 | 3.75555900  |
| H  | 3.56420300  | -5.31944700 | -2.31327100 |
| H  | 7.09850400  | -2.61390600 | 5.82002700  |
| H  | 6.72799500  | 2.30962900  | -2.80540700 |
| C  | 4.64988200  | 2.54523400  | -3.26615900 |
| H  | 4.32574400  | 1.67391300  | -2.69005900 |
| H  | 3.85175900  | 3.29575300  | -3.23270900 |
| H  | 4.76233000  | 2.23469500  | -4.31002000 |
| Pd | 6.79902000  | 0.59352100  | -0.26506300 |
| C  | 8.78151400  | 1.50175600  | -0.88871100 |
| C  | 8.75362400  | 0.13612700  | -1.18262900 |
| H  | 8.70865000  | -0.18045100 | -2.22376700 |
| C  | 8.42236700  | -0.79723000 | -0.15937200 |
| H  | 8.25815400  | -1.83611000 | -0.43227100 |
| H  | 8.78135200  | -0.63755800 | 0.85699400  |
| Ru | 1.95548900  | 0.32333300  | -0.20958800 |
| H  | 9.05353500  | 1.85437100  | 0.10518900  |
| H  | 8.84335200  | 2.22842600  | -1.69257100 |
| C  | -2.53869100 | 3.52517100  | 0.60330000  |
| C  | -2.42006800 | 2.99909200  | -0.84445800 |
| C  | -3.24642700 | 4.88565100  | 0.61753400  |
| C  | -1.46242100 | 3.79440100  | -1.75944700 |
| H  | -3.42291800 | 2.95643000  | -1.27776800 |
| N  | -1.84155900 | 1.63129700  | -0.87595800 |
| H  | -4.22080600 | 4.83604700  | 0.12020500  |
| H  | -3.41946500 | 5.21889500  | 1.64458900  |
| H  | -2.64850500 | 5.65612400  | 0.11570200  |
| O  | -0.32706100 | 2.89663200  | -1.95193700 |
| H  | -1.08063700 | 4.71866000  | -1.32402100 |
| H  | -1.88967000 | 4.00308100  | -2.74337900 |
| C  | -0.69155200 | 1.69723900  | -1.45449900 |
| C  | 0.29620100  | 0.63556000  | -1.63392600 |
| C  | 0.27687900  | -0.73562900 | -1.14349800 |

|    |              |             |             |
|----|--------------|-------------|-------------|
| C  | 1.52997700   | 0.83539600  | -2.34059800 |
| C  | 1.50532600   | -1.34596100 | -1.57365100 |
| P  | -1.11108700  | -1.54909200 | -0.26762700 |
| C  | 2.26845200   | -0.38146800 | -2.30071600 |
| H  | 1.83638500   | 1.75949300  | -2.80811500 |
| H  | 1.80235400   | -2.36806800 | -1.38350400 |
| C  | -0.34136800  | -2.35218000 | 1.19295300  |
| C  | -1.53407200  | -2.93762000 | -1.39234000 |
| H  | 3.24116700   | -0.54976500 | -2.73994500 |
| C  | -0.60290000  | -1.81225700 | 2.46158500  |
| C  | 0.51141500   | -3.46036400 | 1.07999900  |
| C  | -1.38306400  | -2.81179200 | -2.78260900 |
| C  | -2.13451900  | -4.09579700 | -0.87036700 |
| C  | -0.00343700  | -2.35826900 | 3.59872600  |
| H  | -1.27610900  | -0.96435100 | 2.55539800  |
| C  | 1.10321400   | -4.00888200 | 2.21851900  |
| H  | 0.71027100   | -3.89732000 | 0.10738000  |
| C  | -1.81226300  | -3.83345800 | -3.63229300 |
| H  | -0.92922600  | -1.92093600 | -3.20658700 |
| C  | -2.55982200  | -5.11463500 | -1.72376100 |
| H  | -2.26370000  | -4.20646200 | 0.20202000  |
| C  | 0.85159800   | -3.45676800 | 3.47825600  |
| H  | -0.21126500  | -1.93152300 | 4.57566500  |
| H  | 1.76126100   | -4.86744400 | 2.12302200  |
| C  | -2.39962500  | -4.98683600 | -3.10608300 |
| H  | -1.68439100  | -3.72742000 | -4.70584700 |
| H  | -3.01703800  | -6.00736600 | -1.30684800 |
| H  | 1.31229600   | -3.88781000 | 4.36241300  |
| H  | -2.73133200  | -5.78065900 | -3.76895200 |
| H  | -3.17749900  | 2.80734100  | 1.13136600  |
| C  | -1.18776900  | 3.56864200  | 1.32837200  |
| H  | -0.71035300  | 2.58386800  | 1.33658200  |
| H  | -0.49818100  | 4.28199400  | 0.86105500  |
| H  | -1.32533400  | 3.88354800  | 2.36821100  |
| Pd | -2.80609000  | -0.04493000 | 0.11213400  |
| C  | -10.18676300 | -4.33808900 | -1.11014900 |
| C  | -9.65264700  | -3.45315900 | -2.04845300 |
| C  | -8.96536400  | -2.31301900 | -1.62738500 |
| C  | -8.79638000  | -2.04656500 | -0.25830800 |
| C  | -9.33477100  | -2.95072100 | 0.67563300  |
| C  | -10.02690300 | -4.08250900 | 0.25644000  |
| H  | -10.72543800 | -5.22208500 | -1.44001800 |
| H  | -9.77168100  | -3.64763000 | -3.11050900 |
| H  | -8.55901700  | -1.64236400 | -2.37557900 |

|   |              |             |             |
|---|--------------|-------------|-------------|
| H | -9.19703300  | -2.74313500 | 1.73136400  |
| H | -10.44158200 | -4.76747100 | 0.99068600  |
| C | -8.03448000  | -0.86278700 | 0.28086500  |
| C | -7.53861500  | 0.21652000  | -0.68200100 |
| H | -7.99937800  | 0.06704500  | -1.65707200 |
| O | -7.82027300  | -0.78851200 | 1.48536600  |
| C | -7.98312300  | 1.62262500  | -0.20291600 |
| O | -8.94727200  | 2.17353000  | -0.76993400 |
| N | -7.20504200  | 2.04495900  | 0.79816600  |
| C | -7.14672800  | 3.34809700  | 1.25803800  |
| C | -6.34801300  | 3.58224600  | 2.40611600  |
| C | -7.74629200  | 4.47970700  | 0.64508700  |
| C | -6.15405500  | 4.86515300  | 2.91205500  |
| H | -5.89008500  | 2.72385200  | 2.89089900  |
| C | -7.54098800  | 5.76031500  | 1.15927400  |
| H | -8.37615900  | 4.32296300  | -0.22128400 |
| C | -6.74656400  | 5.97112100  | 2.29145500  |
| H | -5.53729900  | 5.00405100  | 3.79739200  |
| H | -8.01371700  | 6.60837200  | 0.66765200  |
| H | -6.59781600  | 6.97293900  | 2.68477300  |
| C | -5.08677800  | -2.00448800 | 0.14264600  |
| C | -4.31882900  | -1.15415400 | 1.13769900  |
| C | -4.63502800  | 0.23799100  | 1.26873000  |
| C | -5.25175400  | 0.93190500  | 0.21716100  |
| C | -5.98237500  | 0.19922900  | -0.90066000 |
| C | -5.42290400  | -1.22633600 | -1.14398600 |
| H | -5.99921900  | -2.36827800 | 0.62822200  |
| H | -4.50327000  | -2.89273800 | -0.12090100 |
| H | -4.50260000  | -1.13353100 | -1.73404400 |
| H | -6.13230600  | -1.79624600 | -1.75347200 |
| H | -5.07016900  | 1.98915800  | 0.11241100  |
| H | -4.30682900  | 0.79334300  | 2.14512600  |
| H | -5.82920200  | 0.77958500  | -1.81792400 |
| H | -3.96643600  | -1.67389000 | 2.02721100  |

## TS-I

11

|   |            |            |             |
|---|------------|------------|-------------|
| C | 5.79251200 | 3.09910200 | -3.02685900 |
| C | 5.79433800 | 3.52415500 | -1.54069800 |
| C | 6.20317100 | 4.27777200 | -3.91742400 |
| C | 4.69343100 | 4.52569400 | -1.13901700 |
| H | 6.78323200 | 3.91365700 | -1.28766800 |
| N | 5.50306900 | 2.36426900 | -0.65652700 |
| H | 7.17187300 | 4.69146900 | -3.61450300 |



|    |            |             |             |
|----|------------|-------------|-------------|
| H  | 6.28434400 | 3.95913200  | -4.96158000 |
| H  | 5.46429600 | 5.08664600  | -3.87868000 |
| O  | 3.72976900 | 3.71095600  | -0.40208800 |
| H  | 4.16600100 | 4.98549500  | -1.97480800 |
| H  | 5.05433900 | 5.30256500  | -0.46021900 |
| C  | 4.32849200 | 2.53798100  | -0.13937900 |
| C  | 3.54985600 | 1.61287500  | 0.67383600  |
| C  | 3.84084300 | 0.22386700  | 0.99349200  |
| C  | 2.28025000 | 1.94505900  | 1.25919000  |
| C  | 2.74052100 | -0.26382100 | 1.77909600  |
| P  | 5.38314700 | -0.65745100 | 0.60900200  |
| C  | 1.79337200 | 0.79376600  | 1.93997300  |
| H  | 1.79027700 | 2.90530400  | 1.19103400  |
| H  | 2.64765700 | -1.26362700 | 2.18033000  |
| C  | 4.88987200 | -2.20813400 | -0.22041600 |
| C  | 6.02839300 | -1.15719500 | 2.24985200  |
| H  | 0.85604300 | 0.72594700  | 2.47340400  |
| C  | 5.12079400 | -2.34171700 | -1.59738300 |
| C  | 4.25430800 | -3.24187100 | 0.48317500  |
| C  | 5.74077100 | -0.40143200 | 3.39672500  |
| C  | 6.90383300 | -2.25178100 | 2.34397400  |
| C  | 4.70071000 | -3.49126400 | -2.26947200 |
| H  | 5.62448500 | -1.54572900 | -2.13887100 |
| C  | 3.84204800 | -4.39098900 | -0.19167700 |
| H  | 4.07881500 | -3.15175800 | 1.54997200  |
| C  | 6.31162900 | -0.74618700 | 4.62371100  |
| H  | 5.07163000 | 0.45132200  | 3.33970200  |
| C  | 7.46985400 | -2.59129000 | 3.57295400  |
| H  | 7.13580900 | -2.84371700 | 1.46350100  |
| C  | 4.06000900 | -4.51562200 | -1.56718200 |
| H  | 4.87956300 | -3.58879700 | -3.33617900 |
| H  | 3.35060400 | -5.18868500 | 0.35655700  |
| C  | 7.17462000 | -1.84058500 | 4.71460500  |
| H  | 6.07798600 | -0.15990300 | 5.50766100  |
| H  | 8.14005700 | -3.44341500 | 3.63834900  |
| H  | 3.73830000 | -5.41240600 | -2.08847700 |
| H  | 7.61539700 | -2.10799700 | 5.67044800  |
| H  | 6.56047300 | 2.31985600  | -3.11617000 |
| C  | 4.45265200 | 2.49237200  | -3.46242000 |
| H  | 4.17957300 | 1.63985200  | -2.83352700 |
| H  | 3.64139300 | 3.22815700  | -3.41448300 |
| H  | 4.51154100 | 2.14000000  | -4.49748900 |
| Pd | 6.83997600 | 0.72654100  | -0.52098400 |
| C  | 8.74844100 | 1.68078200  | -1.27266700 |

|    |             |             |             |
|----|-------------|-------------|-------------|
| C  | 8.76235500  | 0.30455900  | -1.51666700 |
| H  | 8.67953800  | -0.05306600 | -2.54206700 |
| C  | 8.51868800  | -0.60040500 | -0.44498100 |
| H  | 8.38432300  | -1.65455100 | -0.67157100 |
| H  | 8.91914000  | -0.38666900 | 0.54565300  |
| Ru | 2.02425100  | 0.29499400  | -0.22586600 |
| H  | 9.05647800  | 2.07937400  | -0.30711700 |
| H  | 8.74410800  | 2.37944400  | -2.10327900 |
| C  | -2.56412600 | 3.34510100  | 0.70257800  |
| C  | -2.48724300 | 2.76261000  | -0.72591700 |
| C  | -3.35355600 | 4.65973500  | 0.70302500  |
| C  | -1.61275700 | 3.55602100  | -1.72254500 |
| H  | -3.50588100 | 2.65250100  | -1.10744800 |
| N  | -1.84732600 | 1.42305600  | -0.72412800 |
| H  | -4.35331400 | 4.52637100  | 0.27575500  |
| H  | -3.47866200 | 5.03321200  | 1.72374600  |
| H  | -2.84056700 | 5.43882600  | 0.12593700  |
| O  | -0.45134900 | 2.69660500  | -1.94038300 |
| H  | -1.24925400 | 4.51315300  | -1.34616700 |
| H  | -2.09896900 | 3.70487700  | -2.68977200 |
| C  | -0.73656700 | 1.50734600  | -1.37157500 |
| C  | 0.27821400  | 0.47315300  | -1.56257700 |
| C  | 0.33850000  | -0.87088700 | -1.00537000 |
| C  | 1.45864500  | 0.67552600  | -2.35458600 |
| C  | 1.55927600  | -1.46225000 | -1.48035400 |
| P  | -0.95913800 | -1.68578800 | -0.00053400 |
| C  | 2.24087200  | -0.51272900 | -2.30152600 |
| H  | 1.69802800  | 1.57950200  | -2.89572100 |
| H  | 1.90413800  | -2.46217300 | -1.25498300 |
| C  | -0.07551900 | -2.39098300 | 1.44799100  |
| C  | -1.40280800 | -3.14358900 | -1.02442000 |
| H  | 3.19004200  | -0.66925200 | -2.79419900 |
| C  | -0.29787800 | -1.80851000 | 2.70493200  |
| C  | 0.81796200  | -3.46691000 | 1.33747100  |
| C  | -1.33083600 | -3.09204500 | -2.42546000 |
| C  | -1.94745700 | -4.28190500 | -0.40633300 |
| C  | 0.37976700  | -2.27868500 | 3.83193900  |
| H  | -1.00086000 | -0.98498200 | 2.79587000  |
| C  | 1.48665200  | -3.94145100 | 2.46661400  |
| H  | 0.99206600  | -3.93550700 | 0.37485600  |
| C  | -1.78331800 | -4.16786900 | -3.19243000 |
| H  | -0.92198700 | -2.21661200 | -2.92159100 |
| C  | -2.39617000 | -5.35462500 | -1.17747100 |
| H  | -2.01532600 | -4.33398400 | 0.67638800  |

|    |              |             |             |
|----|--------------|-------------|-------------|
| C  | 1.27365800   | -3.34603500 | 3.71379800  |
| H  | 0.20315000   | -1.81752600 | 4.79937400  |
| H  | 2.17341100   | -4.77728800 | 2.37320100  |
| C  | -2.31526400  | -5.30079200 | -2.57168500 |
| H  | -1.71841100  | -4.11939100 | -4.27570400 |
| H  | -2.81035200  | -6.23148300 | -0.68807400 |
| H  | 1.79527800   | -3.71916700 | 4.59043100  |
| H  | -2.66584100  | -6.13624100 | -3.17060500 |
| H  | -3.12924100  | 2.61316400  | 1.29140800  |
| C  | -1.18258000  | 3.49725600  | 1.35200800  |
| H  | -0.64665600  | 2.54296700  | 1.37277100  |
| H  | -0.56124700  | 4.22939300  | 0.82243000  |
| H  | -1.28527500  | 3.84646000  | 2.38502000  |
| Pd | -2.68932200  | -0.23350000 | 0.39806100  |
| C  | -12.13862400 | -2.40959800 | -1.04987000 |
| C  | -11.51410700 | -1.83643900 | 0.06100100  |
| C  | -10.23926700 | -1.28289000 | -0.05886800 |
| C  | -9.57583900  | -1.29297100 | -1.29651100 |
| C  | -10.21609000 | -1.86496500 | -2.40852600 |
| C  | -11.48633700 | -2.42237200 | -2.28717700 |
| H  | -13.13019800 | -2.84312800 | -0.95268100 |
| H  | -12.02109200 | -1.81790900 | 1.02145800  |
| H  | -9.77628200  | -0.83245800 | 0.81158000  |
| H  | -9.69729700  | -1.86376200 | -3.36161000 |
| H  | -11.96935700 | -2.86619900 | -3.15322300 |
| C  | -8.20118200  | -0.72738000 | -1.48640800 |
| C  | -7.41423900  | -0.27845900 | -0.25866600 |
| H  | -7.56816100  | -1.00173400 | 0.54996500  |
| O  | -7.71321800  | -0.65421600 | -2.60904300 |
| C  | -7.92028300  | 1.10216800  | 0.24216900  |
| O  | -8.84489800  | 1.68364900  | -0.35439400 |
| N  | -7.20086100  | 1.47670600  | 1.31159400  |
| C  | -7.12223600  | 2.78385500  | 1.77438800  |
| C  | -6.37379500  | 2.99140500  | 2.95918200  |
| C  | -7.64345100  | 3.93311000  | 1.12672700  |
| C  | -6.14826400  | 4.26896200  | 3.46636200  |
| H  | -5.97688100  | 2.11873500  | 3.47092100  |
| C  | -7.41093900  | 5.20821000  | 1.64395800  |
| H  | -8.23455200  | 3.80054300  | 0.22979800  |
| C  | -6.66346600  | 5.39347300  | 2.81147000  |
| H  | -5.57003800  | 4.38849700  | 4.37988500  |
| H  | -7.82382300  | 6.07110500  | 1.12554200  |
| H  | -6.49204700  | 6.39105800  | 3.20614800  |
| C  | -4.93679300  | -2.24991400 | 0.67220100  |

|   |             |             |             |
|---|-------------|-------------|-------------|
| C | -4.13353400 | -1.31183300 | 1.55636400  |
| C | -4.48955200 | 0.07636800  | 1.58036300  |
| C | -5.21144200 | 0.65044000  | 0.52255200  |
| C | -5.89191700 | -0.19313000 | -0.54993500 |
| C | -5.27252800 | -1.60563800 | -0.68270100 |
| H | -5.86196900 | -2.52575600 | 1.20108200  |
| H | -4.38371300 | -3.18012000 | 0.50634000  |
| H | -4.34793300 | -1.53497500 | -1.26897800 |
| H | -5.95505900 | -2.24543200 | -1.25048500 |
| H | -5.11956000 | 1.71465500  | 0.35709400  |
| H | -4.17222700 | 0.71494700  | 2.40202600  |
| H | -5.78381700 | 0.32364500  | -1.50834900 |
| H | -3.73751300 | -1.74506400 | 2.47373900  |

### IM-II'

1 1

|   |            |             |             |
|---|------------|-------------|-------------|
| C | 6.10891800 | 3.47535400  | -1.92048800 |
| C | 6.11198200 | 3.43900700  | -0.37509000 |
| C | 6.67201500 | 4.80935500  | -2.42573800 |
| C | 5.11252200 | 4.39104300  | 0.31259300  |
| H | 7.12971800 | 3.62570600  | -0.02341100 |
| N | 5.67681800 | 2.10873200  | 0.12707800  |
| H | 7.66791600 | 5.00635400  | -2.01274900 |
| H | 6.75604200 | 4.79954400  | -3.51723400 |
| H | 6.02353900 | 5.65086800  | -2.15531800 |
| O | 4.05570600 | 3.50581300  | 0.79277900  |
| H | 4.65197000 | 5.12483800  | -0.34899200 |
| H | 5.53917600 | 4.89831200  | 1.18163400  |
| C | 4.51759600 | 2.24905900  | 0.68865500  |
| C | 3.62953200 | 1.21883800  | 1.20853300  |
| C | 3.75906000 | -0.22664800 | 1.10323600  |
| C | 2.39660300 | 1.50301900  | 1.89101100  |
| C | 2.60221900 | -0.79866500 | 1.73635600  |
| P | 5.19376300 | -1.12000100 | 0.43581100  |
| C | 1.77582700 | 0.26358800  | 2.21517100  |
| H | 2.01513700 | 2.48959500  | 2.10886600  |
| H | 2.39522200 | -1.85556100 | 1.83513500  |
| C | 4.55348800 | -2.25192000 | -0.84979100 |
| C | 5.72734400 | -2.19837400 | 1.81907800  |
| H | 0.83014500 | 0.14534500  | 2.72458300  |
| C | 4.83347800 | -1.98152600 | -2.19720300 |
| C | 3.76025400 | -3.35914800 | -0.51396700 |
| C | 5.53092500 | -1.80369700 | 3.15163100  |
| C | 6.42218900 | -3.38796400 | 1.54573600  |

|    |             |             |             |
|----|-------------|-------------|-------------|
| C  | 4.31227600  | -2.80259300 | -3.19960200 |
| H  | 5.45132600  | -1.12693900 | -2.45913000 |
| C  | 3.24638900  | -4.17990100 | -1.51775500 |
| H  | 3.53902800  | -3.57848300 | 0.52440000  |
| C  | 6.00973300  | -2.59862700 | 4.19501100  |
| H  | 4.99963900  | -0.88510100 | 3.38084600  |
| C  | 6.89687600  | -4.17817400 | 2.59289900  |
| H  | 6.58087000  | -3.70459400 | 0.51935100  |
| C  | 3.51858100  | -3.90161700 | -2.86073700 |
| H  | 4.52992900  | -2.58676800 | -4.24147800 |
| H  | 2.63022900  | -5.03300800 | -1.25055300 |
| C  | 6.69090100  | -3.78646300 | 3.91859500  |
| H  | 5.84587800  | -2.28974400 | 5.22330600  |
| H  | 7.42544800  | -5.10104900 | 2.37226400  |
| H  | 3.11721900  | -4.54277300 | -3.64004500 |
| H  | 7.05878400  | -4.40486400 | 4.73206300  |
| H  | 6.79380600  | 2.67796400  | -2.23677400 |
| C  | 4.72928800  | 3.17226100  | -2.51769200 |
| H  | 4.35499100  | 2.20110900  | -2.18095800 |
| H  | 3.99234000  | 3.93698100  | -2.24643400 |
| H  | 4.78527300  | 3.14853400  | -3.61111200 |
| Pd | 6.82567600  | 0.36376200  | -0.23225900 |
| C  | 8.85006600  | 1.26597800  | -0.71461300 |
| C  | 8.70397300  | 0.02592600  | -1.34131100 |
| H  | 8.59761400  | -0.01086400 | -2.42462400 |
| C  | 8.33688700  | -1.11352400 | -0.57032700 |
| H  | 8.08376600  | -2.03410000 | -1.08911800 |
| H  | 8.74220300  | -1.24305200 | 0.43283300  |
| Ru | 1.97296100  | 0.40544800  | -0.00429900 |
| H  | 9.18648100  | 1.33284700  | 0.31899800  |
| H  | 8.94218800  | 2.16766700  | -1.31187000 |
| C  | -2.24307800 | 3.45357300  | 1.86931000  |
| C  | -2.20083100 | 3.42583200  | 0.32371600  |
| C  | -2.81529700 | 4.78522700  | 2.36948400  |
| C  | -1.17237300 | 4.37147900  | -0.33320400 |
| H  | -3.20819200 | 3.62842100  | -0.04522700 |
| N  | -1.77733400 | 2.09174400  | -0.16295400 |
| H  | -3.80313300 | 4.98200800  | 1.94031700  |
| H  | -2.91784300 | 4.77249500  | 3.45987900  |
| H  | -2.16143300 | 5.62809600  | 2.11280400  |
| O  | -0.11688800 | 3.47781100  | -0.79581800 |
| H  | -0.72010100 | 5.09693700  | 0.34451800  |
| H  | -1.57610100 | 4.89303700  | -1.20612600 |
| C  | -0.61418500 | 2.21932300  | -0.69636800 |

|    |             |             |             |
|----|-------------|-------------|-------------|
| C  | 0.27489700  | 1.17083100  | -1.19913400 |
| C  | 0.17302100  | -0.27659000 | -1.06142900 |
| C  | 1.49100500  | 1.46581400  | -1.90434700 |
| C  | 1.33138000  | -0.83180200 | -1.70760200 |
| P  | -1.23681900 | -1.19102700 | -0.30121800 |
| C  | 2.13485700  | 0.23460200  | -2.21634300 |
| H  | 1.84798100  | 2.45719800  | -2.14200600 |
| H  | 1.56342400  | -1.88420300 | -1.78839800 |
| C  | -0.42479400 | -2.40753100 | 0.82154600  |
| C  | -1.80517400 | -2.21621400 | -1.72504600 |
| H  | 3.07147200  | 0.12412300  | -2.74375500 |
| C  | -0.60454200 | -2.22034400 | 2.20059200  |
| C  | 0.34980400  | -3.48912800 | 0.37554500  |
| C  | -1.80479400 | -1.68439300 | -3.02552100 |
| C  | -2.40722300 | -3.46607800 | -1.50419600 |
| C  | 0.00271900  | -3.07967500 | 3.11966300  |
| H  | -1.22339200 | -1.39685700 | 2.54790500  |
| C  | 0.94746300  | -4.35418000 | 1.29350900  |
| H  | 0.48326700  | -3.66178000 | -0.68711900 |
| C  | -2.38736600 | -2.38999700 | -4.08022200 |
| H  | -1.35581000 | -0.71364100 | -3.21699400 |
| C  | -2.98852600 | -4.16921700 | -2.56081700 |
| H  | -2.42413500 | -3.89184200 | -0.50551900 |
| C  | 0.78208600  | -4.14736400 | 2.66674100  |
| H  | -0.14151700 | -2.92102500 | 4.18464400  |
| H  | 1.54221100  | -5.19080700 | 0.93757700  |
| C  | -2.98221200 | -3.63401800 | -3.85154700 |
| H  | -2.37546000 | -1.96694700 | -5.08103300 |
| H  | -3.44977600 | -5.13492200 | -2.37305300 |
| H  | 1.24791900  | -4.82287700 | 3.37862100  |
| H  | -3.43708200 | -4.18108900 | -4.67231400 |
| H  | -2.93858900 | 2.65326800  | 2.15438300  |
| C  | -0.88193000 | 3.14186700  | 2.50361700  |
| H  | -0.50202700 | 2.17227200  | 2.16896900  |
| H  | -0.13619600 | 3.90802100  | 2.25909800  |
| H  | -0.96837700 | 3.10892900  | 3.59512400  |
| Pd | -2.92346800 | 0.23181700  | 0.35106600  |
| C  | -9.64260600 | -4.97616900 | 0.09678500  |
| C  | -9.36197000 | -4.24574300 | -1.05972200 |
| C  | -8.91703900 | -2.92625100 | -0.96417700 |
| C  | -8.74444400 | -2.32467400 | 0.29311500  |
| C  | -9.03017700 | -3.07049100 | 1.45066700  |
| C  | -9.47620300 | -4.38456000 | 1.35433600  |
| H  | -9.99017200 | -6.00262700 | 0.02060600  |

|   |             |             |             |
|---|-------------|-------------|-------------|
| H | -9.49007300 | -4.70151800 | -2.03716900 |
| H | -8.70230600 | -2.37615700 | -1.87333900 |
| H | -8.89132200 | -2.59785000 | 2.41719800  |
| H | -9.69435300 | -4.95055700 | 2.25542000  |
| C | -8.24731300 | -0.92177700 | 0.47247700  |
| C | -7.91110700 | -0.08451600 | -0.76396700 |
| H | -8.61732500 | -0.32977900 | -1.55938100 |
| O | -8.11726200 | -0.44704000 | 1.59439800  |
| C | -8.09221700 | 1.39701100  | -0.41810600 |
| O | -9.16454700 | 1.96079000  | -0.24808500 |
| N | -6.85003500 | 1.97623500  | -0.35699700 |
| C | -6.63042500 | 3.33367300  | -0.00716900 |
| C | -7.29304000 | 3.89889000  | 1.09132300  |
| C | -5.74401300 | 4.11645700  | -0.76064700 |
| C | -7.07044300 | 5.23505200  | 1.42528300  |
| H | -7.97971200 | 3.28912000  | 1.66620100  |
| C | -5.51950900 | 5.44939500  | -0.41333300 |
| H | -5.23941900 | 3.68529400  | -1.61937500 |
| C | -6.18279900 | 6.01548200  | 0.67856800  |
| H | -7.58817500 | 5.66528000  | 2.27798700  |
| H | -4.82944000 | 6.04658800  | -1.00291100 |
| H | -6.00942200 | 7.05390200  | 0.94545300  |
| C | -5.26333300 | -1.84814600 | 0.24323600  |
| C | -4.73458600 | -0.67274700 | 1.04359000  |
| C | -5.00928500 | 0.67341200  | 0.69615100  |
| C | -5.73636600 | 1.03711800  | -0.60186400 |
| C | -6.44476900 | -0.15464300 | -1.29746900 |
| C | -5.65284200 | -1.46450800 | -1.18884400 |
| H | -6.12992000 | -2.27025500 | 0.76780000  |
| H | -4.52150900 | -2.65355400 | 0.20439900  |
| H | -4.73528500 | -1.33581300 | -1.77619500 |
| H | -6.21386200 | -2.27952300 | -1.65860000 |
| H | -5.04745600 | 1.50213900  | -1.31249300 |
| H | -5.11024000 | 1.41551800  | 1.48762300  |
| H | -6.52197100 | 0.09925000  | -2.36046700 |
| H | -4.59526900 | -0.88718500 | 2.10530700  |

## IM-II

11

|   |            |            |             |
|---|------------|------------|-------------|
| C | 5.94856600 | 3.32703100 | -2.56846900 |
| C | 6.08258900 | 3.48168300 | -1.03634300 |
| C | 6.42205600 | 4.60096600 | -3.27899600 |
| C | 5.11365400 | 4.48859700 | -0.38608100 |
| H | 7.11956600 | 3.73347500 | -0.80030400 |

|   |            |             |             |
|---|------------|-------------|-------------|
| N | 5.73337300 | 2.21419400  | -0.34022200 |
| H | 7.44207800 | 4.87139500  | -2.98250100 |
| H | 6.41413600 | 4.45870400  | -4.36446300 |
| H | 5.77052400 | 5.45422300  | -3.05697400 |
| O | 4.12286600 | 3.64563200  | 0.27765300  |
| H | 4.58256800 | 5.13009900  | -1.08946800 |
| H | 5.59139600 | 5.10170400  | 0.38217100  |
| C | 4.61438700 | 2.39561300  | 0.28800000  |
| C | 3.79852000 | 1.41563000  | 0.99304400  |
| C | 3.98189900 | -0.02561700 | 1.07691500  |
| C | 2.59612200 | 1.74651000  | 1.70708000  |
| C | 2.89055800 | -0.54485900 | 1.85325700  |
| P | 5.40404500 | -0.95745300 | 0.43746100  |
| C | 2.04798800 | 0.54267600  | 2.23403900  |
| H | 2.18893400 | 2.74051200  | 1.82254300  |
| H | 2.73897800 | -1.58397900 | 2.10811600  |
| C | 4.72776800 | -2.29544400 | -0.61048100 |
| C | 6.09394800 | -1.79602700 | 1.91377300  |
| H | 1.13963100 | 0.46124700  | 2.81278800  |
| C | 4.86757300 | -2.20014600 | -2.00314800 |
| C | 4.04683800 | -3.38814400 | -0.05396200 |
| C | 5.96315800 | -1.22884300 | 3.19071400  |
| C | 6.84883700 | -2.96994200 | 1.75281600  |
| C | 4.31342600 | -3.17726700 | -2.83233500 |
| H | 5.40374300 | -1.35937200 | -2.43519300 |
| C | 3.50186400 | -4.36649000 | -0.88597400 |
| H | 3.93675600 | -3.47468300 | 1.02150600  |
| C | 6.56556200 | -1.83919200 | 4.29296000  |
| H | 5.38998100 | -0.31768800 | 3.33195600  |
| C | 7.44668000 | -3.57527600 | 2.85823700  |
| H | 6.96093600 | -3.41750200 | 0.76976700  |
| C | 3.62944400 | -4.26062200 | -2.27412800 |
| H | 4.42101800 | -3.09550000 | -3.90989900 |
| H | 2.97593300 | -5.21024500 | -0.44963500 |
| C | 7.30546400 | -3.01256700 | 4.12994100  |
| H | 6.45242400 | -1.39733600 | 5.27866600  |
| H | 8.02009000 | -4.48807400 | 2.72547400  |
| H | 3.20256700 | -5.02376100 | -2.91824700 |
| H | 7.76993500 | -3.48713700 | 4.98928600  |
| H | 6.62865700 | 2.51123800  | -2.84425900 |
| C | 4.53371700 | 2.92261700  | -3.00035100 |
| H | 4.22064300 | 1.99712200  | -2.50979300 |
| H | 3.79820300 | 3.70066600  | -2.76600500 |
| H | 4.49965400 | 2.75638700  | -4.08207300 |



|    |             |             |             |
|----|-------------|-------------|-------------|
| Pd | 6.90133400  | 0.46257000  | -0.58155900 |
| C  | 8.83803000  | 1.33754300  | -1.37794100 |
| C  | 8.67954000  | 0.01877400  | -1.81184700 |
| H  | 8.47268800  | -0.17086000 | -2.86427600 |
| C  | 8.42761000  | -1.01076200 | -0.86063400 |
| H  | 8.15841200  | -2.00012400 | -1.22037600 |
| H  | 8.93125100  | -0.99024400 | 0.10533300  |
| Ru | 2.11136300  | 0.38844500  | 0.00328000  |
| H  | 9.26538200  | 1.55671700  | -0.40044400 |
| H  | 8.84142700  | 2.14793700  | -2.09989700 |
| C  | -2.15395200 | 3.36228400  | 1.81508500  |
| C  | -2.18161000 | 3.21546000  | 0.27547200  |
| C  | -2.73012100 | 4.71636200  | 2.24428200  |
| C  | -1.21783000 | 4.14039300  | -0.50030400 |
| H  | -3.21254800 | 3.35401000  | -0.06053400 |
| N  | -1.72864900 | 1.86131300  | -0.12133000 |
| H  | -3.74331100 | 4.86200700  | 1.85683200  |
| H  | -2.77429400 | 4.78394500  | 3.33662900  |
| H  | -2.11049200 | 5.54968900  | 1.89086700  |
| O  | -0.15826400 | 3.24661700  | -0.95342300 |
| H  | -0.75601400 | 4.92424300  | 0.10211400  |
| H  | -1.68043700 | 4.58688200  | -1.38527300 |
| C  | -0.59733000 | 1.98478900  | -0.72075700 |
| C  | 0.31172900  | 0.92752700  | -1.16740600 |
| C  | 0.29077800  | -0.49637000 | -0.86088000 |
| C  | 1.46996900  | 1.19026900  | -1.97440900 |
| C  | 1.43955100  | -1.07321900 | -1.50442900 |
| P  | -1.04506600 | -1.38960600 | 0.04356400  |
| C  | 2.15924600  | -0.03988500 | -2.17973600 |
| H  | 1.76016000  | 2.16076900  | -2.34924800 |
| H  | 1.71051800  | -2.11937000 | -1.48371600 |
| C  | -0.13338600 | -2.37281200 | 1.30698600  |
| C  | -1.54057800 | -2.64550400 | -1.21197300 |
| H  | 3.06816300  | -0.16983200 | -2.75009100 |
| C  | -0.27899500 | -1.98976600 | 2.64902200  |
| C  | 0.69188900  | -3.46288000 | 0.99349200  |
| C  | -1.54633800 | -2.33004900 | -2.58084100 |
| C  | -2.07369800 | -3.87835400 | -0.79891400 |
| C  | 0.40754900  | -2.66842400 | 3.65907900  |
| H  | -0.93340000 | -1.15753200 | 2.89626400  |
| C  | 1.36741100  | -4.14904700 | 2.00414000  |
| H  | 0.80367100  | -3.78231800 | -0.03720300 |
| C  | -2.06068800 | -3.23259200 | -3.51421400 |
| H  | -1.15367100 | -1.37745400 | -2.92443600 |

|    |              |             |             |
|----|--------------|-------------|-------------|
| C  | -2.58515400  | -4.77883100 | -1.73465400 |
| H  | -2.08802900  | -4.13825600 | 0.25554400  |
| C  | 1.23225200   | -3.74991600 | 3.33760700  |
| H  | 0.28938600   | -2.36043700 | 4.69412700  |
| H  | 1.99898200   | -4.99561800 | 1.75047500  |
| C  | -2.58068800  | -4.45982800 | -3.09513900 |
| H  | -2.05452000  | -2.97471200 | -4.56974600 |
| H  | -2.98900600  | -5.72983000 | -1.39847300 |
| H  | 1.75815300   | -4.28619800 | 4.12242100  |
| H  | -2.98072200  | -5.16078500 | -3.82210500 |
| H  | -2.81771900  | 2.57268600  | 2.19083100  |
| C  | -0.75811200  | 3.12484900  | 2.40458600  |
| H  | -0.36365000  | 2.14977500  | 2.10602400  |
| H  | -0.04768700  | 3.89708800  | 2.08520500  |
| H  | -0.79670600  | 3.15042900  | 3.49908200  |
| Pd | -2.79481200  | 0.01183300  | 0.57228100  |
| C  | -12.32283300 | -2.84064000 | 0.12816900  |
| C  | -11.49881700 | -2.12402500 | 0.99935400  |
| C  | -10.32512600 | -1.53447200 | 0.52909400  |
| C  | -9.96943600  | -1.65155400 | -0.82455800 |
| C  | -10.81205400 | -2.36413900 | -1.69589200 |
| C  | -11.97772500 | -2.95892700 | -1.22285400 |
| H  | -13.23308800 | -3.30361700 | 0.49912700  |
| H  | -11.77094800 | -2.02190500 | 2.04587900  |
| H  | -9.71073300  | -0.95598300 | 1.20803600  |
| H  | -10.53148900 | -2.44297600 | -2.74109300 |
| H  | -12.61851200 | -3.51364800 | -1.90227400 |
| C  | -8.72504400  | -1.04754400 | -1.38847900 |
| C  | -7.66632500  | -0.49348200 | -0.43183600 |
| H  | -7.65075500  | -1.10896000 | 0.47399200  |
| O  | -8.53766300  | -1.01424100 | -2.59881300 |
| C  | -7.99420700  | 0.93592500  | 0.03227700  |
| O  | -9.09762000  | 1.35411900  | 0.36339400  |
| N  | -6.82496400  | 1.64925300  | 0.01544600  |
| C  | -6.71695200  | 3.00564200  | 0.42288000  |
| C  | -7.35081600  | 3.45822800  | 1.58803600  |
| C  | -5.96405400  | 3.90107200  | -0.35066300 |
| C  | -7.23350100  | 4.79574200  | 1.96827600  |
| H  | -7.93940100  | 2.76546800  | 2.17708100  |
| C  | -5.84573500  | 5.23484600  | 0.04159400  |
| H  | -5.48613300  | 3.55600100  | -1.26185300 |
| C  | -6.48095900  | 5.68877400  | 1.20085800  |
| H  | -7.72964700  | 5.13844300  | 2.87192200  |
| H  | -5.26130400  | 5.92066500  | -0.56524000 |

|   |             |             |             |
|---|-------------|-------------|-------------|
| H | -6.39084700 | 6.72817800  | 1.50248100  |
| C | -5.11647400 | -2.06617100 | 0.47067100  |
| C | -4.59226600 | -0.90298100 | 1.29628000  |
| C | -4.86570300 | 0.44851700  | 0.95403200  |
| C | -5.63511700 | 0.82686500  | -0.31436400 |
| C | -6.26404800 | -0.37848500 | -1.05198200 |
| C | -5.41900500 | -1.65496200 | -0.97459300 |
| H | -6.03131000 | -2.45911800 | 0.94208700  |
| H | -4.40033000 | -2.89482600 | 0.47433100  |
| H | -4.47315900 | -1.48202600 | -1.50359300 |
| H | -5.93799300 | -2.46309700 | -1.50306300 |
| H | -5.00418900 | 1.40125400  | -0.99697500 |
| H | -4.93068000 | 1.19054500  | 1.75059400  |
| H | -6.40307300 | -0.10173000 | -2.10094600 |
| H | -4.44725300 | -1.13009500 | 2.35456600  |

**PdL+**

1 1

|   |             |             |             |
|---|-------------|-------------|-------------|
| C | 3.66134400  | 3.57675300  | -2.01781500 |
| C | 3.72588900  | 3.52462500  | -0.47427400 |
| C | 4.19111000  | 4.92172200  | -2.53011800 |
| C | 2.75040400  | 4.46588000  | 0.26194300  |
| H | 4.75602500  | 3.71505600  | -0.16296400 |
| N | 3.32135900  | 2.18746500  | 0.03634500  |
| H | 5.20028400  | 5.12524400  | -2.15428500 |
| H | 4.23206600  | 4.92357300  | -3.62418100 |
| H | 3.54493800  | 5.75348000  | -2.22632200 |
| O | 1.72908200  | 3.57008900  | 0.79518800  |
| H | 2.24978000  | 5.19340000  | -0.37726700 |
| H | 3.21391100  | 4.97973900  | 1.10794600  |
| C | 2.19191500  | 2.31678400  | 0.65849800  |
| C | 1.33515000  | 1.27875500  | 1.21582500  |
| C | 1.47219300  | -0.16626900 | 1.10856300  |
| C | 0.12803700  | 1.55482000  | 1.94496000  |
| C | 0.34524600  | -0.74506900 | 1.78849700  |
| P | 2.88315100  | -1.04286400 | 0.37311200  |
| C | -0.47179500 | 0.31231000  | 2.29502600  |
| H | -0.25159600 | 2.53950200  | 2.17263900  |
| H | 0.15134900  | -1.80311300 | 1.89858300  |
| C | 2.20215300  | -2.20330400 | -0.86548700 |
| C | 3.52535800  | -2.09525900 | 1.72808900  |
| H | -1.39608100 | 0.18757200  | 2.83984700  |
| C | 2.42109800  | -1.95355400 | -2.22850300 |
| C | 1.43920600  | -3.31476900 | -0.47780700 |

|    |             |             |             |
|----|-------------|-------------|-------------|
| C  | 3.37688800  | -1.71407900 | 3.07017300  |
| C  | 4.26902000  | -3.24452400 | 1.41276100  |
| C  | 1.86597700  | -2.79631200 | -3.19391700 |
| H  | 3.01697500  | -1.09781600 | -2.53310800 |
| C  | 0.89037500  | -4.15635100 | -1.44531500 |
| H  | 1.26669000  | -3.52009700 | 0.57282300  |
| C  | 3.95634100  | -2.48154900 | 4.08302000  |
| H  | 2.80805900  | -0.82655700 | 3.32991100  |
| C  | 4.84349800  | -4.00752100 | 2.42921900  |
| H  | 4.38956800  | -3.54955700 | 0.37751900  |
| C  | 1.09888800  | -3.89679200 | -2.80317300 |
| H  | 2.03589900  | -2.59512500 | -4.24757300 |
| H  | 0.29626700  | -5.01184800 | -1.13928400 |
| C  | 4.68848100  | -3.62801400 | 3.76567500  |
| H  | 3.83141800  | -2.18341200 | 5.11990700  |
| H  | 5.41038000  | -4.89901900 | 2.17697400  |
| H  | 0.66937400  | -4.55406000 | -3.55352600 |
| H  | 5.13588500  | -4.22399500 | 4.55564900  |
| H  | 4.34010300  | 2.79041500  | -2.37084900 |
| C  | 2.26345100  | 3.26581300  | -2.56605100 |
| H  | 1.91544700  | 2.28466000  | -2.23012800 |
| H  | 1.52754900  | 4.01658500  | -2.25549300 |
| H  | 2.27797800  | 3.25854000  | -3.66113200 |
| Pd | 4.46161800  | 0.45454500  | -0.38945200 |
| C  | 6.44719600  | 1.36979300  | -0.99501600 |
| C  | 6.26523000  | 0.13363700  | -1.61988800 |
| H  | 6.08718700  | 0.10370900  | -2.69400600 |
| C  | 5.95591000  | -1.01215800 | -0.83258700 |
| H  | 5.67464800  | -1.93188800 | -1.33802500 |
| H  | 6.43097600  | -1.14430400 | 0.13911700  |
| Ru | -0.35459600 | 0.44852400  | 0.06707300  |
| H  | 6.84896800  | 1.43040300  | 0.01546500  |
| H  | 6.49799500  | 2.27682800  | -1.58894200 |
| C  | -4.34015300 | 3.84739400  | 1.96967000  |
| C  | -4.31781000 | 3.75621800  | 0.42649000  |
| C  | -4.77211500 | 5.24797000  | 2.42046700  |
| C  | -3.21643800 | 4.57985600  | -0.27762800 |
| H  | -5.30756300 | 4.03561800  | 0.05322200  |
| N  | -4.02248800 | 2.37136200  | -0.00421200 |
| H  | -5.74225500 | 5.52433100  | 1.99221200  |
| H  | -4.86020900 | 5.29194700  | 3.51099100  |
| H  | -4.04330700 | 6.00999900  | 2.11896900  |
| O  | -2.27586200 | 3.57668900  | -0.75570100 |
| H  | -2.67043800 | 5.26275300  | 0.37559500  |

|    |             |             |             |
|----|-------------|-------------|-------------|
| H  | -3.59061500 | 5.12971800  | -1.14556500 |
| C  | -2.87152100 | 2.36737500  | -0.58442600 |
| C  | -2.06922700 | 1.23711400  | -1.08133200 |
| C  | -2.20476200 | -0.21315400 | -0.91870600 |
| C  | -0.86831400 | 1.48315800  | -1.83460900 |
| C  | -1.07546500 | -0.80002900 | -1.59047900 |
| P  | -3.60519200 | -1.18009900 | -0.14175200 |
| C  | -0.26228000 | 0.23468300  | -2.14475700 |
| H  | -0.49650900 | 2.46111400  | -2.10091000 |
| H  | -0.87352300 | -1.85902700 | -1.66255200 |
| C  | -2.71217800 | -2.36552800 | 0.97177400  |
| C  | -4.08488700 | -2.25578500 | -1.56860000 |
| H  | 0.65516300  | 0.09231100  | -2.69737900 |
| C  | -2.82906700 | -2.15878000 | 2.35500400  |
| C  | -1.94604300 | -3.44861400 | 0.51424400  |
| C  | -3.99210500 | -1.80054000 | -2.89432000 |
| C  | -4.67946000 | -3.50683900 | -1.32606300 |
| C  | -2.17296900 | -2.99425100 | 3.26176000  |
| H  | -3.44150000 | -1.33578600 | 2.71555000  |
| C  | -1.30335000 | -4.29520100 | 1.41998700  |
| H  | -1.85590100 | -3.64138900 | -0.54923700 |
| C  | -4.46234200 | -2.58547000 | -3.95027000 |
| H  | -3.55181900 | -0.83120100 | -3.10857100 |
| C  | -5.14166900 | -4.29169200 | -2.38234300 |
| H  | -4.77467400 | -3.87272000 | -0.30747100 |
| C  | -1.40753000 | -4.06632100 | 2.79509800  |
| H  | -2.27044500 | -2.81584500 | 4.32908100  |
| H  | -0.72119300 | -5.13548400 | 1.05208800  |
| C  | -5.03401500 | -3.83504100 | -3.69968700 |
| H  | -4.37898300 | -2.21859600 | -4.96979400 |
| H  | -5.58904800 | -5.26022200 | -2.17570200 |
| H  | -0.90677600 | -4.72685900 | 3.49736600  |
| H  | -5.39620200 | -4.44610500 | -4.52150800 |
| H  | -5.10634000 | 3.12931400  | 2.29535000  |
| C  | -3.00750800 | 3.42967200  | 2.60541200  |
| H  | -2.72790600 | 2.41471600  | 2.30672900  |
| H  | -2.19431500 | 4.10931400  | 2.32351600  |
| H  | -3.08360400 | 3.44918300  | 3.69796200  |
| Pd | -4.89473300 | 0.44304200  | 0.57780900  |

## 10. References

- [1] M. J. Frisch, G. W. Trucks, H. B. Schlegel, G. E. Scuseria, M. A. Robb, J. R. Cheeseman, G. Scalmani, V. Barone, B. Mennucci, G. A. Petersson, H. Nakatsuji, M. Caricato, H. P. H. X. Li, A. F. Izmaylov, J. Bloino, G. Zheng, J. L. Sonnenberg, M. Hada, M. Ehara, K. Toyota, R. Fukuda, J. Hasegawa, M. Ishida, T. Nakajima, Y. Honda, O. Kitao, H. Nakai, T. Vreven, J. A. Montgomery, Jr., J. E. Peralta, F. Ogliaro, M. Bearpark, J. J. Heyd, E. Brothers, K. N. Kudin, V. N. Staroverov, T. Keith, R. Kobayashi, J. Normand, K. Raghavachari, A. Rendell, J. C. Burant, S. S. Iyengar, J. Tomasi, M. Cossi, N. Rega, J. M. Millam, M. Klene, J. E. Knox, J. B. Cross, V. Bakken, C. Adamo, J. Jaramillo, R. Gomperts, R. E. Stratmann, O. Yazyev, A. J. Austin, R. Cammi, C. Pomelli, J. W. Ochterski, R. L. Martin, K. Morokuma, V. G. Zakrzewski, G. A. Voth, P. Salvador, J. J. Dannenberg, S. Dapprich, A. D. Daniels, O. Farkas, J. B. Foresman, J. V. Ortiz, J. Cioslowski, D. J. Fox, D.01 ed., Gaussian, Inc., Wallingford CT, **2013**.
- [2] R. Ditchfield, W. J. Hehre, J. A. Pople, *J. Chem. Phys.*, **1971**, *54*, 724.
- [3] M. M. Francl, W. J. Pietro, W. J. Hehre, J. S. Binkley, M. S. Gordon, D. J. DeFrees, J. A. Pople, *J. Chem. Phys.*, **1982**, *77*, 3654.
- [4] M. S. Gordon, J. S. Binkley, J. A. Pople, W. J. Pietro, W. J. Hehre, *J. Am. Chem. Soc.* **1982**, *104*, 2797.
- [5] P. C. Hariharan, J. A. Pople, *Theor. Chim. Acta*, **1973**, *28*, 213.
- [6] W. J. Hehre, R. Ditchfield, J. A. Pople, *J. Chem. Phys.*, **1972**, *56*, 2257.
- [7] D. Andrae, U. Häußermann, M. Dolg, H. Stoll, H. Preuß, *Theor. Chim. Acta*, **1990**, *77*, 123.
- [8] J. M. L. Martin, A. Sundermann, *J. Chem. Phys.*, **2001**, *114*, 3408.
- [9] S. Grimme, J. Antony, S. Ehrlich, H. Krieg, *J. Chem. Phys.*, **2010**, *132*, 154104.
- [10] A. V. Marenich, C. J. Cramer, D. G. Truhlar, *J. Phys. Chem B*, **2009**, *113*, 6378.
